# Supplementary material
Source: PubMed Central journal article supplement (PMC9652782)
Supplement: NIHMS1848827-supplement-Supporting_information.pdf [file NIHMS1848827-supplement-Supporting_information.pdf]

# Supporting Information

## Photochemical Regioselective C(sp<sup>3</sup>)-H Amination of Amides

### Using *N*-haloimides

Lei Pan, Joseph Elmasry, Tomas Oscorima, Maria Victoria Cooke, Sébastien Laulhé\*

Department of Chemistry and Chemical Biology, Indiana University-Purdue University Indianapolis, Indianapolis, IN 46202, USA.

### Table of Contents

|                                                                                               |            |
|-----------------------------------------------------------------------------------------------|------------|
| <b>General Information</b>                                                                    | <b>S1</b>  |
| <b>Procedure for Preparation of Starting Materials</b>                                        | <b>S2</b>  |
| <b>General Procedure for the Synthesis of C(sp<sup>3</sup>)-H Amination of Amides Product</b> | <b>S3</b>  |
| <b>Table of Reaction Optimization</b>                                                         | <b>S4</b>  |
| <b>Additional Substrate Scope Explored for the Transformation</b>                             | <b>S5</b>  |
| <b>UV-vis Spectra</b>                                                                         | <b>S6</b>  |
| <b>Calculated Energy Reaction Pathway</b>                                                     | <b>S7</b>  |
| <b>Analytical Data of Compounds</b>                                                           | <b>S8</b>  |
| <b>GC-MS Spectra from Radical Trapping Experiment</b>                                         | <b>S23</b> |
| <b>Supplementary References</b>                                                               | <b>S25</b> |
| <b><sup>1</sup>H and <sup>13</sup>C NMR Spectra</b>                                           | <b>S26</b> |
| <b>Computational Methods</b>                                                                  | <b>S98</b> |

### General Information

All the solvents and commercially available reagents were purchased from commercial sources (Acros Organics, TCI, Alfa Aesar, Sigma-Aldrich, Oakwood) and used directly. Thin layer chromatography (TLC) was performed on EMD precoated plates (silica gel 60 F254, Art 5715) and visualized by fluorescence quenching under UV light or stains for TLC Plates. Column chromatography was performed on EMD Silica Gel 60 (200–300 Mesh) using a forced flow of 0.5–1.0 bar. The  $^1\text{H}$  and  $^{13}\text{C}$  NMR spectra were obtained on a Bruker AVANCE III-400 spectrometer.  $^1\text{H}$  NMR data was reported as: chemical shift ( $\delta$  ppm), multiplicity, coupling constant (Hz), and integration.  $^{13}\text{C}$  NMR data was reported in terms of chemical shift ( $\delta$  ppm), multiplicity, and coupling constant (Hz). High Resolution Mass Spectrometry (HRMS) analysis was obtained using Agilent Technologies 6520 Accurate-Mass Q-TOF LC/MS system. UV-Vis was obtained using GENESYS™ 10S UV-Vis Spectrophotometer and fisherbrand macro quartz cuvettes (cat. No. 14-958-112). Melting point was obtained using MPA160 Melting Point Apparatus. A Kessil broadband Blue LED lamp 34W (No. BL-20,391) was used for this light-promoted reaction. The vial was placed approximately 4 cm away from the Blue LED, with the LED shining directly at the side of the vial. 10ml microwave reaction vial secured by 20mm aluminum seals with 0.125-inch thick, blue PTFE / white silicone septa was used for the reaction.

## Procedure for Preparation of Starting Materials

### 1. The General Procedure for the Preparation of Amides 2:<sup>1</sup>

#### Procedure A:

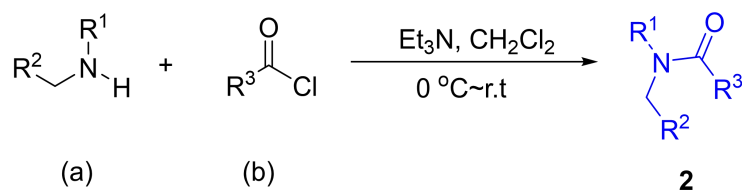

To a stirred solution of amine (a) (6 mmol) in dichloromethane (18 mL) were added triethylamine (6.6 mmol) and acyl chloride (b) (1.0 mmol) dropwisely under 0 °C. Then the mixture was stirred at r.t. overnight. Then the reaction mixture was poured into a separatory funnel and washed with saturated NaHCO<sub>3</sub> (aq) and extracted with 3\*40 mL CH<sub>2</sub>Cl<sub>2</sub>. The combined organic phases were dried over anhydrous Na<sub>2</sub>SO<sub>4</sub>, concentrated under reduced pressure and purified by column chromatography to afford products 2.

#### Procedure B:

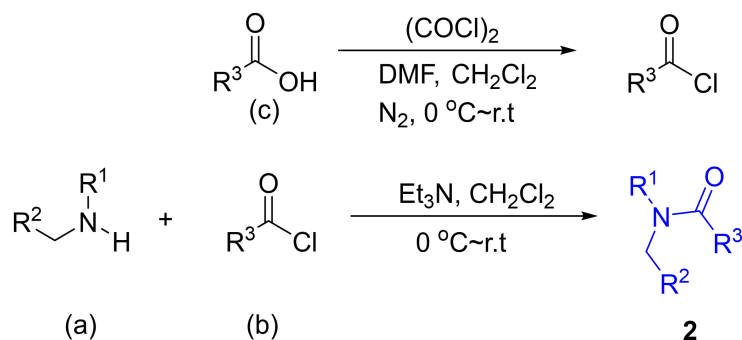

To a solution of carboxylic acid (c) (6 mmol, 1.0 equiv) and DMF (4 drops) in CH<sub>2</sub>Cl<sub>2</sub> (18 mL) at 0 °C was added (COCl)<sub>2</sub> (2 equiv) dropwise. After completion of addition, the solution was stirred for 5 minutes at 0 °C and then stirred at rt for 1 h. The solution was concentrated in vacuo to obtain the crude acyl chloride (b), which will be used without purification. To a mixture of amine (a) (6 mmol) (1.0 equiv) and triethylamine (2.0 equiv) in CH<sub>2</sub>Cl<sub>2</sub> (18 mL) at 0 °C was added the solution of crude acyl chloride (b) in CH<sub>2</sub>Cl<sub>2</sub> dropwise. After stirred for 5 minutes at 0 °C, the mixture was allowed to warm to room temperature and stirred overnight. The reaction was quenched with a saturated NaHCO<sub>3</sub> solution and extracted with CH<sub>2</sub>Cl<sub>2</sub>. The combined organic layers were washed with brine, dried over anhydrous Na<sub>2</sub>SO<sub>4</sub> and concentrated in vacuo. The residue was purified by column to give compounds 2.

### 2. The General Procedure for the Preparation of *N*-Boc amines 4:<sup>2</sup>

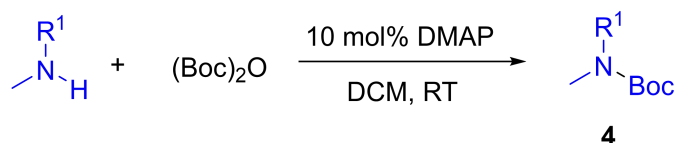

According to literature, the *N*-Boc amines can be synthesized by the condensation of corresponding amines with di-*tert*-butyl dicarbonate. The corresponding amines (1.0 equiv.) and

4-dimethylaminopyridine (10 mol %) were mixed in a flask with a magnetic stirring bar. DCM was added as solvent. Then a solution of di-*tert*-butyl dicarbonate (1.1 equiv.) in DCM was added slowly under ice bath conditions. The mixture was stirred 10 min at 0 °C and then 24 h at rt. The solution was washed with water and brine, then dried over MgSO<sub>4</sub> and concentrated. The crude product was purified by flash column chromatography, and corresponding *N*-Boc amines were obtained.

### 3. Synthesis of *N*-haloimides.<sup>3</sup>

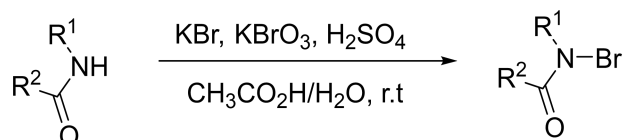

To a mixture of imides (8 mmol), KBrO<sub>3</sub> (4 mmol) and sulphuric acid (97%, 0.33 mL, 7.58 g, 6 mmol) in aqueous acetic acid (70%, 5.6 mL), KBr (0.637g, 5.4 mmol) was added portionwise at room temperature. The reaction mixture was stirred at room temperature overnight, the precipitate was filtered off, washed with water and dried to afford the crude product. The crude product was crystallized from acetic acid/water to get pure product which was thoroughly vacuum-dried at room temperature.

### General Procedure for the Synthesis of **3** or **5**.

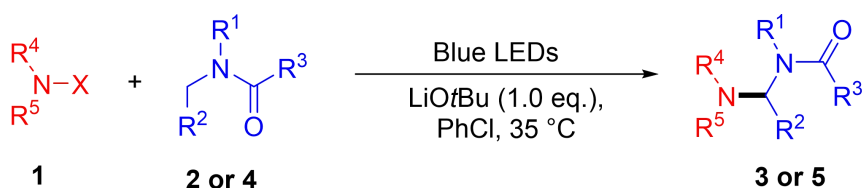

A 10 mL microwave vial was charged with *N*-halo saccharins or *N*-halo phthalimides or other nitrogen sources (0.2 mmol), LiOtBu (16 mg, 0.2 mmol), 1.0 ml PhCl. Then amides (1 mmol) was added into the tube and capped with 20 mm microwave crimp caps with septa. The reaction mixture was stirred vigorously at room temperature for 3 mins and then put the vial approximately 4 cm away from the Blue LED lamp and then stirred overnight. After the completion of reaction, the product was determined by thin layer chromatography (TLC). The solvent was removed under vacuo, then the residue was purified by flash chromatography on silica gel to yield the desired product **3** or **5**.

### 1 mmol scale detailed method included for one-step transformations

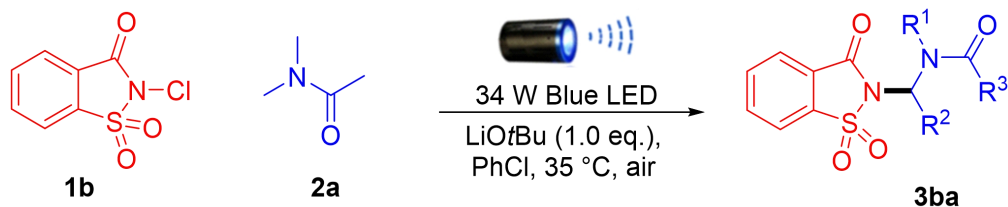

A 10 mL microwave vial was charged with *N*-chlorosaccharin (218 mg, 1 mmol), LiOtBu (80 mg, 1 mmol), 3.0 ml PhCl. Then *N,N*-dimethylacetamide (435 mg, 5 mmol) was added into the tube and capped with 20 mm microwave crimp caps with septa. The reaction mixture was stirred vigorously at room temperature for 3 mins and then put the vial approximately 4 cm away from the Blue LED lamp and stirred 24h. After the completion of reaction, the product was determined by thin layer



chromatography (TLC). The solvent was removed under vacuo, then the residue was purified by flash chromatography (ethyl acetate/dichloromethane=1/10 to 1/5) on silica gel to yield the desired product **3ba** (164 mg, 61 %).

### Full Table of Reaction Optimization

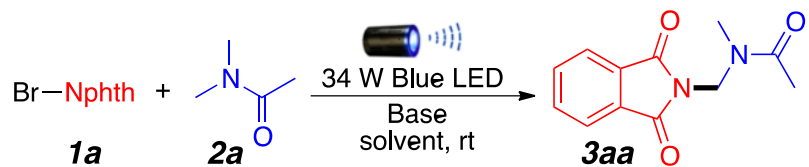

| Entry           | Base (equiv.) | Solvent (mL)             | Yield (%) <sup>b</sup> |
|-----------------|---------------|--------------------------|------------------------|
| 1               | LiOtBu (1.0)  | PhCF <sub>3</sub> (1.0)  | 42                     |
| 2               | LiOtBu (1.0)  | PhCl (1.0)               | 67 (65) <sup>c</sup>   |
| 3               | LiOtBu (1.0)  | CH <sub>3</sub> CN (1.0) | 10                     |
| 4               | LiOtBu (1.0)  | PhH (1.0)                | 49                     |
| 5               | NaOtBu (1.0)  | PhCl (1.0)               | 24                     |
| 6               | KOtBu (1.0)   | PhCl (1.0)               | 2                      |
| 7               | DBU (1.0)     | PhCl (1.0)               | 8                      |
| 8               | LiOtBu (1.0)  | PhCl (0.5)               | 53                     |
| 9               | LiOtBu (1.0)  | PhCl (0.75)              | 57                     |
| 10              | LiOtBu (1.0)  | PhCl (1.5)               | 62                     |
| 11              | LiOtBu (1.0)  | PhCl (2.0)               | 59                     |
| 12              | LiOtBu (1.0)  | PhCl (2.5)               | 54                     |
| 13              | LiOtBu (1.0)  | PhCl (3.0)               | 47                     |
| 14              | -             | PhCl (1.0)               | -                      |
| 15              | LiOtBu (0.75) | PhCl (1.0)               | 45                     |
| 16              | LiOtBu (1.25) | PhCl (1.0)               | 63                     |
| 17              | LiOtBu (1.5)  | PhCl (1.0)               | 35                     |
| 18              | LiOtBu (2.0)  | PhCl (1.0)               | 15                     |
| 19 <sup>d</sup> | LiOtBu (1.0)  | PhCl (1.0)               | 7                      |
| 20 <sup>e</sup> | LiOtBu (1.0)  | PhCl (1.0)               | 44                     |
| 21 <sup>f</sup> | LiOtBu (1.0)  | PhCl (1.0)               | 60                     |
| 22 <sup>g</sup> | LiOtBu (1.0)  | PhCl (1.0)               | 16                     |

*a.* Reaction conditions: **1a** (0.2 mmol, 1 eq.), **2a** (1.0 mmol, 5 eq.), base (1 eq.), solvent (1 mL), room temperature around reaction flask was 35 °C (heating caused by the LED lamp), reaction flask capped, overnight. *b.* <sup>1</sup>H-NMR yields using dibromomethane as internal standard. *c.* Isolated yield. *d.* The reaction performed at 60 °C without light. *e.* **2a** (2.5 eq.) was used instead of 5 eq. *f.* **2a** (4 eq.) was used instead of 5 eq. *g.* The reaction was performed by adding 20 μL of H<sub>2</sub>O.

### Additional Substrate Scope Explored for the Transformation

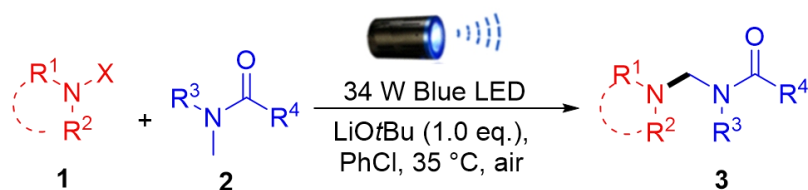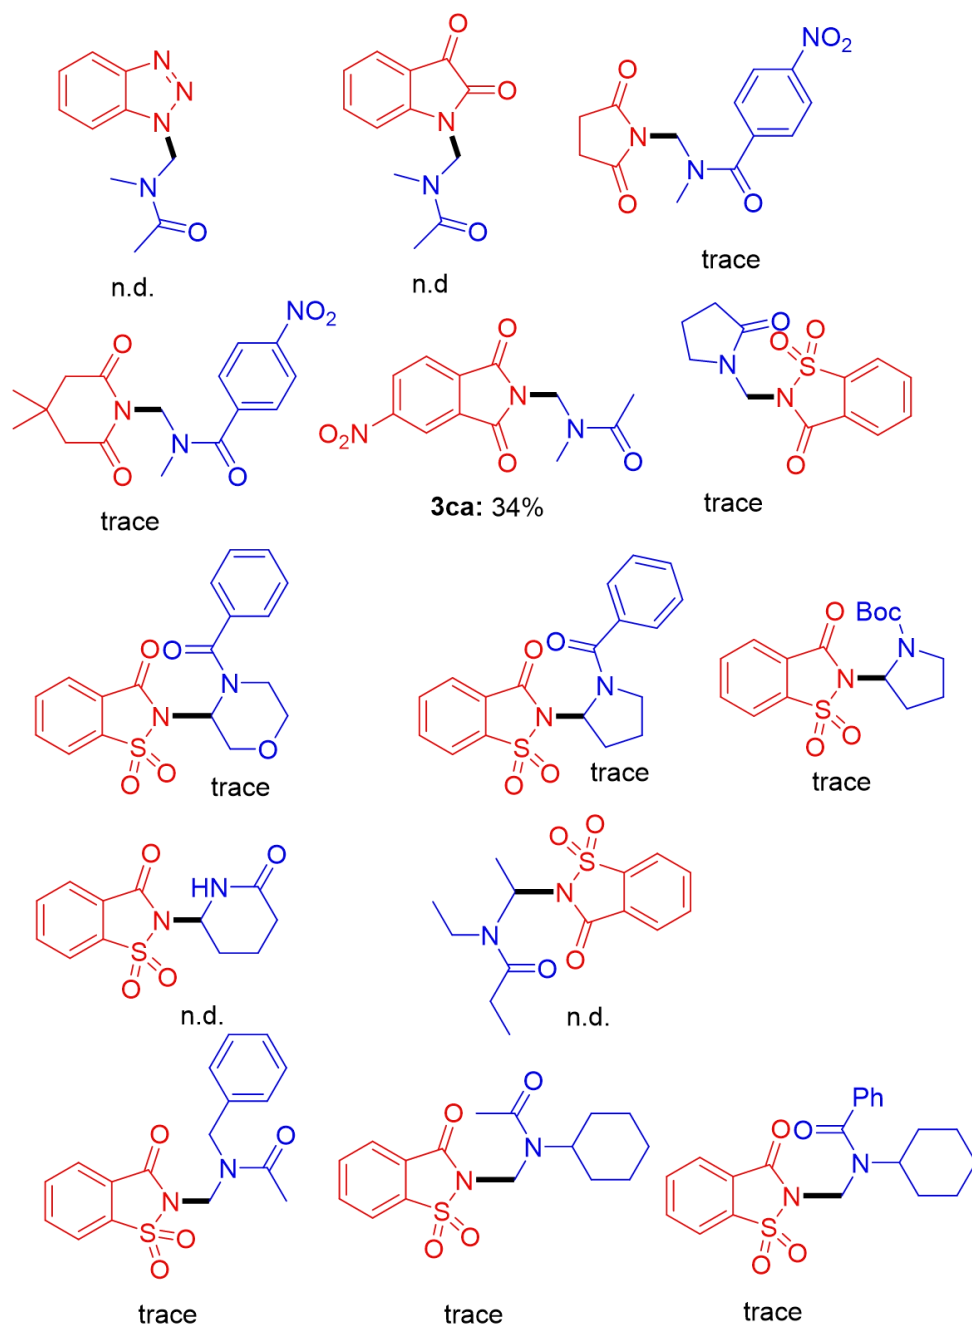

<sup>a</sup> Reaction conditions: **1** (0.2 mmol), **2** (1.0 mmol), LiOtBu (0.2 mmol), 1.0 ml PhCl, 35 °C (Heating caused by the LED lamp.), overnight. <sup>b</sup> Isolated yields. n.d. means no detected in TLC and NMR

## UV-vis Spectra

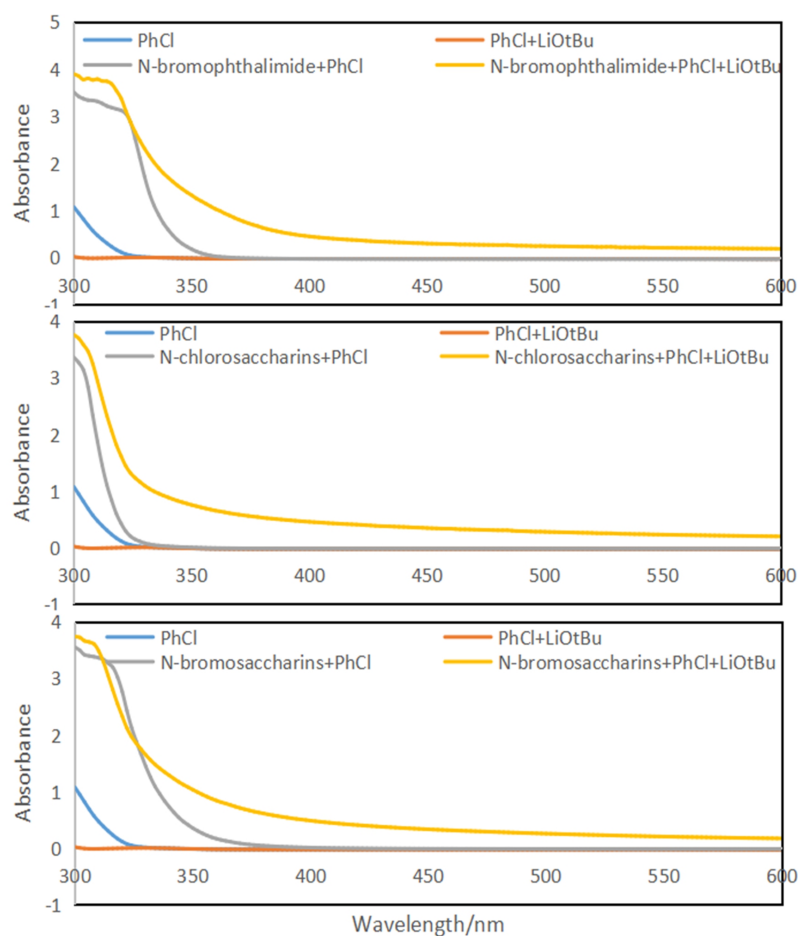

UV-vis spectroscopic measurements on various combination of **1a**, **1b** and lithium *tert*-butoxide in PhCl. Spectra taken with 0.04mmol of substrate in 2mL of PhCl; concentration 0.02mmol/mL.

To further understand the role played by LiOtBu, we performed a series of UV-vis spectroscopic measurements on various combinations of **1a**, **1b** and lithium *tert*-butoxide in PhCl (Figure above). The combination of *N*-haloimides, LiOtBu and PhCl (yellow line) showed an increased in absorption throughout all waves lengths, but also shows that this combination can absorb blue light (380–500 nm) while the other combinations of reagents (blue, red, and grey lines) do not show significant light absorbing property in the blue light wavelength in this test. This indicates that LiOtBu is interacting with the *N*-haloimide, possibly via halogen bonding,<sup>1</sup> and generates a halogen-bonded adduct capable of absorbing blue light to initiate the radical reaction.

<sup>1</sup> Weinberger, C.; Hines, R.; Zeller, M.; Rosokha, S. V. Continuum of Covalent to Intermolecular Bonding in the Halogen Bonded Complexes of 1,4-Diazabicyclo [2.2.2]octane with Bromine Containing Electrophiles. *Chem. Commun.* **2018**, *54*, 8060–8063.

## Calculated Energy Reaction Pathway

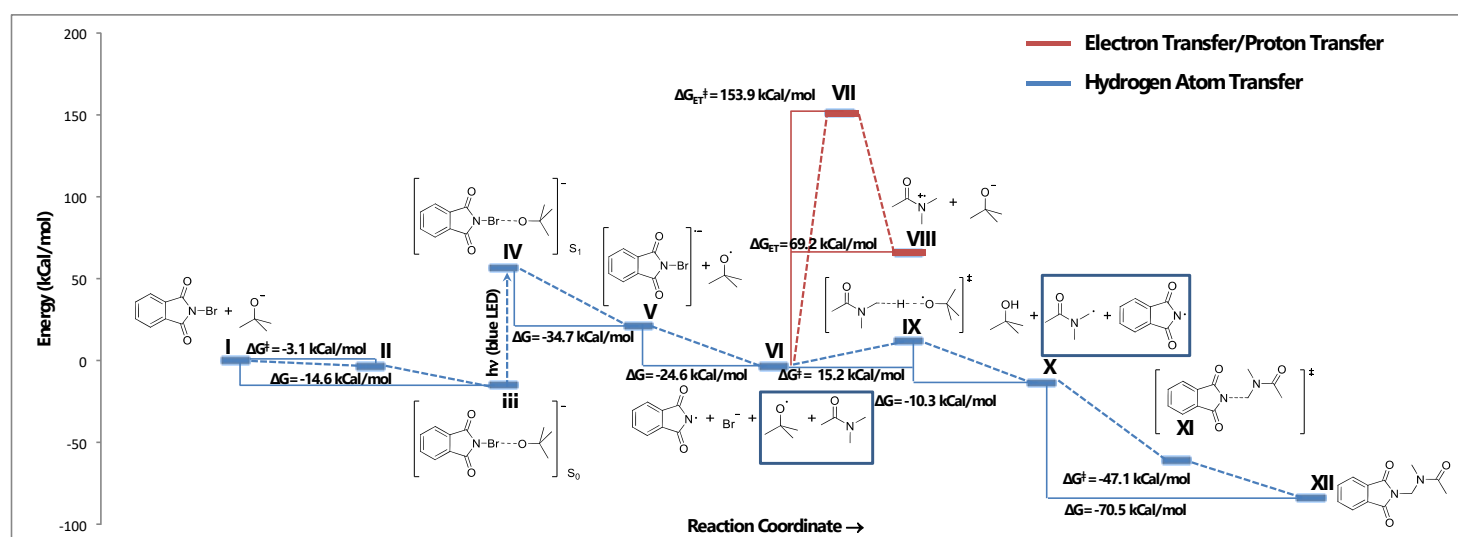

Energy reaction pathways (kCal/mol) of *N*-bromophthalimide **1a** with *tert*-butoxide through computational simulations using B3LYP/6-311+G(d,p)/MWB28 (Br) level of theory.

To further understand the process in which the reaction takes place, the energetic profile of the mechanism was explored through quantum calculations (Figure above, computational details can be found in S60). The formation of an electron-donor-acceptor (EDA) complex presents an exergonic energy profile (-14.6 kCal/mol), denoting that its formation is favored (I→III). The decomposition of the EDA complex to yield the radical anion is an endergonic process (36.1 kCal/mol) through conventional synthetic processes. However, through electronic excitation of the EDA complex (III→IV) this pathway becomes accessible, yielding *t*-BuO• and the radical anion B (IV→V) (see SI, S59). The latter is not stable and further decomposes to give the imidyl radical D and Br<sup>-</sup> (V→VI). On the other hand, the generation of *N,N*-dimethylacetamide radical (C) can follow two possible mechanistic pathways, hydrogen atom transfer (HAT) and electron transfer/proton transfer (ET/PT). The first one can be categorized as the synchronized abstraction of a proton and an electron in a one-step reaction, while the second one refers to a sequential process in which first occurs a single electron transfer to give a radical cation as intermediary followed by a posterior proton transfer.<sup>1</sup> Exploration of both mechanistic pathways reveals that the reaction follows a classic HAT mechanism (VI→X) since the ET/PT pathway (VI→VIII) is energetically hindered. Lastly, the radical-radical coupling between D and C to yield the desired product (**3aa**) displays an exergonic outline (X→XII).

1 Hancock, A.N.; Tanko, J.M. Radical cation/anion and neutral radicals: a comparison. In *Encyclopedia of Radicals in Chemistry, Biology and Materials*, John Wiley & Sons, Chichester, UK 2012.

## Analytical Data of Compounds

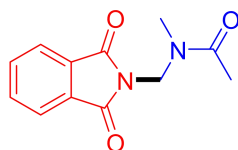

**3aa**

*N*-((1,3-dioxisoindolin-2-yl)methyl)-*N*-methylacetamide (**3aa**)<sup>4</sup> (mixture of rotamers)

Conditions: *N*-bromophthalimide (45 mg, 0.2 mmol), LiOtBu (16 mg, 0.2 mmol), 1.0 ml PhCl, *N,N*-dimethylacetamide (87 mg, 1 mmol), overnight. The product was isolated by flash chromatography (ethyl acetate/hexane= 1/1 to 3/1) as a white solid (30.2 mg, 65%).

<sup>1</sup>H NMR (400 MHz, CDCl<sub>3</sub>) δ 7.87 – 7.57 (m, 4H), 5.19 (d, *J* = 36.1 Hz, 2H), 2.95 (d, *J* = 64.3 Hz, 3H), 2.18 (d, *J* = 147.2 Hz, 3H).

<sup>13</sup>C NMR (101 MHz, CDCl<sub>3</sub>) δ 171.1 (s), 171.0(s), 167.8 (s), 167.6(s), 134.6 (s), 134.2 (s), 131.8 (s), 131.5 (s), 123.7 (s), 123.5 (s), 52.7 (s), 49.4 (s), 35.8 (s), 32.5 (s), 21.8 (s), 21.4 (s).

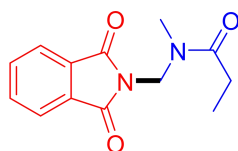

**3ab**

*N*-((1,3-dioxisoindolin-2-yl)methyl)-*N*-methylpropionamide (**3ab**)<sup>4</sup> (mixture of rotamers)

Conditions: *N*-bromophthalimide (45 mg, 0.2 mmol), LiOtBu (16 mg, 0.2 mmol), 1.0 ml PhCl, *N,N*-dimethylpropionamide (101 mg, 1 mmol), overnight.

The product was isolated by flash chromatography (ethyl acetate/hexane= 1/1 to 3/1) as a colorless oil (32.5 mg, 66%).

<sup>1</sup>H NMR (400 MHz, CDCl<sub>3</sub>) δ 7.91 – 7.81 (m, 2H), 7.80 – 7.67 (m, 2H), 5.27 (d, *J* = 34.7 Hz, 2H), 3.03 (d, *J* = 56.3 Hz, 3H), 2.55 (dq, *J* = 197.5, 7.3 Hz, 2H), 1.15 (dt, *J* = 28.9, 7.4 Hz, 3H).

<sup>13</sup>C NMR (101 MHz, CDCl<sub>3</sub>) δ 174.4 (s), 174.2 (s), 167.9 (s), 167.7(s), 134.6 (s), 134.2 (s), 131.9 (s), 131.6 (s), 123.8 (s), 123.6 (s), 51.8 (s), 50.1 (s), 35.2 (s), 32.8 (s), 26.8 (s), 26.0 (s), 9.4 (s), 8.8 (s).

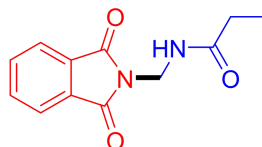

**3ac**

*N*-((1,3-dioxisoindolin-2-yl)methyl)propionamide (**3ac**)<sup>5</sup> (mixture of rotamers)

Conditions: *N*-bromophthalimide (45 mg, 0.2 mmol), LiOtBu (16 mg, 0.2 mmol), 1.0 ml PhCl, *N*-methylpropionamide (87 mg, 1 mmol), overnight. The product was isolated by flash chromatography (ethyl acetate/hexane= 1/1 to 3/1) as a white solid (20.9 mg, 45%).

<sup>1</sup>H NMR (400 MHz, CDCl<sub>3</sub>) δ 7.82 (dd, *J* = 5.4, 3.1 Hz, 2H), 7.70 (dd, *J* = 5.4, 3.1 Hz, 2H), 6.54 (s, 1H), 5.18 (d, *J* = 6.5 Hz, 2H), 2.20 (q, *J* = 7.6 Hz, 2H), 1.11 (t, *J* = 7.6 Hz, 3H).

<sup>13</sup>C NMR (101 MHz, CDCl<sub>3</sub>) δ 173.4 (s), 167.5 (s), 134.3 (s), 131.9 (s), 123.6 (s), 42.5 (s), 29.3 (s), 9.3 (s).

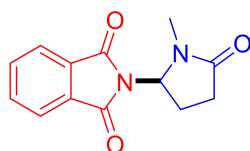

**3ad**

2-(1-methyl-5-oxopyrrolidin-2-yl)isoindoline-1,3-dione (**3ad**)<sup>4</sup> (mixture of rotamers)

Conditions: *N*-bromophthalimide (45 mg, 0.2 mmol), LiOtBu (16 mg, 0.2 mmol), 1.0 ml PhCl, 1-methylpyrrolidin-2-one (99 mg, 1 mmol), overnight. The product was isolated by flash chromatography (ethyl acetate/hexane= 1/1 to 3/1) as a white solid (25.9 mg, 53%).

<sup>1</sup>H NMR (400 MHz, CDCl<sub>3</sub>) δ 7.89 – 7.67 (m, 4H), 5.78 (dd, *J* = 8.9, 1.5 Hz, 1H), 3.04 – 2.90 (m, 1H), 2.70 (s, 3H), 2.59 – 2.37 (m, 2H), 2.27 (ddd, *J* = 13.1, 7.7, 2.1 Hz, 1H).

<sup>13</sup>C NMR (101 MHz, CDCl<sub>3</sub>) δ 175.3 (s), 167.4 (s), 134.6 (s), 131.5 (s), 123.7 (s), 65.7 (s), 29.6 (s), 27.1 (s), 23.2 (s).

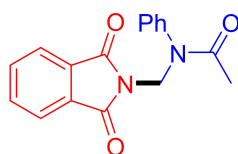

**3ae**

*N*-((1,3-dioxisoindolin-2-yl)methyl)-*N*-phenylacetamide (**3ae**) (mixture of rotamers)

Conditions: *N*-bromophthalimide (45 mg, 0.2 mmol), LiOtBu (16 mg, 0.2 mmol), 1.0 ml PhCl, *N*-methyl-*N*-phenylacetamide (149 mg, 1 mmol), overnight. The product was isolated by flash chromatography (ethyl acetate/hexane= 1/1 to 3/1) as a white solid (27.7 mg, 47%). m.p: 143-146 °C

<sup>1</sup>H NMR (400 MHz, CDCl<sub>3</sub>) δ 7.77 (m, 2H), 7.73 – 7.64 (m, 2H), 7.37 – 7.28 (m, 3H), 7.15 (d, *J* = 6.6 Hz, 2H), 5.66 (s, 2H), 1.83 (d, *J* = 6.5 Hz, 3H).

<sup>13</sup>C NMR (101 MHz, CDCl<sub>3</sub>) δ 170.5 (s), 167.1 (s), 140.4 (s), 134.2 (s), 131.6 (s), 129.8 (s), 128.6 (2C), 123.6 (s), 49.7 (s), 22.8 (s).

HRMS (ESI) *m/z*: [M+H]<sup>+</sup> calcd for C<sub>17</sub>H<sub>15</sub>N<sub>2</sub>O<sub>3</sub> 295.1077 ; found 295.1077.

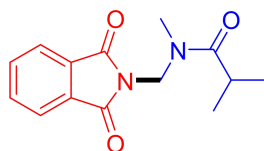

**3af**

*N*-((1,3-dioxisoindolin-2-yl)methyl)-*N*-methylisobutyramide (**3af**) (mixture of rotamers)

Conditions: *N*-bromophthalimide (45 mg, 0.2 mmol), LiOtBu (16 mg, 0.2 mmol), 1.0 ml PhCl, *N,N*-dimethylisobutyramide (115 mg, 1 mmol), overnight. The product was isolated by flash chromatography (ethyl acetate/hexane= 1/1 to 3/1) as a pale yellow solid (25.0 mg, 48%).

<sup>1</sup>H NMR (400 MHz, CDCl<sub>3</sub>) δ 7.90 – 7.65 (m, 4H), 5.27 (d, *J* = 14.6 Hz, 2H), 3.54 – 2.61 (dt, *J* = 13.1, 6.5 Hz, 1H), 3.04 (d, *J* = 79.8 Hz, 3H), 1.12 (dd, *J* = 33.6, 6.6 Hz, 6H).

<sup>13</sup>C NMR (101 MHz, CDCl<sub>3</sub>) δ 178.0 (s), 177.4 (s), 167.9(s), 167.6 (s), 134.6 (s), 134.2 (s), 131.9 (s), 131.6 (s), 123.8 (s), 123.6 (s), 51.7 (s), 50.47 (s), 35.2 (s), 33.1 (s), 30.7 (s), 29.9 (s), 19.9 (s), 19.0 (s).

HRMS (ESI) *m/z*: [M+Na]<sup>+</sup> calcd for C<sub>14</sub>H<sub>16</sub>N<sub>2</sub>NaO<sub>3</sub> 283.1053; found 283.1041.

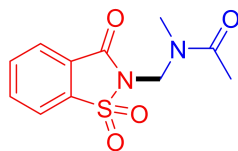

**3ba**

*N*-((1,1-dioxido-3-oxobenzo[d]isothiazol-2(3H)-yl)methyl)-*N*-methylacetamide (**3ba**) (mixture of rotamers)

Conditions: *N*-chlorosaccharin (44 mg, 0.2 mmol) or *N*-bromosaccharin(52 mg,0.2 mmol), LiOtBu (16mg, 0.2 mmol), 1.0 ml PhCl, *N,N*-dimethylacetamide (87 mg, 1 mmol), overnight. The product was isolated by flash chromatography (ethyl acetate/dichloromethane=1/10 to 1/3) as a colorless oil (33.8 mg, 63% (X=Cl), 27.4 mg, 51%(X=Br)).

<sup>1</sup>H NMR (400 MHz, CDCl<sub>3</sub>) δ 8.07 – 7.99 (m, 1H), 7.96 – 7.76 (m, 3H), 5.40 (d, *J* = 51.6 Hz, 2H), 3.03 (d, *J* = 38.3 Hz, 3H), 2.23 (d, *J* = 108.9 Hz, 3H).

<sup>13</sup>C NMR (101 MHz, CDCl<sub>3</sub>) δ 170.8 (s), 169.9 (s), 158.3 (s), 158.1 (s), 136.9 (s), 136.4 (s), 134.6 (s), 134.3 (s), 133.8 (s), 133.4 (s), 125.6 (s), 124.6 (s), 124.4 (s), 120.3 (s), 120.1 (s), 53.7 (s), 49.2 (s), 34.1 (s), 31.7 (s), 20.7 (s), 20.5 (s).

HRMS (ESI) *m/z*: [M+K]<sup>+</sup> calcd for C<sub>11</sub>H<sub>12</sub>KN<sub>2</sub>O<sub>4</sub>S 307.0149; found 307.0142.

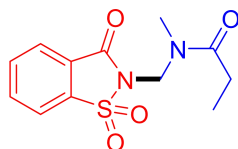

**3bb**

*N*-((1,1-dioxido-3-oxobenzo[d]isothiazol-2(3H)-yl)methyl)-*N*-methylpropionamide (**3bb**) (mixture of rotamers)

Conditions: *N*-chlorosaccharin (44 mg, 0.2 mmol) or *N*-bromosaccharin(52 mg,0.2 mmol), LiOtBu (16mg, 0.2 mmol), 1.0 ml PhCl, *N,N*-dimethylpropionamide (101 mg, 1 mmol), overnight. The product was isolated by flash chromatography (ethyl acetate/dichloromethane=1/10 to 1/3) as a pale yellow oil (40.66 mg, 72%(X=Cl), 28.8 mg, 51%(X=Br)).

<sup>1</sup>H NMR (400 MHz, CDCl<sub>3</sub>) δ 8.09 – 8.02 (m, 1H), 7.97 – 7.79 (m, 3H), 5.43 (d, *J* = 52.7 Hz, 2H), 3.06 (d, *J* = 29.9 Hz, 3H), 2.52 (dq, *J* = 136.3, 7.3 Hz, 2H), 1.23 – 1.04 (m, 3H).

<sup>13</sup>C NMR (101 MHz, CDCl<sub>3</sub>) δ 173.8 (s), 173.1 (s), 158.2 (s), 158.1 (s), 136.9 (s), 136.5 (s), 134.5 (s), 134.2 (s), 133.8 (s), 133.4 (s), 125.7 (s), 124.6 (s), 124.4 (s), 120.2 (s), 120.0 (s), 52.8 (s), 49.7 (s), 33.4 (s), 32.0 (s), 25.65 (s), 25.2 (s), 8.4 (s), 7.8 (s).

HRMS (ESI) *m/z*: [M+H]<sup>+</sup> calcd for C<sub>12</sub>H<sub>15</sub>N<sub>2</sub>O<sub>4</sub>S 283.0747; found 283.0752.

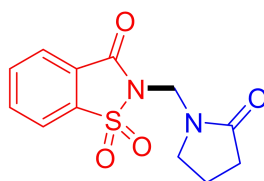

**3bd'**

2-((2-oxopyrrolidin-1-yl)methyl)benzo[d]isothiazol-3(2H)-one 1,1-dioxide (**3bd**) (mixture of rotamers)

Conditions: *N*-chlorosaccharin (44 mg, 0.2 mmol) or *N*-bromosaccharin(52 mg, 0.2 mmol), LiO*t*Bu (16mg, 0.2 mmol), 1.0 ml PhCl, 1-methylpyrrolidin-2-one (99 mg, 1 mmol), overnight. The product was isolated by flash chromatography (ethyl acetate/dichloromethane=1/10 to 1/3) as a yellow oil (5.0 mg, 9%(X=Cl), 5.6 mg, 10%(X=Br)).

<sup>1</sup>H NMR (400 MHz, CDCl<sub>3</sub>) δ 8.07 (d, *J* = 7.3 Hz, 1H), 7.96 – 7.81 (m, 3H), 5.36 (s, 2H), 3.50 (t, *J* = 7.0 Hz, 2H), 2.40 (t, *J* = 8.1 Hz, 2H), 2.09 – 1.97 (m, 2H).

<sup>13</sup>C NMR (101 MHz, CDCl<sub>3</sub>) δ 175.8 (s), 158.2 (s), 137.8 (s), 135.4 (s), 134.5 (s), 126.7 (s), 125.5 (s), 121.2 (s), 46.0 (s), 45.9 (s), 30.4 (s), 17.9 (s).

HRMS (ESI) *m/z*: [M+H]<sup>+</sup> calcd for C<sub>12</sub>H<sub>13</sub>N<sub>2</sub>O<sub>4</sub>S 281.0591; found 281.0597.

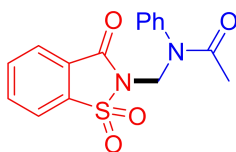

**3be**

*N*-((1,1-dioxido-3-oxobenzo[d]isothiazol-2(3H)-yl)methyl)-*N*-phenylacetamide (**3be**) (mixture of rotamers)

Conditions: *N*-chlorosaccharin (44 mg, 0.2 mmol) or *N*-bromosaccharin(52 mg, 0.2 mmol), LiO*t*Bu (16mg, 0.2 mmol), 1.0 ml PhCl, *N*-methyl-*N*-phenylacetamide (149 mg, 1 mmol), overnight. The product was isolated by flash chromatography (ethyl acetate/dichloromethane=1/10 to 1/3) as a white solid (42.3 mg, 64%(X=Cl), 27.8 mg, 42%(X=Br)). m.p.: 182-185 °C

<sup>1</sup>H NMR (400 MHz, CDCl<sub>3</sub>) δ 7.91 – 7.68 (m, 4H), 7.36 – 7.16 (m, 5H), 5.76 (s, 2H), 1.83 (s, 3H).

<sup>13</sup>C NMR (101 MHz, CDCl<sub>3</sub>) δ 171.1 (s), 158.4 (s), 140.5 (s), 138.0 (s), 135.2 (s), 134.3 (s), 129.9 (s), 128.8 (s), 128.5 (s), 126.4 (s), 125.5 (s), 121.1 (s), 50.3 (s), 22.5 (s).

HRMS (ESI) *m/z*: [M+H]<sup>+</sup> calcd for C<sub>16</sub>H<sub>15</sub>N<sub>2</sub>O<sub>4</sub>S 331.0747; found 331.0747.

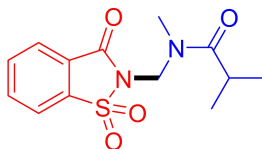

**3bf**

*N*-((1,1-dioxido-3-oxobenzo[d]isothiazol-2(3H)-yl)methyl)-*N*-methylisobutyramide (**3bf**) (mixture of rotamers)

Conditions: *N*-chlorosaccharin (44 mg, 0.2 mmol) or *N*-bromosaccharin(52 mg, 0.2 mmol), LiO*t*Bu (16mg, 0.2 mmol), 1.0 ml PhCl, *N,N*-dimethylisobutyramide (115 mg, 1 mmol), overnight. The product was isolated by flash chromatography (ethyl acetate/dichloromethane=1/10 to 1/3) as a pale yellow oil (40.9 mg, 69%(X=Cl), 31.4 mg, 53%(X=Br)).

<sup>1</sup>H NMR (400 MHz, CDCl<sub>3</sub>) δ 8.12 – 8.03 (m, 1H), 7.99 – 7.75 (m, 3H), 5.47 (d, *J* = 41.4 Hz, 2H), 3.30-2.80 (dt, *J* = 13.4, 6.7 Hz, 1H), 3.10 (d, *J* = 52.1 Hz, 3H), 1.18 (dd, *J* = 22.9, 6.5 Hz, 6H).

<sup>13</sup>C NMR (101 MHz, CDCl<sub>3</sub>) δ 177.97 (s), 159.24 (s), 138.00 (s), 135.50 (s), 135.18 (s), 134.72 (s), 134.31 (s), 126.74 (s), 125.66 (s), 125.44 (s), 121.20 (s), 121.02 (s), 53.70 (s), 50.94 (s), 34.37 (s), 33.18 (s), 30.51 (s), 29.69 (s), 19.76 (s), 18.84 (s).



HRMS (ESI) m/z:  $[M+H]^+$  calcd for  $C_{13}H_{17}N_2O_4S$  297.0904; found 297.0889.

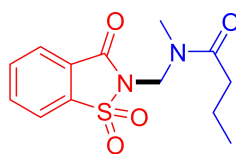

**3bg**

*N*-((1,1-dioxido-3-oxobenzo[d]isothiazol-2(3H)-yl)methyl)-*N*-methylbutyramide (**3bg**) (mixture of rotamers)

Conditions: *N*-chlorosaccharin (44 mg, 0.2 mmol) or *N*-bromosaccharin (52 mg, 0.2 mmol), LiOtBu (16mg, 0.2 mmol), 1.0 ml PhCl, *N,N*-dimethylbutyramide (1 mmol), overnight. The product was isolated by flash chromatography (ethyl acetate/dichloromethane=1/10 to 1/3) as a pale yellow solid (37.3 mg, 63%(X=Cl), 36.1 mg, 61%(X=Br)).

$^1H$  NMR (400 MHz,  $CDCl_3$ )  $\delta$  8.11 – 8.03 (m, 1H), 7.97 – 7.79 (m, 3H), 5.45 (d,  $J = 51.7$  Hz, 2H), 3.20 – 2.95 (m, 3H), 2.48 (dt,  $J = 134.7, 7.4$  Hz, 2H), 1.70 (dp,  $J = 14.8, 7.5$  Hz, 2H), 0.97 (dt,  $J = 14.9, 7.4$  Hz, 3H).

$^{13}C$  NMR (101 MHz,  $CDCl_3$ )  $\delta$  173.0 (s), 172.3 (s), 158.3 (s), 158.1 (s), 137.0 (s), 136.5 (s), 134.5 (s), 134.2 (s), 133.7 (s), 133.3 (s), 130.5 (s), 128.2 (s), 125.7 (s), 124.6 (s), 124.4 (s), 120.2 (s), 120.0 (s), 34.2 (s), 33.7 (s), 33.5 (s), 31.9 (s), 17.6 (s), 17.0 (s), 12.9 (s), 128.8 (s).

HRMS (ESI) m/z:  $[M+H]^+$  calcd for  $C_{13}H_{17}N_2O_4S$  297.0904; found 297.0889.

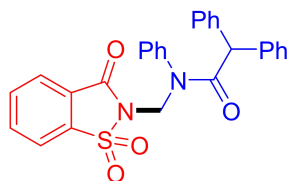

**3bh**

*N*-((1,1-dioxido-3-oxobenzo[d]isothiazol-2(3H)-yl)methyl)-*N*,2,2-triphenylacetamide (**3bh**) (mixture of rotamers)

Conditions: *N*-chlorosaccharin (44 mg, 0.2 mmol) or *N*-bromosaccharin (52 mg, 0.2 mmol), LiOtBu (16mg, 0.2 mmol), 1.0 ml PhCl, *N*-methyl-*N*,2,2-triphenylacetamide (301 mg, 1 mmol), overnight. The product was isolated by flash chromatography (ethyl acetate/dichloromethane=1/10 to 1/3) as a white solid (47.2 mg, 49%(X=Cl), 31.8 mg, 33%(X=Br)). m.p: 156-159 °C

$^1H$  NMR (400 MHz,  $CDCl_3$ )  $\delta$  7.85 – 7.62 (m, 4H), 7.32 – 7.20 (m, 3H), 7.19 – 7.01 (m, 12H), 5.77 (s, 2H), 4.83 (s, 1H).

$^{13}C$  NMR (101 MHz,  $CDCl_3$ )  $\delta$  172.4 (s), 158.5 (s), 139.7 (s), 139.1 (s), 138.0 (s), 135.2 (s), 134.3 (s), 129.8 (s), 129.1 (s), 129.0 (s), 129.0 (s), 128.4 (s), 127.0 (s), 126.4 (s), 125.5 (s), 121.1 (s), 54.7 (s), 50.9 (s).

HRMS (ESI) m/z:  $[M+H]^+$  calcd for  $C_{28}H_{23}N_2O_4S$  483.1373; found 483.1373.

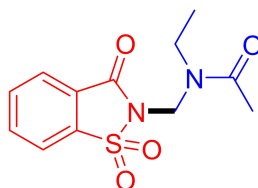

**3bi**

*N*-((1,1-dioxido-3-oxobenzo[d]isothiazol-2(3H)-yl)methyl)-*N*-ethylacetamide (**3bi**) (mixture of rotamers)

Conditions: *N*-chlorosaccharin (44 mg, 0.2 mmol) or *N*-bromosaccharin(52 mg, 0.2 mmol), LiO*t*Bu (16mg, 0.2 mmol), 1.0 ml PhCl, *N*-ethyl-*N*-methylacetamide (101 mg, 1 mmol), overnight. The product was isolated by flash chromatography (ethyl acetate/dichloromethane=1/10 to 1/3) as a pale yellow oil (25.4 mg, 45%(X=Cl), 20.9 mg, 37%(X=Br)).

<sup>1</sup>H NMR (400 MHz, CDCl<sub>3</sub>) δ 8.11 – 8.02 (m, 1H), 7.88 (m, 3H), 5.42 (d, *J* = 60.3 Hz, 2H), 3.50 (dq, *J* = 21.4, 7.1 Hz, 2H), 2.27 (d, *J* = 93.8 Hz, 3H), 1.20 (dt, *J* = 38.8, 7.1 Hz, 3H).

<sup>13</sup>C NMR (101 MHz, CDCl<sub>3</sub>) δ 171.3 (s), 170.3 (s), 159.5 (s), 159.2 (s), 138.1 (s), 137.6 (s), 135.5 (s), 135.3 (s), 134.8 (s), 134.3 (s), 126.6 (s), 126.6 (s), 125.6 (s), 125.4 (s), 121.3 (s), 125.1 (s), 52.6 (s), 48.0 (s), 42.2 (s), 39.7 (s), 21.9 (s), 21.2 (s), 14.00 (s), 12.6 (s).

HRMS (ESI) *m/z*: [M+H]<sup>+</sup> calcd for C<sub>12</sub>H<sub>15</sub>N<sub>2</sub>O<sub>4</sub>S 283.0747; found 283.0752.

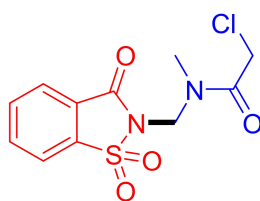

**3bi**

2-chloro-*N*-((1,1-dioxido-3-oxobenzo[d]isothiazol-2(3H)-yl)methyl)-*N*-methylacetamide (**3bj**) (mixture of rotamers)

Conditions: *N*-chlorosaccharin (44 mg, 0.2 mmol) or *N*-bromosaccharin(52 mg, 0.2 mmol), LiO*t*Bu (16mg, 0.2 mmol), 1.0 ml PhCl, 2-chloro-*N,N*-dimethylacetamide (122 mg, 1 mmol), overnight. The product was isolated by flash chromatography (ethyl acetate/dichloromethane=1/10 to 1/3) as a pale yellow solid (24.8 mg, 41%(X=Cl), 26.0 mg, 43%(X=Br)).

<sup>1</sup>H NMR (400 MHz, CDCl<sub>3</sub>) δ 8.13 – 8.06 (m, 1H), 8.02 – 7.81 (m, 3H), 5.47 (d, *J* = 38.8 Hz, 2H), 4.31 (d, *J* = 153.9 Hz, 2H), 3.15 (d, *J* = 49.2 Hz, 3H).

<sup>13</sup>C NMR (101 MHz, CDCl<sub>3</sub>) δ 167.4 (s), 159.2 (s), 137.9 (s), 137.4 (s), 135.7 (s), 135.4 (s), 134.9 (s), 134.5 (s), 126.6 (s), 125.8 (s), 125.6 (s), 121.4 (s), 121.2 (s), 54.03.95 (s), 50.8 (s), 41.0 (s), 40.9 (s), 34.7 (s), 33.6 (s).

HRMS (ESI) *m/z*: [M+K]<sup>+</sup> calcd for C<sub>11</sub>H<sub>11</sub>ClKN<sub>2</sub>O<sub>4</sub>S 340.9760; found 340.9764.

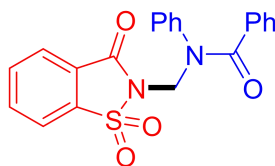

**3bk**

*N*-((1,1-dioxido-3-oxobenzo[d]isothiazol-2(3H)-yl)methyl)-*N*-phenylbenzamide (**3bk**) (mixture of rotamers)

Conditions: *N*-chlorosaccharin (44 mg, 0.2 mmol) or *N*-bromosaccharin(52 mg, 0.2 mmol), LiO*t*Bu (16mg, 0.2 mmol), 1.0 ml PhCl, *N*-methyl-*N*-phenylbenzamide (211mg, 1 mmol), overnight. The product was isolated by flash chromatography (ethyl acetate/dichloromethane=1/10 to 1/3) as a pale yellow solid (33.0 mg, 42%(X=Cl), 10.2 mg, 13%(X=Br)). m.p: 205-208 °C

$^1\text{H}$  NMR (400 MHz,  $\text{CDCl}_3$ )  $\delta$  7.94 (d,  $J = 7.8$  Hz, 2H), 7.86 (t,  $J = 7.6$  Hz, 1H), 7.78 (t,  $J = 7.5$  Hz, 1H), 7.38 (d,  $J = 7.3$  Hz, 2H), 7.19 (m, 8H), 6.04 (s, 2H).

$^{13}\text{C}$  NMR (101 MHz,  $\text{CDCl}_3$ )  $\delta$  171.0 (s), 158.5 (s), 141.0 (s), 138.0 (s), 135.2 (s), 134.8 (s), 134.2 (s), 130.1 (s), 129.3 (s), 128.9 (s), 128.3 (s), 127.7 (s), 127.6 (s), 126.4 (s), 125.5 (s), 121.0 (s), 52.0 (s).

HRMS (ESI)  $m/z$ :  $[\text{M}+\text{Na}]^+$  calcd for  $\text{C}_{21}\text{H}_{16}\text{N}_2\text{NaO}_4\text{S}$  415.0723; found 415.0726.

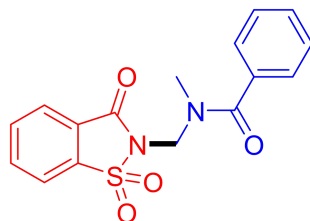

**3bl**

*N*-((1,1-dioxido-3-oxobenzo[d]isothiazol-2(3H)-yl)methyl)-*N*-methylbenzamide (**3bl**) (mixture of rotamers)

Conditions: *N*-chlorosaccharin (44 mg, 0.2 mmol) or *N*-bromosaccharin (52 mg, 0.2 mmol),  $\text{LiO}t\text{Bu}$  (16mg, 0.2 mmol), 1.0 ml  $\text{PhCl}$ , *N,N*-dimethylbenzamide (149 mg, 1 mmol), overnight. The product was isolated by flash chromatography (ethyl acetate/dichloromethane=1/10 to 1/3) as a pale yellow oil (41.6 mg, 63%(X=Cl), 33.7 mg, 51%(X=Br)).

$^1\text{H}$  NMR (400 MHz,  $\text{CDCl}_3$ )  $\delta$  8.05 (d,  $J = 7.0$  Hz, 1H), 7.96 – 7.78 (m, 3H), 7.45 (d,  $J = 30.7$  Hz, 5H), 5.55 (d,  $J = 101.1$  Hz, 2H), 3.06 (s, 3H).

$^{13}\text{C}$  NMR (101 MHz,  $\text{CDCl}_3$ )  $\delta$  172.3 (s), 159.1 (s), 137.8 (s), 135.5 (s), 135.1 (s), 134.6 (s), 130.2 (s), 128.5 (s), 127.3 (s), 126.6 (s), 125.5 (s), 121.1 (s), 50.6 (s), 36.5 (s).

HRMS (ESI)  $m/z$ :  $[\text{M}+\text{H}]^+$  calcd for  $\text{C}_{16}\text{H}_{15}\text{N}_2\text{O}_4\text{S}$  331.0747; found 331.0747.

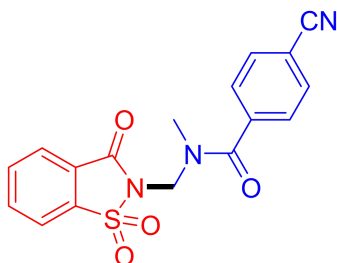

**3bm**

4-cyano-*N*-((1,1-dioxido-3-oxobenzo[d]isothiazol-2(3H)-yl)methyl)-*N*-methylbenzamide (**3bm**) (mixture of rotamers)

Conditions: *N*-chlorosaccharin (44 mg, 0.2 mmol) or *N*-bromosaccharin (52 mg, 0.2 mmol),  $\text{LiO}t\text{Bu}$  (16mg, 0.2 mmol), 1.0 ml  $\text{PhCl}$ , 4-cyano-*N,N*-dimethylbenzamide (174 mg, 1 mmol), overnight.

The product was isolated by flash chromatography (ethyl acetate/dichloromethane=1/10 to 1/3) as a white solid (39.1 mg, 55%(X=Cl), 45.5 mg, 64%(X=Br)). m.p: 179-181 °C

$^1\text{H}$  NMR (400 MHz,  $\text{CDCl}_3$ )  $\delta$  8.22 – 7.39 (m, 8H), 5.44 (d,  $J = 157.9$  Hz, 2H), 3.01 (d,  $J = 45.2$  Hz, 3H).

$^{13}\text{C}$  NMR (101 MHz,  $\text{CDCl}_3$ )  $\delta$  170.3 (s), 159.0 (s), 139.4 (s), 137.8 (s), 135.5 (s), 134.7 (s), 132.4 (s), 127.8 (s), 126.5 (s), 125.7 (s), 121.2 (s), 118.1 (s), 114.0 (s), 50.2 (s), 36.3 (s).

HRMS (ESI)  $m/z$ :  $[\text{M}+\text{H}]^+$  calcd for  $\text{C}_{17}\text{H}_{14}\text{N}_3\text{O}_4\text{S}$  356.0700; found 356.0699.

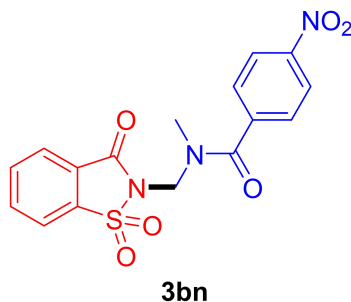

*N*-((1,1-dioxido-3-oxobenzo[d]isothiazol-2(3H)-yl)methyl)-*N*-methyl-4-nitrobenzamide (**3bn**) (mixture of rotamers)

Conditions: *N*-chlorosaccharin (44 mg, 0.2 mmol) or *N*-bromosaccharin(52 mg, 0.2 mmol), LiOtBu (16mg, 0.2 mmol), 1.0 ml PhCl, *N,N*-dimethyl-4-nitrobenzamide (194 mg, 1 mmol), overnight.

The product was isolated by flash chromatography (ethyl acetate/dichloromethane=1/10 to 1/3) as a white solid (54.1 mg, 72%(X=Cl), 47.3 mg, 63%(X=Br)). m.p: 127-129 °C

<sup>1</sup>H NMR (400 MHz, CDCl<sub>3</sub>) δ 8.38 – 7.54 (m, 8H), 5.50 (d, *J* = 156.1 Hz, 2H), 3.07 (d, *J* = 49.9 Hz, 3H).

<sup>13</sup>C NMR (101 MHz, CDCl<sub>3</sub>) δ 170.0 (s), 159.0 (s), 148.7 (s), 141.2 (s), 137.8 (s), 135.6 (s), 134.7 (s), 128.9 (s), 128.1 (s), 126.5 (s), 125.7 (s), 123.9 (s), 121.2 (s), 54.6 (s), 50.1 (s), 36.3 (s), 32.2 (s).

HRMS (ESI) *m/z*: [M+H]<sup>+</sup> calcd for C<sub>16</sub>H<sub>14</sub>N<sub>3</sub>O<sub>6</sub>S 376.0598; found 376.0585.

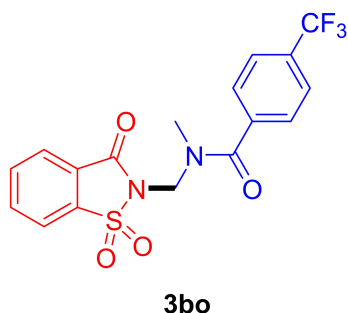

*N*-((1,1-dioxido-3-oxobenzo[d]isothiazol-2(3H)-yl)methyl)-*N*-methyl-4-(trifluoromethyl)benzamide (**3bo**) (mixture of rotamers)

Conditions: *N*-chlorosaccharin (44 mg, 0.2 mmol) or *N*-bromosaccharin(52 mg, 0.2 mmol), LiOtBu (16mg, 0.2 mmol), 1.0 ml PhCl, *N,N*-dimethyl-4-(trifluoromethyl)benzamide (217 mg, 1 mmol), overnight. The product was isolated by flash chromatography (ethyl acetate/dichloromethane=1/10 to 1/3) as a white solid (59.8 mg, 75%(X=Cl), 64.6 mg, 81%(X=Br)).

<sup>1</sup>H NMR (400 MHz, CDCl<sub>3</sub>) δ 8.07 (s, 1H), 7.99 – 7.81 (m, 3H), 7.64 (d, *J* = 27.8 Hz, 4H), 5.52 (d, *J* = 146.0 Hz, 2H), 3.02 (s, 3H).

<sup>13</sup>C NMR (101 MHz, CDCl<sub>3</sub>) δ 170.84 (s), 159.03 (s), 138.66 (s), 137.75 (s), 135.50 (s), 134.61 (s), 132.00 (q, *J* = 32.7 Hz), 127.87 – 127.34 (m), 126.52 (s), 125.61 (s), 125.56 (s), 123.71 (q, *J* = 271 Hz), 121.15 (s), 54.76 (s), 50.22 (s), 36.32 (s), 31.89 (s).

<sup>19</sup>F NMR (377 MHz, CDCl<sub>3</sub>) δ -62.91 (s).

HRMS (ESI) *m/z*: [M+H]<sup>+</sup> calcd for C<sub>17</sub>H<sub>14</sub>F<sub>3</sub>N<sub>2</sub>O<sub>4</sub>S 399.0621; found 399.0609.

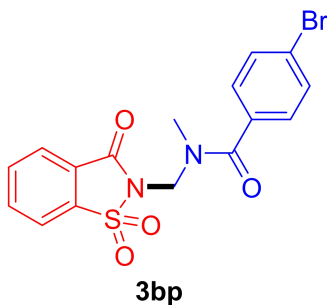

4-bromo-*N*-((1,1-dioxido-3-oxobenzo[d]isothiazol-2(3H)-yl)methyl)-*N*-methylbenzamide (3bp)  
(mixture of rotamers)

Conditions: *N*-chlorosaccharin (44 mg, 0.2 mmol) or *N*-bromosaccharin(52 mg, 0.2 mmol), LiO*t*Bu (16mg, 0.2 mmol), 1.0 ml PhCl, 4-bromo-*N,N*-dimethylbenzamide (228 mg, 1 mmol), overnight. The product was isolated by flash chromatography (ethyl acetate/dichloromethane=1/10 to 1/3) as a white solid (59.8 mg, 73%(X=Cl), 41.7 mg, 51%(X=Br)).

<sup>1</sup>H NMR (400 MHz, CDCl<sub>3</sub>) δ 8.07 (d, *J* = 7.2 Hz, 1H), 7.99 – 7.79 (m, 3H), 7.56 (d, *J* = 6.8 Hz, 2H), 7.39 (s, 2H), 5.66 (s, 2H), 3.06 (s, 3H).

<sup>13</sup>C NMR (101 MHz, CDCl<sub>3</sub>) δ 171.3 (s), 159.0 (s), 137.8 (s), 135.4 (s), 134.6 (s), 133.9 (s), 131.7 (s), 129.1 (s), 126.6 (s), 125.6 (s), 124.6 (s), 121.1 (s), 50.4 (s), 36.5 (s).

HRMS (ESI) *m/z*: [M+H]<sup>+</sup> calcd for C<sub>16</sub>H<sub>14</sub>BrN<sub>2</sub>O<sub>4</sub>S 408.9852; found 408.9857.

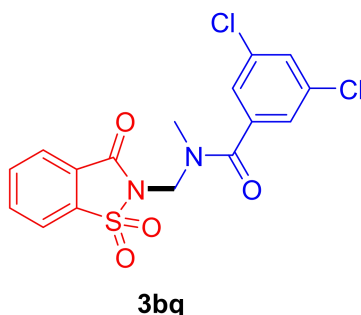

3,5-dichloro-*N*-((1,1-dioxido-3-oxobenzo[d]isothiazol-2(3H)-yl)methyl)-*N*-methylbenzamide (3bq)  
(mixture of rotamers)

Conditions: *N*-chlorosaccharin (44 mg, 0.2 mmol) or *N*-bromosaccharin(52 mg, 0.2 mmol), LiO*t*Bu (16mg, 0.2 mmol), 1.0 ml PhCl, 3,5-dichloro-*N,N*-dimethylbenzamide (218 mg, 1 mmol), overnight. The product was isolated by flash chromatography (ethyl acetate/dichloromethane=1/10 to 1/3) as a white solid (62.3 mg, 78%(X=Cl), 39.9 mg, 50%(X=Br)).

<sup>1</sup>H NMR (400 MHz, CDCl<sub>3</sub>) δ 8.09 (d, *J* = 7.0 Hz, 1H), 8.00 – 7.83 (m, 3H), 7.39 (d, *J* = 26.1 Hz, 3H), 5.51 (d, *J* = 126.2 Hz, 2H), 3.05 (s, 3H).

<sup>13</sup>C NMR (101 MHz, CDCl<sub>3</sub>) δ 169.3 (s), 159.0 (s), 137.8 (s), 135.5 (s), 135.4 (s), 134.6 (s), 130.2 (s), 126.5 (s), 125.7 (s), 121.2 (s), 54.7 (s), 50.1 (s), 36.3 (s), 31.6 (s).

HRMS (ESI) *m/z*: [M+H]<sup>+</sup> calcd for C<sub>16</sub>H<sub>13</sub>Cl<sub>2</sub>N<sub>2</sub>O<sub>4</sub>S 398.9968; found 398.9979.

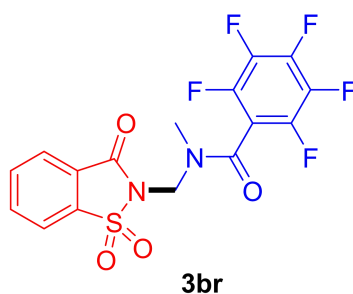

*N*-((1,1-dioxido-3-oxobenzo[d]isothiazol-2(3H)-yl)methyl)-2,3,4,5,6-pentafluoro-*N*-methylbenzamide (**3br**) (mixture of rotamers)

Conditions: *N*-chlorosaccharin (44 mg, 0.2 mmol) or *N*-bromosaccharin(52 mg, 0.2 mmol), LiOtBu (16mg, 0.2 mmol), 1.0 ml PhCl, 2,3,4,5,6-pentafluoro-*N,N*-dimethylbenzamide (239 mg, 1 mmol), overnight. The product was isolated by flash chromatography (ethyl acetate/dichloromethane=1/10 to 1/3) as a white solid (44.6 mg, 53%(X=Cl), 59.7 mg, 71%(X=Br)). m.p: 129-132 °C

<sup>1</sup>H NMR (400 MHz, CDCl<sub>3</sub>) δ 8.08 (dd, *J* = 21.1, 7.5 Hz, 1H), 8.00 – 7.83 (m, 3H), 5.44 (d, *J* = 160.6 Hz, 2H), 3.16 (d, *J* = 80.2 Hz, 3H).

<sup>13</sup>C NMR (101 MHz, CDCl<sub>3</sub>) δ 159.4 (d, *J* = 75 Hz), 159.2 (s), 159.0 (s), 144.8 (ddd, *J* = 12.8, 8.0, 3.9 Hz), 144.3 (ddd, *J* = 12.1, 8.2, 4.1 Hz), 142.5 – 142.1 (m), 141.8 (qd, *J* = 8.4, 3.9 Hz), 139.2 – 138.7 (m), 137.9 (s), 137.4 (s), 136.8 – 136.2 (m), 135.7 (s), 135.5(s), 134.9 (s), 134.6 (s), 126.5 (s), 126.3 (s), 125.8 (s), 125.6 (s), 121.3 (s), 121.3 (s), 110.3 (dd, *J* = 42.0, 20.2 Hz), 54.2 (s), 49.4 (s), 34.9 (s), 33.0 (s).

<sup>19</sup>F NMR (377 MHz, CDCl<sub>3</sub>) δ -139.01 (tdd, *J* = 8.7, 5.8, 2.8 Hz), -139.94 (ddd, *J* = 11.6, 7.4, 3.4 Hz), -150.56 – -150.72 (m), -150.98 (tt, *J* = 20.6, 2.1 Hz), -159.62 (tt, *J* = 20.6, 5.8 Hz), -159.82 (ddd, *J* = 20.7, 16.1, 5.9 Hz).

HRMS (ESI) *m/z*: [M+H]<sup>+</sup> calcd for C<sub>16</sub>H<sub>10</sub>F<sub>5</sub>N<sub>2</sub>O<sub>4</sub>S 421.0276; found 421.0282.

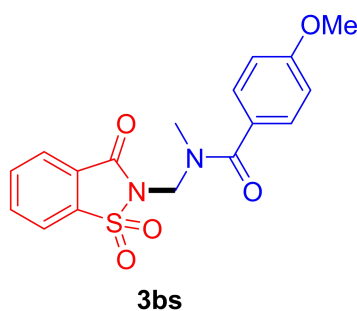

*N*-((1,1-dioxido-3-oxobenzo[d]isothiazol-2(3H)-yl)methyl)-4-methoxy-*N*-methylbenzamide (**3bs**) (mixture of rotamers)

Conditions: *N*-chlorosaccharin (44 mg, 0.2 mmol) or *N*-bromosaccharin(52 mg, 0.2 mmol), LiOtBu (16mg, 0.2 mmol), 1.0 ml PhCl, 4-methoxy-*N,N*-dimethylbenzamide (179 mg, 1 mmol), overnight. The product was isolated by flash chromatography (ethyl acetate/dichloromethane=1/10 to 1/3) as a white solid (31.7 mg, 44%(X=Cl), 25.9 mg, 36%(X=Br)). m.p: 223-227 °C

<sup>1</sup>H NMR (400 MHz, CDCl<sub>3</sub>) δ 8.07 (d, *J* = 7.4 Hz, 1H), 7.97 – 7.80 (m, 3H), 7.50 (d, *J* = 8.6 Hz, 2H), 6.92 (d, *J* = 8.5 Hz, 2H), 5.60 (s, 2H), 3.83 (s, 3H), 3.10 (s, 3H).

<sup>13</sup>C NMR (101 MHz, CDCl<sub>3</sub>) δ 172.2 (s), 161.2 (s), 159.1 (s), 137.9 (s), 135.3 (s), 134.5 (s), 129.6 (s), 127.2 (s), 126.7 (s), 125.5 (s), 121.1 (s), 113.7 (s), 55.4 (s), 53.4 (s), 31.6 (s).

HRMS (ESI) m/z: [M+Na]<sup>+</sup> calcd for C<sub>17</sub>H<sub>16</sub>N<sub>2</sub>NaO<sub>5</sub>S 383.0672; found, 383.0669.

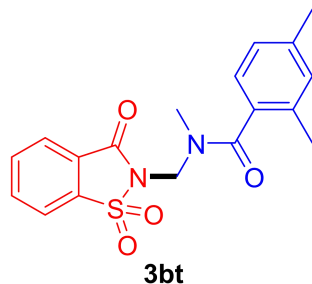

*N*-((1,1-dioxido-3-oxobenzo[d]isothiazol-2(3H)-yl)methyl)-*N*,2,4-trimethylbenzamide (**3bt**) (mixture of rotamers)

Conditions: *N*-chlorosaccharin (44 mg, 0.2 mmol) or *N*-bromosaccharin(52 mg, 0.2 mmol), LiO*t*Bu (16mg, 0.2 mmol), 1.0 ml PhCl, *N,N*,2,4-tetramethylbenzamide (177 mg, 1 mmol), overnight. The product was isolated by flash chromatography (ethyl acetate/dichloromethane=1/10 to 1/3) as a pale yellow solid (22.9 mg, 32%(X=Cl), 20.0 mg, 28%(X=Br)).

<sup>1</sup>H NMR (400 MHz, CDCl<sub>3</sub>) δ 8.06 (dd, *J* = 18.5, 7.3 Hz, 1H), 7.98 – 7.80 (m, 3H), 7.35 – 6.93 (m, 3H), 5.71 (s, 2H), 3.03 (d, *J* = 98.2 Hz, 3H), 2.42 – 2.24 (m, 6H).

<sup>13</sup>C NMR (101 MHz, CDCl<sub>3</sub>) δ 172.4 (s), 172.0 (s), 159.3 (s), 158.9 (s), 139.6 (s), 139.1 (s), 138.0 (s), 137.(s), 135.5 (s), 134.4 (s), 134.6 (s), 134.6 (s),134.5 (s), 132.4 (s), 131.8 (s), 131.9 (s), 131.5 (s), 131.2 (s), 127.3 (s), 126.7 (s), 126.4 (s), 126.0 (s), 125.5 (s), 121.1 (s), 54.5 (s), 49.7 (s), 35.4 (s), 31.1 (s), 21.2 (s), 19.1 (s), 18.8 (s).

HRMS (ESI) m/z: [M+K]<sup>+</sup> calcd for C<sub>18</sub>H<sub>18</sub>N<sub>2</sub>KO<sub>4</sub>S 397.0619; found, 397.0609.

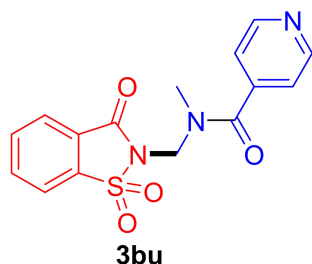

*N*-((1,1-dioxido-3-oxobenzo[d]isothiazol-2(3H)-yl)methyl)-*N*-methylisonicotinamide (**3bu**) (mixture of rotamers)

Conditions: *N*-chlorosaccharin (44 mg, 0.2 mmol) or *N*-bromosaccharin(52 mg, 0.2 mmol), LiO*t*Bu (16mg, 0.2 mmol), 1.0 ml PhCl, *N,N*-dimethylisonicotinamide (150 mg, 1 mmol), overnight. The product was isolated by flash chromatography (ethyl acetate/dichloromethane=1/10 to 1/3) as a pale yellow oil (23.2 mg, 35%(X=Cl), 34.5 mg, 52%(X=Br)).

<sup>1</sup>H NMR (400 MHz, CDCl<sub>3</sub>) δ 8.73 (d, *J* = 18.7 Hz, 2H), 8.10 (s, 1H), 8.01 – 7.82 (m, 3H), 7.41 (d, *J* = 42.4 Hz, 2H), 5.50 (d, *J* = 156.8 Hz, 2H), 3.08 (d, *J* = 55.7 Hz, 3H).

<sup>13</sup>C NMR (101 MHz, CDCl<sub>3</sub>) δ 169.7 (s), 159.0 (s), 150.3 (s), 142.7 (s), 137.8 (s), 135.5 (s), 134.6 (s), 126.6 (s), 125.7 (s), 121.8 (s), 121.7 (s), 121.0 (s), 54.6 (s), 49.9 (s), 36.1 (s), 31.8 (s).

HRMS (ESI) m/z: [M+Na]<sup>+</sup> calcd for C<sub>15</sub>H<sub>14</sub>N<sub>3</sub>NaO<sub>4</sub>S 354.0519; found, 354.0515.

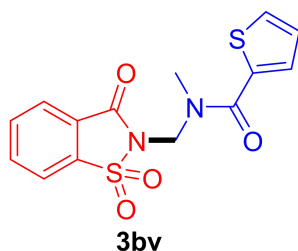

*N*-((1,1-dioxido-3-oxobenzo[d]isothiazol-2(3H)-yl)methyl)-*N*-methylthiophene-2-carboxamide (**3bv**) (mixture of rotamers)

Conditions: *N*-chlorosaccharin (44 mg, 0.2 mmol) or *N*-bromosaccharin(52 mg, 0.2 mmol), LiOtBu (16mg, 0.2 mmol), 1.0 ml PhCl, *N,N*-dimethylthiophene-2-carboxamide (155 mg, 1 mmol), overnight. The product was isolated by flash chromatography (ethyl acetate/dichloromethane=1/10 to 1/3) as a white solid (21.5 mg, 32%(X=Cl), 36.3 mg, 54%(X=Br)). m.p: 124-127 °C

<sup>1</sup>H NMR (400 MHz, CDCl<sub>3</sub>) δ 8.09 (d, *J* = 7.3 Hz, 1H), 7.97 – 7.80 (m, 3H), 7.50 (dd, *J* = 6.5, 4.4 Hz, 2H), 7.07 (dd, *J* = 4.8, 3.9 Hz, 1H), 5.67 (s, 2H), 3.31 (s, 3H).

<sup>13</sup>C NMR (101 MHz, CDCl<sub>3</sub>) δ 165.2 (s), 159.2 (s), 137.9 (s), 136.5 (s), 135.4 (s), 134.5 (s), 130.4 (s), 130.0 (s), 126.9 (s), 126.6 (s), 125.6 (s), 121.1 (s), 52.7 (s), 35.9 (s).

HRMS (ESI) *m/z*: [M+H]<sup>+</sup> calcd for C<sub>14</sub>H<sub>13</sub>N<sub>2</sub>O<sub>4</sub>S<sub>2</sub> 337.0311; found 337.0319.

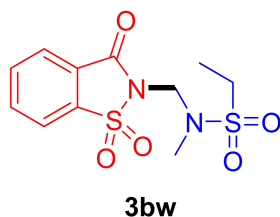

*N*-((1,1-dioxido-3-oxobenzo[d]isothiazol-2(3H)-yl)methyl)-*N*-methylethanesulfonamide (**3bw**) (mixture of rotamers)

Conditions: *N*-chlorosaccharin (44 mg, 0.2 mmol) or *N*-bromosaccharin(52 mg, 0.2 mmol), LiOtBu (16mg, 0.2 mmol), 1.0 ml PhCl, *N,N*-dimethylethanesulfonamide (137 mg, 1 mmol), overnight. The product was isolated by flash chromatography (ethyl acetate/dichloromethane=1/10 to 1/3) as a white solid (34.4 mg, 54%(X=Cl),35.7 mg, 56%(X=Br)). m.p: 144-147 °C

<sup>1</sup>H NMR (400 MHz, CDCl<sub>3</sub>) δ 8.07 (d, *J* = 7.5 Hz, 1H), 8.00 – 7.79 (m, 3H), 5.32 (s, 2H), 3.16 (q, *J* = 7.4 Hz, 2H), 3.07 (s, 3H), 1.34 (t, *J* = 7.4 Hz, 3H).

<sup>13</sup>C NMR (101 MHz, CDCl<sub>3</sub>) δ 159.6 (s), 137.6 (s), 135.7 (s), 134.8 (s), 126.5 (s), 125.7 (s), 121.3 (s), 53.8 (s), 46.9 (s), 34.8 (s), 7.9 (s).

HRMS (ESI) *m/z*: [M+Na]<sup>+</sup> calcd for C<sub>11</sub>H<sub>14</sub>N<sub>2</sub>NaO<sub>5</sub>S<sub>2</sub> 341.0236; found 341.0240.

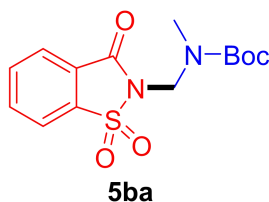

*tert*-butyl ((1,1-dioxido-3-oxobenzo[d]isothiazol-2(3H)-yl)methyl)(methyl)carbamate (**5ba**) (mixture of rotamers)

Conditions: *N*-chlorosaccharin (44 mg, 0.2 mmol) or *N*-bromosaccharin(52 mg, 0.2 mmol), LiOtBu



(16mg, 0.2 mmol), 1.0 ml PhCl, *tert*-butyl dimethylcarbamate (145 mg, 1 mmol), overnight. The product was isolated by flash chromatography (ethyl acetate/dichloromethane=1/10 to 1/3) as a pale yellow oil (52.2 mg, 80%(X=Cl), 55.5 mg, 85%(X=Br)).

<sup>1</sup>H NMR (400 MHz, CDCl<sub>3</sub>) δ 7.99 (d, *J* = 7.4 Hz, 1H), 7.81 (m, 3H), 5.32 (d, *J* = 18.4 Hz, 2H), 2.90 (s, 3H), 1.45 (d, *J* = 25.2 Hz, 9H).

<sup>13</sup>C NMR (101 MHz, CDCl<sub>3</sub>) δ 159.3 (s), 154.4 (s), 138.1 (s), 135.3 (s), 134.3 (s), 126.7 (s), 125.4 (s), 121.0 (s), 81.6 (s), 81.0 (s), 53.0 (s), 52.8 (s), 33.7 (s), 33.3 (s), 28.1 (s).

HRMS (ESI) *m/z*: [M+Na]<sup>+</sup> calcd for C<sub>14</sub>H<sub>18</sub>N<sub>2</sub>NaO<sub>5</sub>S 349.0829; found 349.0840.

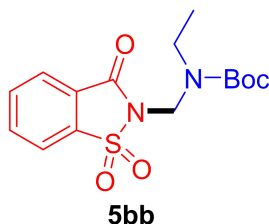

*tert*-butyl ((1,1-dioxido-3-oxobenzo[d]isothiazol-2(3H)-yl)methyl)(ethyl)carbamate (**5bb**) (mixture of rotamers)

Conditions: *N*-chlorosaccharin (44 mg, 0.2 mmol) or *N*-bromosaccharin(52 mg, 0.2 mmol), LiOtBu (16mg, 0.2 mmol), 1.0 ml PhCl, *tert*-butyl ethyl(methyl)carbamate (159 mg, 1 mmol), overnight.

The product was isolated by flash chromatography (ethyl acetate/dichloromethane=1/10 to 1/3) as a pale yellow oil (30.6 mg, 45%(X=Cl), 17.7 mg, 26%(X=Br)).

<sup>1</sup>H NMR (400 MHz, CDCl<sub>3</sub>) δ 8.05 (d, *J* = 7.4 Hz, 1H), 7.94 – 7.78 (m, 3H), 5.37 (s, 2H), 3.41 (d, *J* = 6.7 Hz, 2H), 1.52 (d, *J* = 22.5 Hz, 9H), 1.17 (t, *J* = 7.0 Hz, 3H).

<sup>13</sup>C NMR (101 MHz, CDCl<sub>3</sub>) δ 159.4 (s), 153.9 (s), 138.2 (s), 135.2 (s), 134.3 (s), 126.6 (s), 125.4 (s), 120.9 (s), 81.6 (s), 51.1 (s), 41.6 (s), 40.8 (s), 28.2 (s), 13.8 (s), 13.2 (s).

HRMS (ESI) *m/z*: [M+Na]<sup>+</sup> calcd for C<sub>15</sub>H<sub>20</sub>N<sub>2</sub>NaO<sub>5</sub>S 363.0985; found 363.0977.

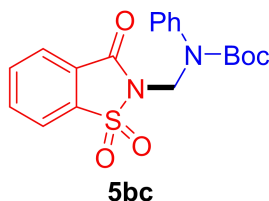

*tert*-butyl ((1,1-dioxido-3-oxobenzo[d]isothiazol-2(3H)-yl)methyl)(phenyl)carbamate (**5bc**) (mixture of rotamers)

Conditions: *N*-chlorosaccharin (44 mg, 0.2 mmol) or *N*-bromosaccharin(52 mg, 0.2 mmol), LiOtBu (16mg, 0.2 mmol), 1.0 ml PhCl, *tert*-butyl methyl(phenyl)carbamate (207 mg, 1 mmol), overnight.

The product was isolated by flash chromatography (ethyl acetate/dichloromethane=1/10 to 1/3) as a pale yellow oil (24.1 mg, 31%(X=Cl), 10.1 mg, 13%(X=Br)).

<sup>1</sup>H NMR (400 MHz, CDCl<sub>3</sub>) δ 7.95 – 7.74 (m, 4H), 7.37 – 7.23 (m, 5H), 5.76 (d, *J* = 10.1 Hz, 2H), 1.53 (s, 9H).

<sup>13</sup>C NMR (101 MHz, CDCl<sub>3</sub>) δ 158.3 (s), 154.0 (s), 139.8 (s), 138.1 (s), 135.1 (s), 134.2 (s), 129.1 (s), 127.9 (s), 127.4 (s), 126.5 (s), 125.5 (s), 120.9 (s), 82.2 (s), 53.2 (s), 28.2 (s).

HRMS (ESI) *m/z*: [M+H]<sup>+</sup> calcd for C<sub>19</sub>H<sub>21</sub>N<sub>2</sub>O<sub>5</sub>S 389.1166; found 389.1167.

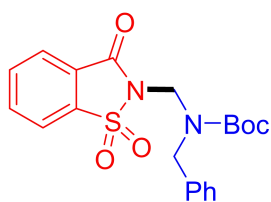

**5bd**

*tert*-butyl benzyl((1,1-dioxido-3-oxobenzo[d]isothiazol-2(3H)-yl)methyl)carbamate (**5bd**) (mixture of rotamers)

Conditions: *N*-chlorosaccharin (44 mg, 0.2 mmol) or *N*-bromosaccharin(52 mg, 0.2 mmol), LiOtBu (16mg, 0.2 mmol), 1.0 ml PhCl, *tert*-butyl benzyl(methyl)carbamate (221 mg, 1 mmol), overnight. The product was isolated by flash chromatography (ethyl acetate/dichloromethane=1/10 to 1/3) as a white solid (36.2 mg, 45%(X=Cl), 8.0 mg, 10%(X=Br)).

<sup>1</sup>H NMR (400 MHz, CDCl<sub>3</sub>) δ 7.97 (d, *J* = 7.4 Hz, 1H), 7.87 – 7.72 (m, 3H), 7.37 – 7.15 (m, 5H), 5.29 (d, *J* = 39.7 Hz, 2H), 4.49 (d, *J* = 9.5 Hz, 2H), 1.48 (d, *J* = 43.8 Hz, 9H).

<sup>13</sup>C NMR (101 MHz, CDCl<sub>3</sub>) δ 159.5 (s), 154.5 (s), 138.2 (s), 137.5 (s), 135.2 (s), 134.3 (s), 128.5 (s), 128.4 (s), 127.5 (s), 125.4 (s), 120.9 (s), 82.0 (s), 50.6 (s), 48.6 (s), 28.2 (s).

HRMS (ESI) *m/z*: [M+H]<sup>+</sup> calcd for C<sub>20</sub>H<sub>23</sub>N<sub>2</sub>O<sub>5</sub>S 403.1322; found 403.1322.

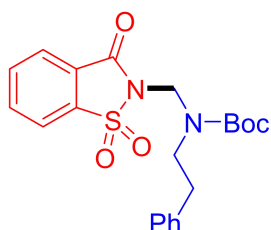

**5be**

*tert*-butyl ((1,1-dioxido-3-oxobenzo[d]isothiazol-2(3H)-yl)methyl)(phenethyl)carbamate (**5be**) (mixture of rotamers)

Conditions: *N*-chlorosaccharin (44 mg, 0.2 mmol) or *N*-bromosaccharin(52 mg, 0.2 mmol), LiOtBu (16mg, 0.2 mmol), 1.0 ml PhCl, *tert*-butyl methyl(phenethyl)carbamate (235 mg, 1 mmol), overnight. The product was isolated by flash chromatography (ethyl acetate/dichloromethane=1/10 to 1/3) as a pale yellow oil (20.0 mg, 24%(X=Cl), 10.0 mg, 12%(X=Br)).

<sup>1</sup>H NMR (400 MHz, CDCl<sub>3</sub>) δ 8.06 (d, *J* = 7.3 Hz, 1H), 7.93 – 7.79 (m, 3H), 7.32 – 7.13 (m, 5H), 5.27 (d, *J* = 29.0 Hz, 2H), 3.58 (dt, *J* = 14.7, 7.4 Hz, 2H), 2.91 (dd, *J* = 14.5, 7.2 Hz, 2H), 1.54 (d, *J* = 30.6 Hz, 9H).

<sup>13</sup>C NMR (101 MHz, CDCl<sub>3</sub>) δ 159.546 (s), 154.0 (s), 138.9 (s), 138.2 (s), 135.2(s), 134.3 (s), 132.0 (s), 130.2 (s), 129.9 (s), 129.1 (s), 128.5 (s), 128.4 (s), 126.6 (s), 126.4 (s), 126.3 (s), 125.4 (s), 81.8 (s), 81.1 (s), 51.8 (s), 51.5 (s), 48.656 (s), 48.2 (s), 35.2 (s), 34.4 (s), 28.2 (s).

HRMS (ESI) *m/z*: [M+H]<sup>+</sup> calcd for C<sub>21</sub>H<sub>25</sub>N<sub>2</sub>O<sub>5</sub>S 417.1479; found 417.1467.

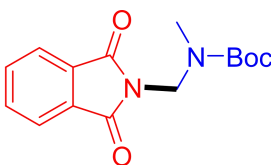

**5aa**

*tert*-butyl ((1,3-dioxoisindolin-2-yl)methyl)(methyl)carbamate (**5aa**) (mixture of rotamers)

Conditions: *N*-bromophthalimide (45 mg, 0.2 mmol), LiOtBu (16mg, 0.2 mmol), 1.0 ml PhCl, *tert*-butyl dimethylcarbamate (145 mg, 1 mmol), overnight.

The product was isolated by flash chromatography (ethyl acetate/dichloromethane=1/10 to 1/3) as a white solid (13.4 mg, 23%).

<sup>1</sup>H NMR (400 MHz, CDCl<sub>3</sub>) δ 7.88 (dd, *J* = 5.4, 3.1 Hz, 2H), 7.74 (dd, *J* = 5.4, 3.1 Hz, 2H), 5.22 (s, 2H), 2.96 (s, 3H), 1.51 (s, 9H).

<sup>13</sup>C NMR (101 MHz, CDCl<sub>3</sub>) δ 167.8 (s), 155.0 (s), 134.2 (s), 131.9 (s), 123.6 (s), 80.7 (s), 51.4 (s), 33.9 (s), 28.3 (s).

HRMS (ESI) *m/z*: [M+Na]<sup>+</sup> calcd for C<sub>15</sub>H<sub>18</sub>N<sub>2</sub>NaO<sub>4</sub> 313.1159; found 313.1165.

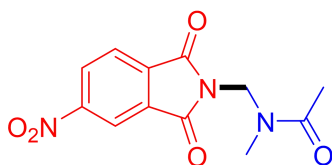

**3ca**

*N*-methyl-*N*-((5-nitro-1,3-dioxoisindolin-2-yl)methyl)acetamide (**3ca**)<sup>4</sup> (mixture of rotamers)

Conditions: 2-bromo-5-nitroisindoline-1,3-dione (54 mg, 0.2 mmol), LiOtBu (16mg, 0.2 mmol), 1.0 ml PhCl, *N,N*-dimethylacetamide (87 mg, 1 mmol), overnight. The product was isolated by flash chromatography (ethyl acetate/dichloromethane=1/10 to 1/3) as a yellow solid (18.9 mg, 34%). m.p: 175-178 °C

<sup>1</sup>H NMR (400 MHz, CDCl<sub>3</sub>) δ 8.74 – 8.54 (m, 2H), 8.08 (dd, *J* = 17.2, 8.1 Hz, 1H), 5.30 (d, *J* = 18.7 Hz, 2H), 3.06 (d, *J* = 82.5 Hz, 3H), 2.26 (d, *J* = 145.0 Hz, 3H).

<sup>13</sup>C NMR (101 MHz, CDCl<sub>3</sub>) δ 171.3 (s), 171.1 (s), 165.8 (s), 165.5 (s), 165.5 (s), 165.4 (s), 152.1 (s), 151.9 (s), 136.2 (s), 135.9 (s), 133.2 (s), 133.0 (s), 129.8 (s), 129.5 (s), 125.2 (s), 124.9 (s), 119.3 (s), 119.0 (s), 53.3 (s), 50.7 (s), 36.6 (s), 32.8 (s), 21.8 (s), 21.4 (s).

## GC-MS Spectra from Radical Trapping Experiment

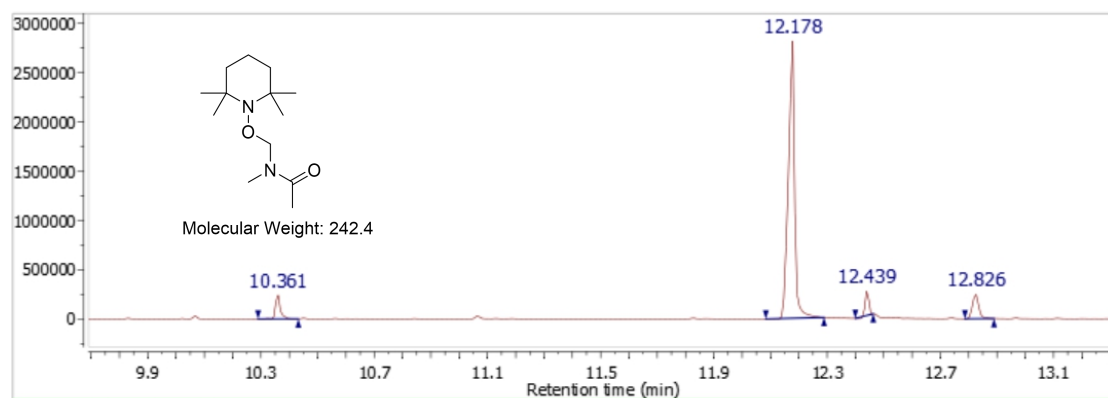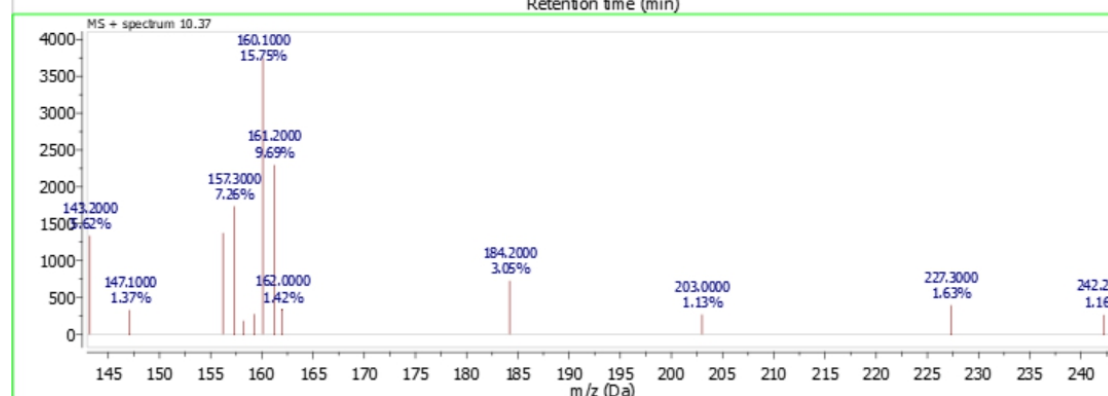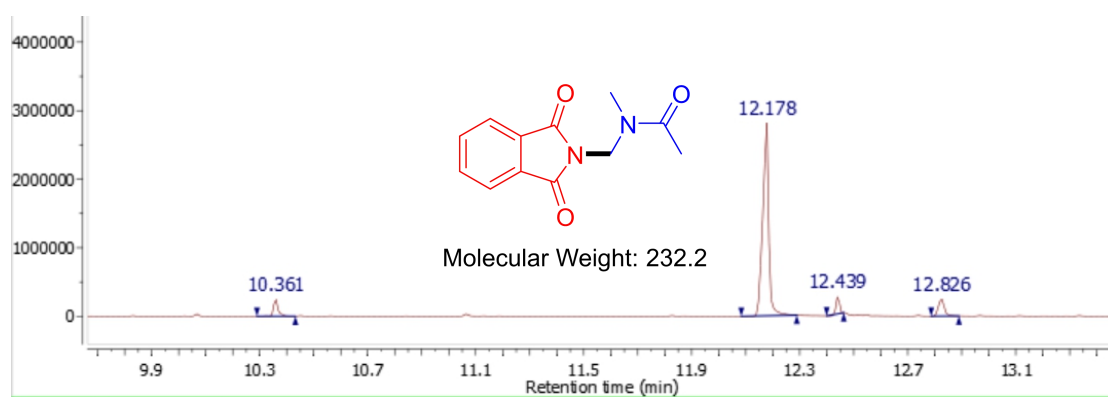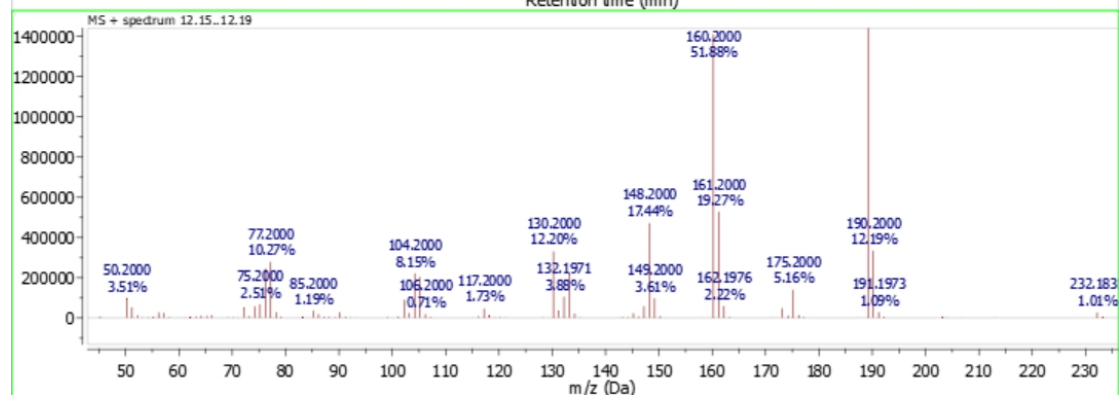

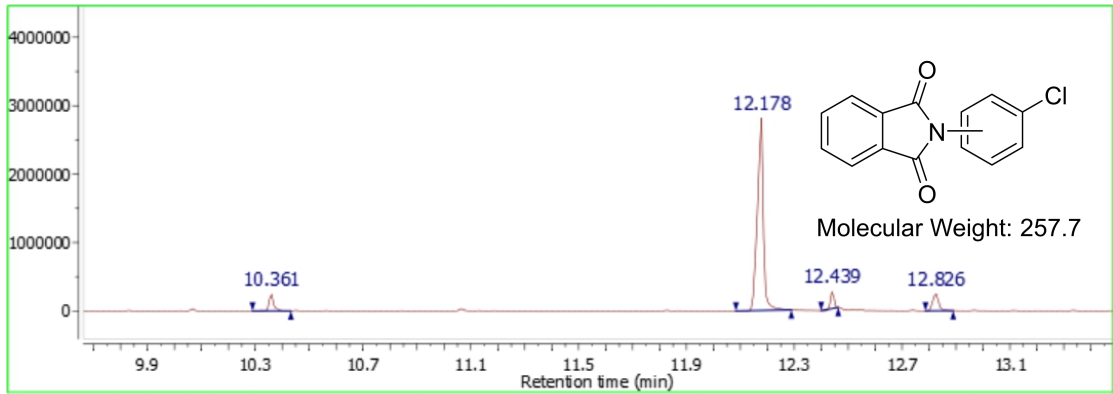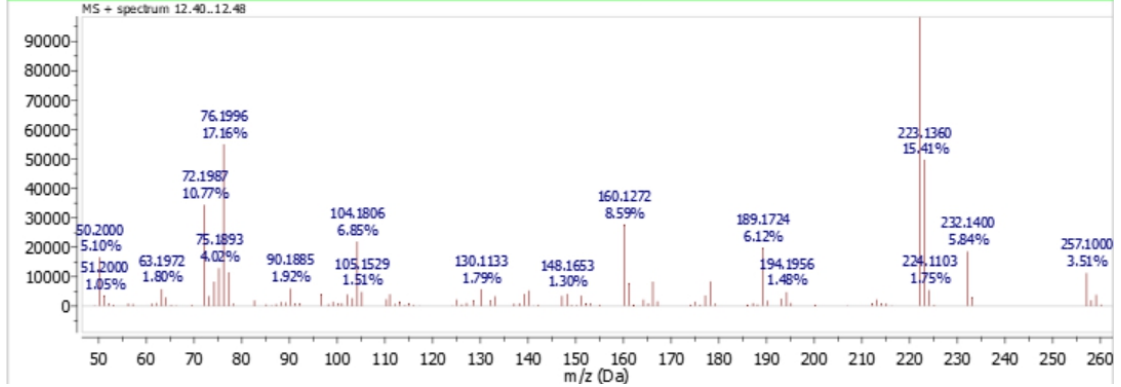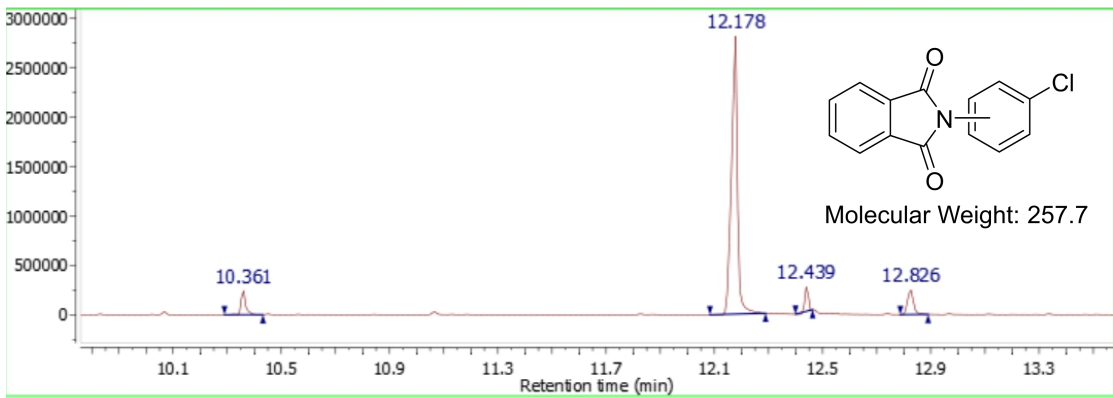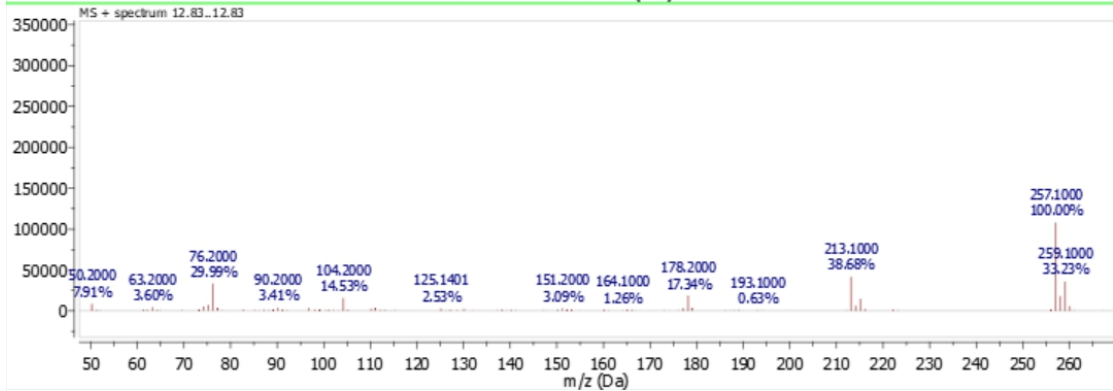

### Supplementary References

- (1) (a) John, J. M.; Loorthuraja, R.; Antoniuk, E.; Bergens, S. H. Catalytic hydrogenation of functionalized amides under basic and neutral conditions. *Catal. Sci. Technol.* **2015**, *5*, 1181–1186. (b) Lu, K.; Han, X.-W.; Yao, W.-W.; Luan, Y.-X.; Wang, Y.-X.; Chen, H.; Xu, X.-T.; Zhang, K.; Ye, M. DMF-Promoted Redox-Neutral Ni-Catalyzed Intramolecular Hydroarylation of Alkene with Simple Arene. *ACS Catal.* **2018**, *8*, 3913-3917.
- (2) Dong, J.- Y.; Xia, Q.; Lv, X.-L.; Yan, C.-C.; Song, H.-J.; Liu, Y.-X.; Wang, Q.-M. Photoredox-Mediated Direct Cross-Dehydrogenative Coupling of Heteroarenes and Amines. *Org. Lett.* **2018**, *20*, 5661-5665.
- (3) Song, L.; Zhang, L.; Luo, S.; Cheng, J. Visible - Light Promoted Catalyst - Free Imidation of Arenes and Heteroarenes. *Chem. - Eur. J.* **2014**, *20*, 14231-14234.
- (4) Lao, Z.-Q.; Zhong, W.-H.; Lou, Q.-H.; Li, Z.-J.; Meng, X.-B. KI-catalyzed imidation of sp<sup>3</sup>C - H bond adjacent to amidinitrogen atom. *Org. Biomol. Chem.* **2012**, *10*, 7869-7871.
- (5) Unterhalt, B. Preparation of N-phthalimidomethyl- and N-benzosulfimidomethyl-N-acyl amines. *Archiv der Pharmazie und Berichte der Deutschen Pharmazeutischen Gesellschaft*, **1967**, *300*(3), 247-249.

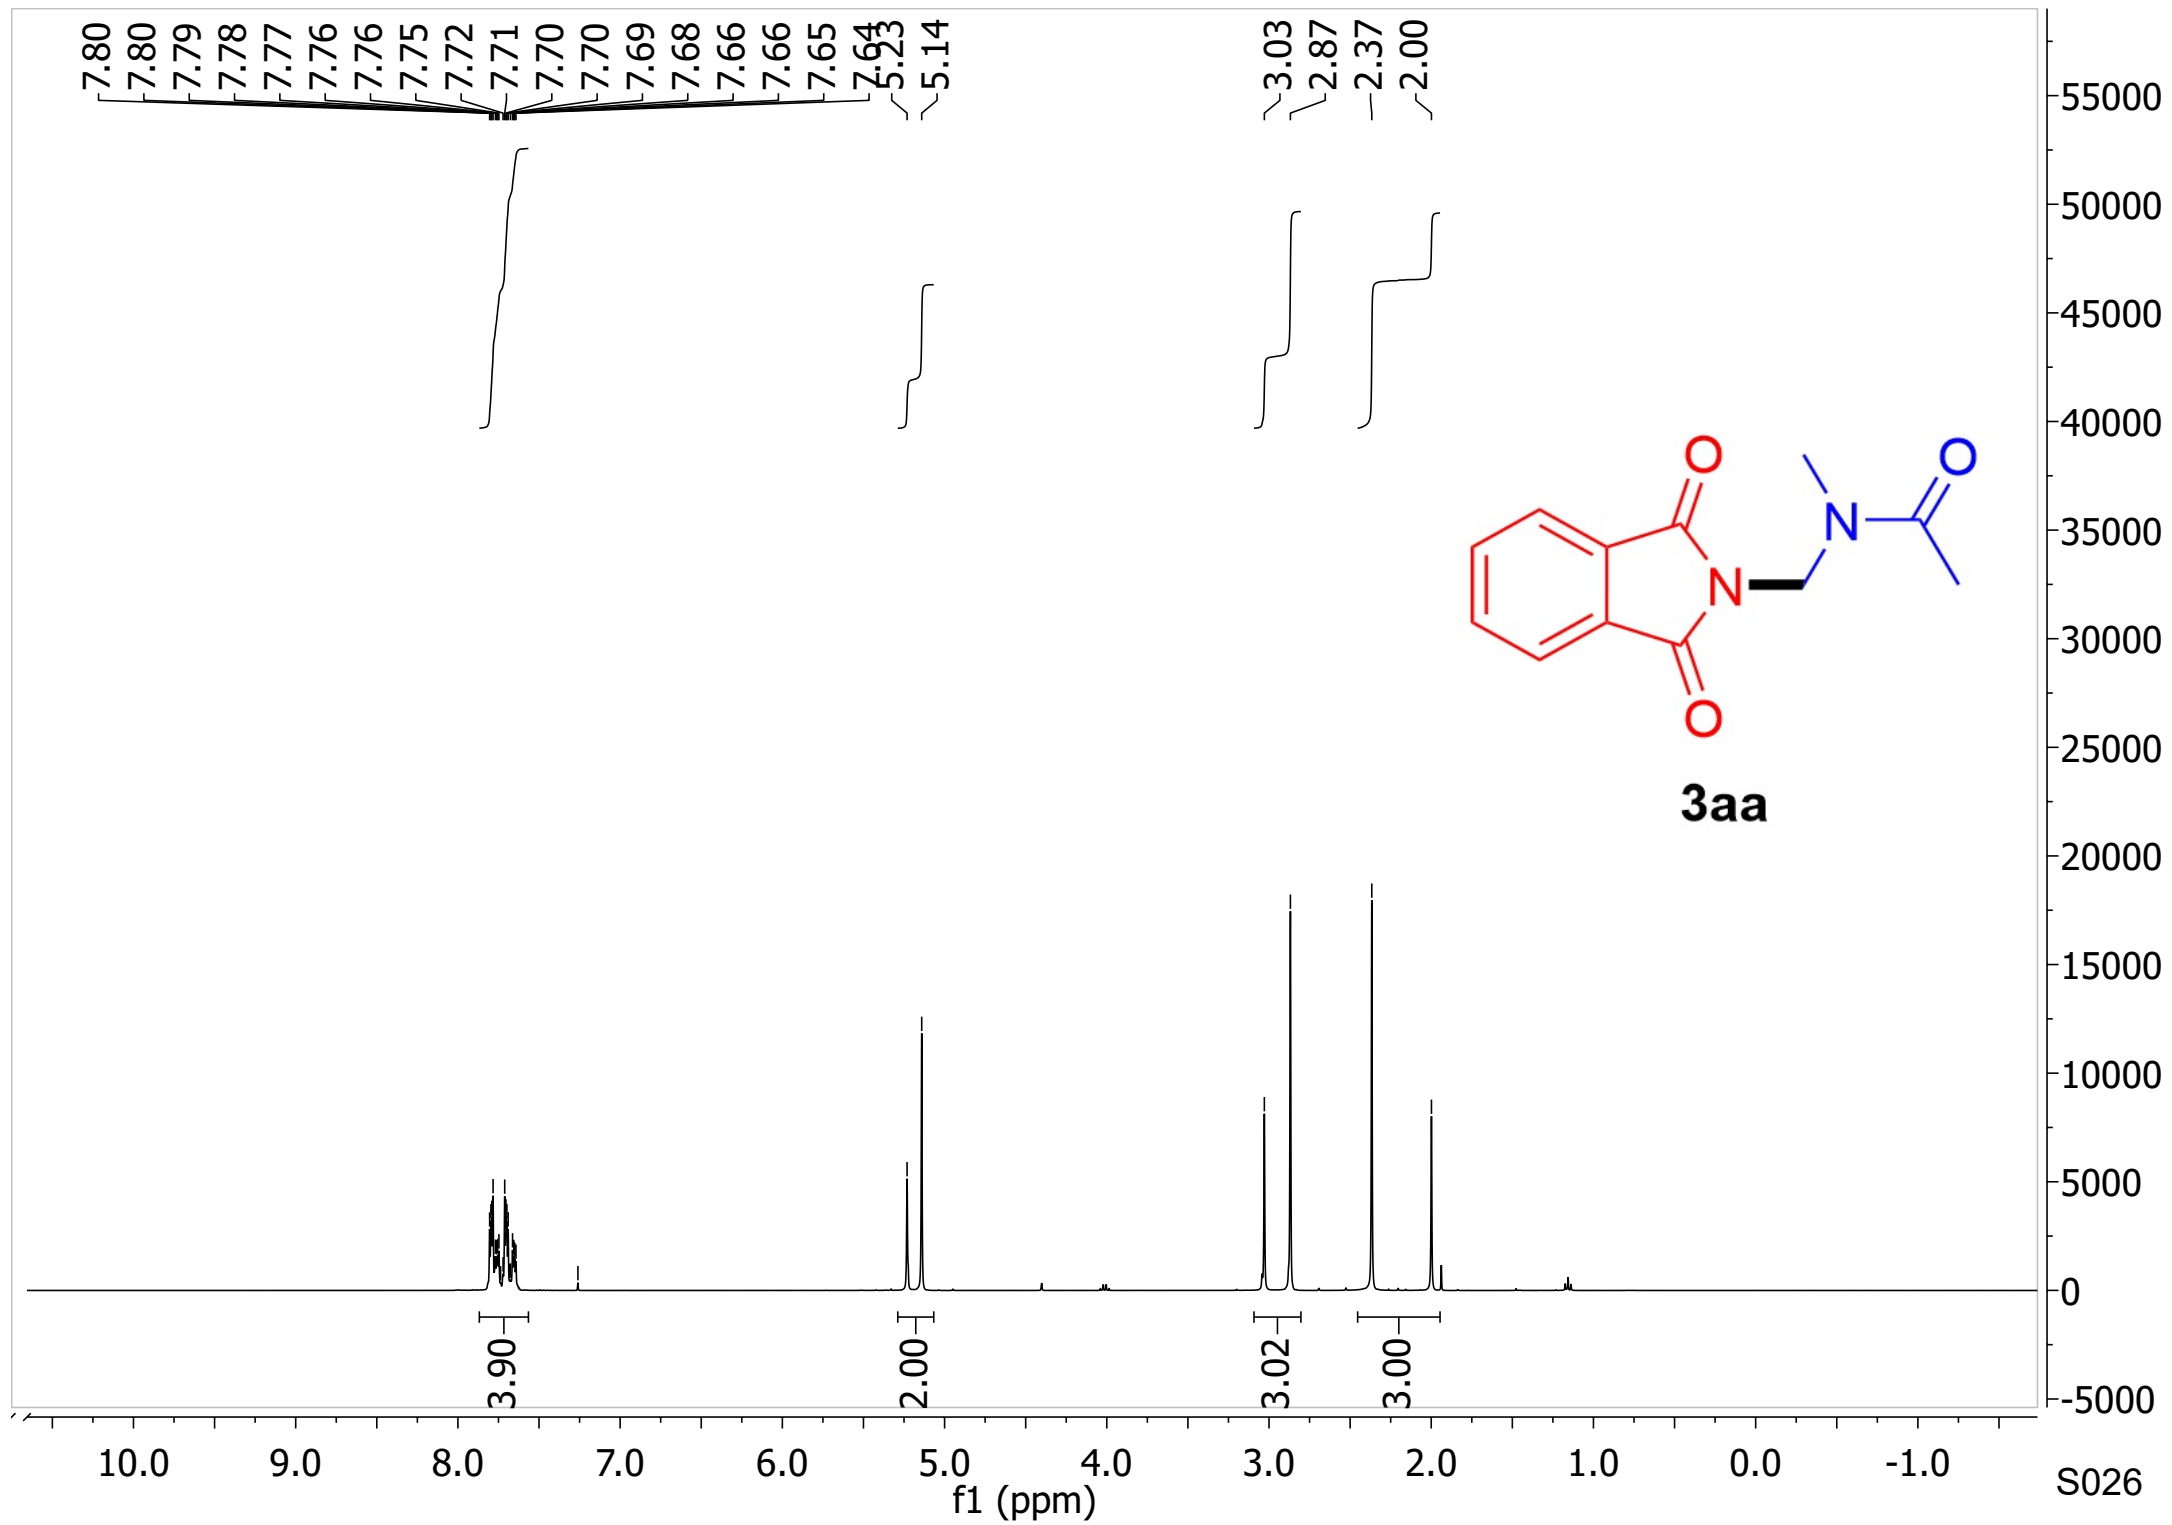

171.07  
170.97  
167.77  
167.58

134.60  
134.24  
131.75  
131.54  
123.71  
123.48

77.52  
77.20  
76.89

52.67  
49.42

35.75  
32.49

21.80  
21.40

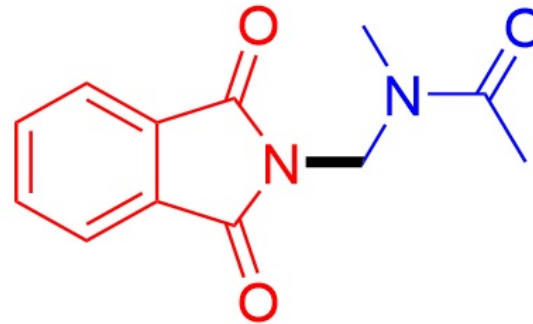

**3aa**

190 170 150 130 110 90 80 70 60 50 40 30 20 10 0

f1 (ppm)

S027



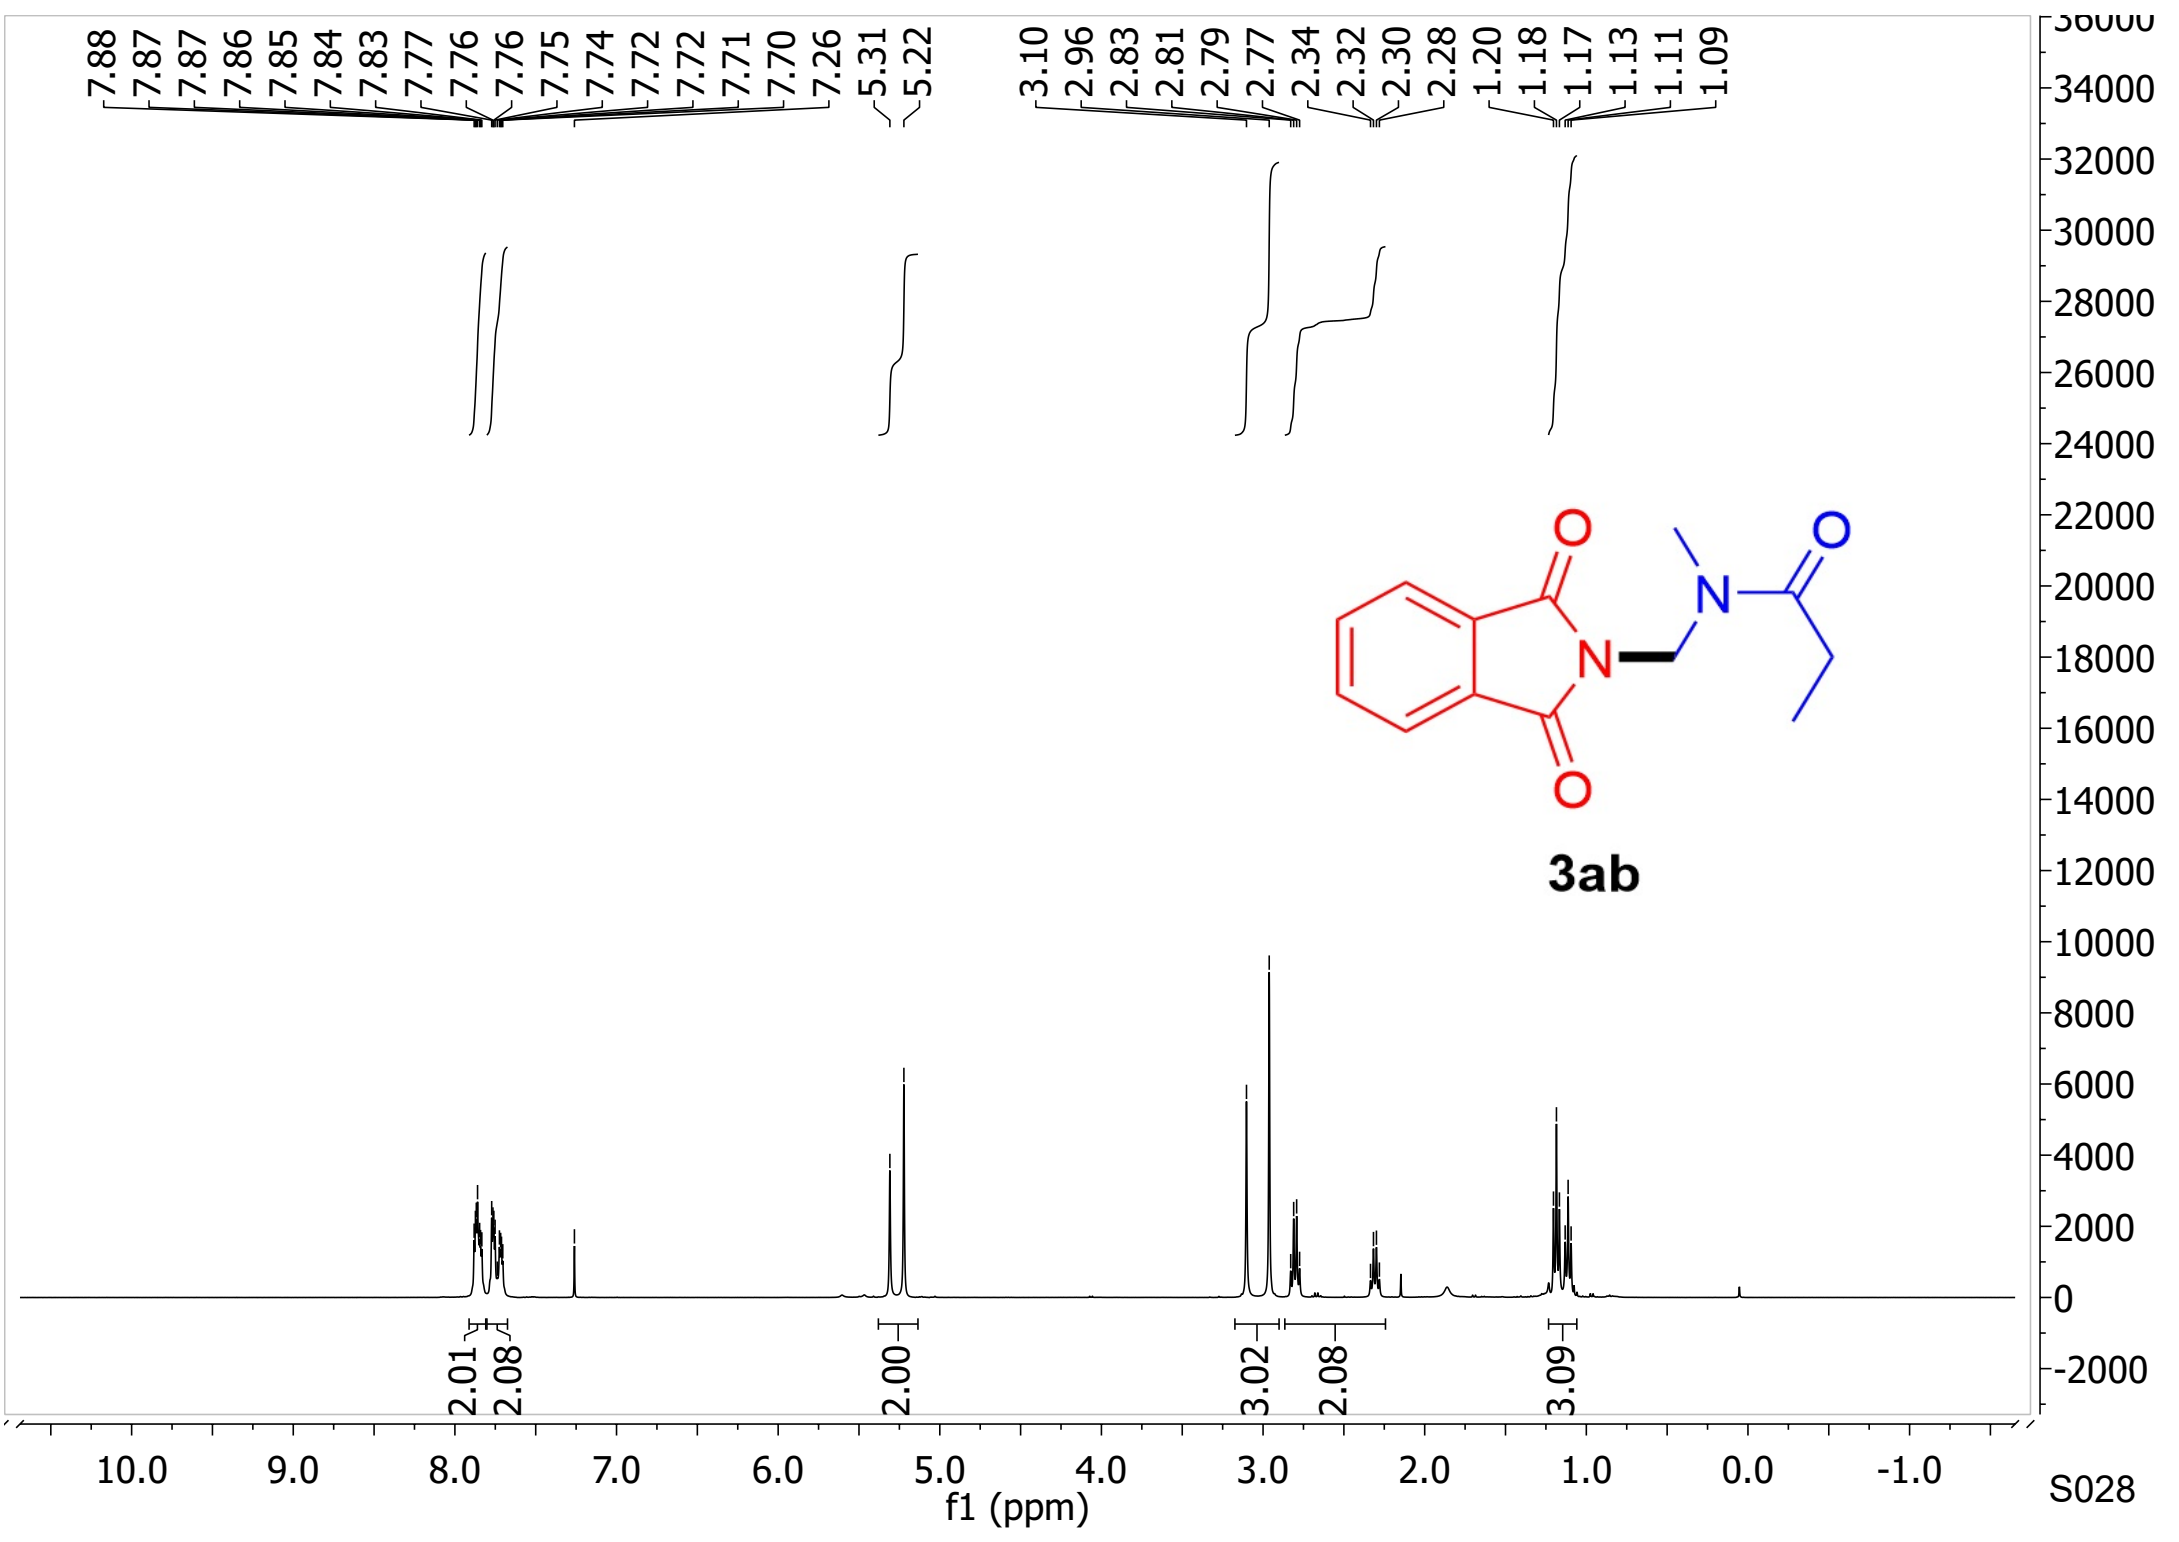

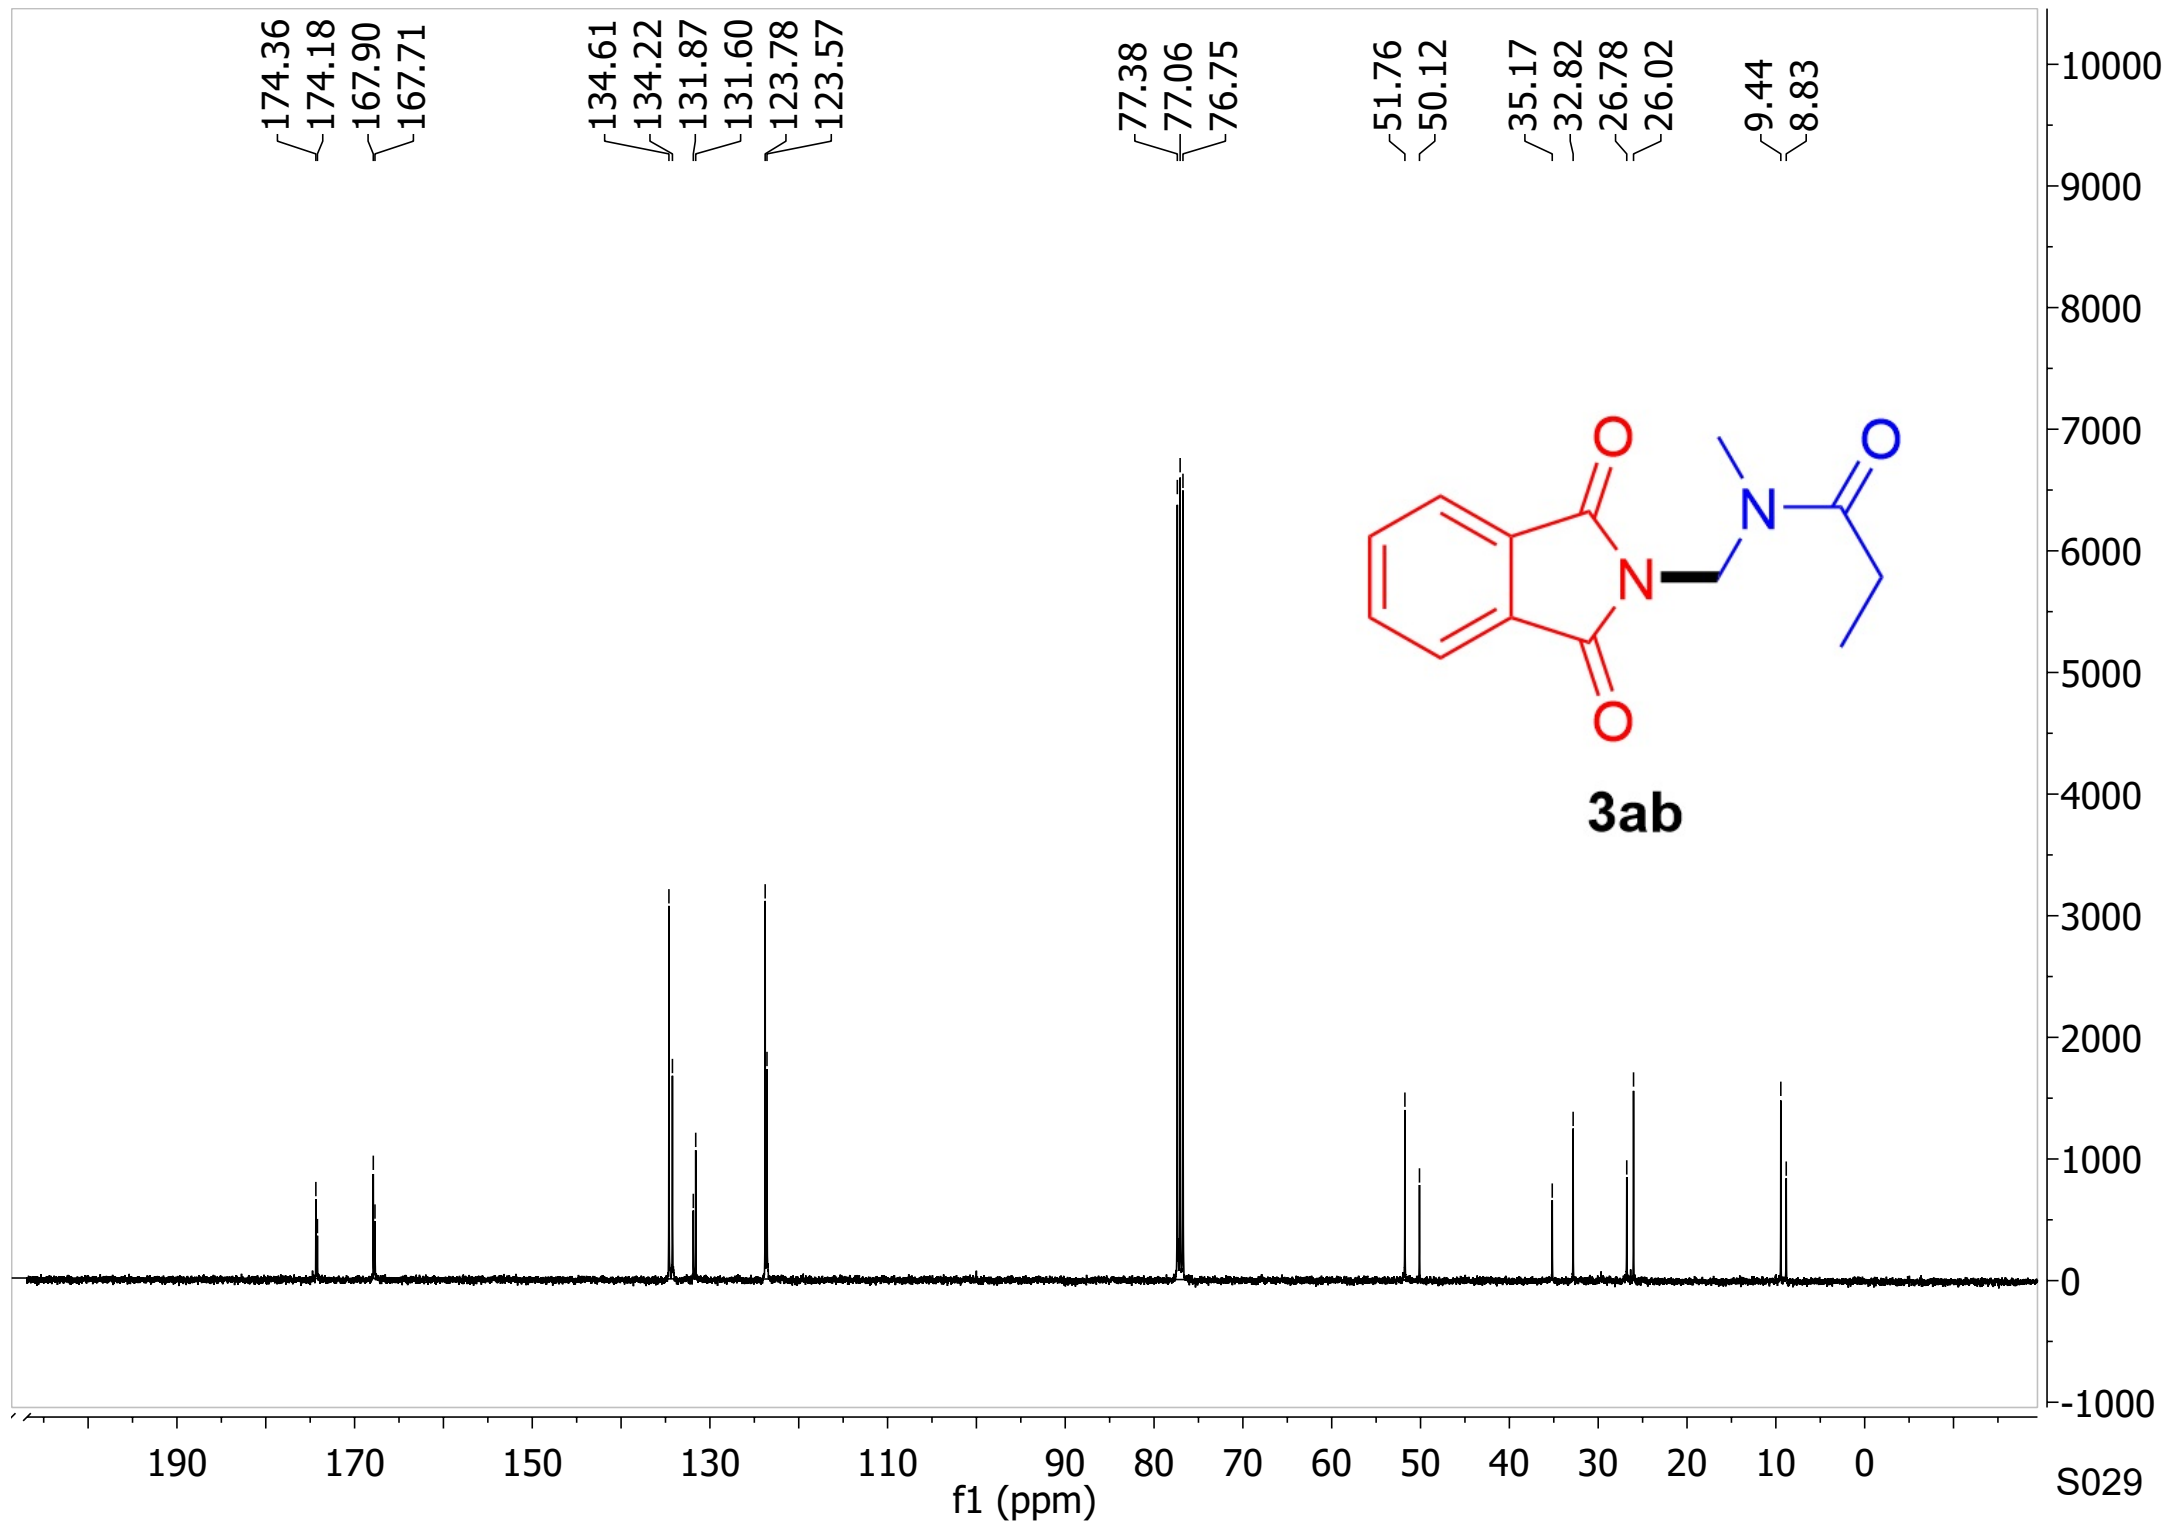

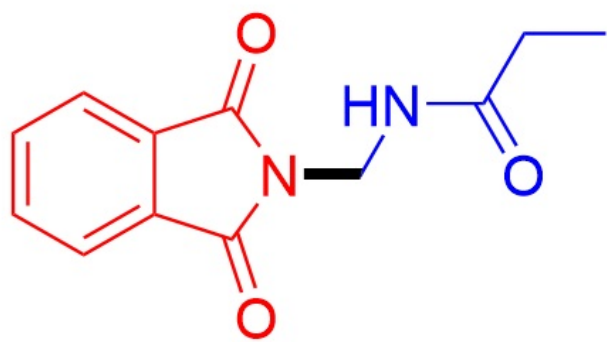

**3ac**

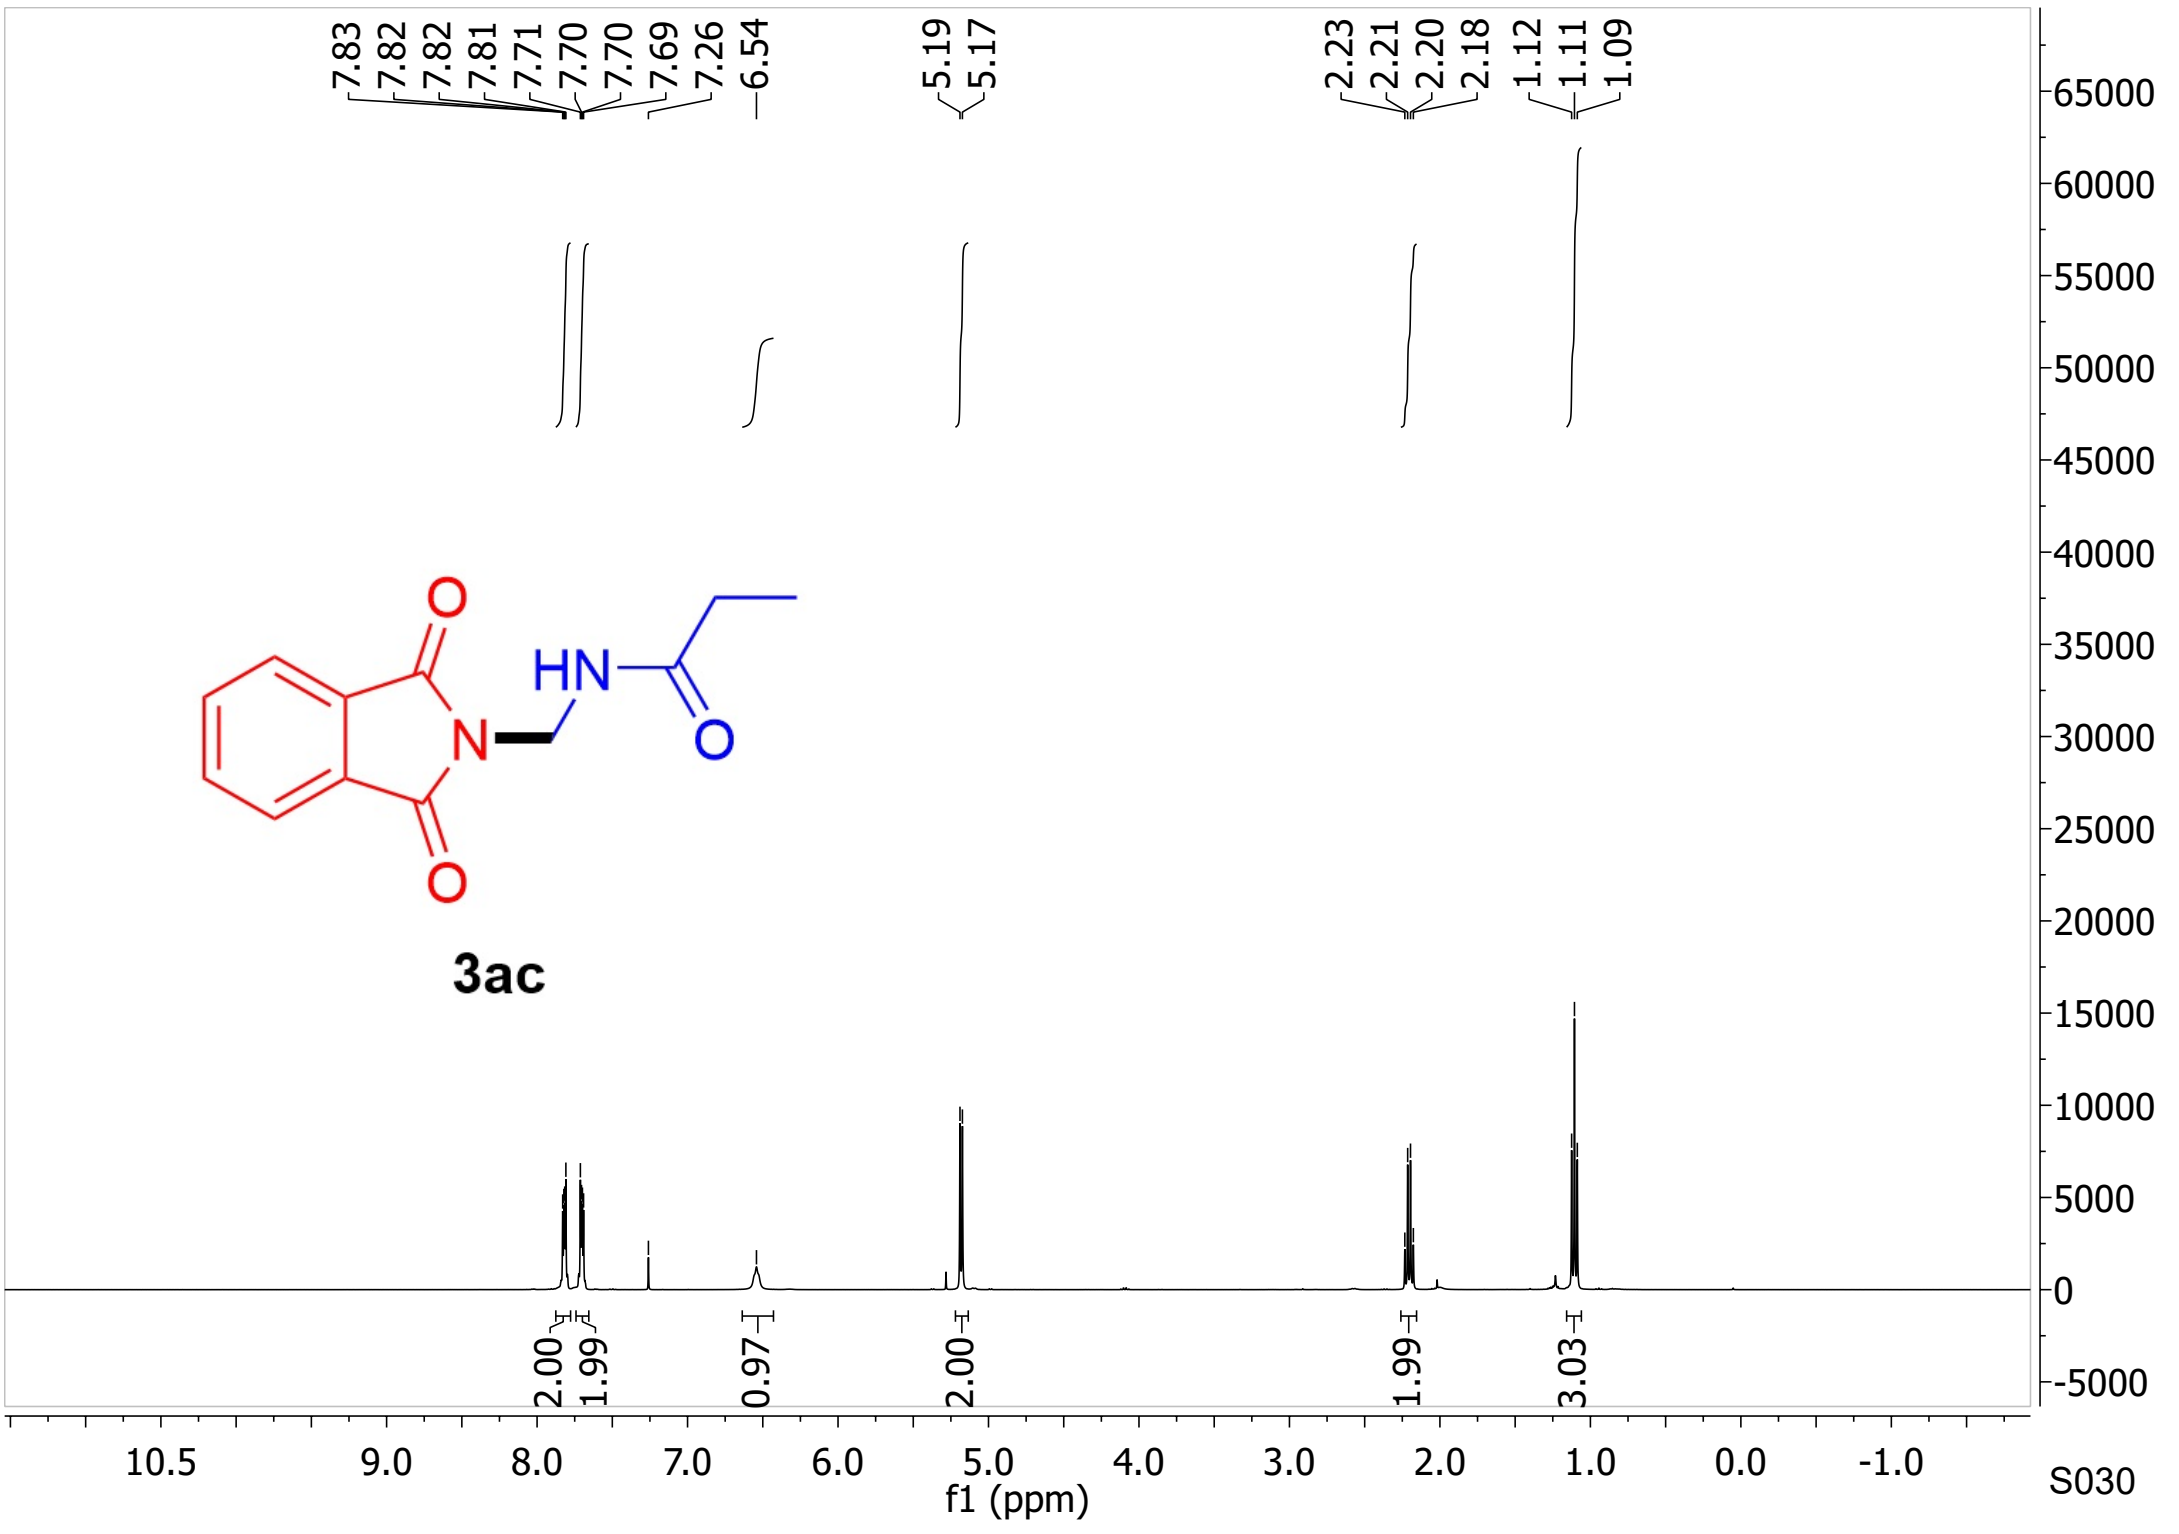

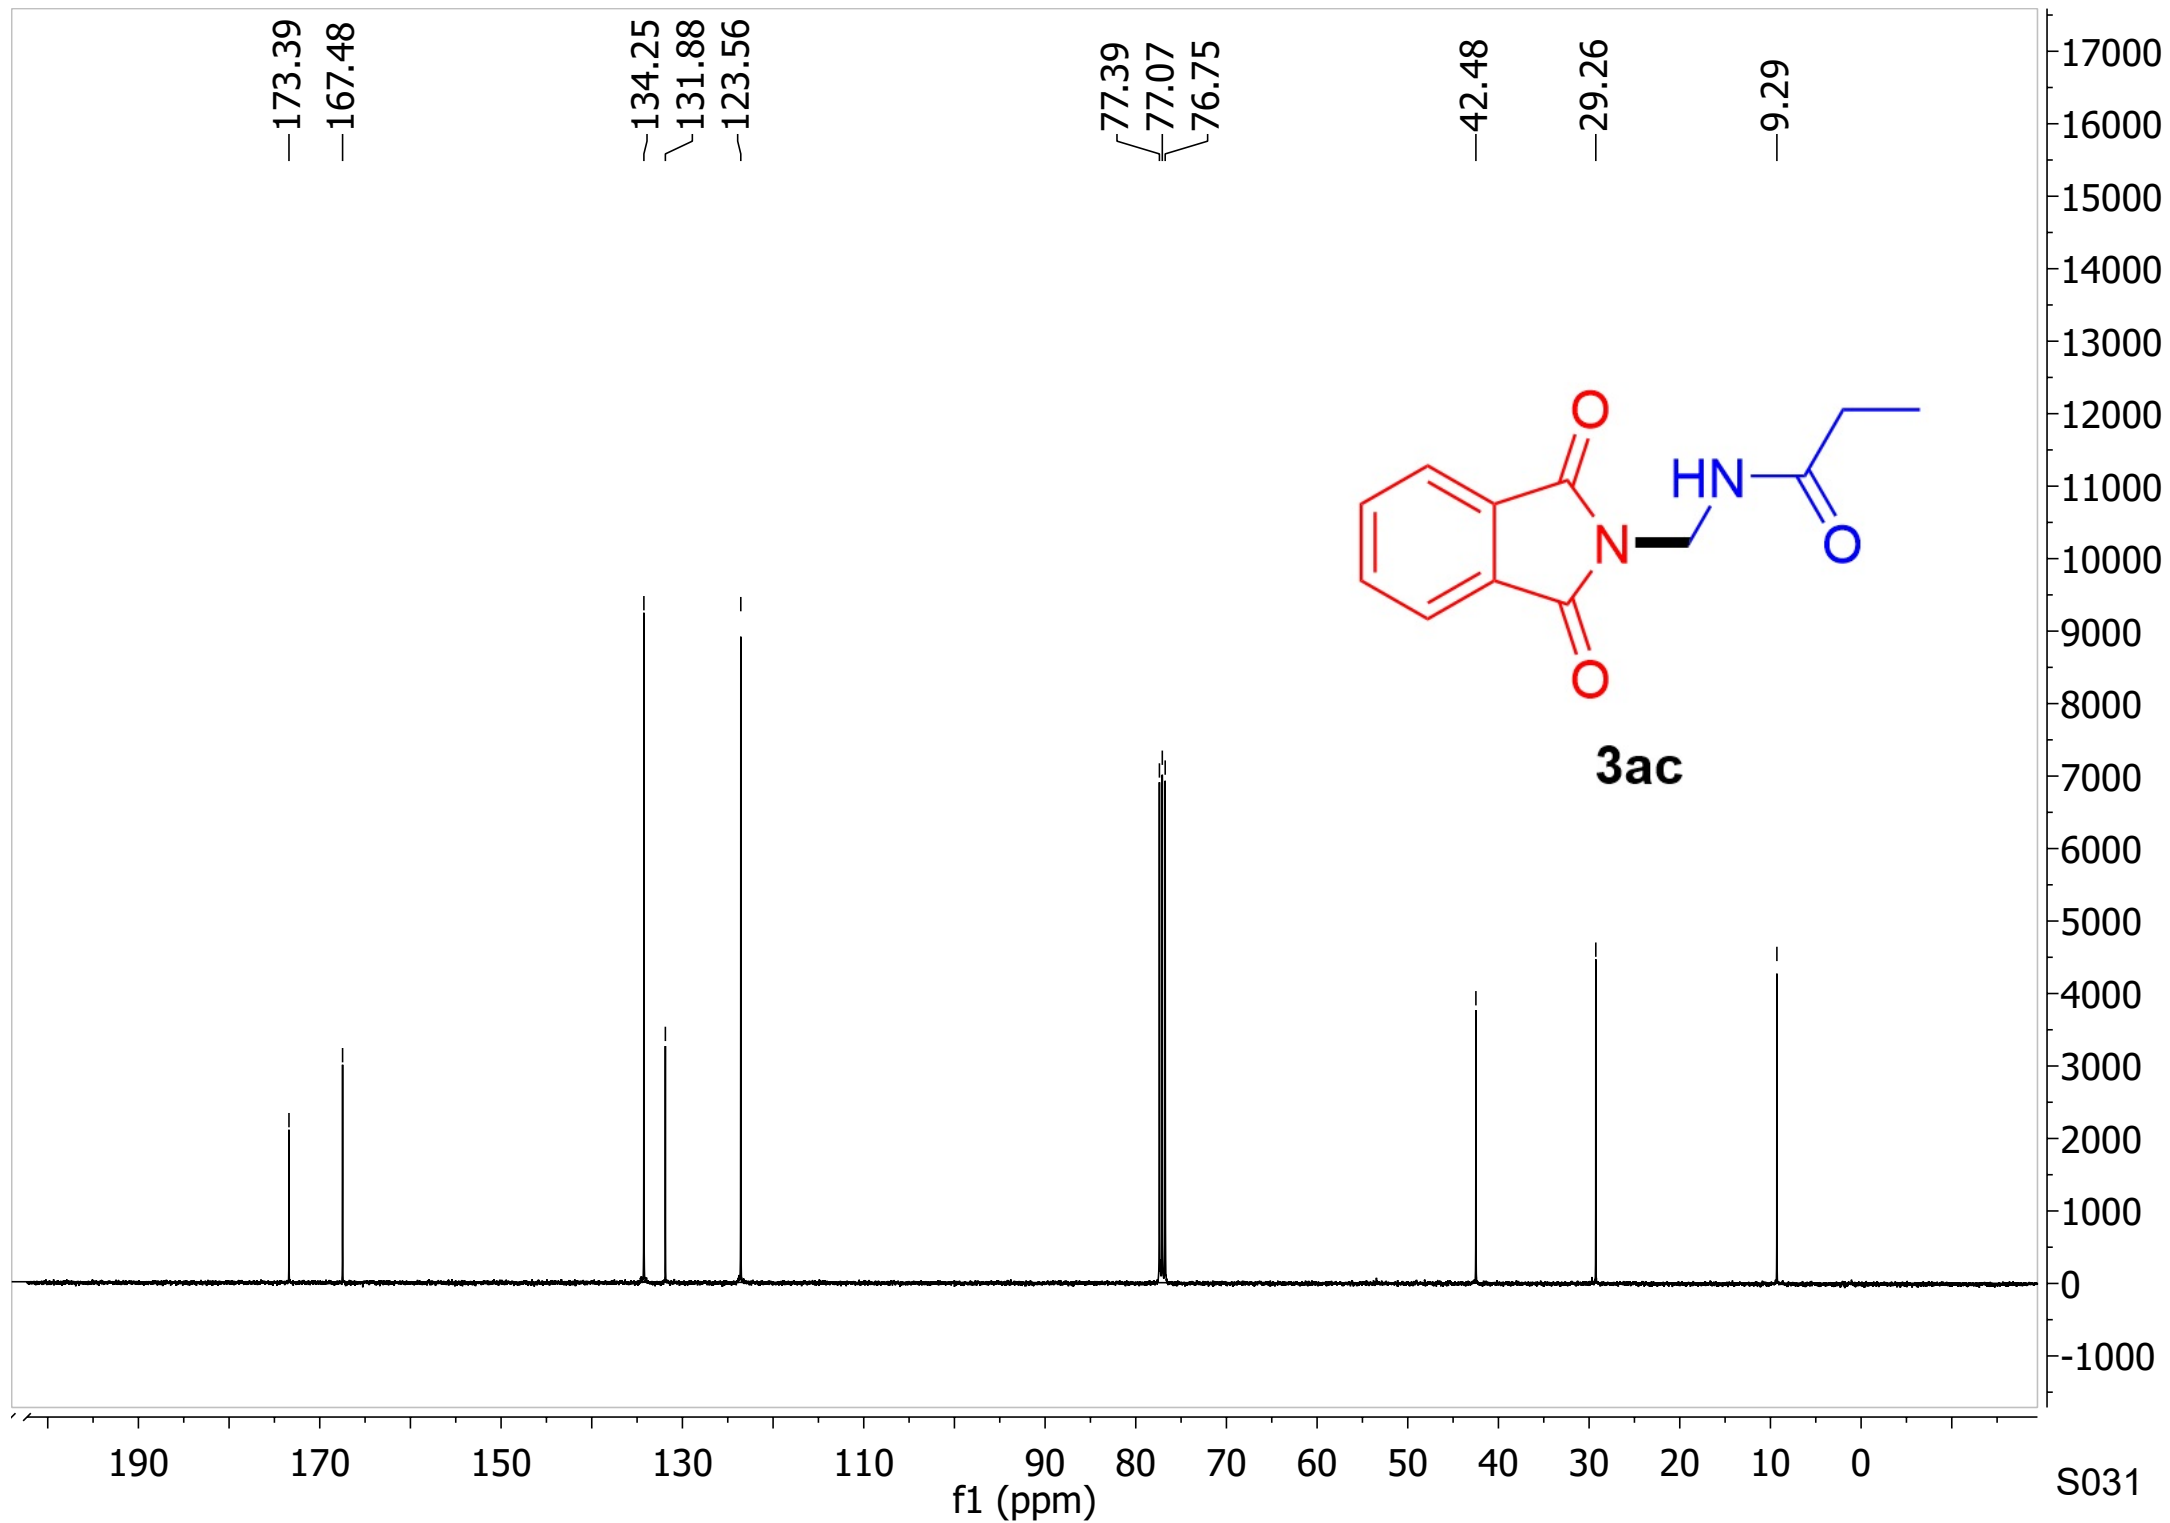

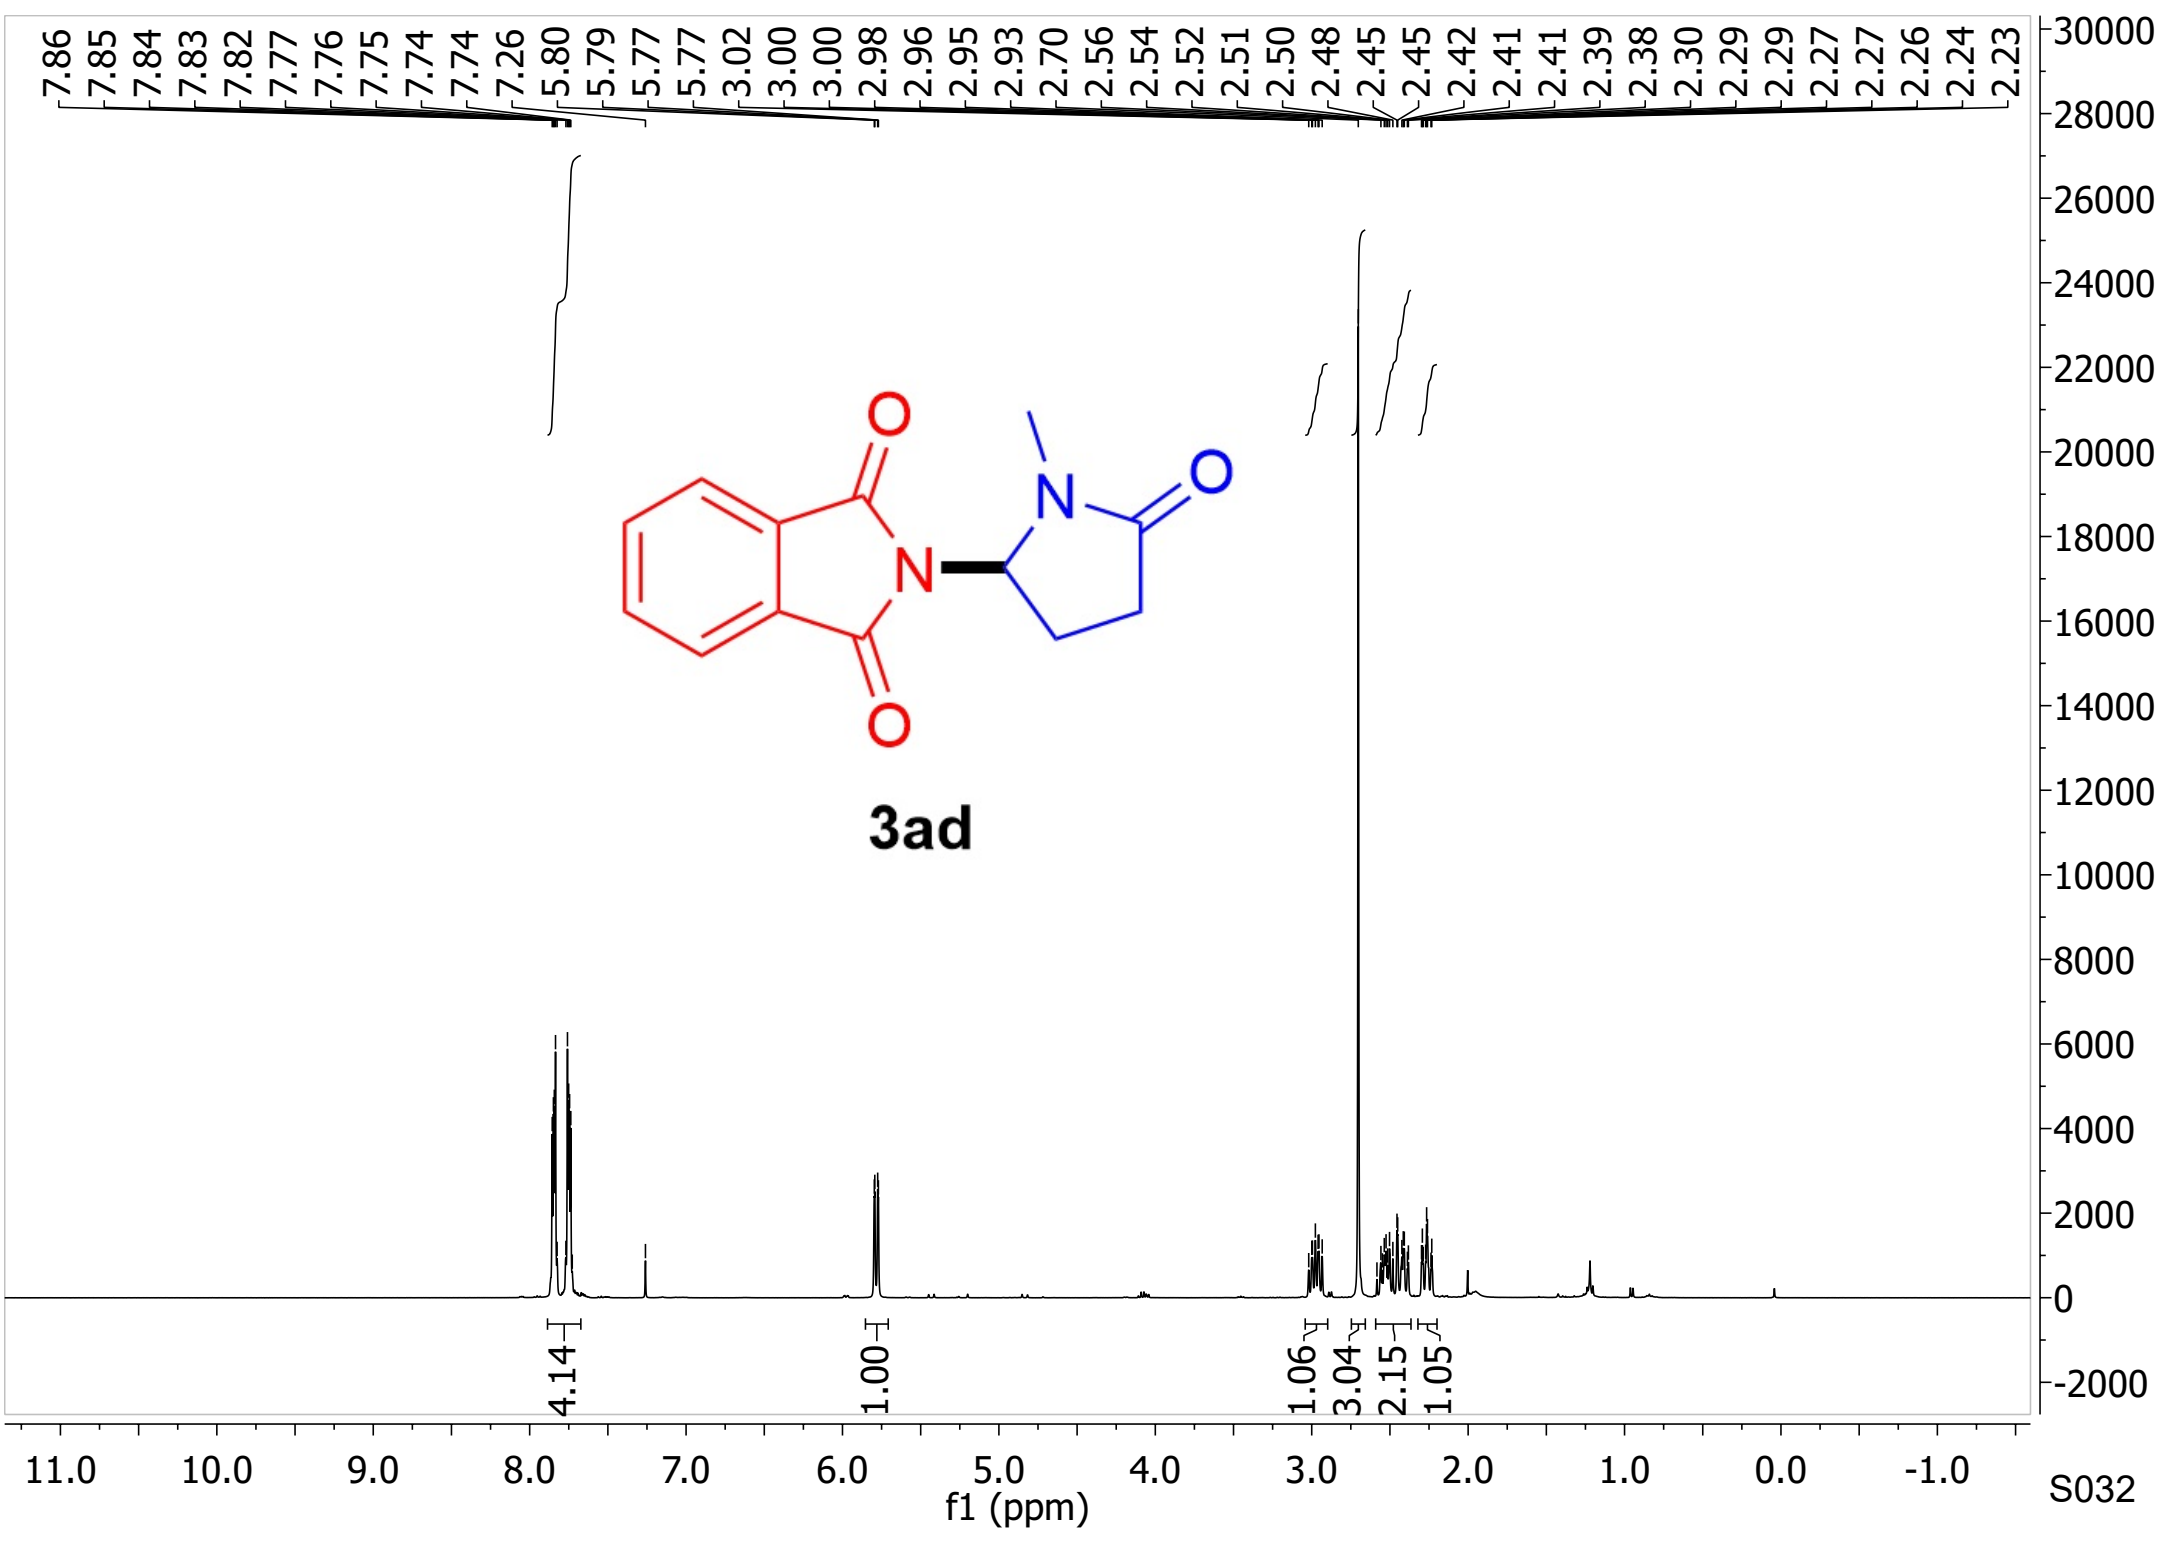

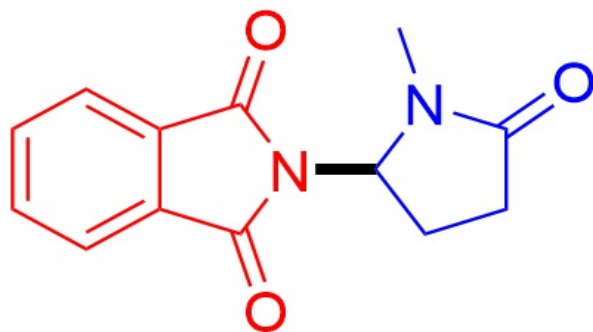

**3ad**

—175.30  
—167.42

—134.58  
^131.49  
—123.68

77.40  
77.08  
76.76  
—65.65

^29.64  
~27.05  
^23.20

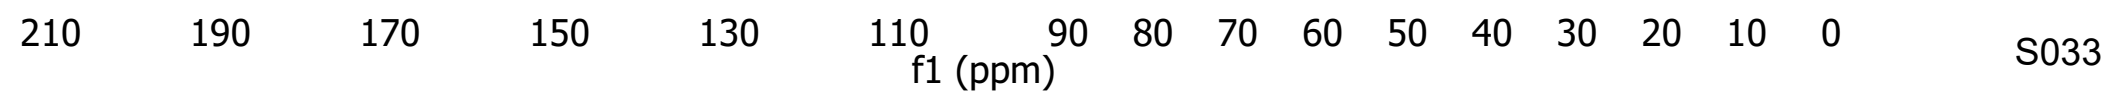

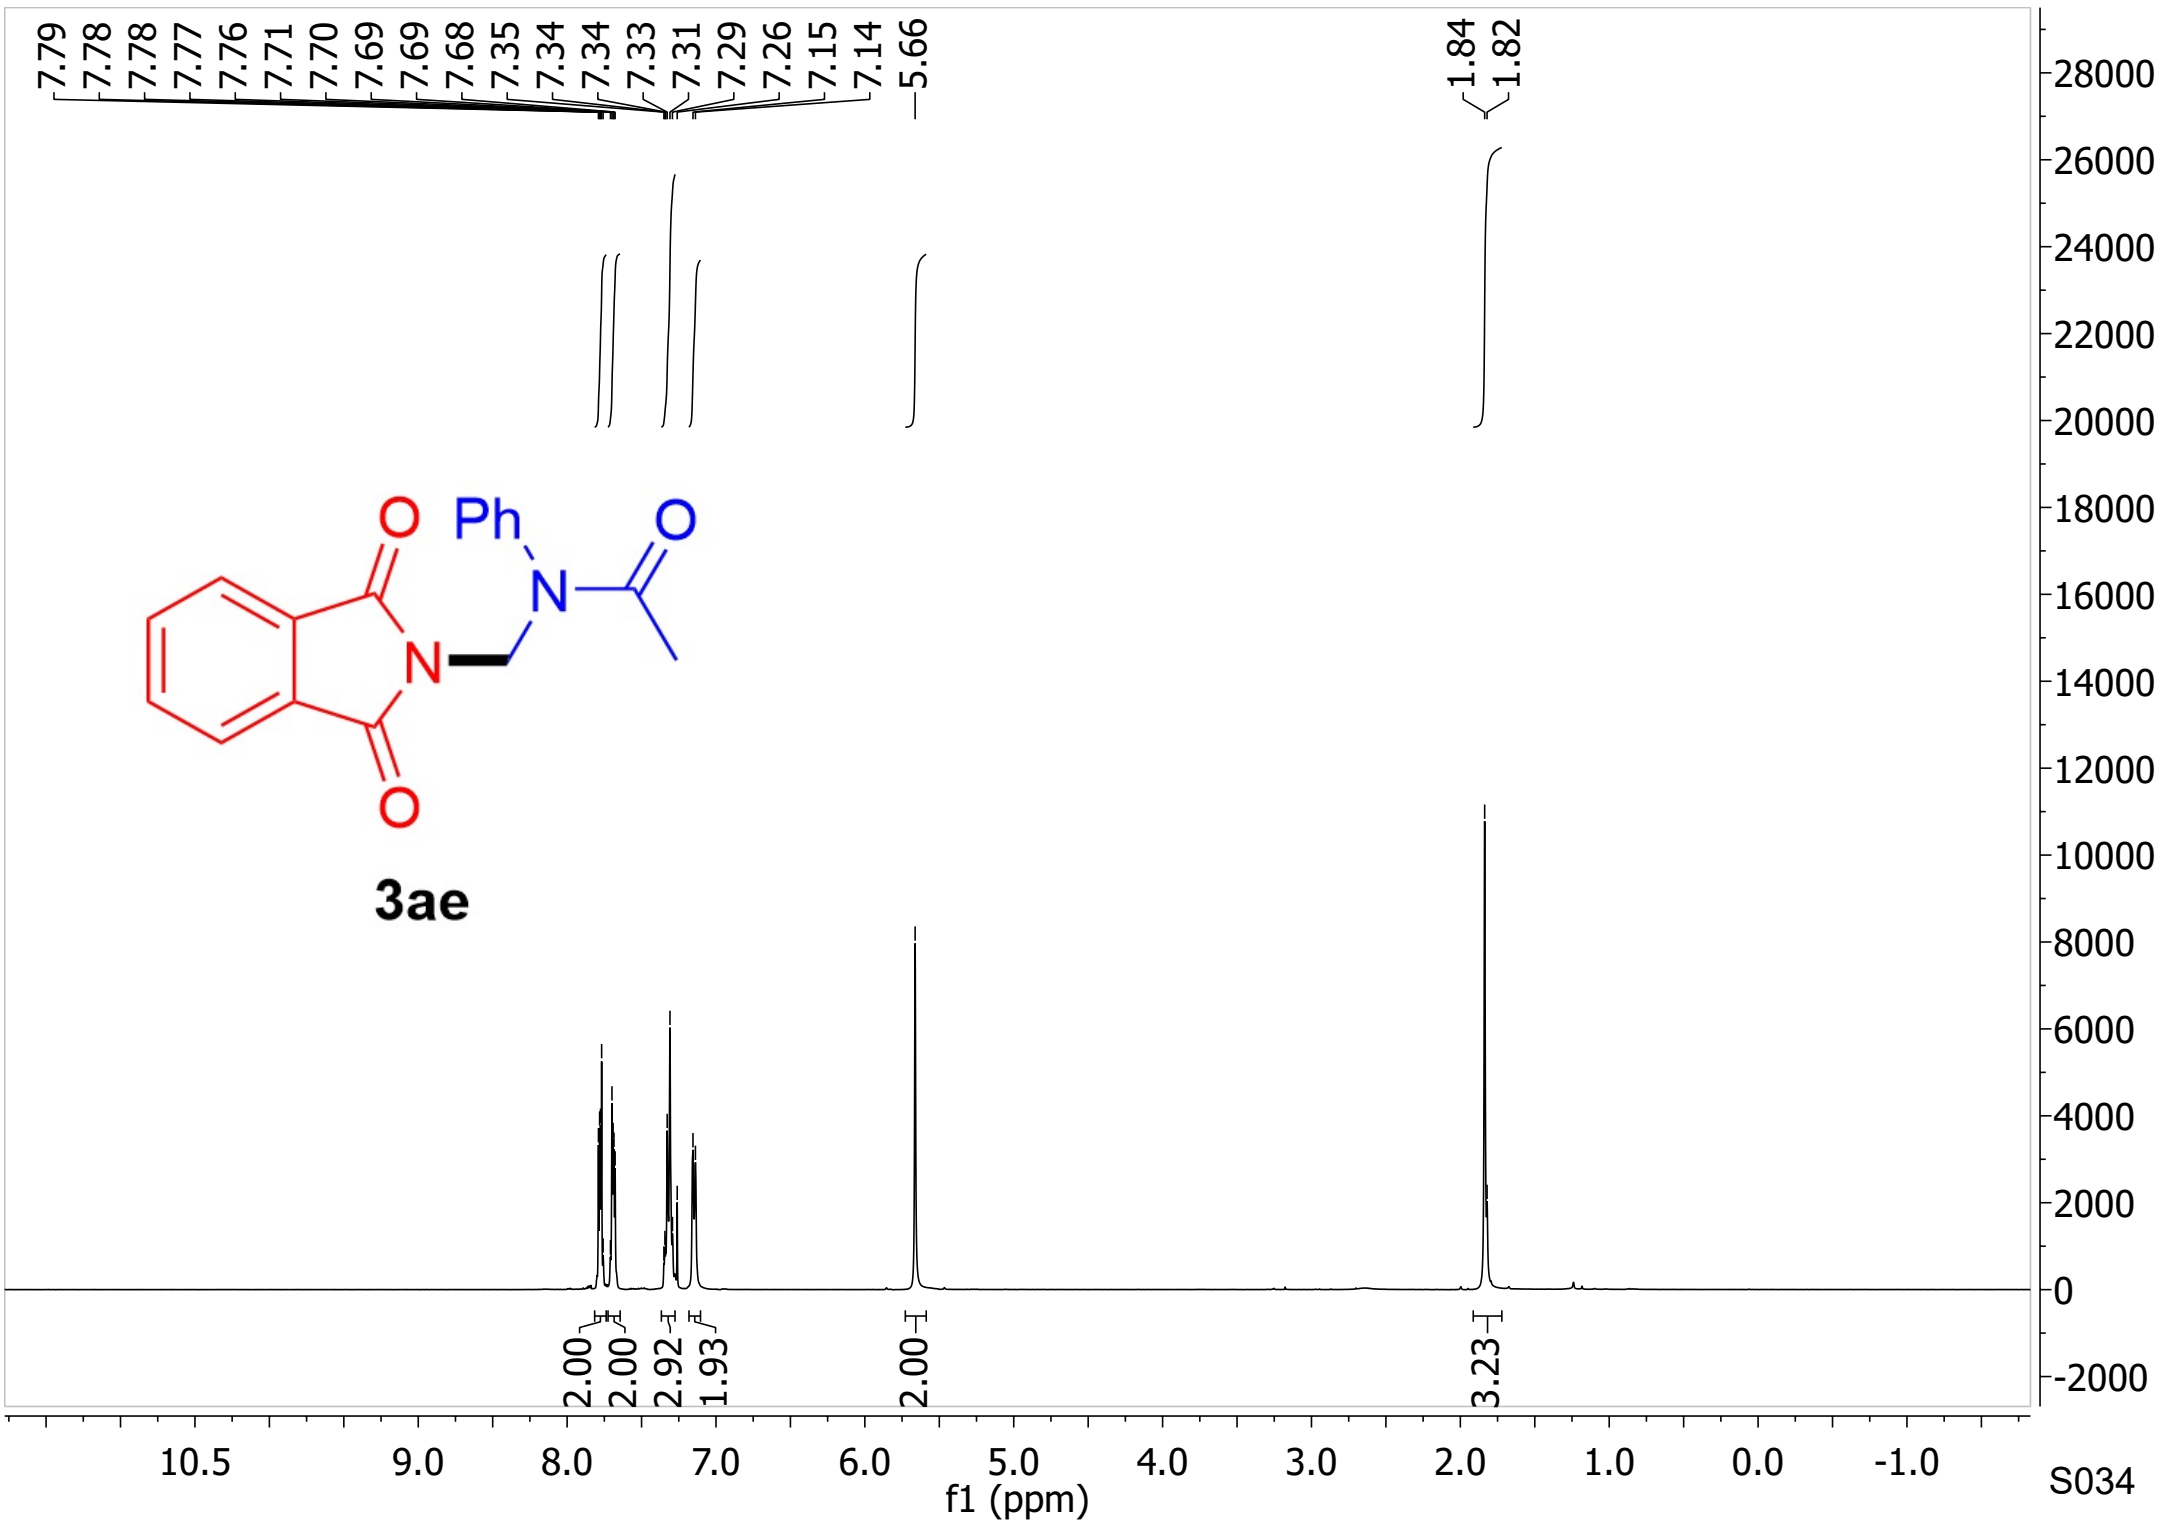

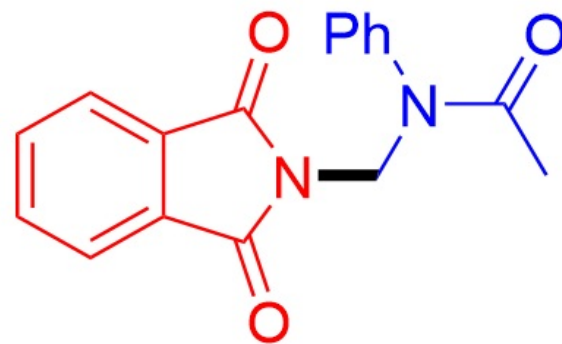

**3ae**

~170.50  
~167.11  
140.38  
134.23  
131.60  
129.75  
128.65  
128.56  
123.56

77.38  
77.07  
76.75

-49.73

-22.77

210 190 170 150 130 110 90 80 70 60 50 40 30 20 10 0

f1 (ppm)

10000  
9000  
8000  
7000  
6000  
5000  
4000  
3000  
2000  
1000  
0  
-1000

S035



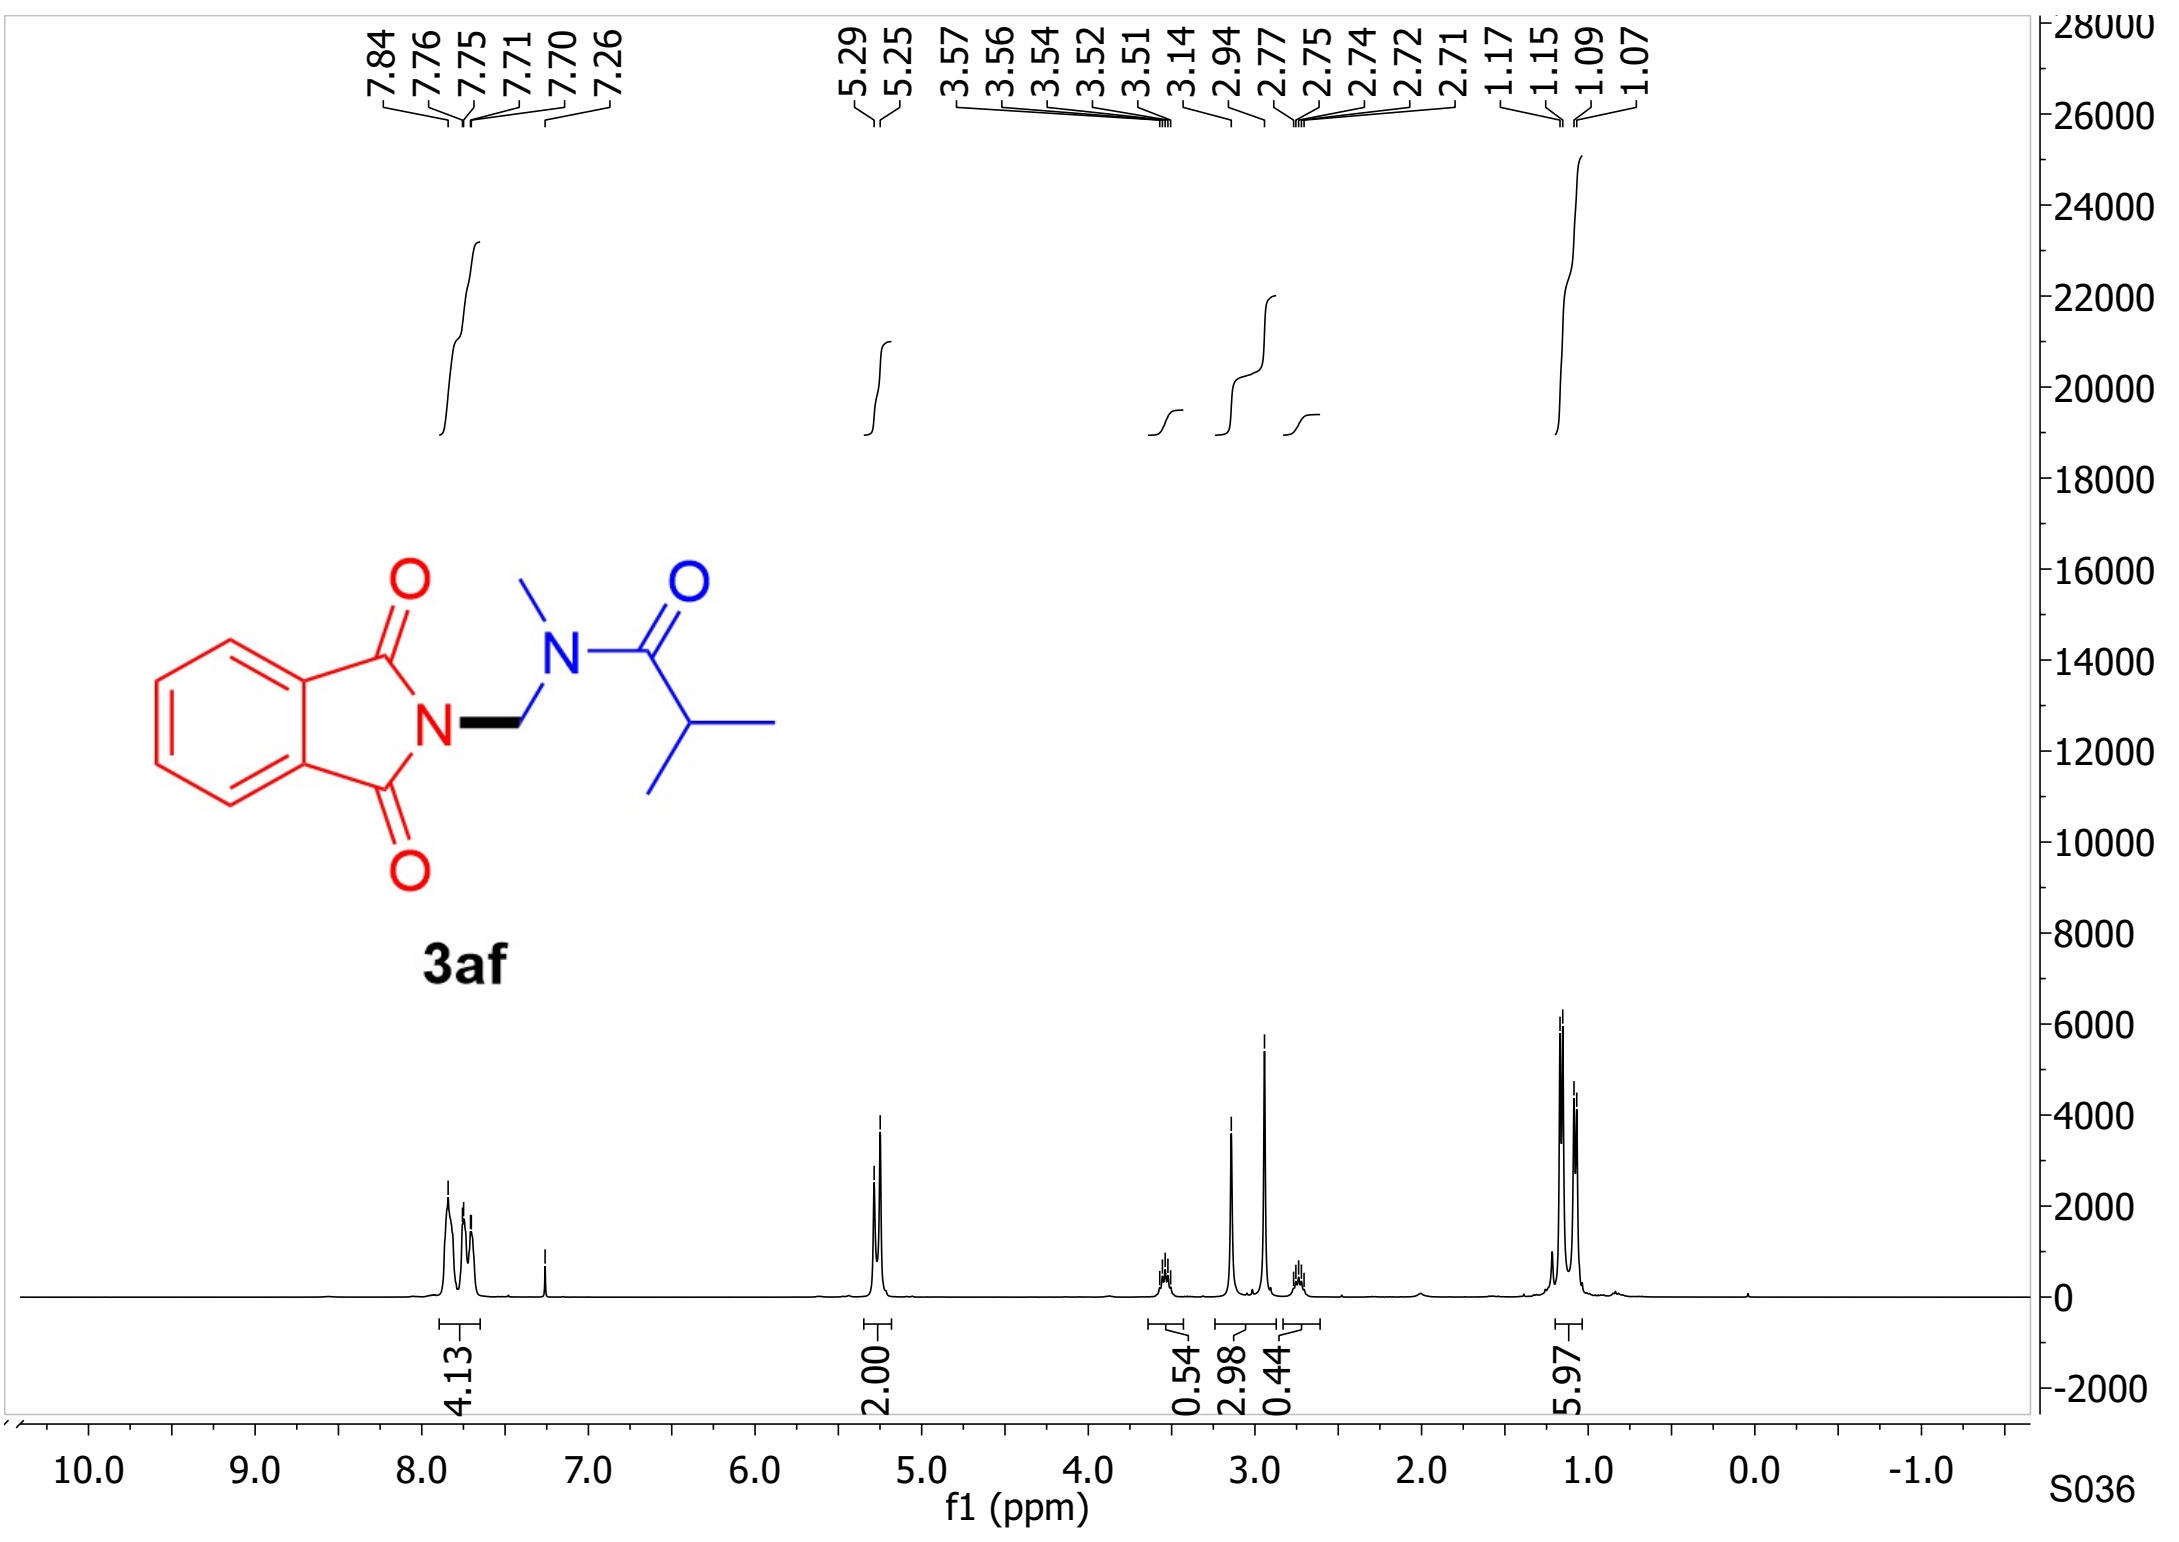

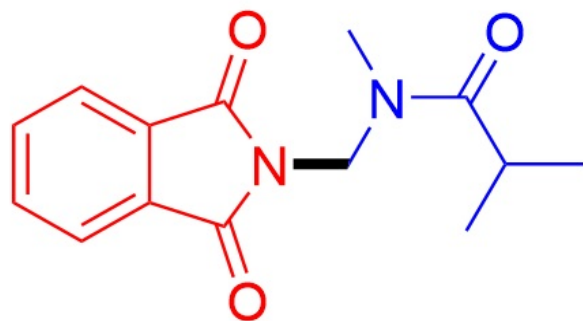

**3af**

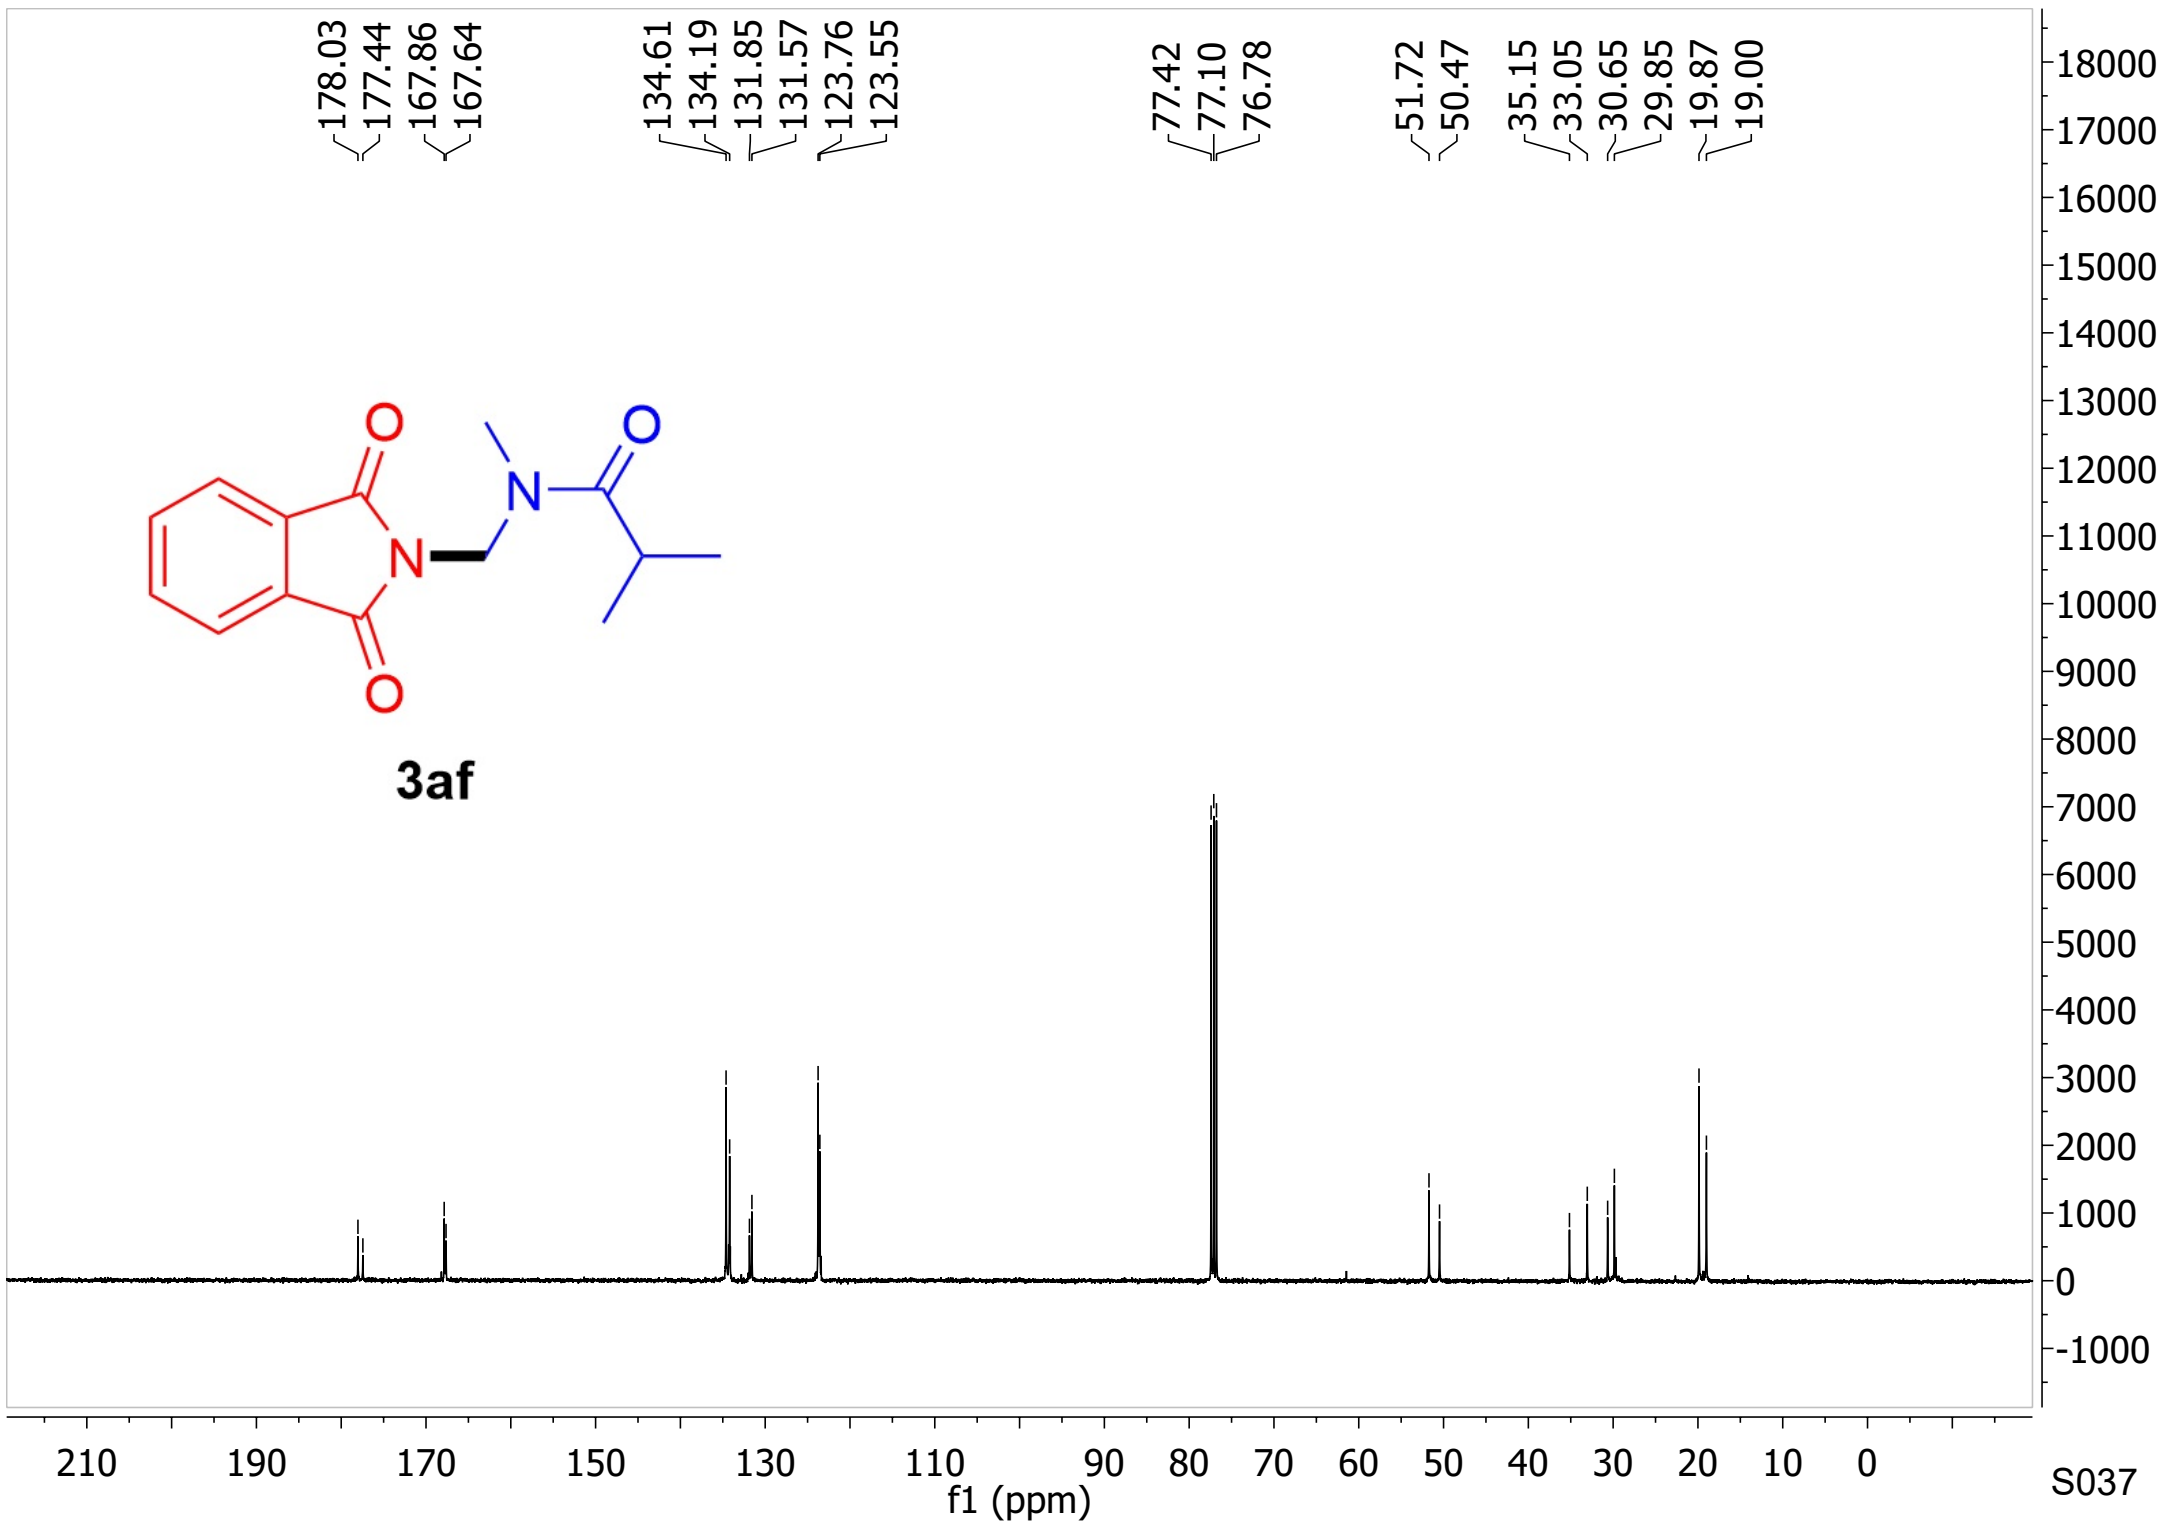

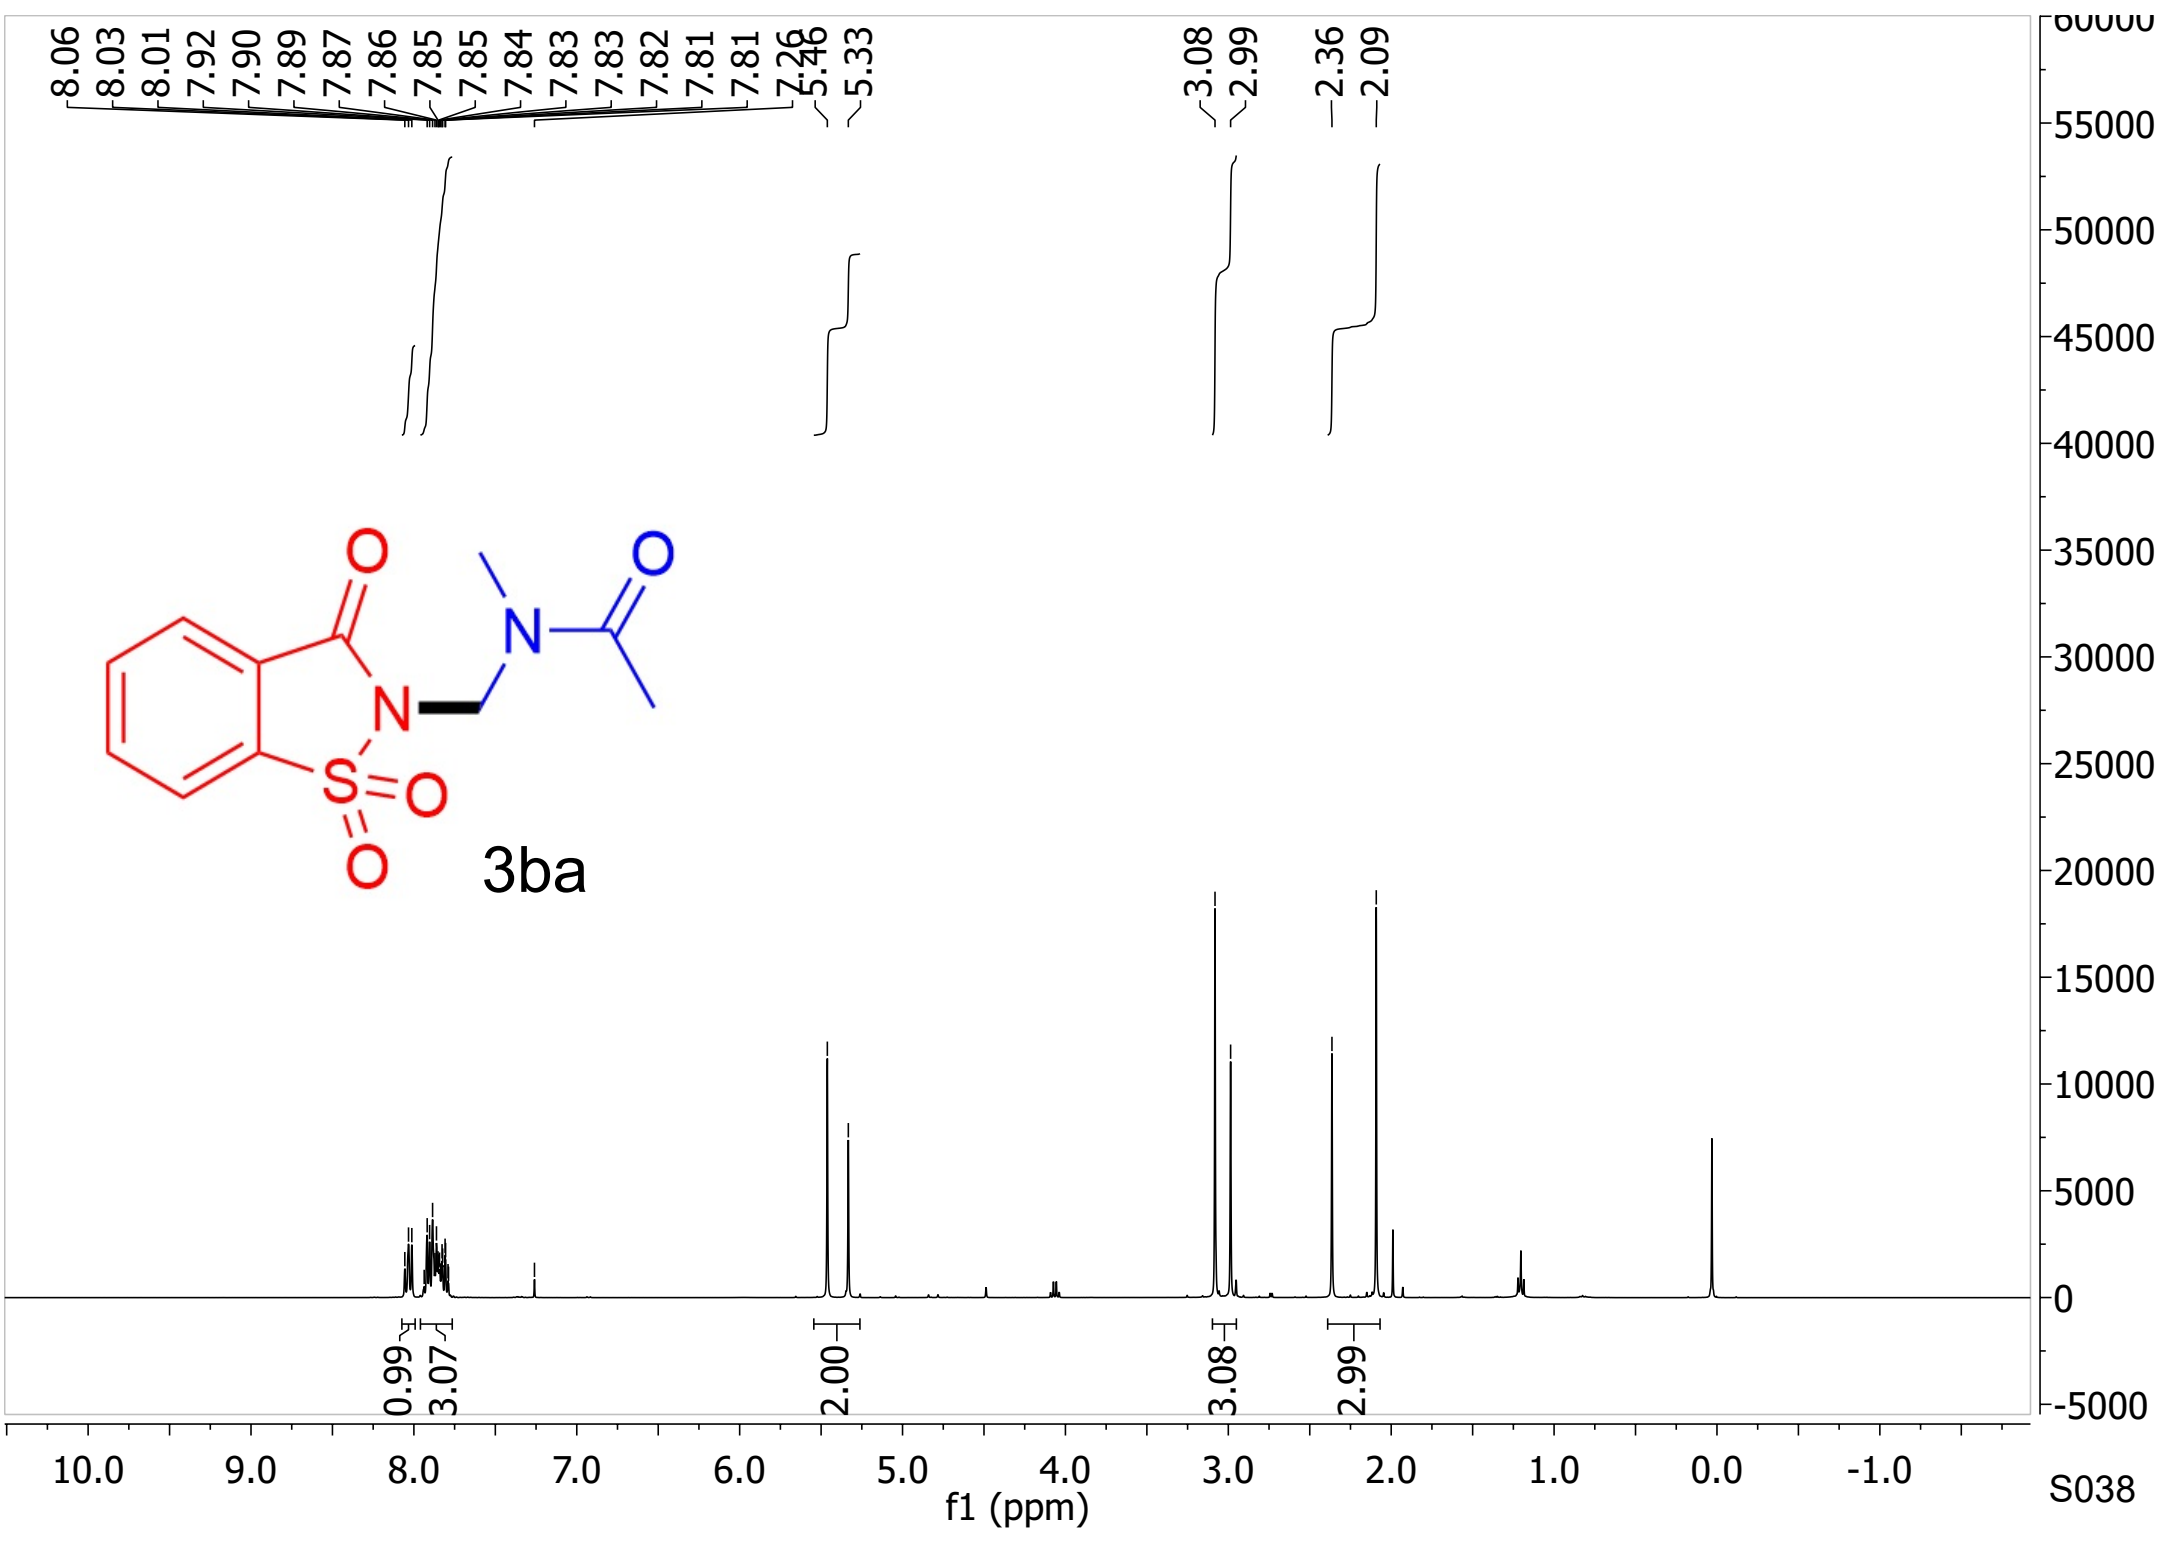

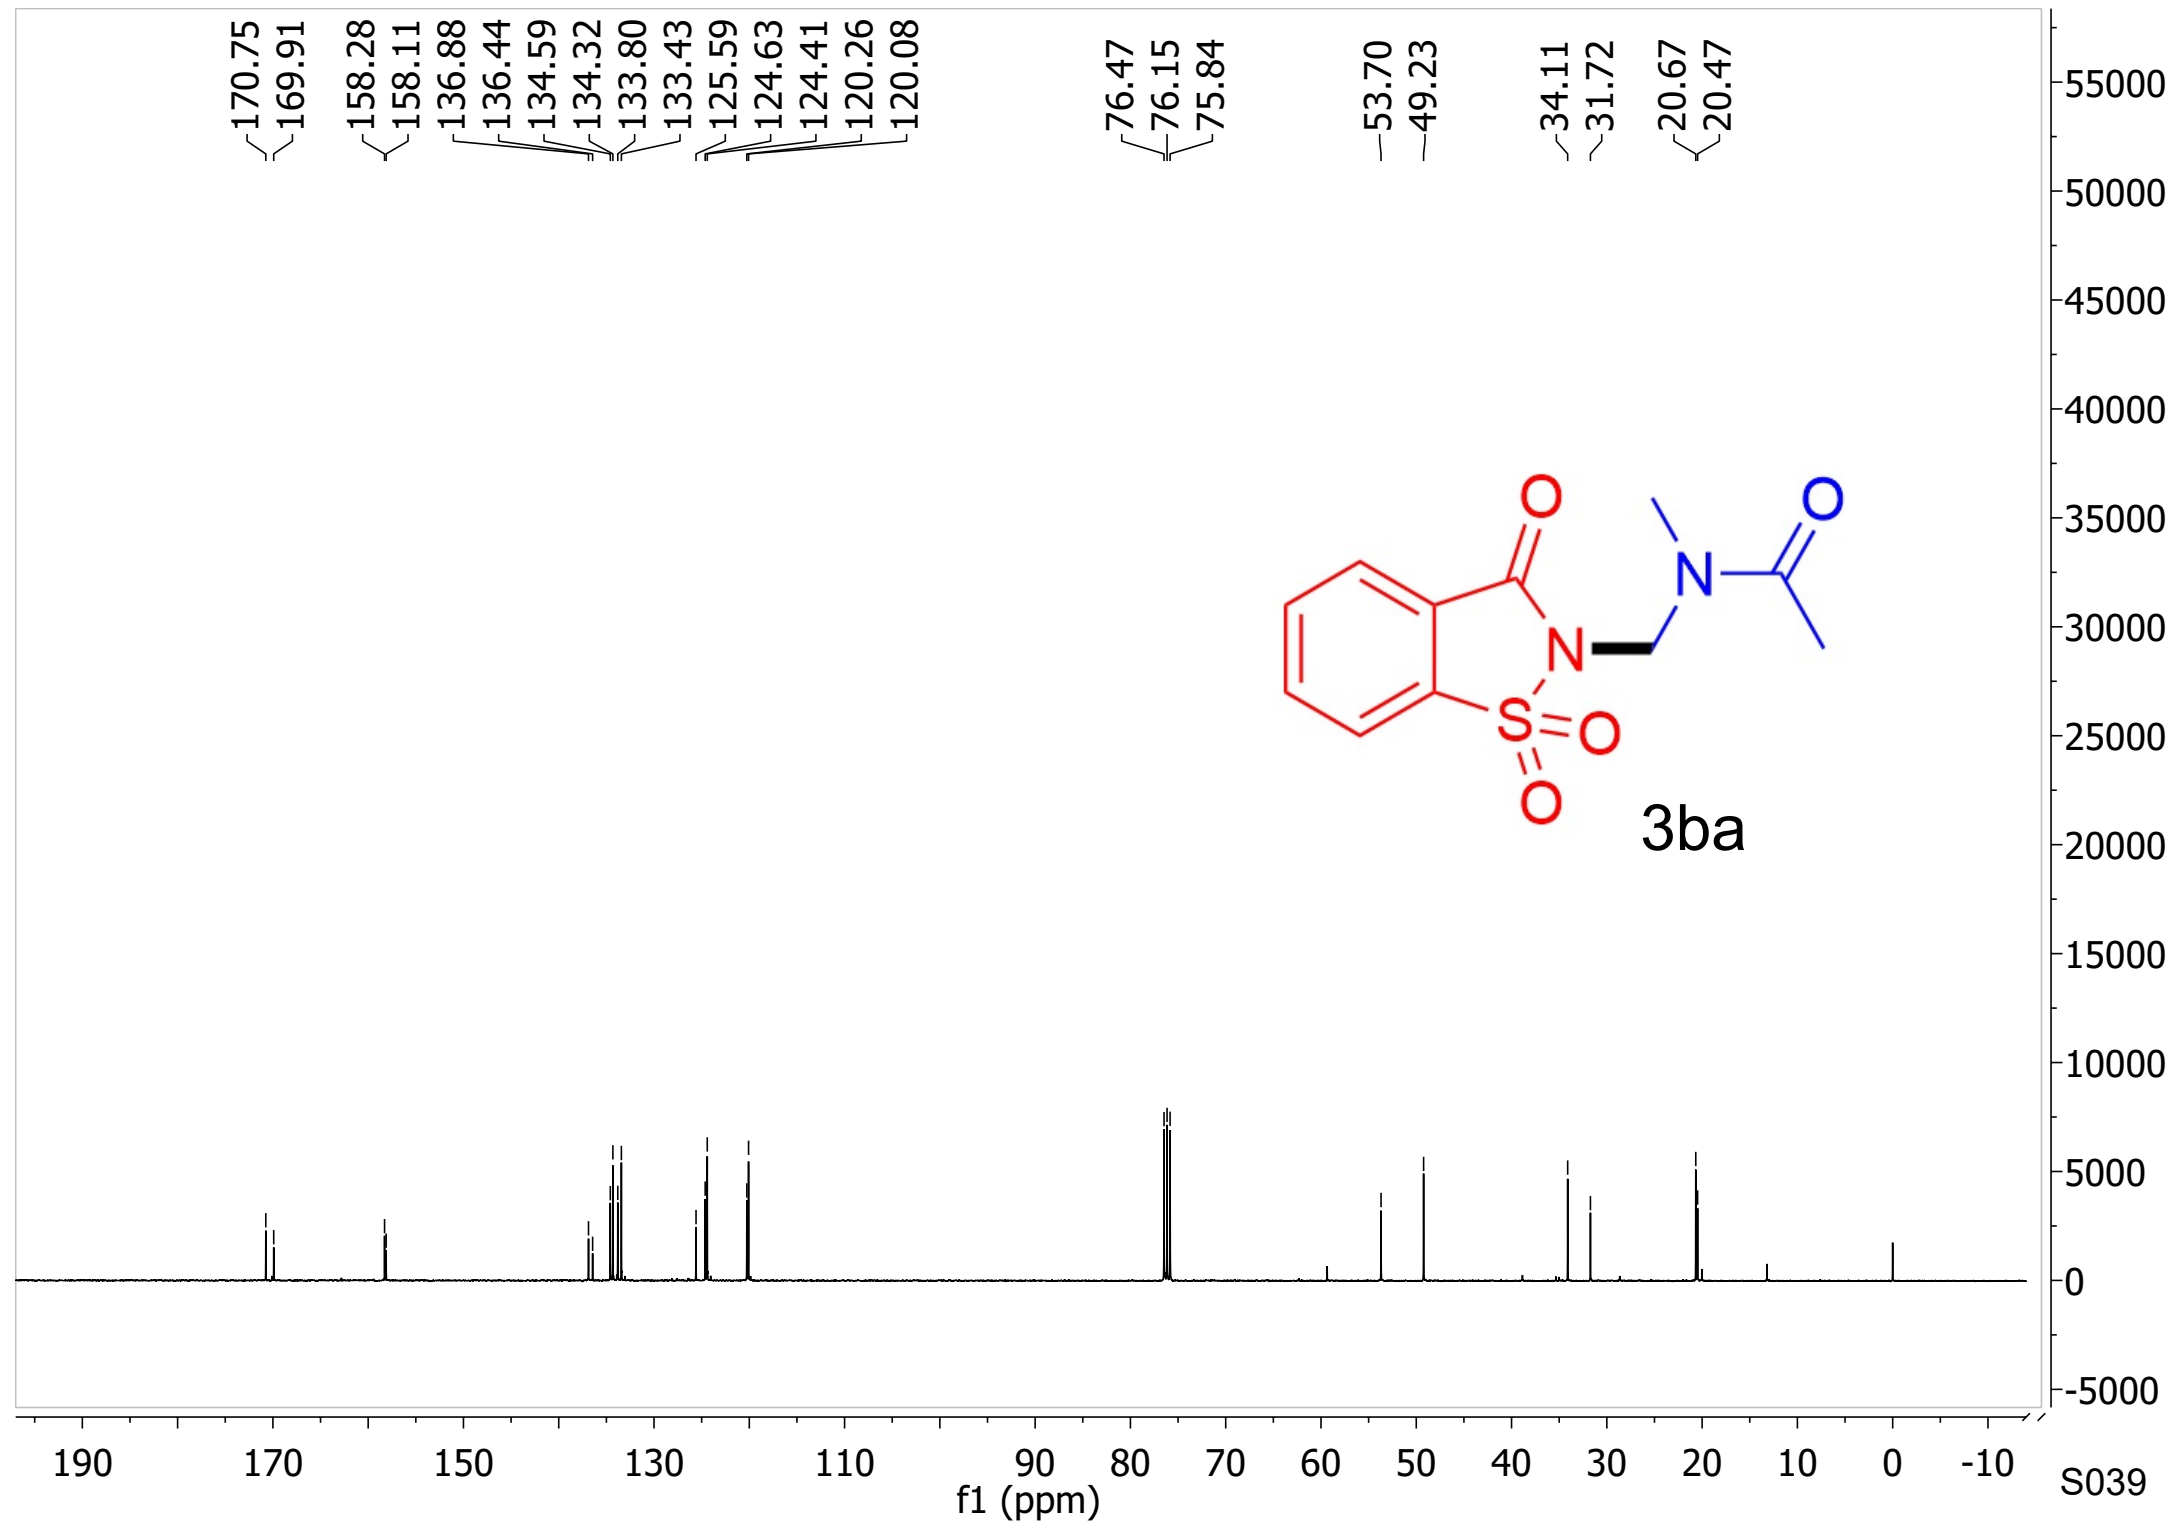

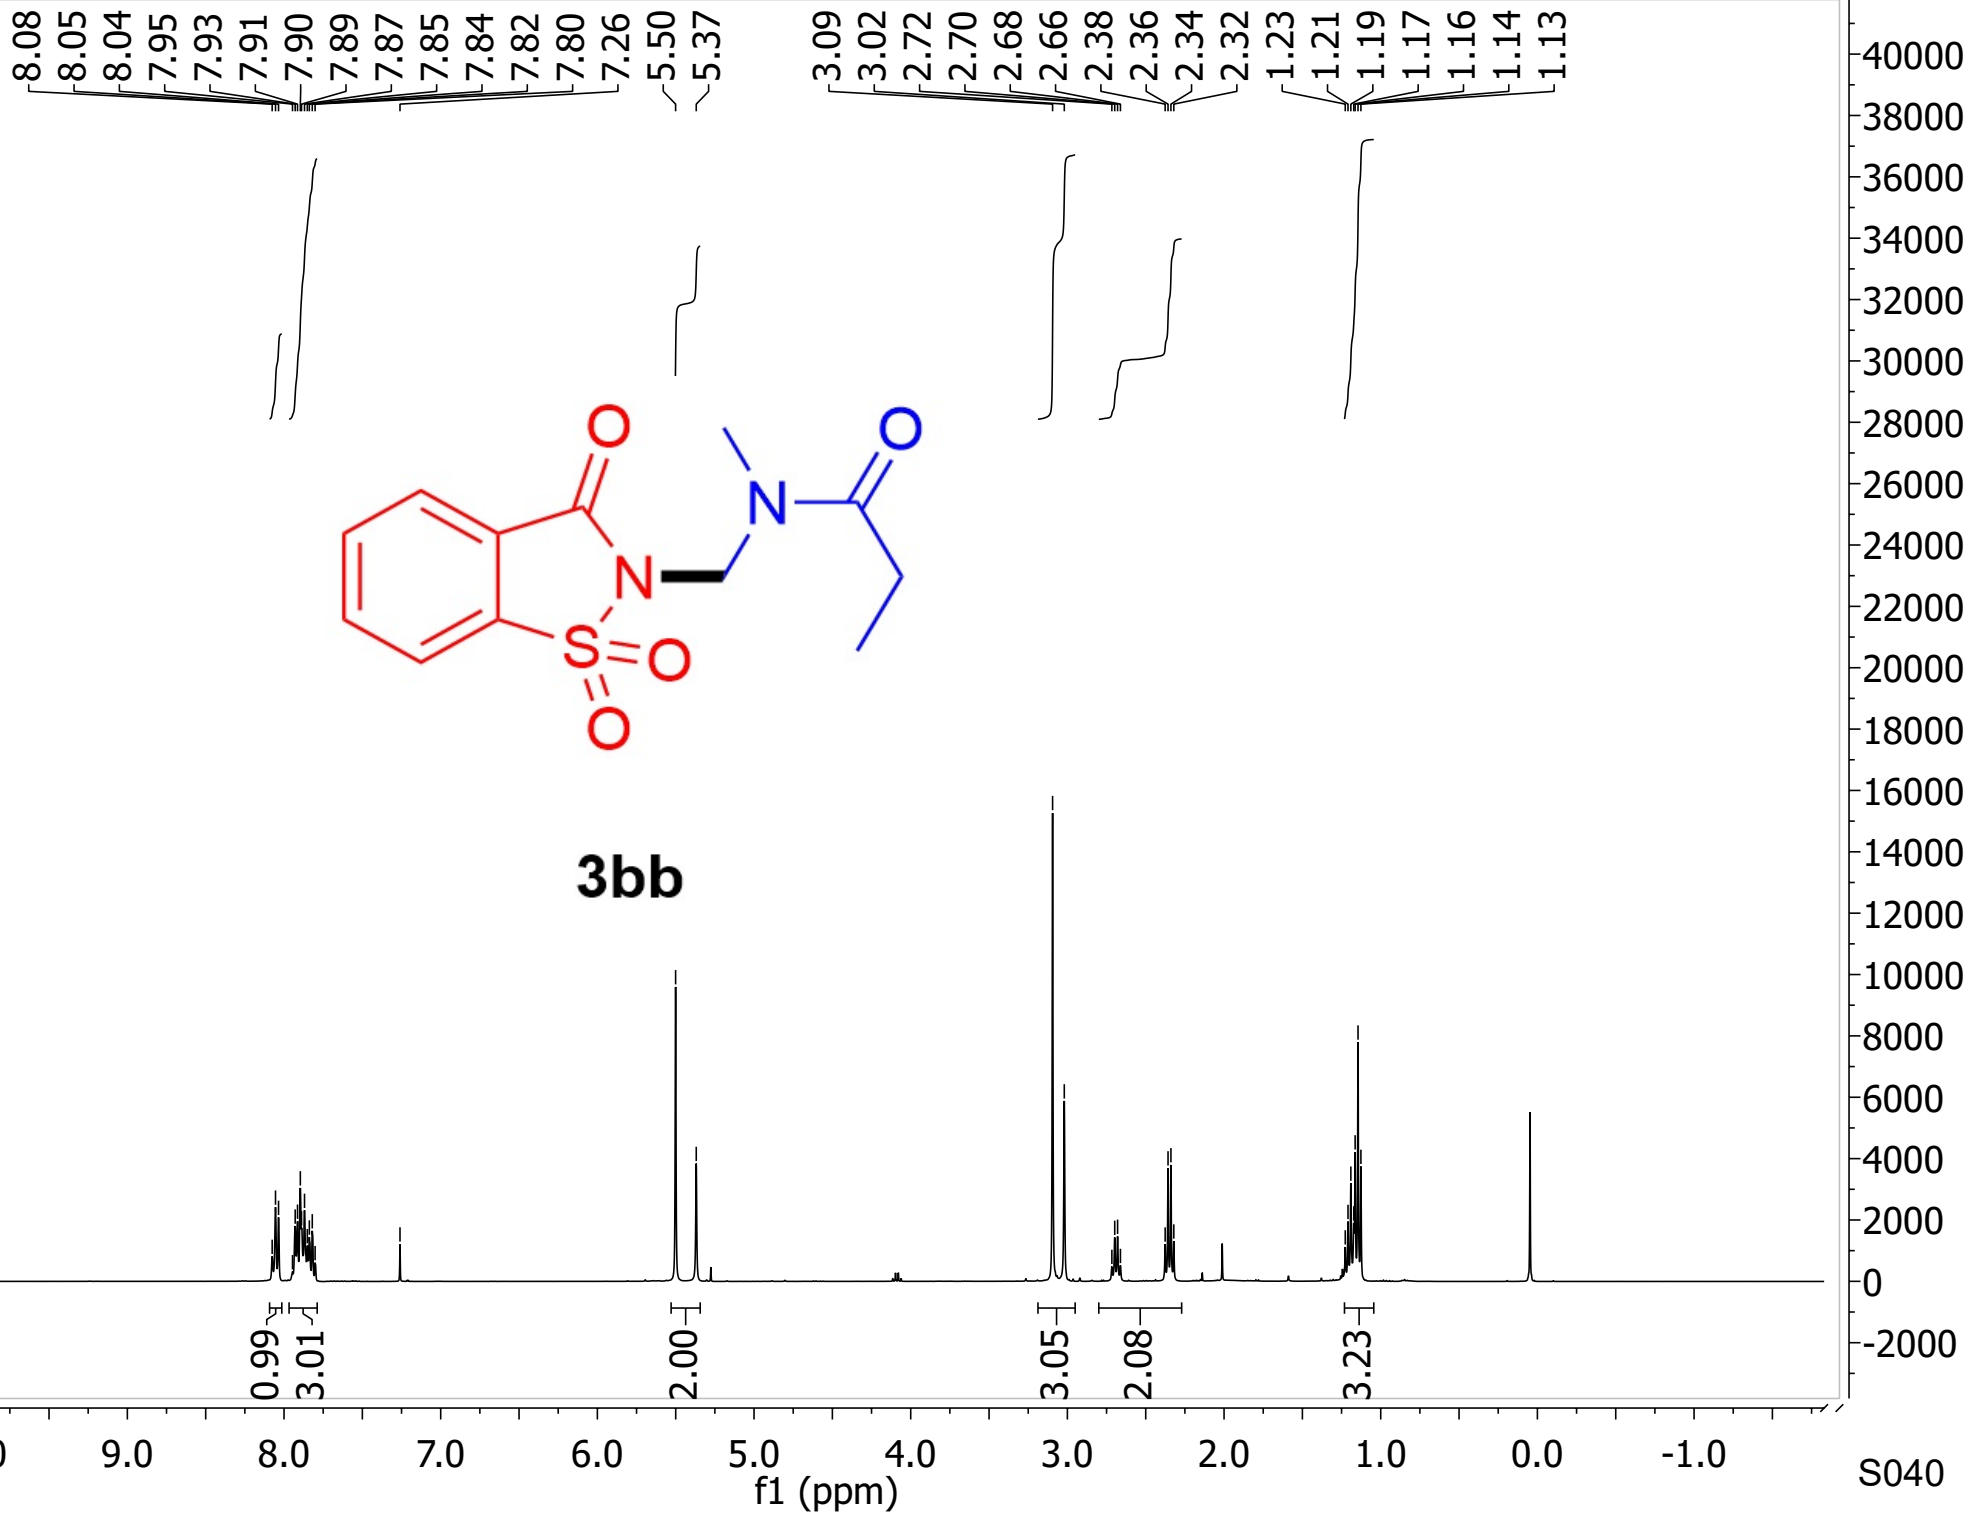

173.81  
173.06  
158.24  
158.13  
136.93  
136.50  
134.52  
134.22  
133.75  
133.36  
125.68  
124.62  
124.41  
120.22  
120.03

76.40  
76.09  
75.77

52.80  
49.73

33.36  
31.97  
25.65  
25.16

8.35  
7.78

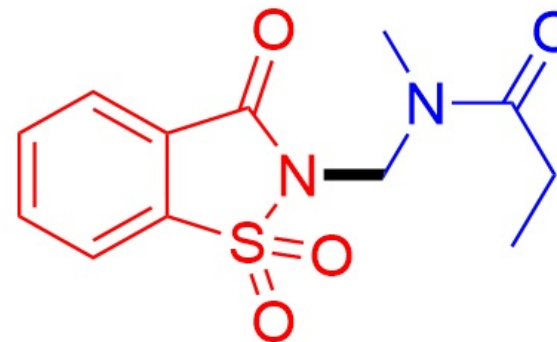

**3b**

190 170 150 130 110 90 80 70 60 50 40 30 20 10 0 -10

f1 (ppm)

S041

32000  
30000  
28000  
26000  
24000  
22000  
20000  
18000  
16000  
14000  
12000  
10000  
8000  
6000  
4000  
2000  
0  
-2000

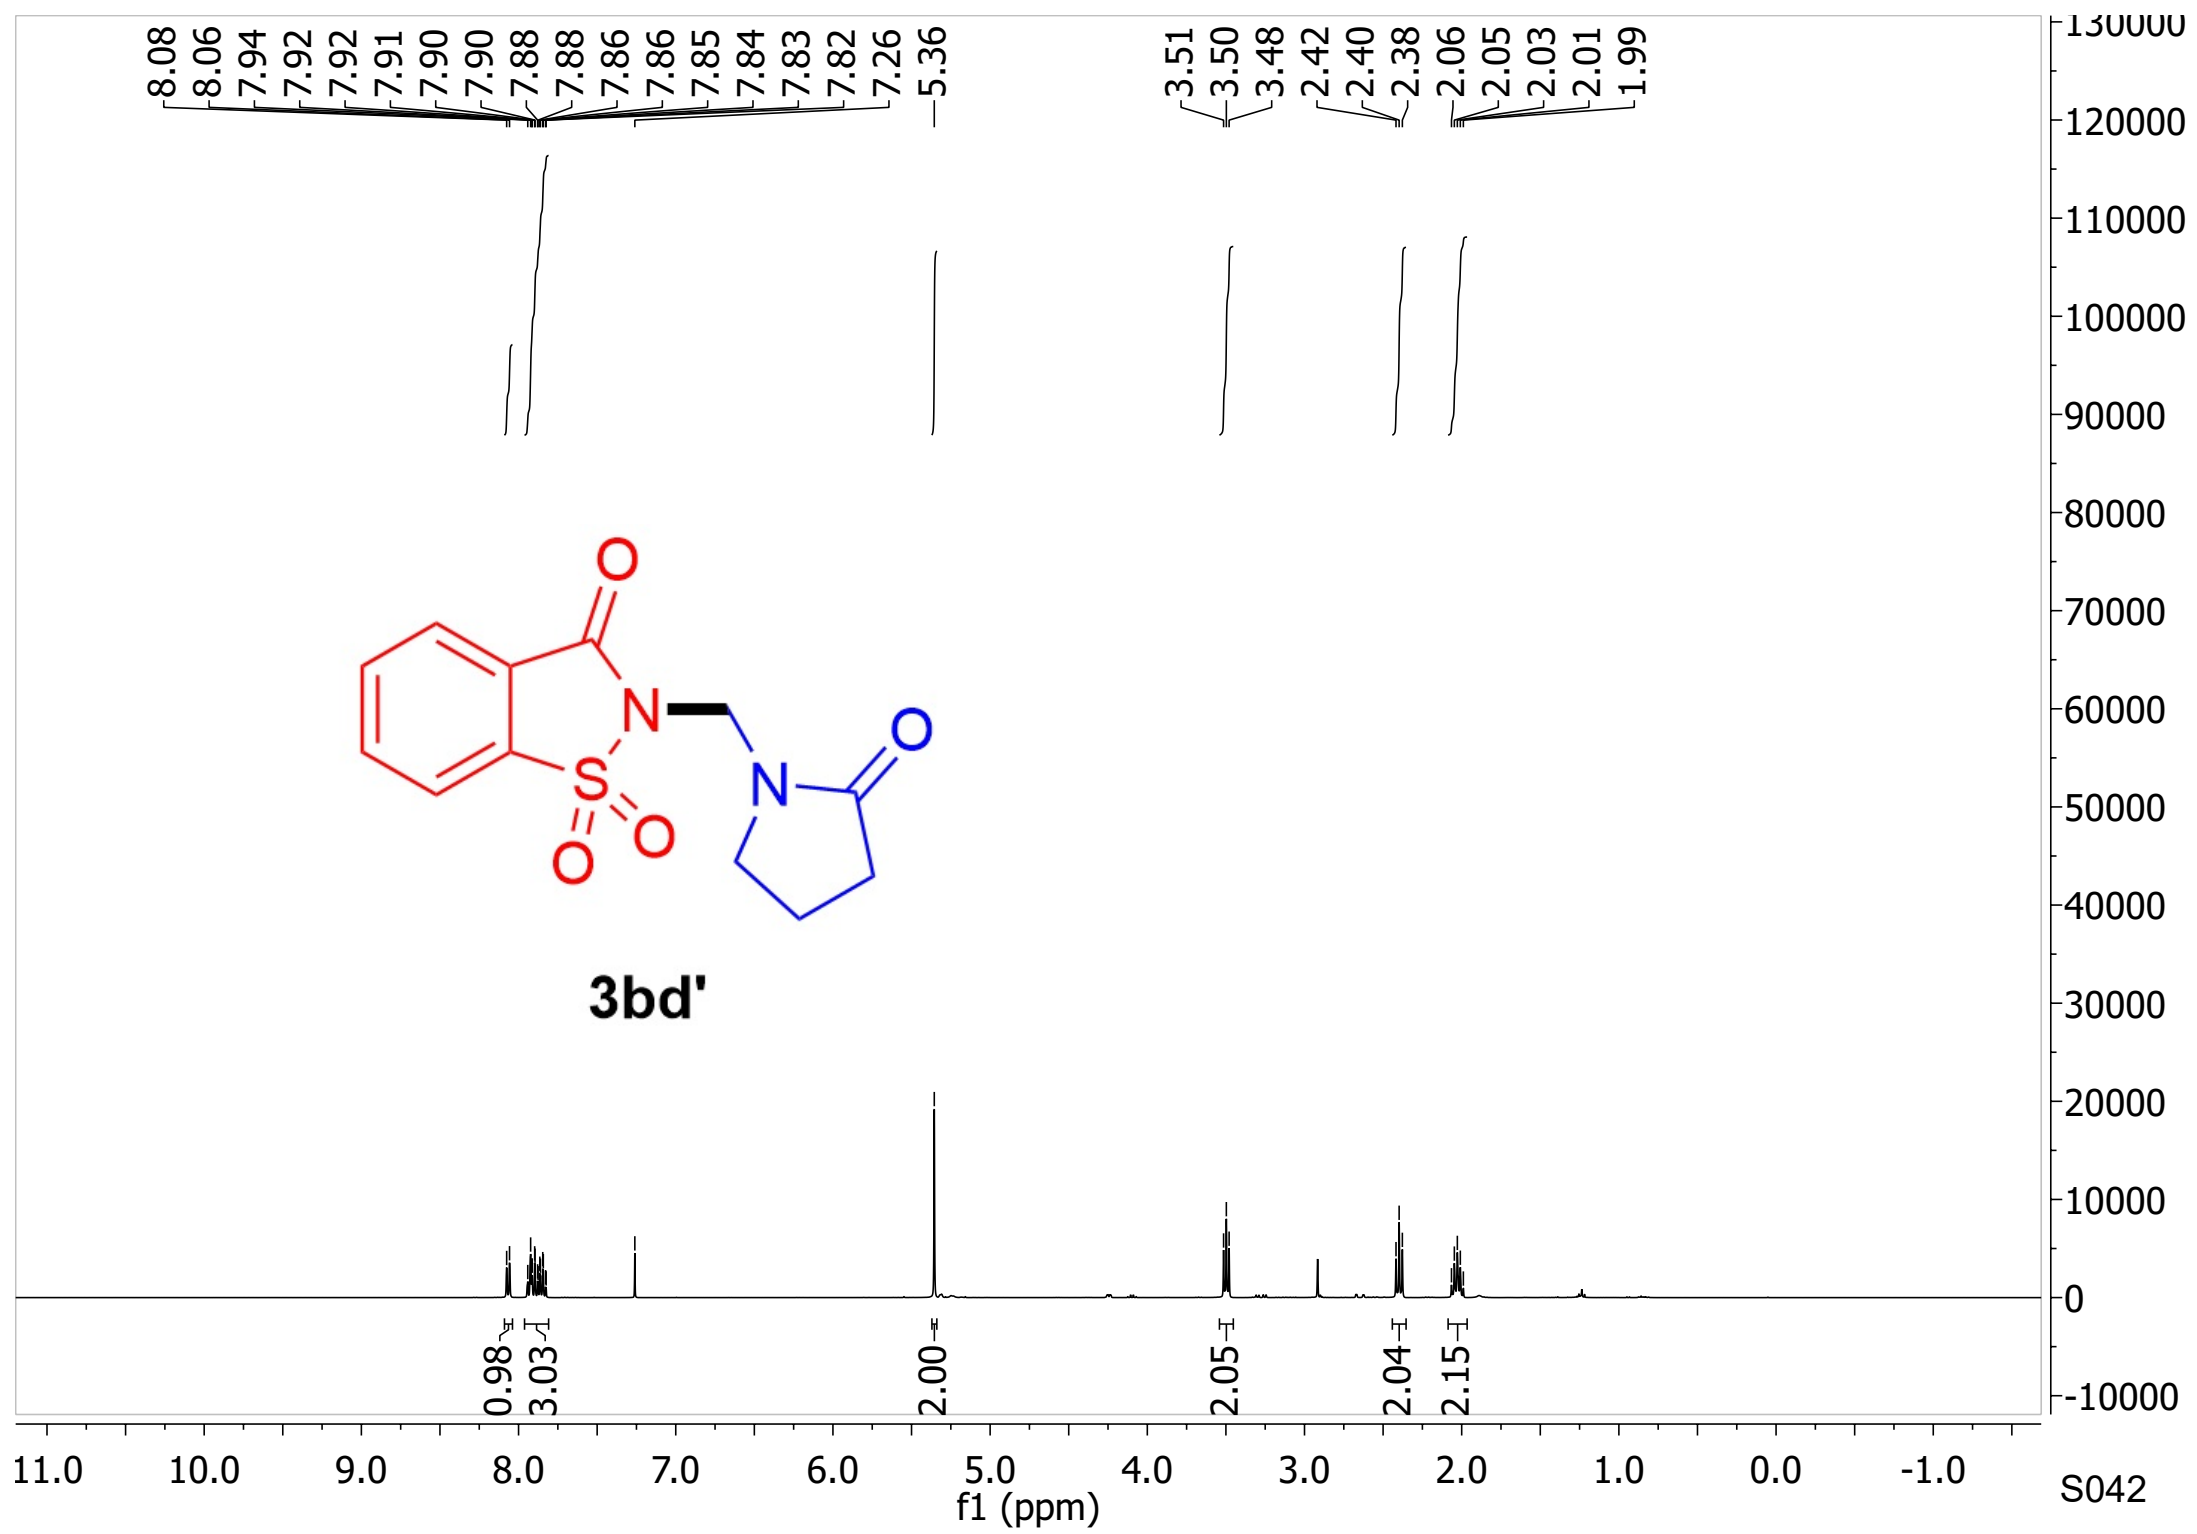

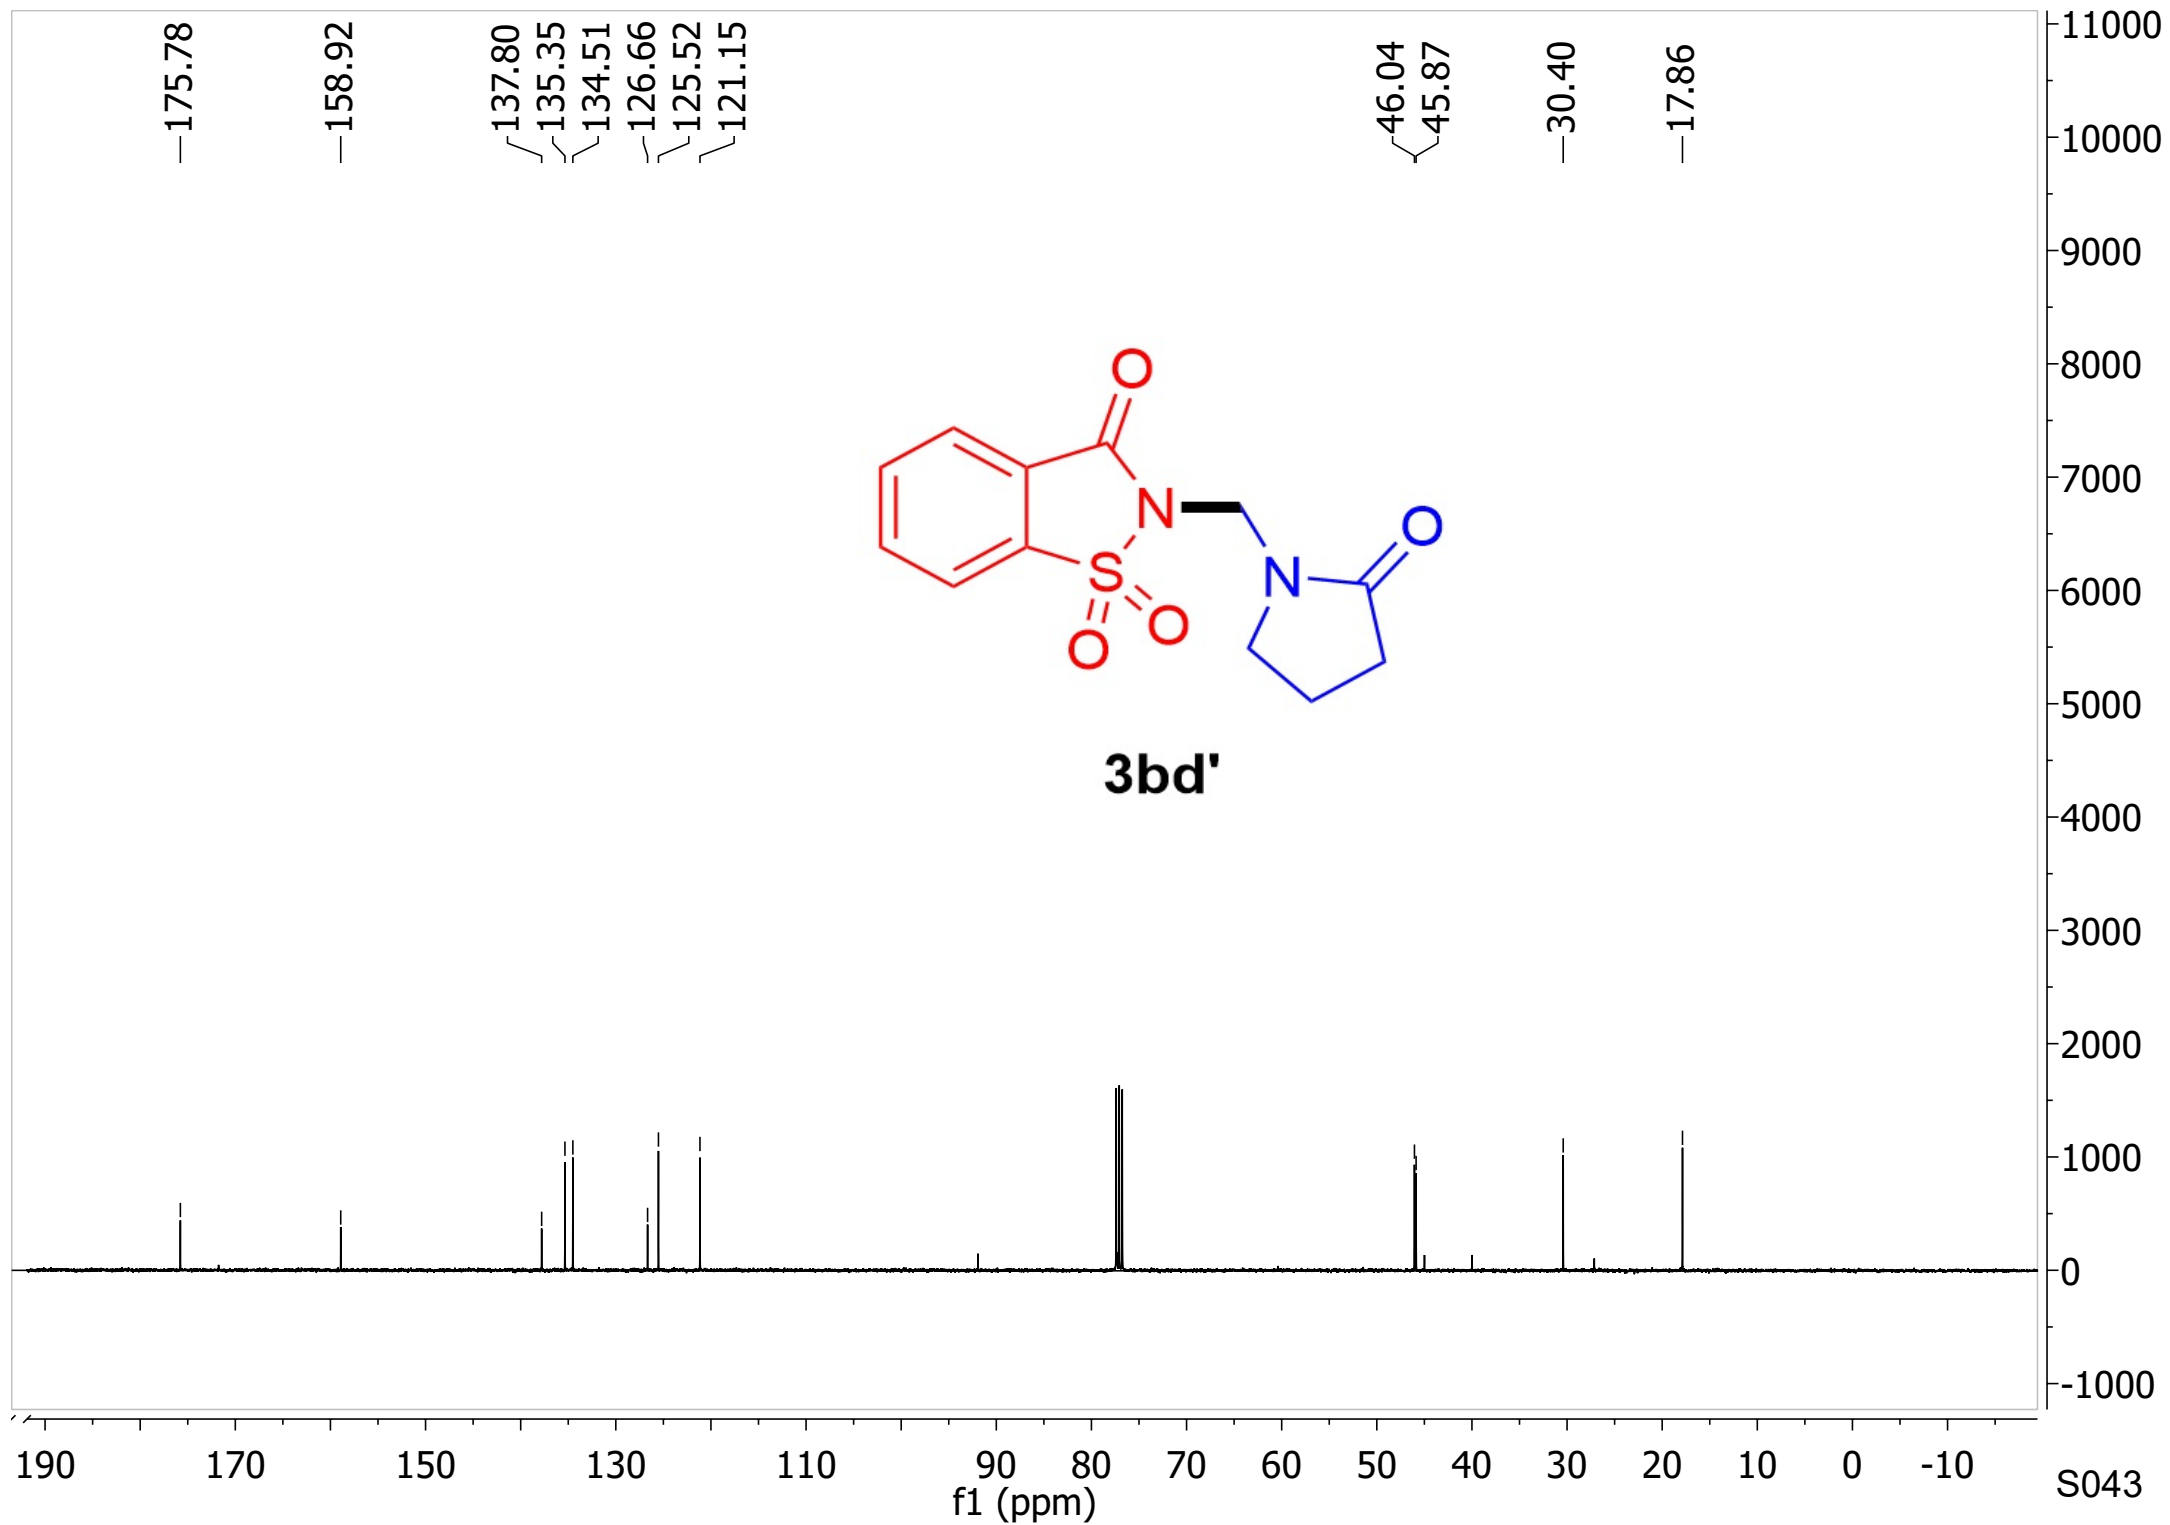



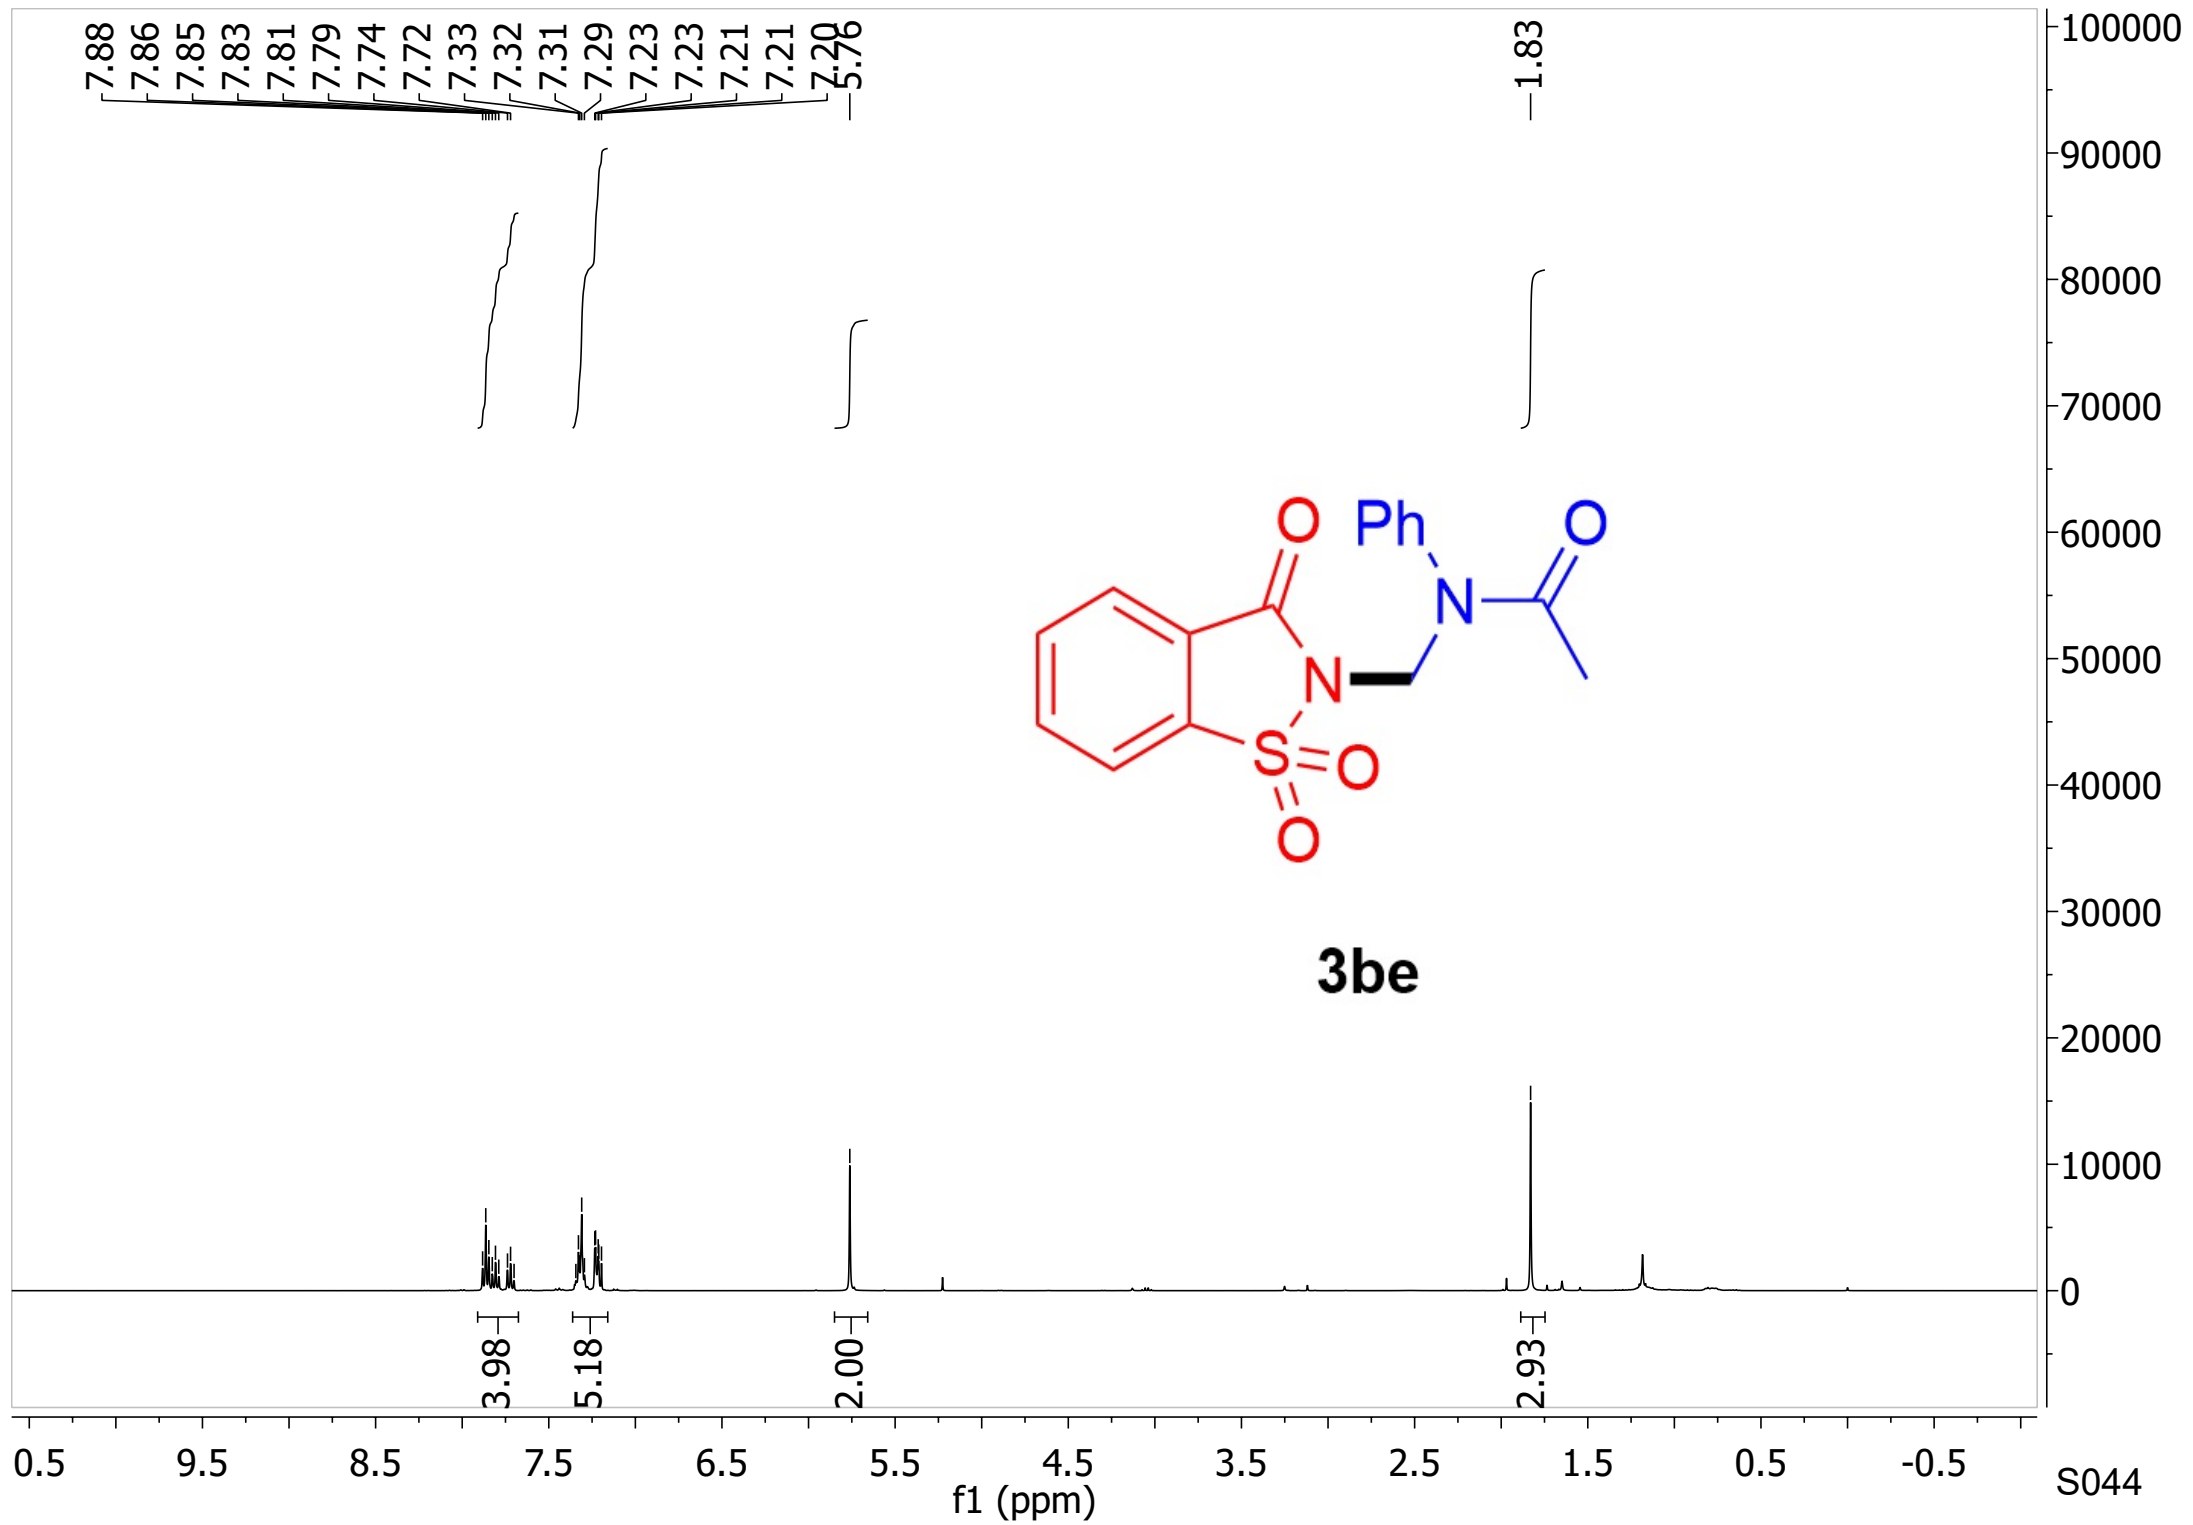

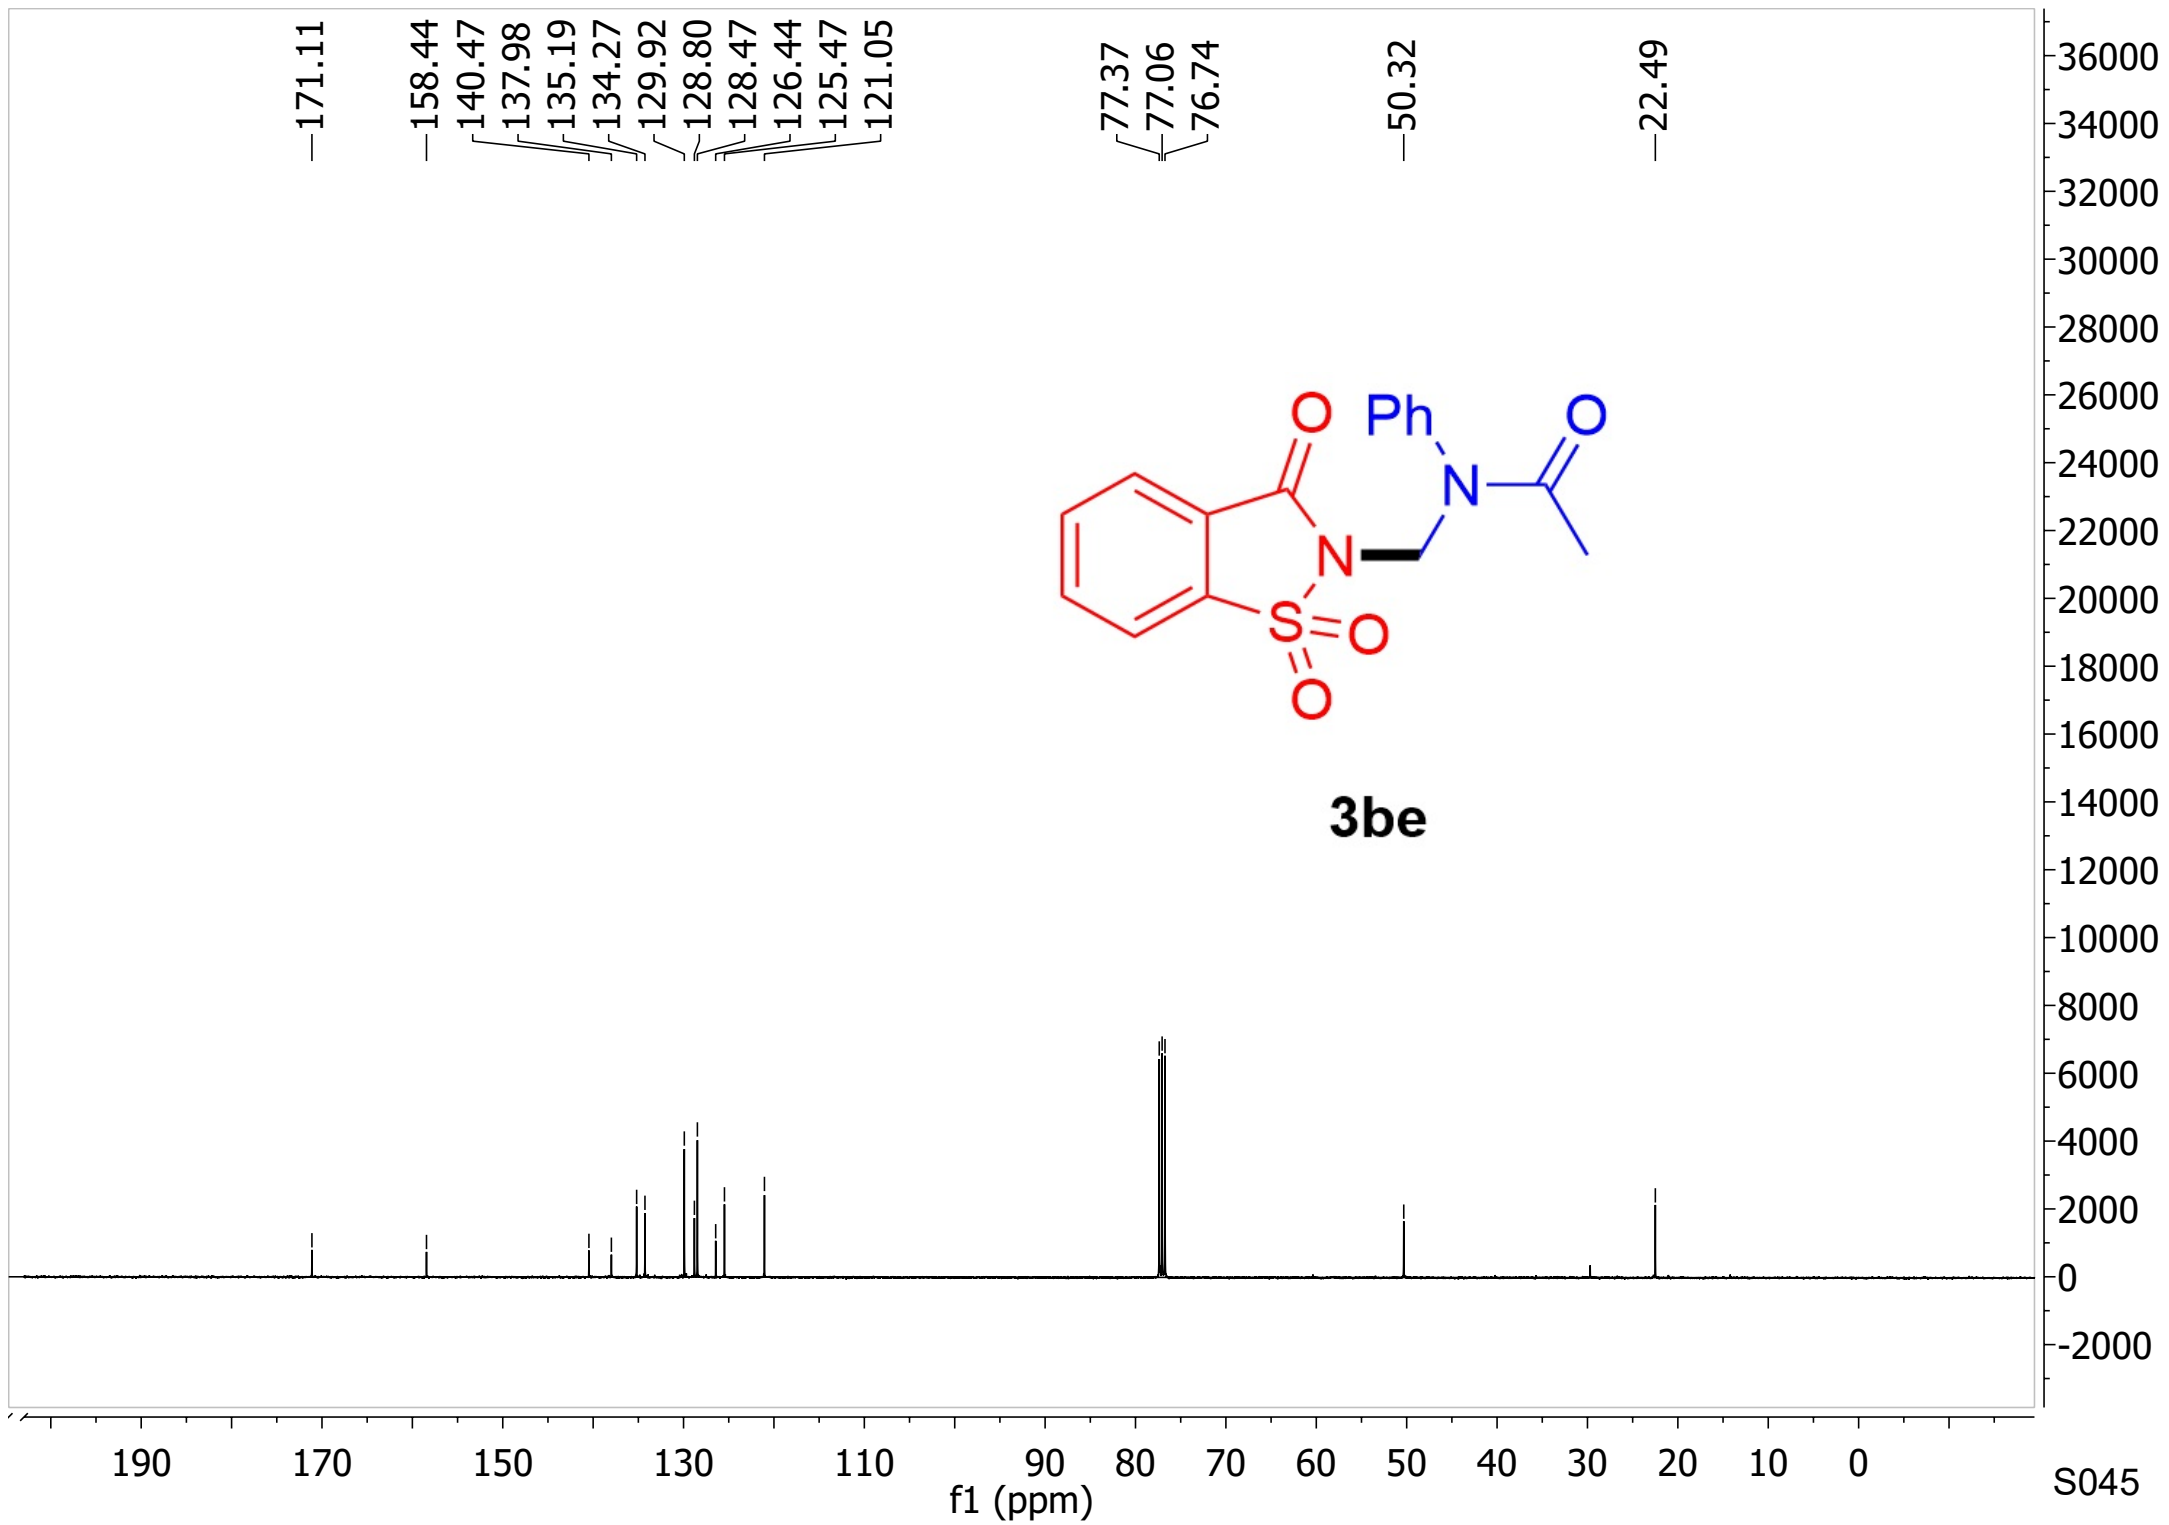

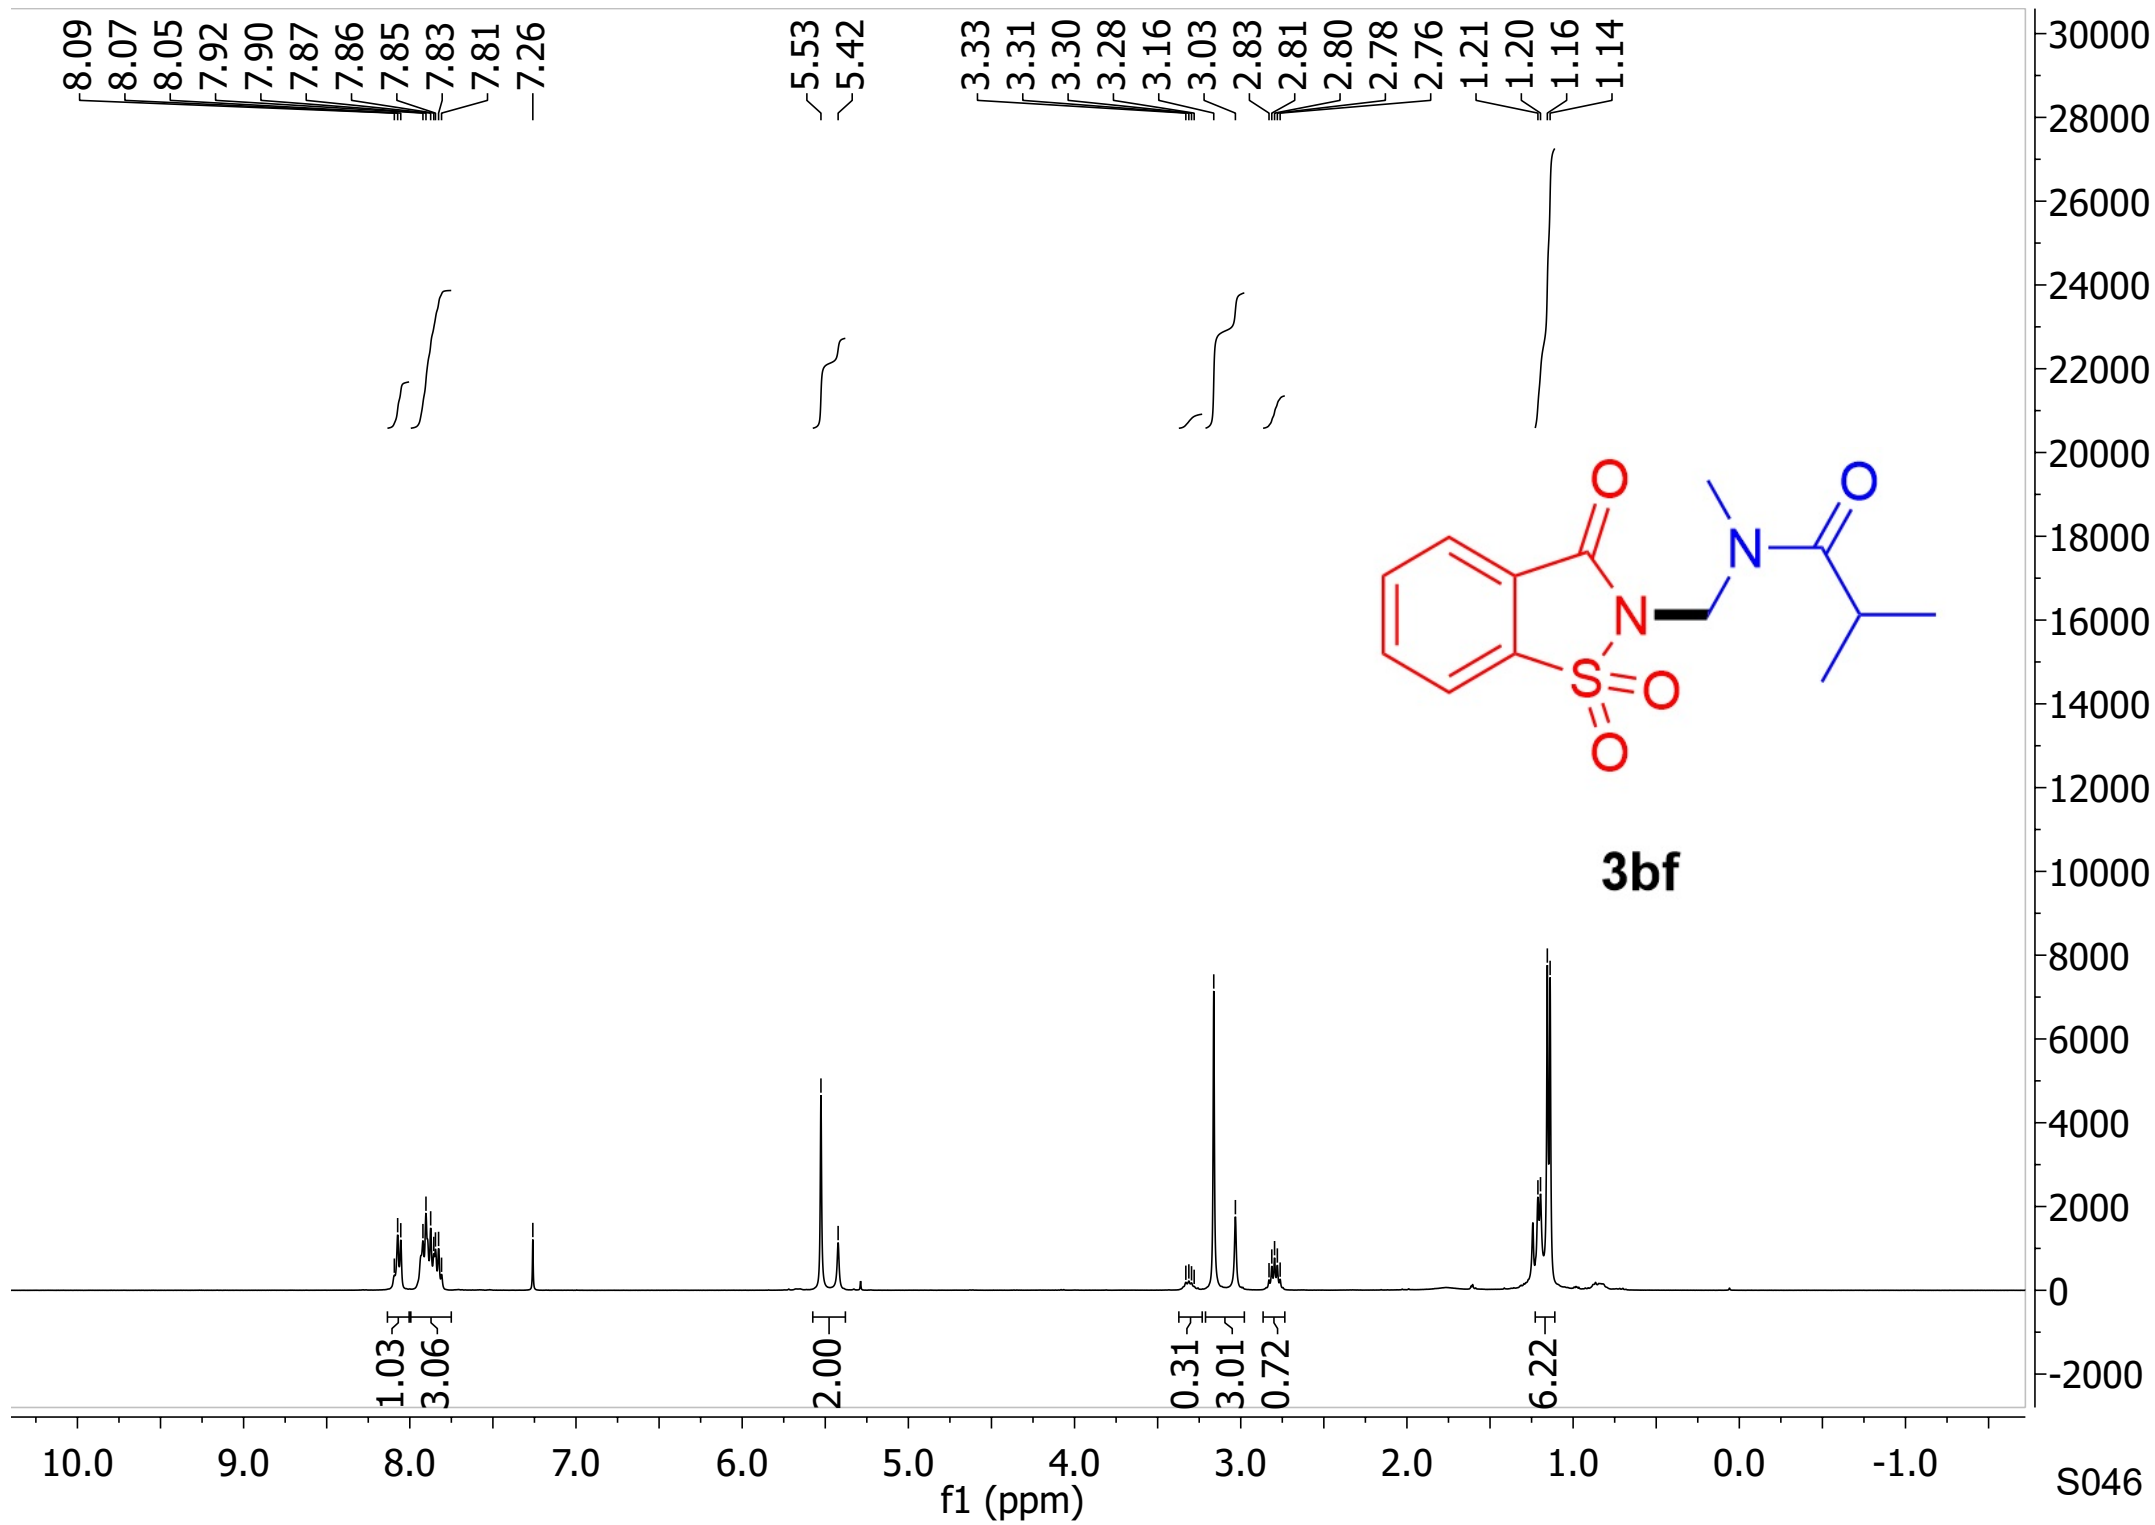

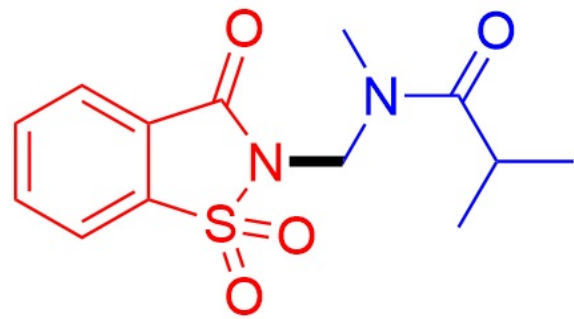

**3bf**

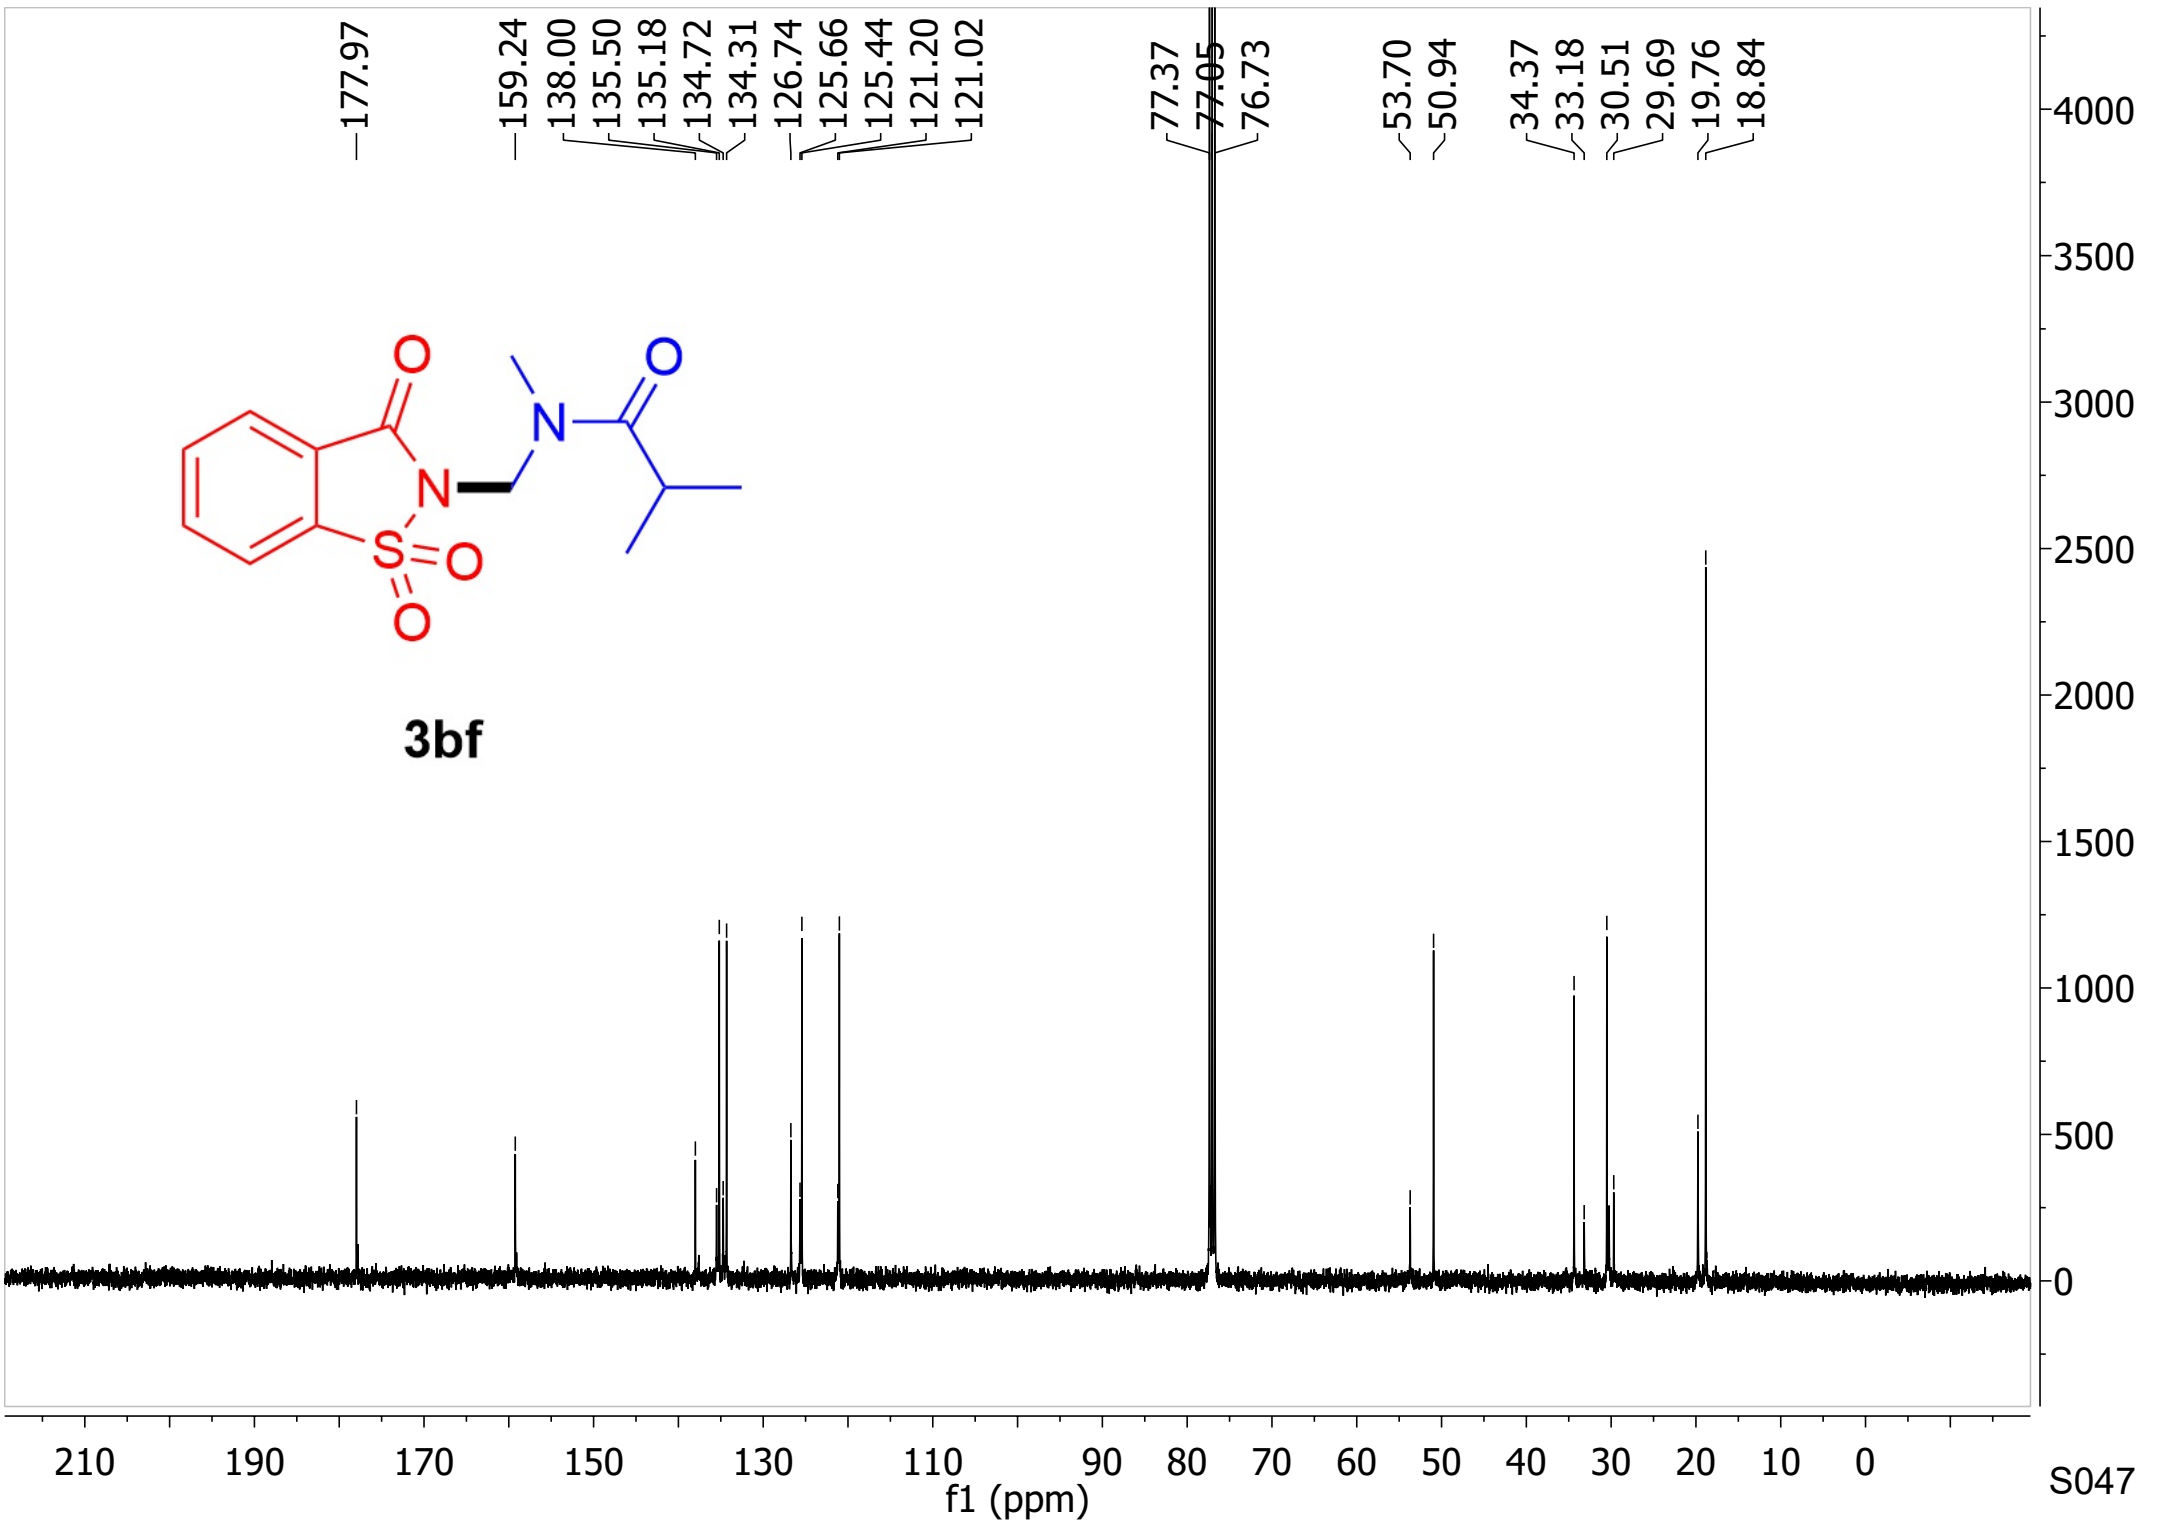

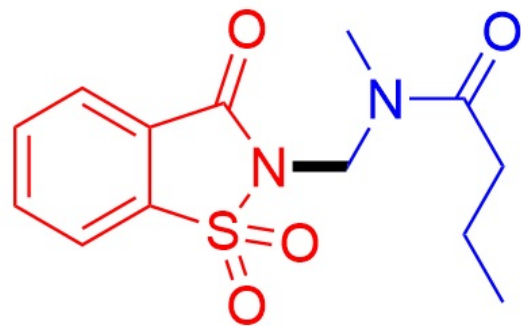

**3bg**

8.09  
8.06  
8.04  
7.95  
7.93  
7.92  
7.90  
7.89  
7.87  
7.85  
7.84  
7.84  
7.82  
7.81  
7.26  
5.51  
5.38

3.11  
3.03  
3.02  
2.65  
2.33  
2.31  
2.29  
1.74  
1.72  
1.70  
1.68  
1.66  
0.99  
0.97  
0.95  
0.94

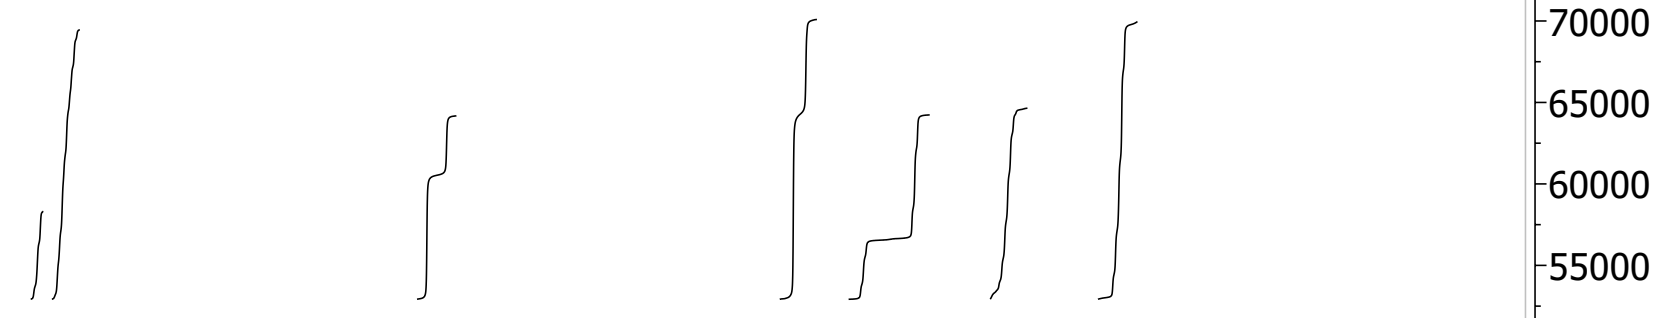

0.96  
2.94  
2.00  
3.05  
2.01  
2.08  
3.03

10.5 9.0 8.0 7.0 6.0 5.0 4.0 3.0 2.0 1.0 0.0 -1.0

f1 (ppm)

S048

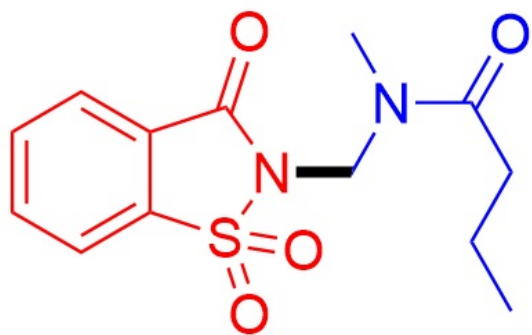

**3bg**

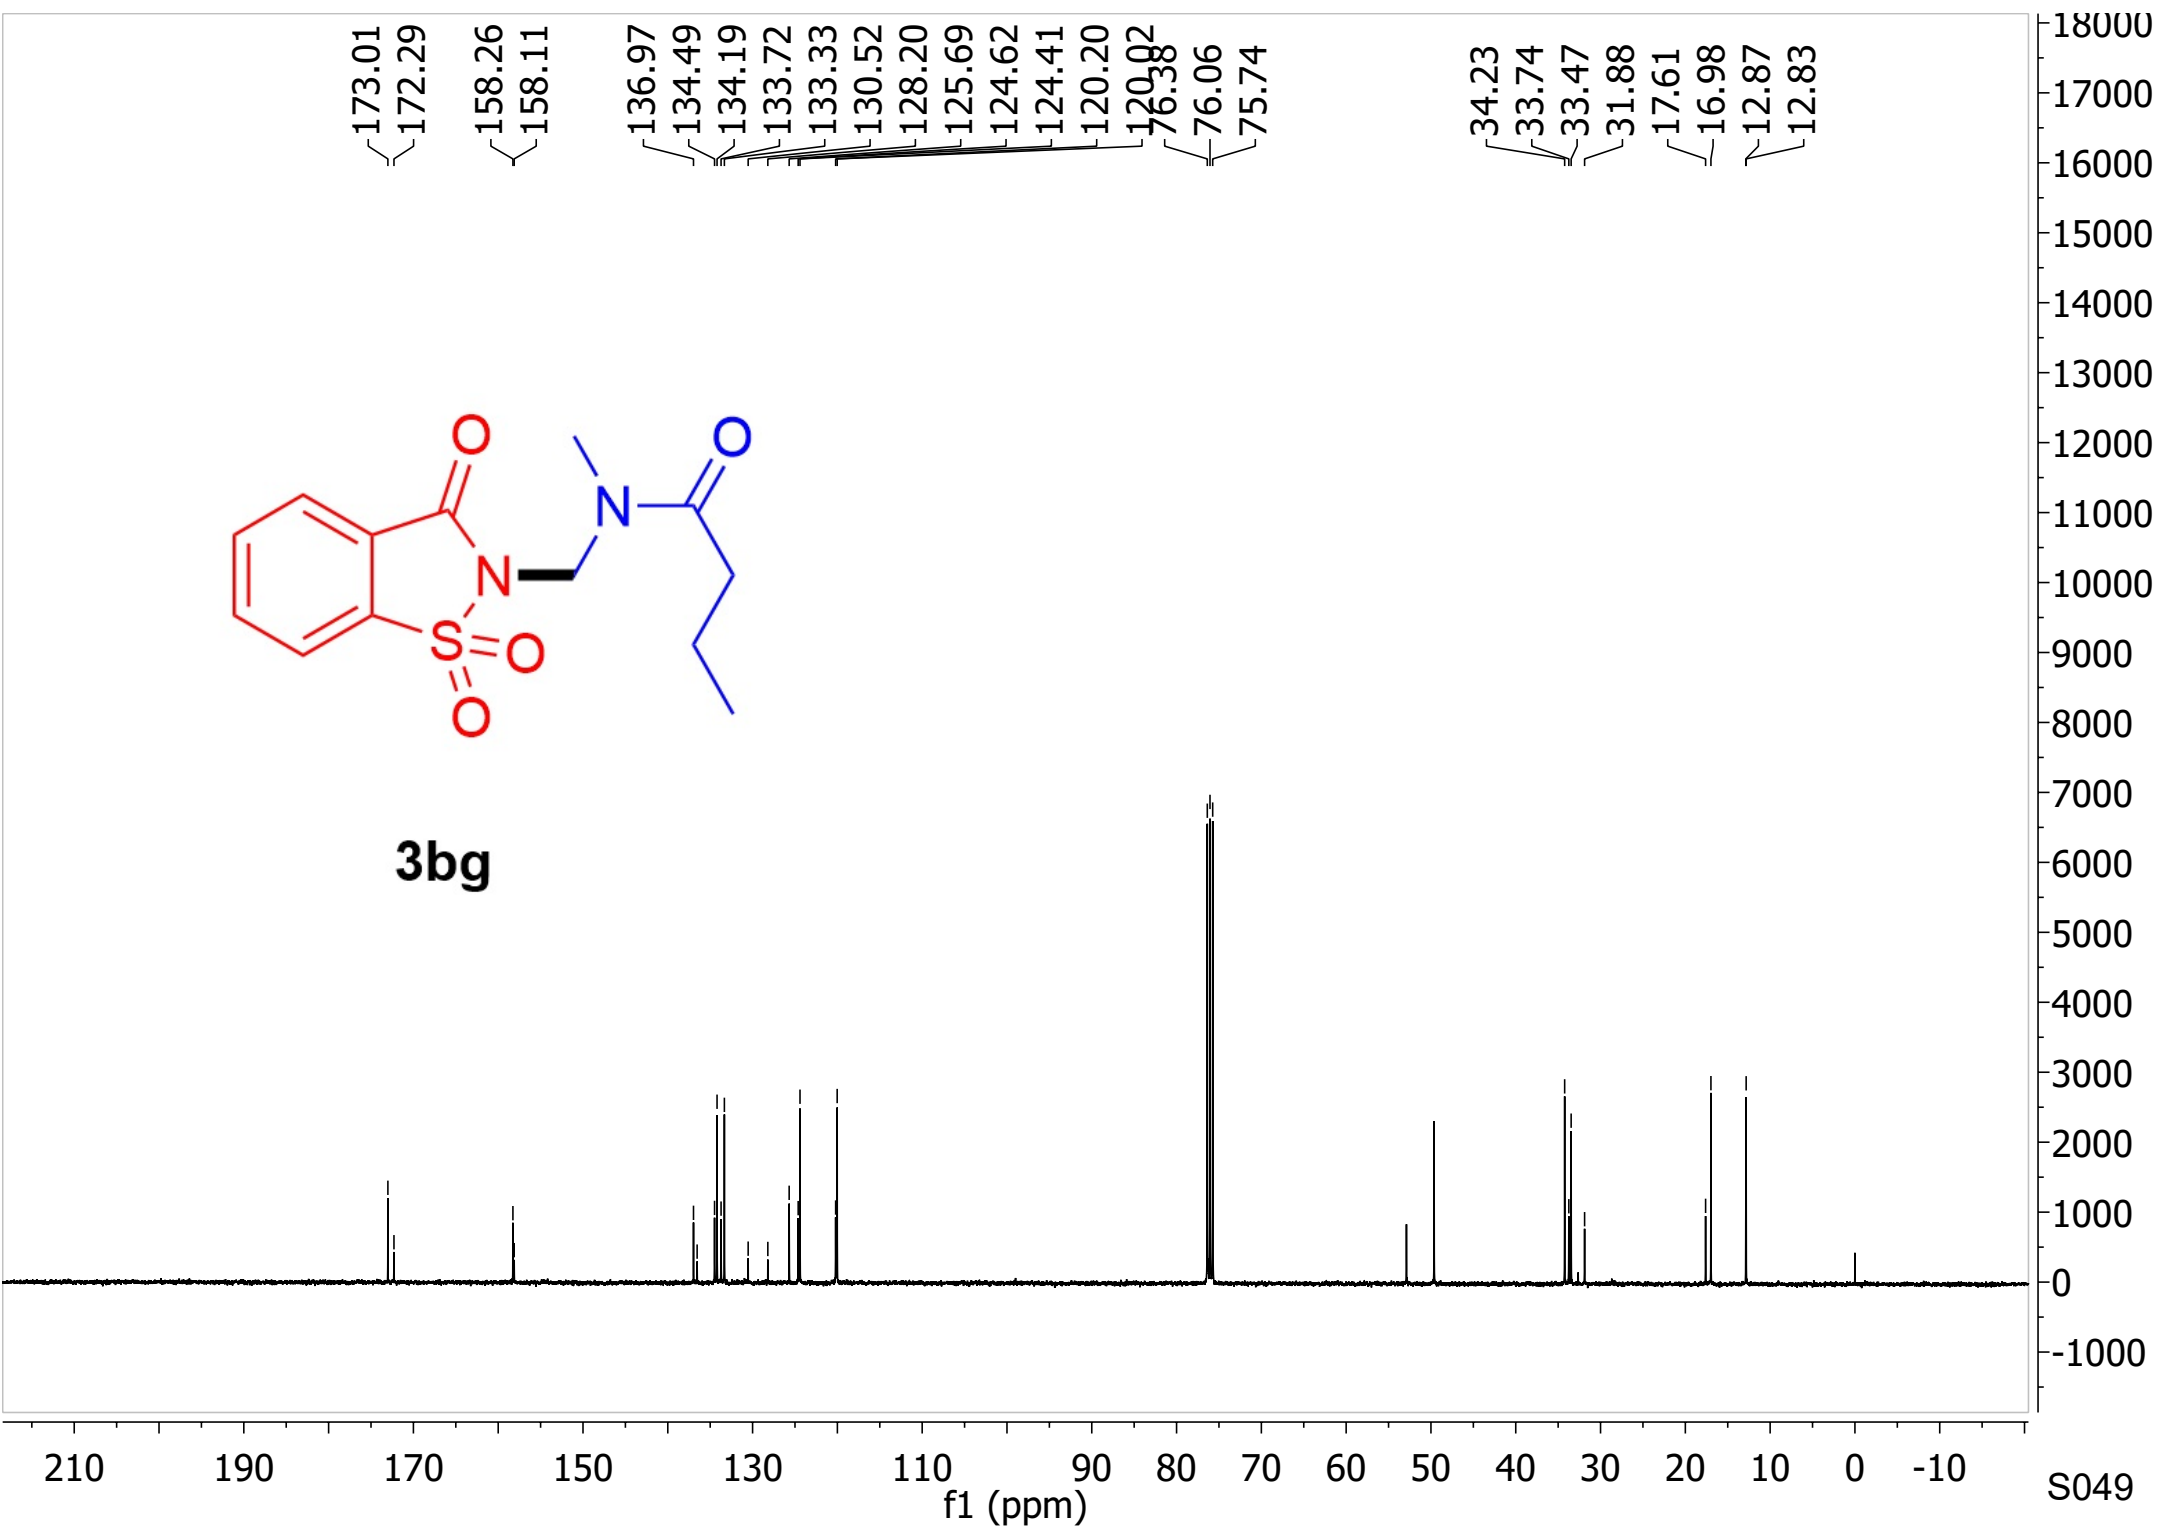

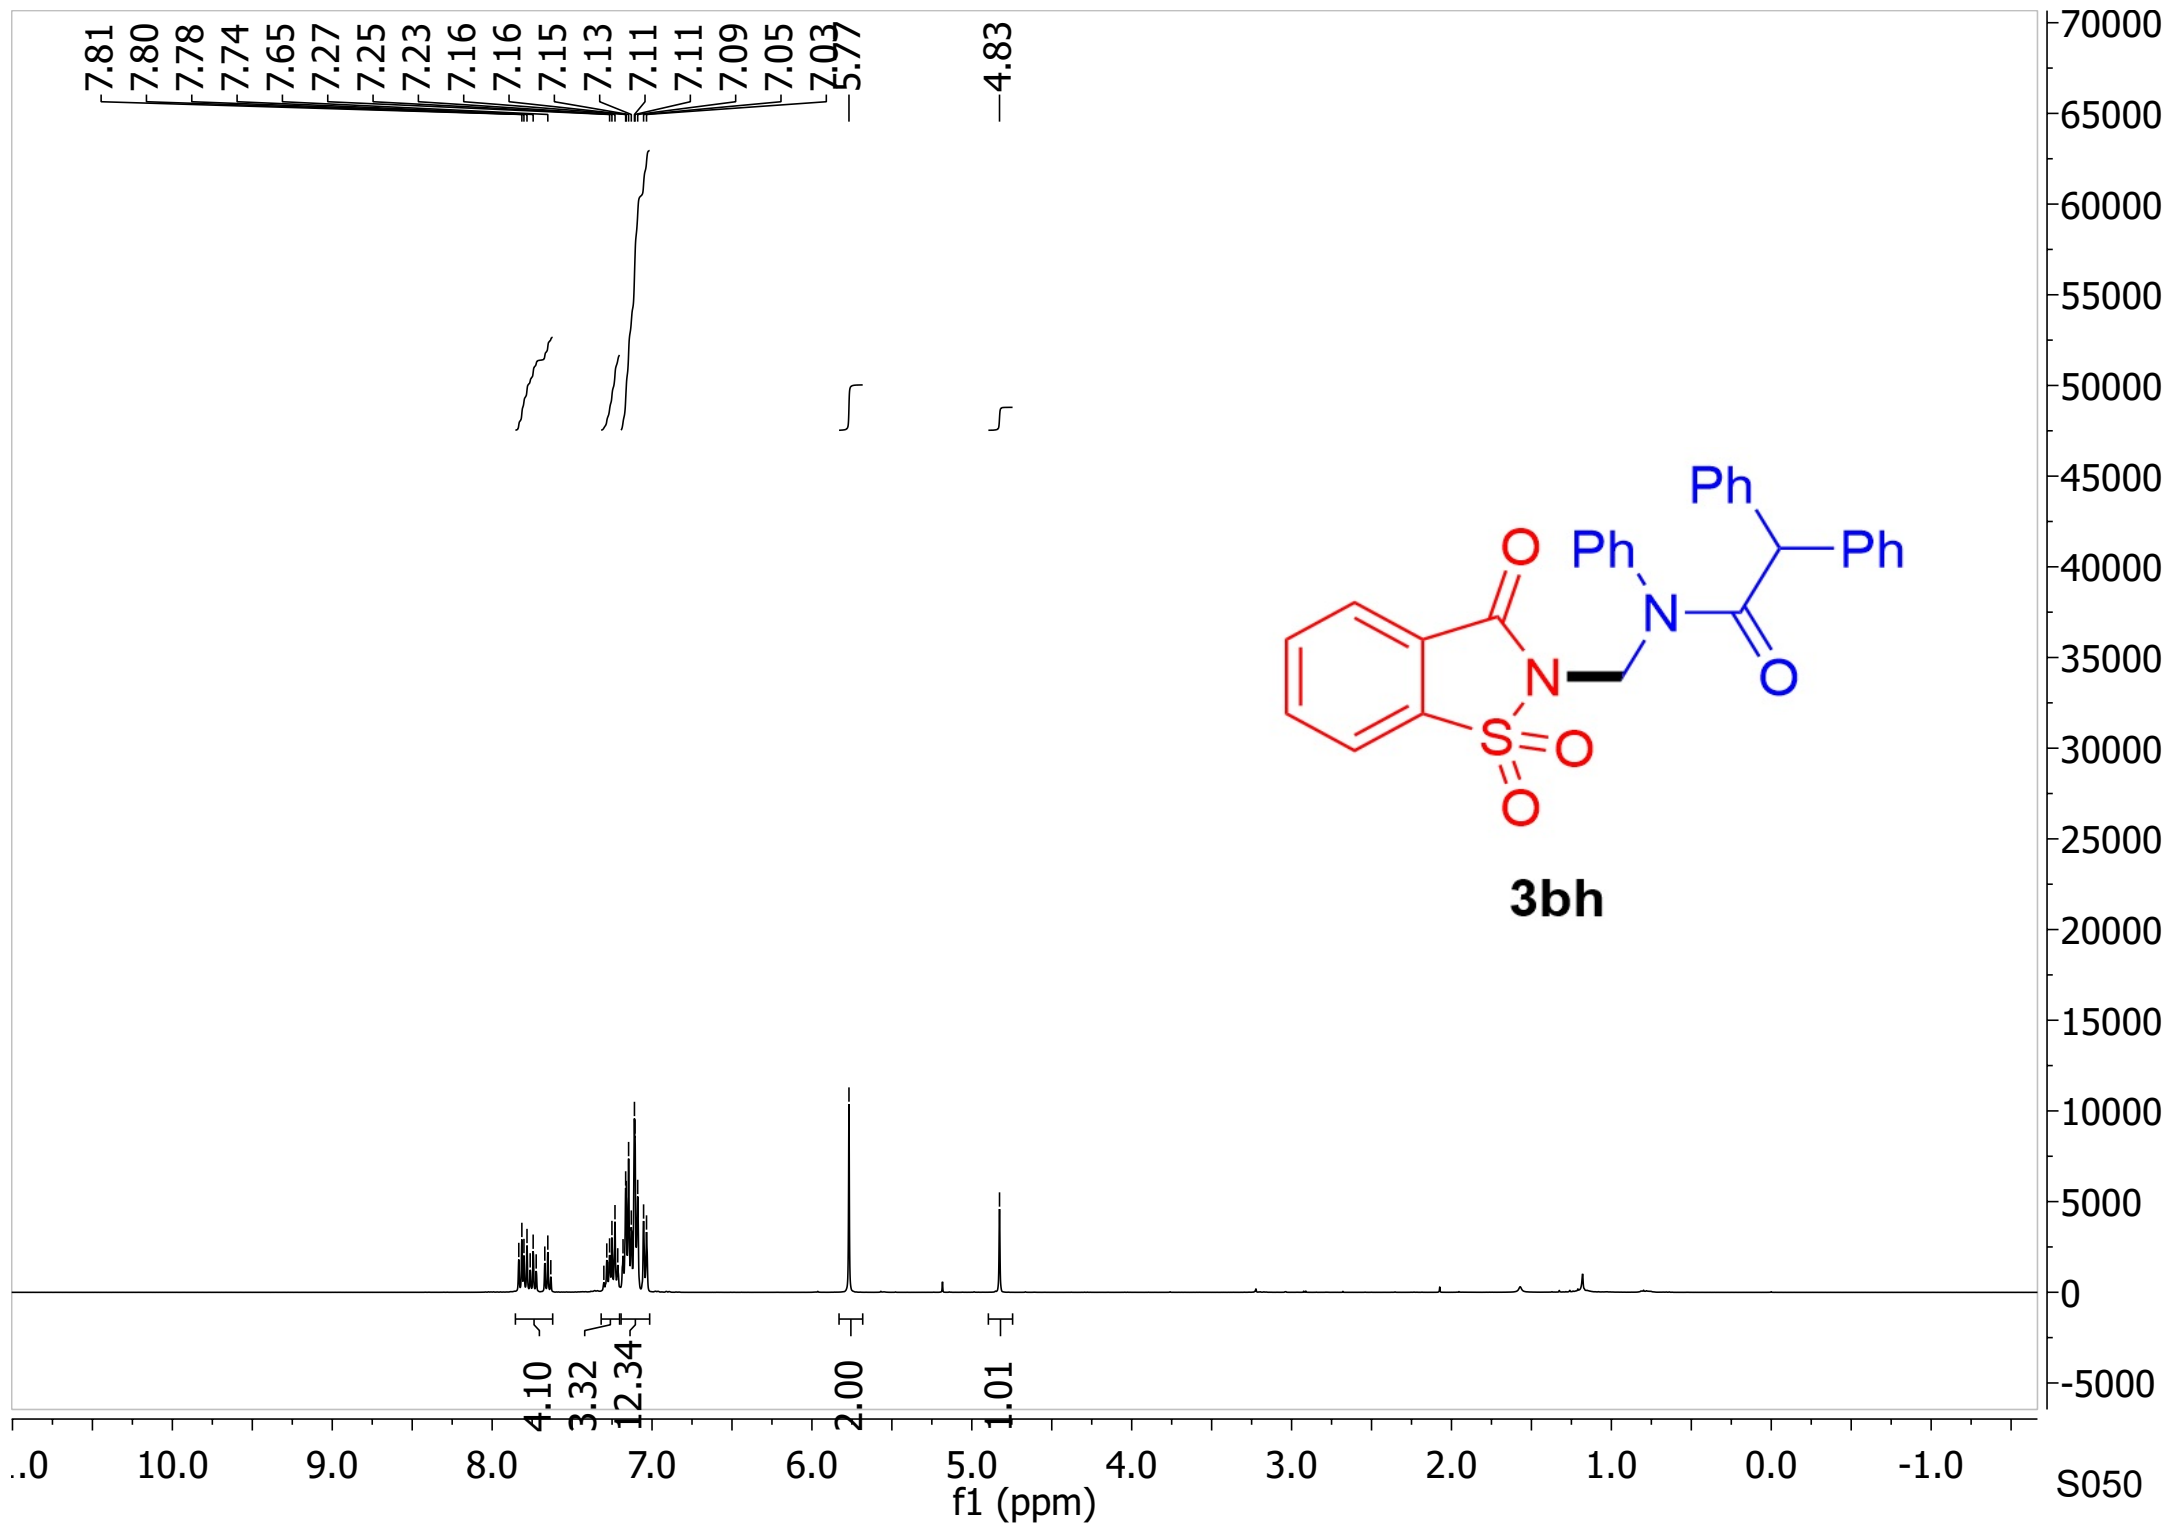

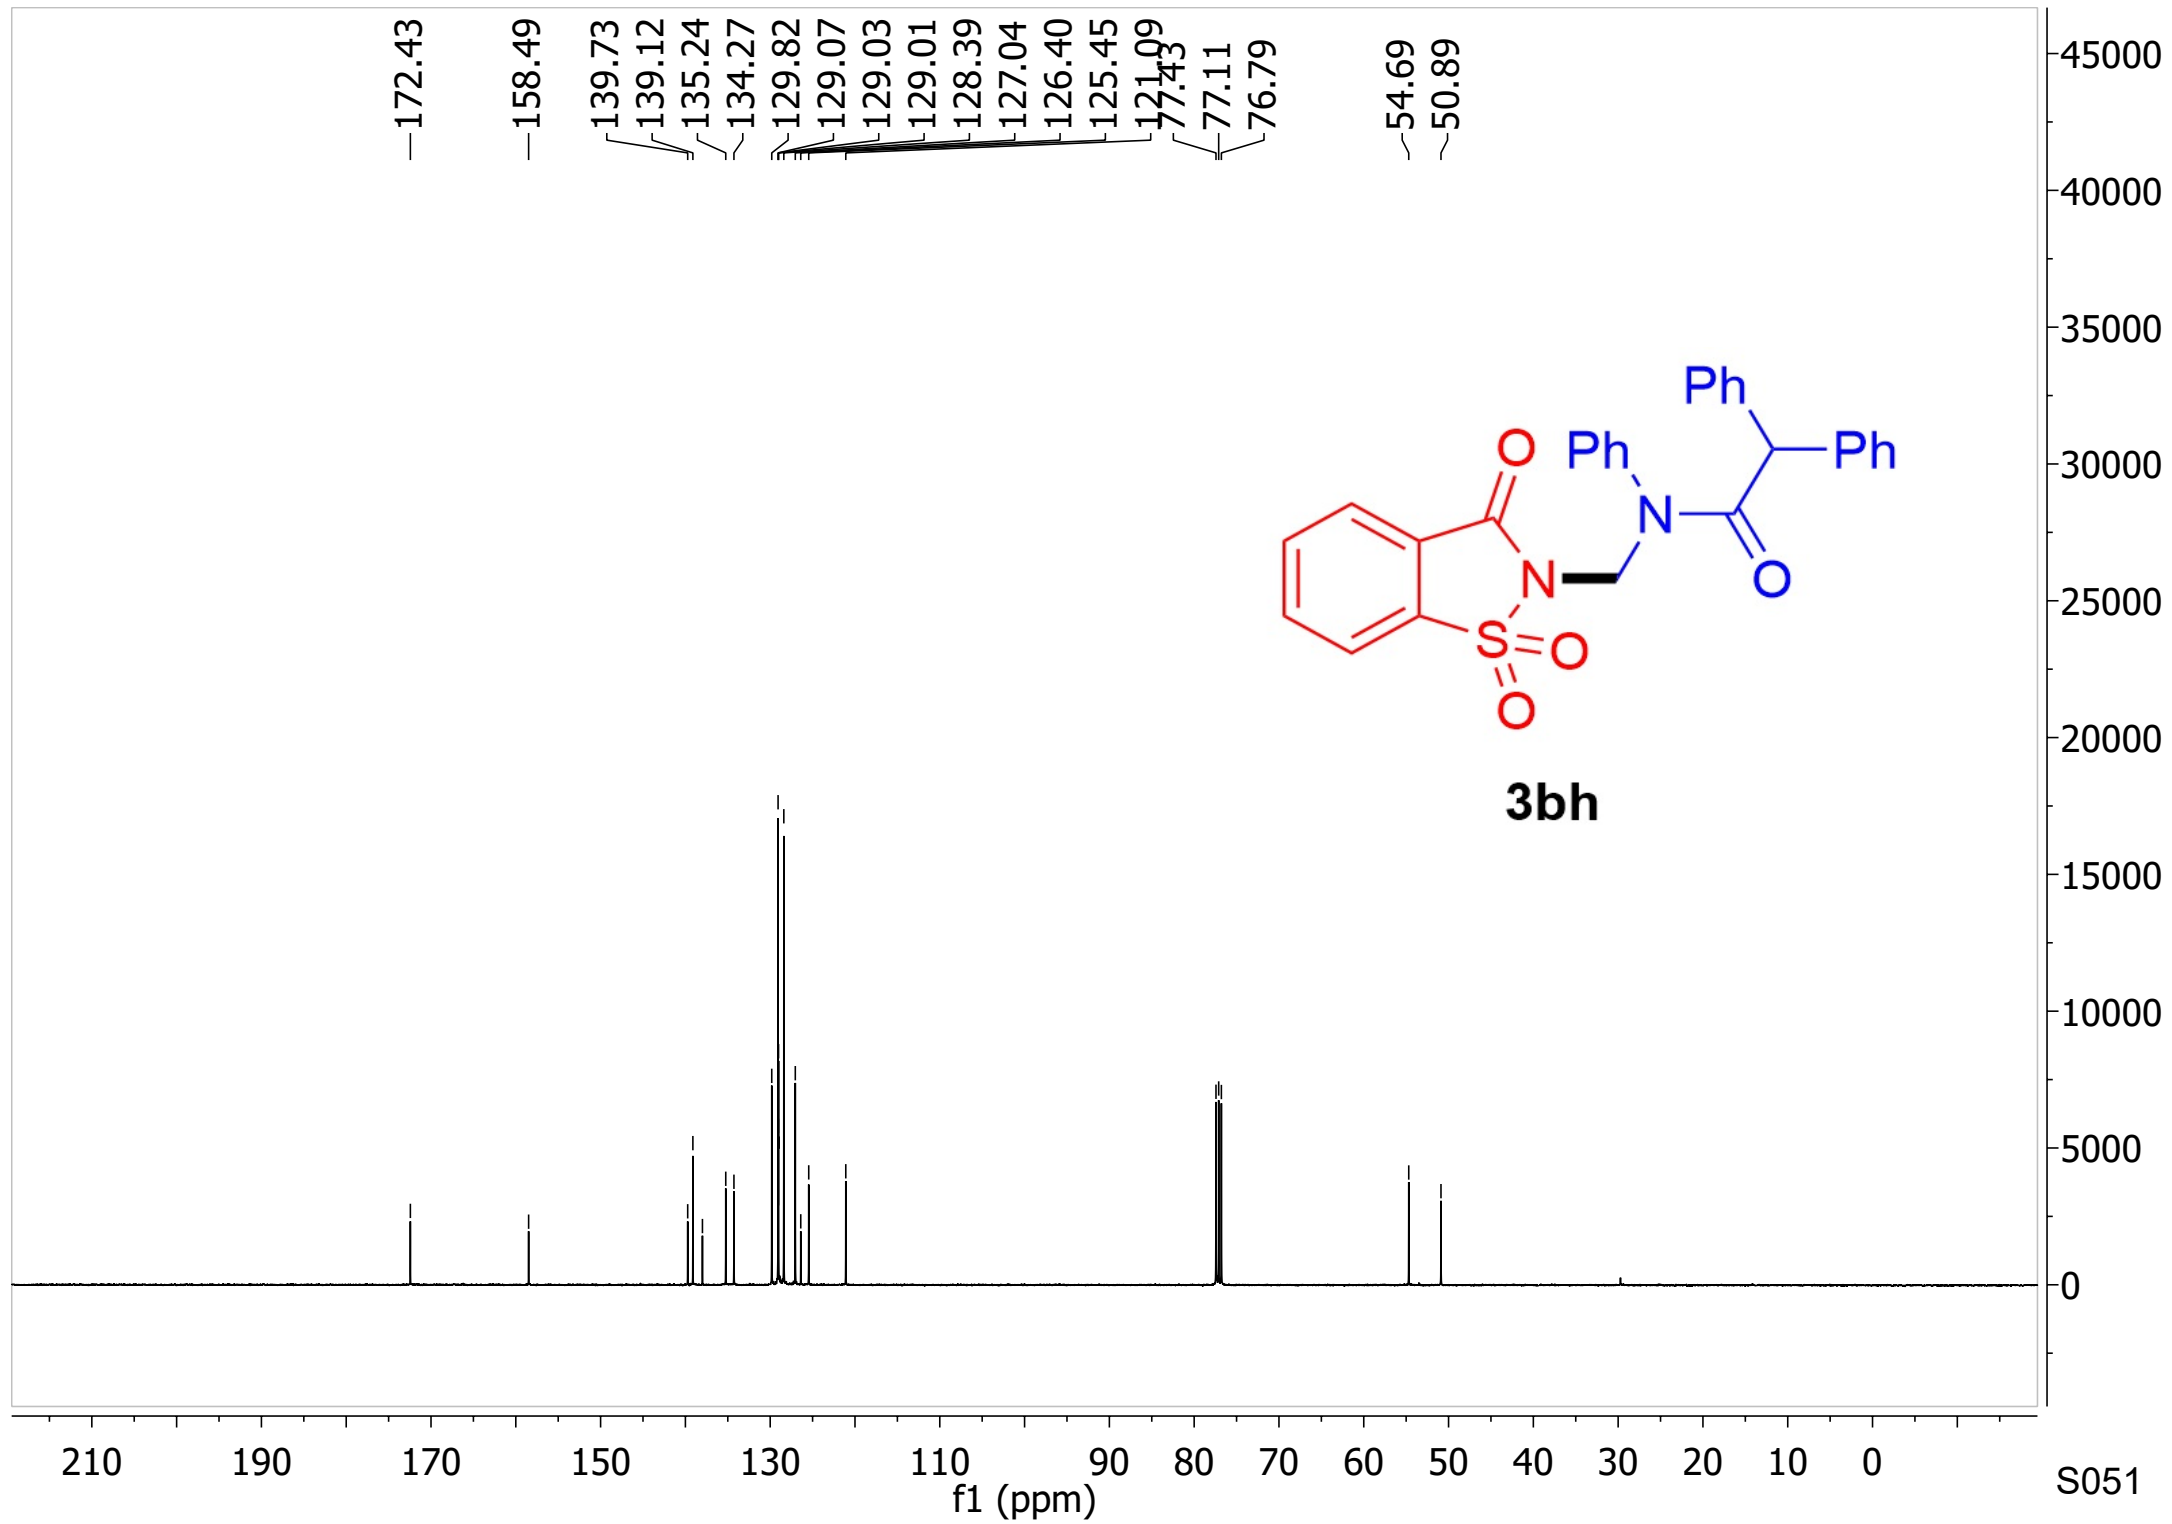



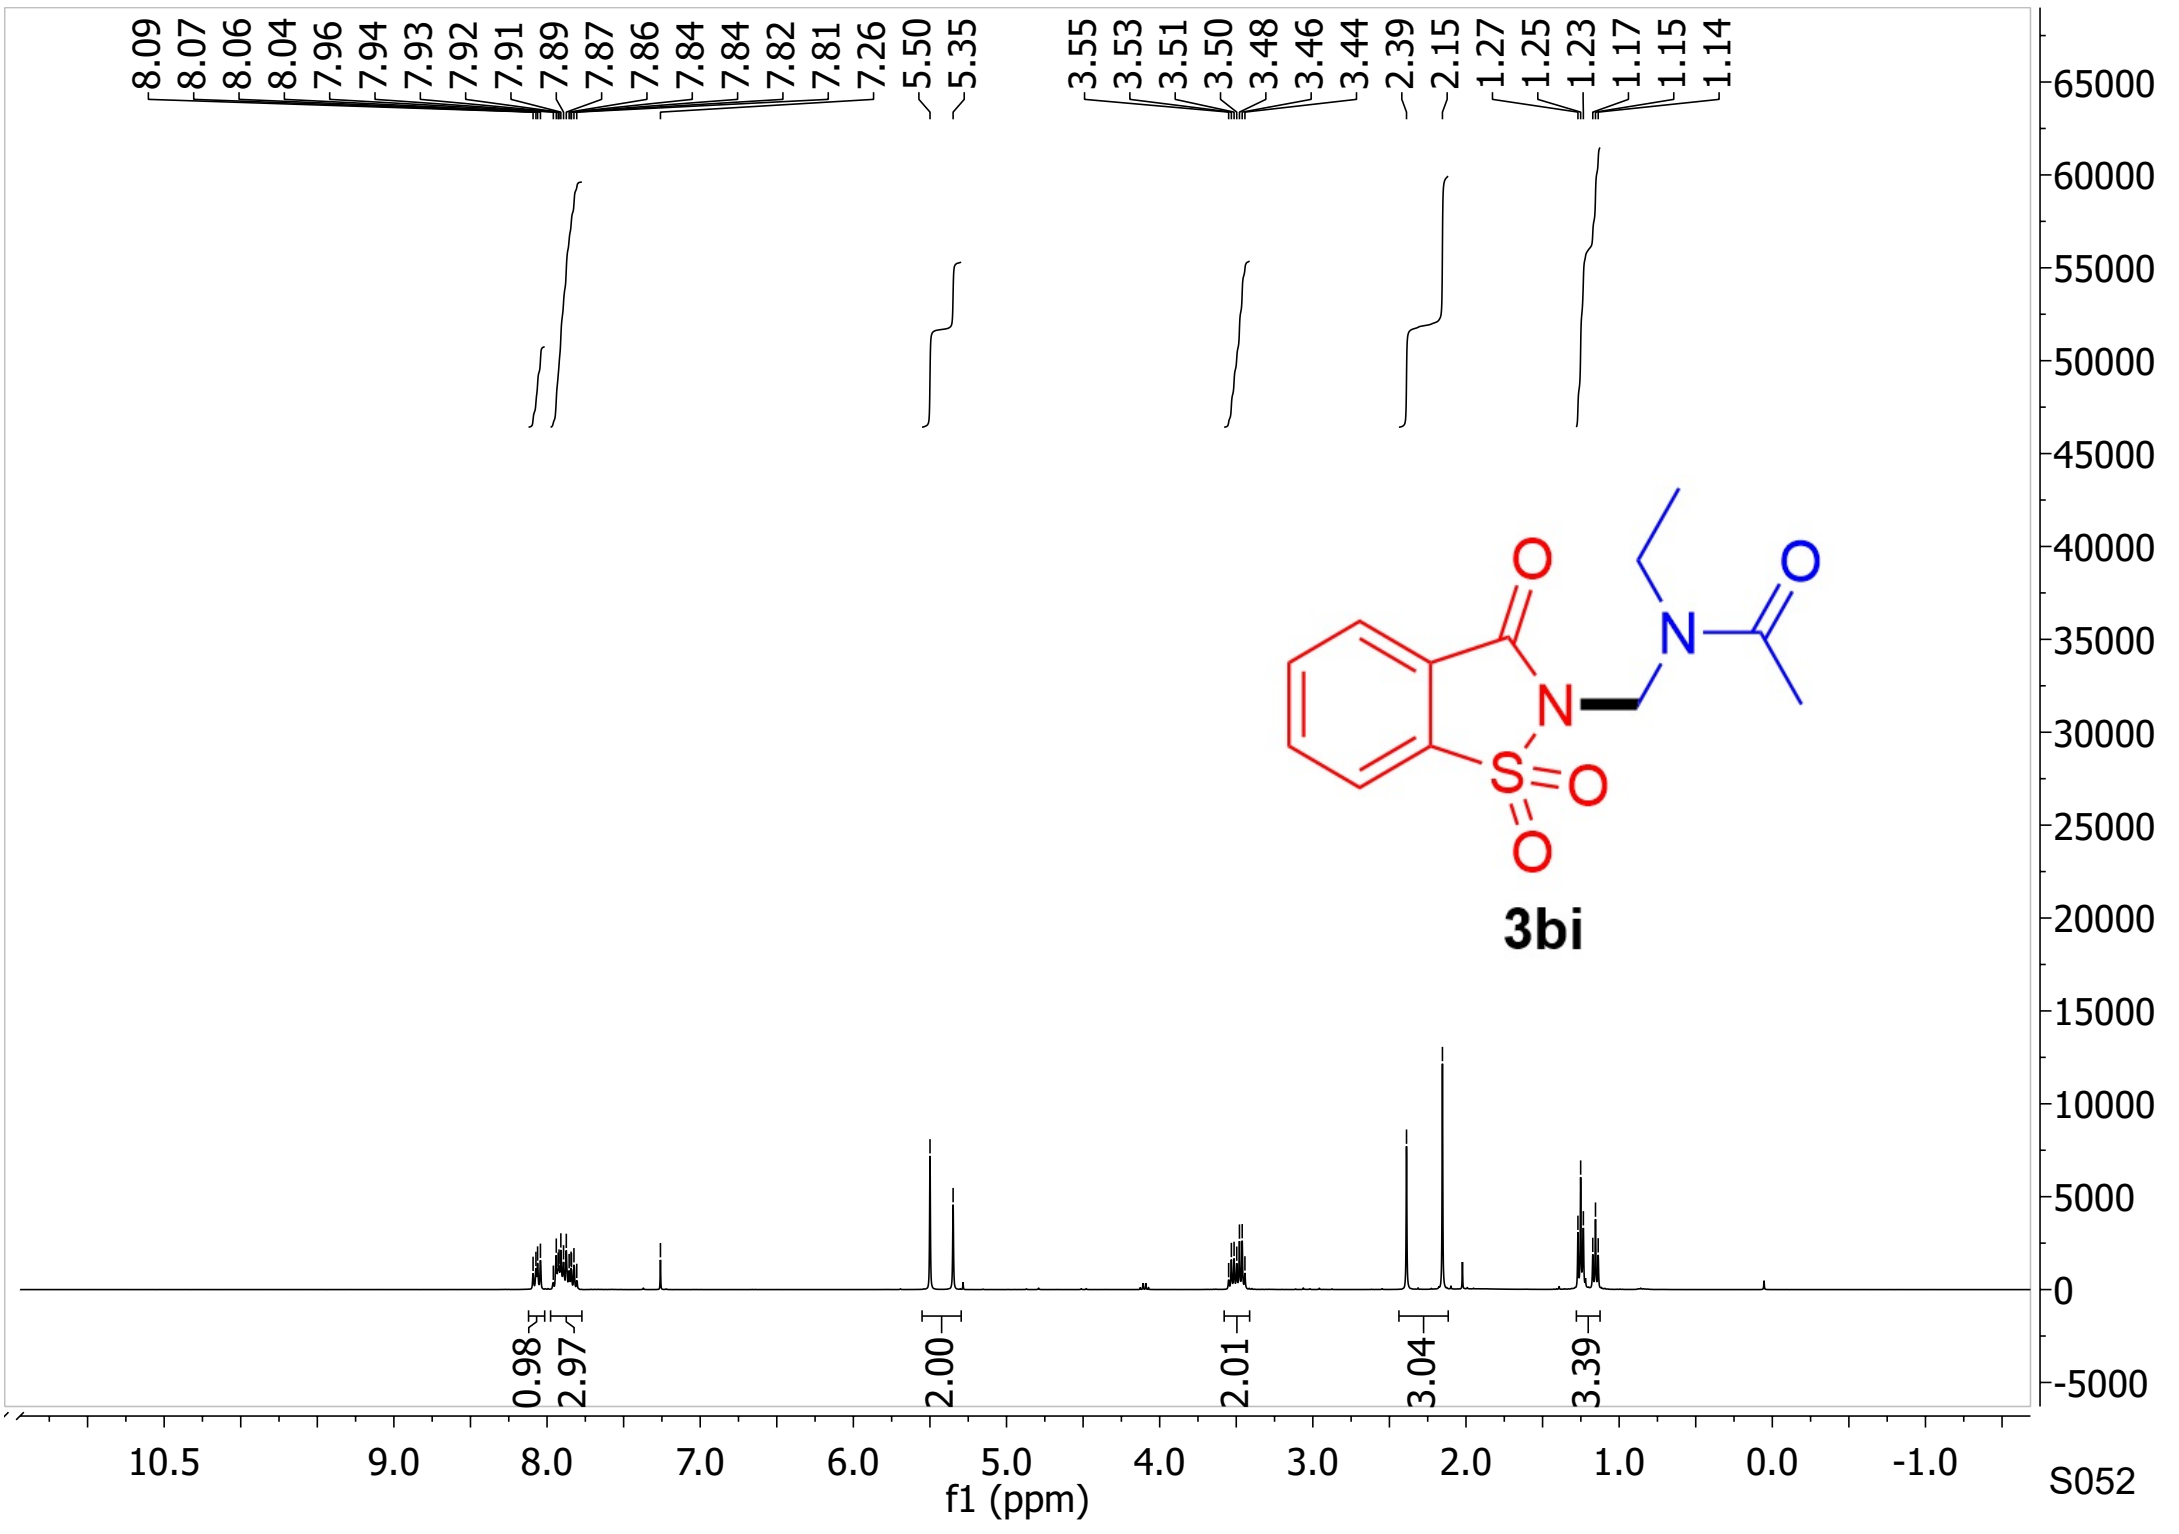

171.27  
170.32  
159.50  
159.22  
138.09  
137.57  
135.52  
135.25  
134.75  
134.33  
126.64  
126.57  
125.65  
125.39  
121.25  
121.10

77.38  
77.07  
76.75

52.57  
47.95  
42.18  
39.73

21.86  
21.21  
14.00  
12.60

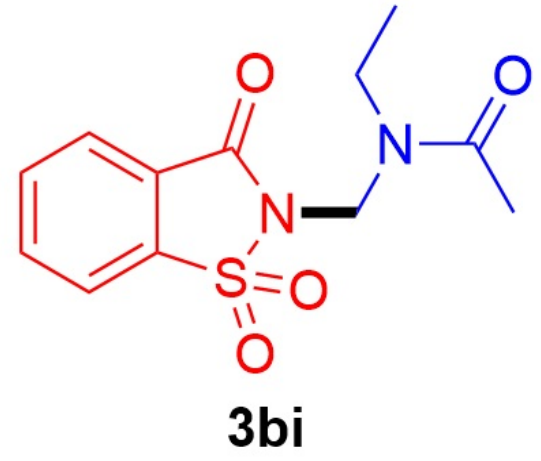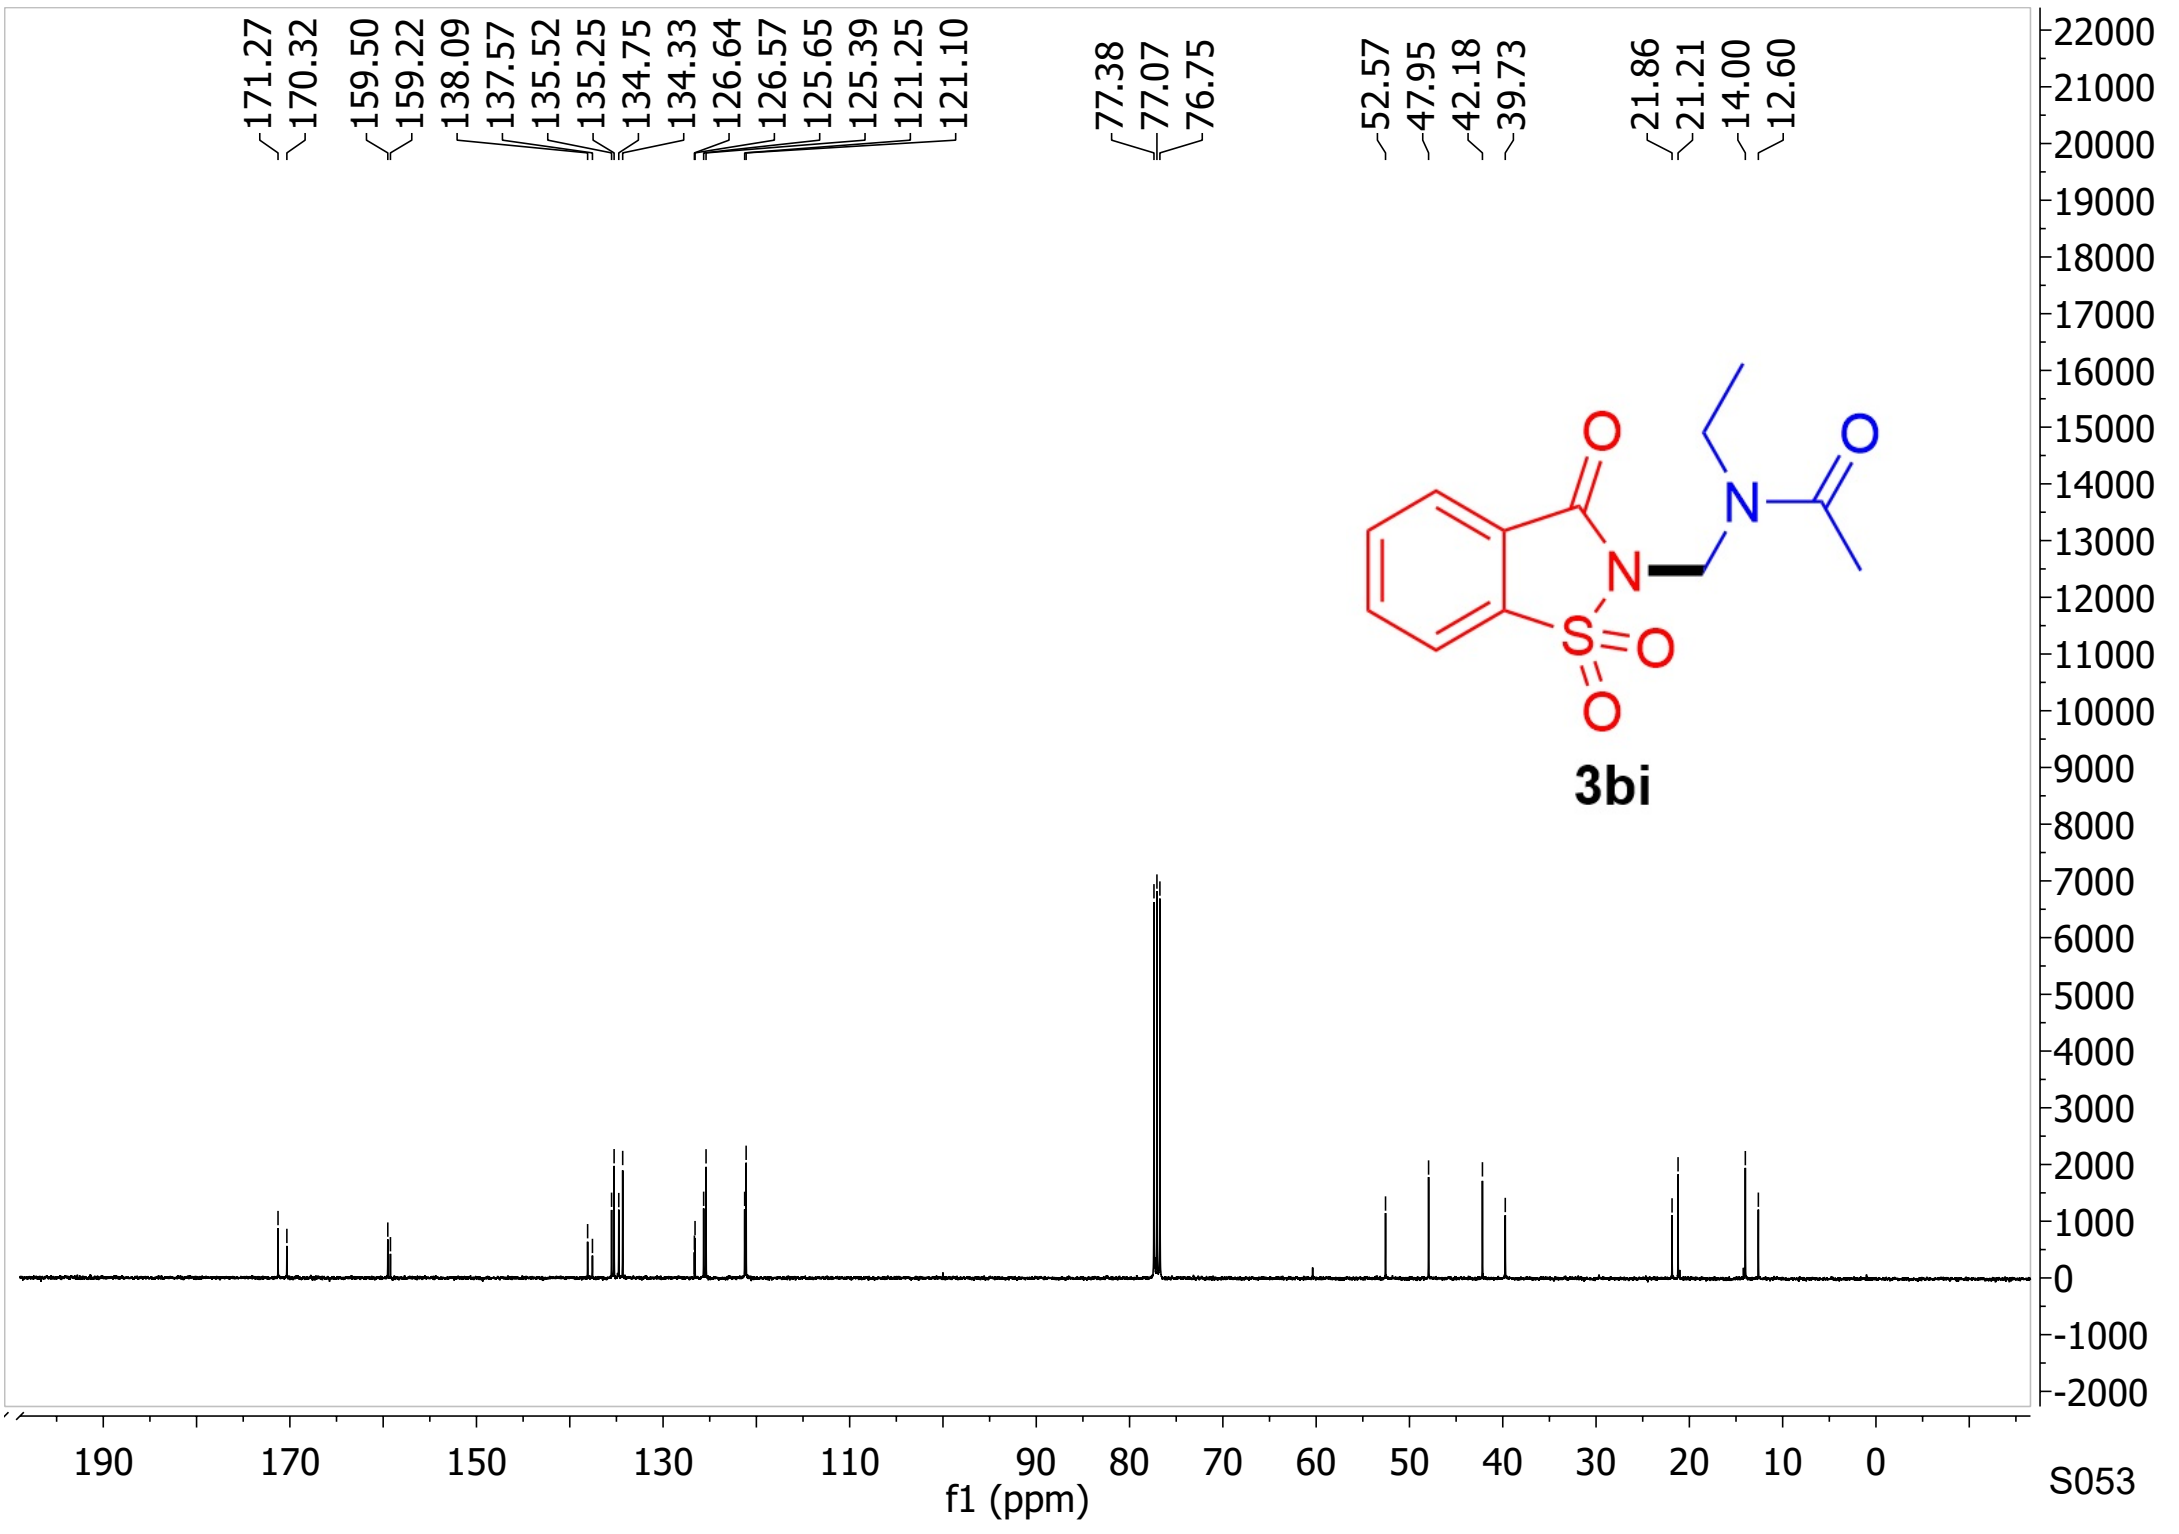

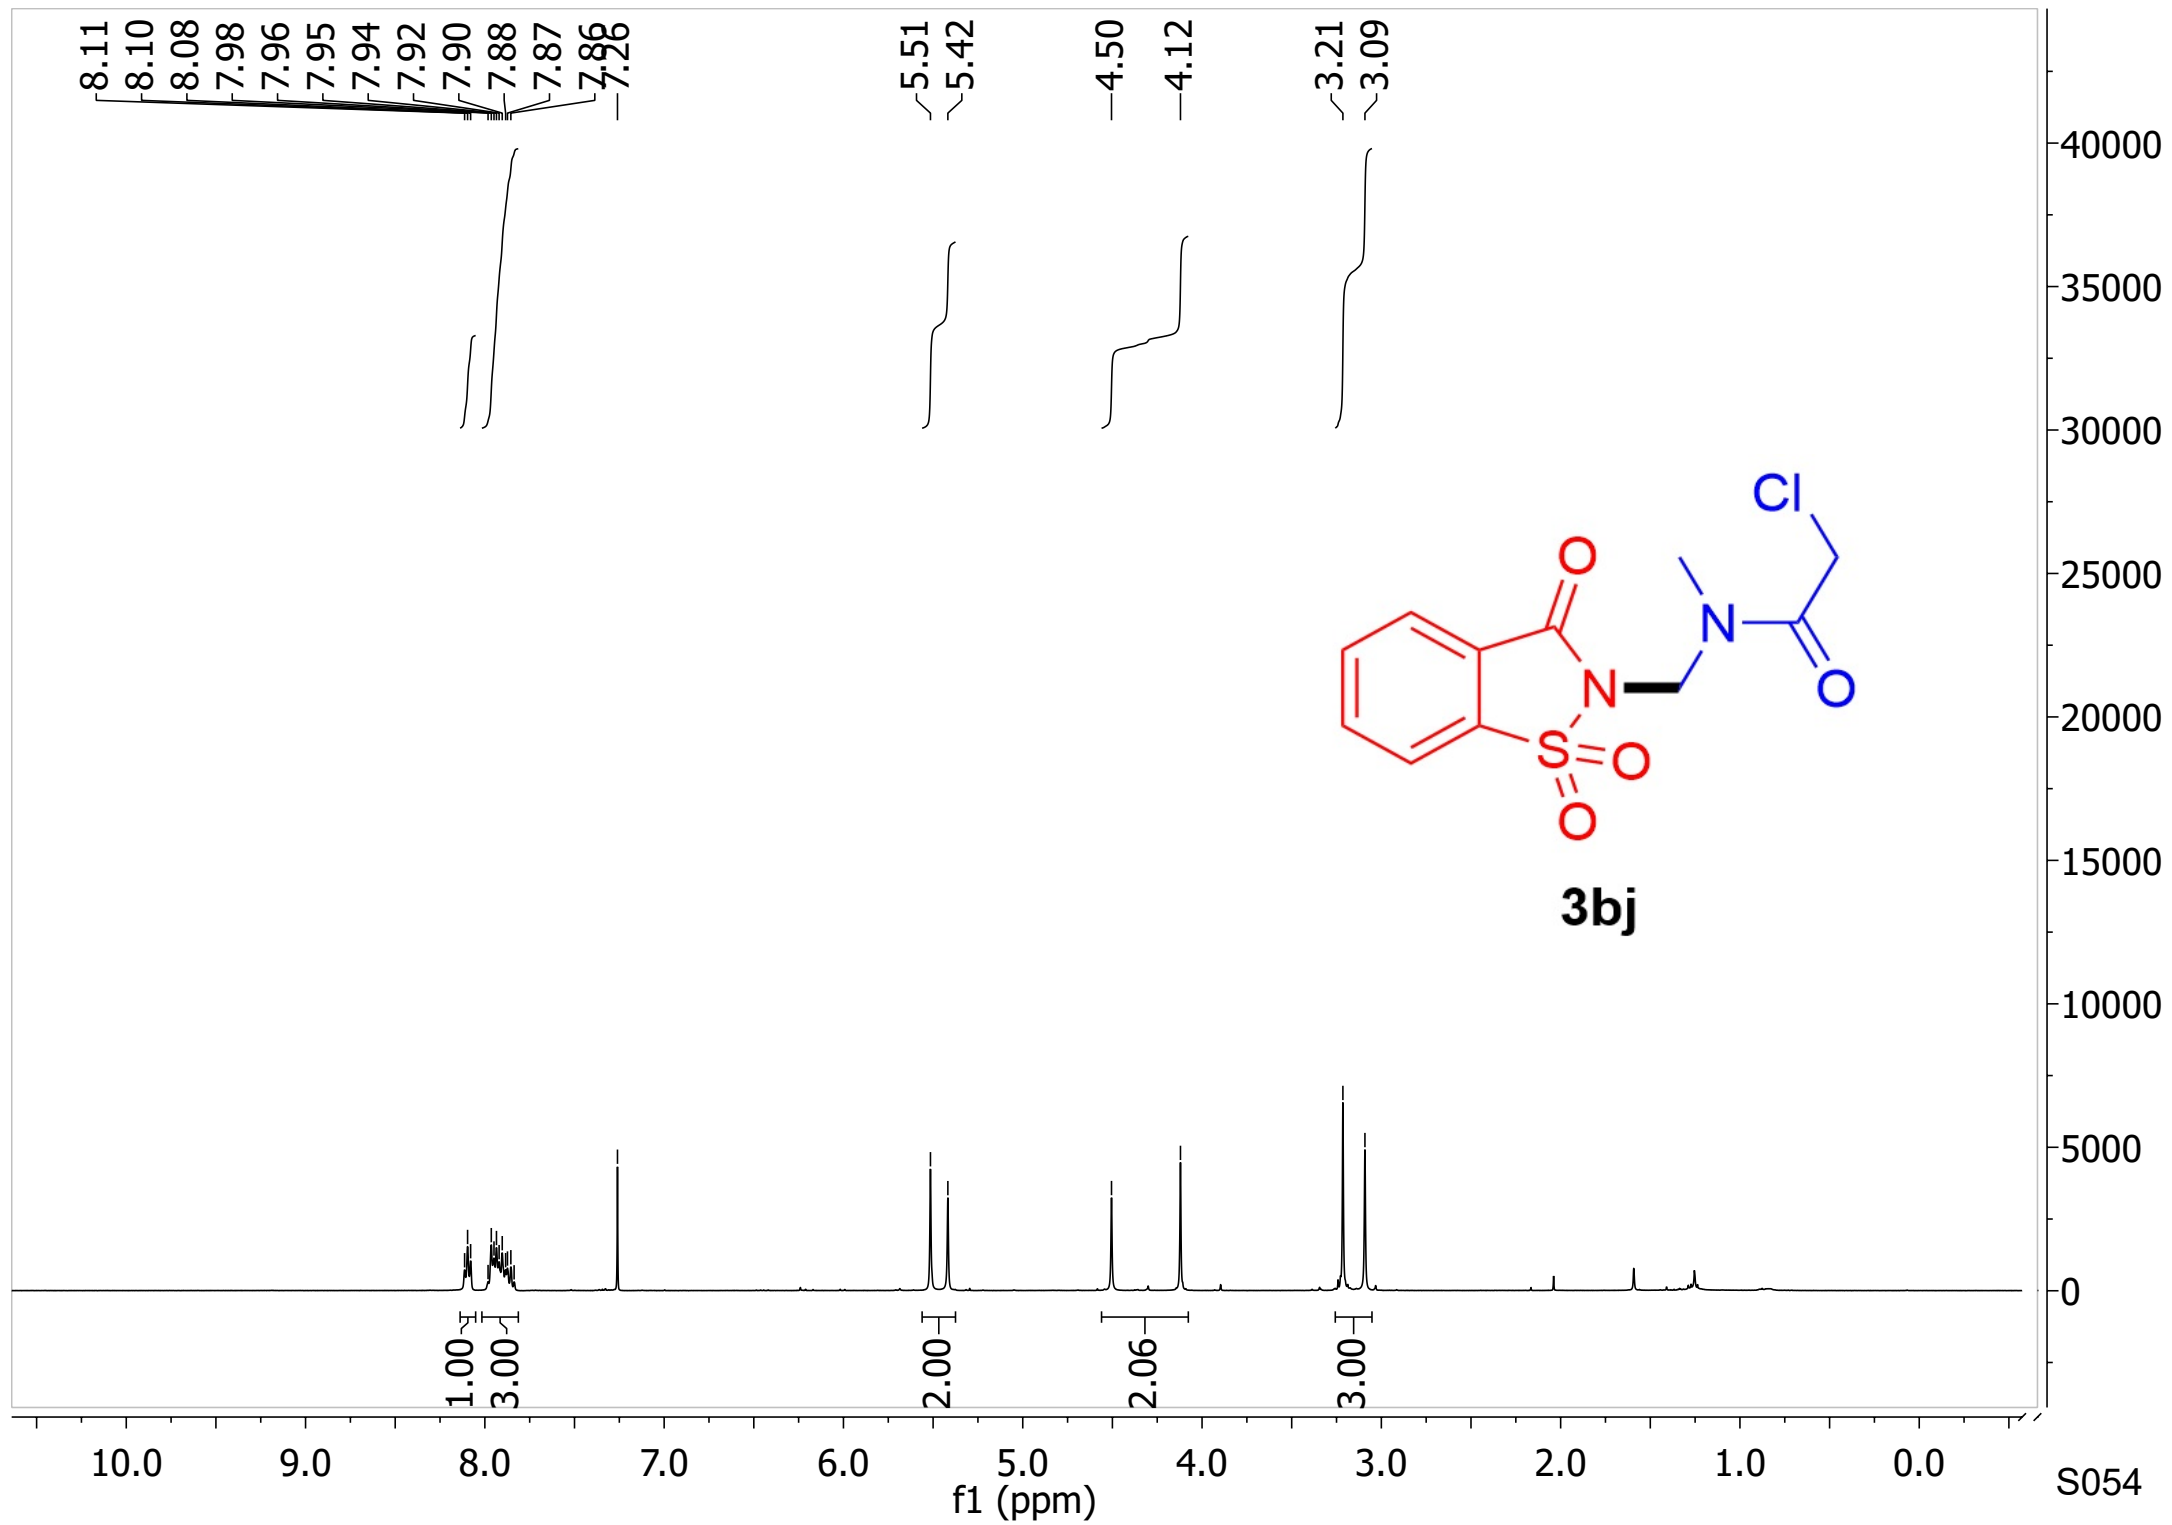

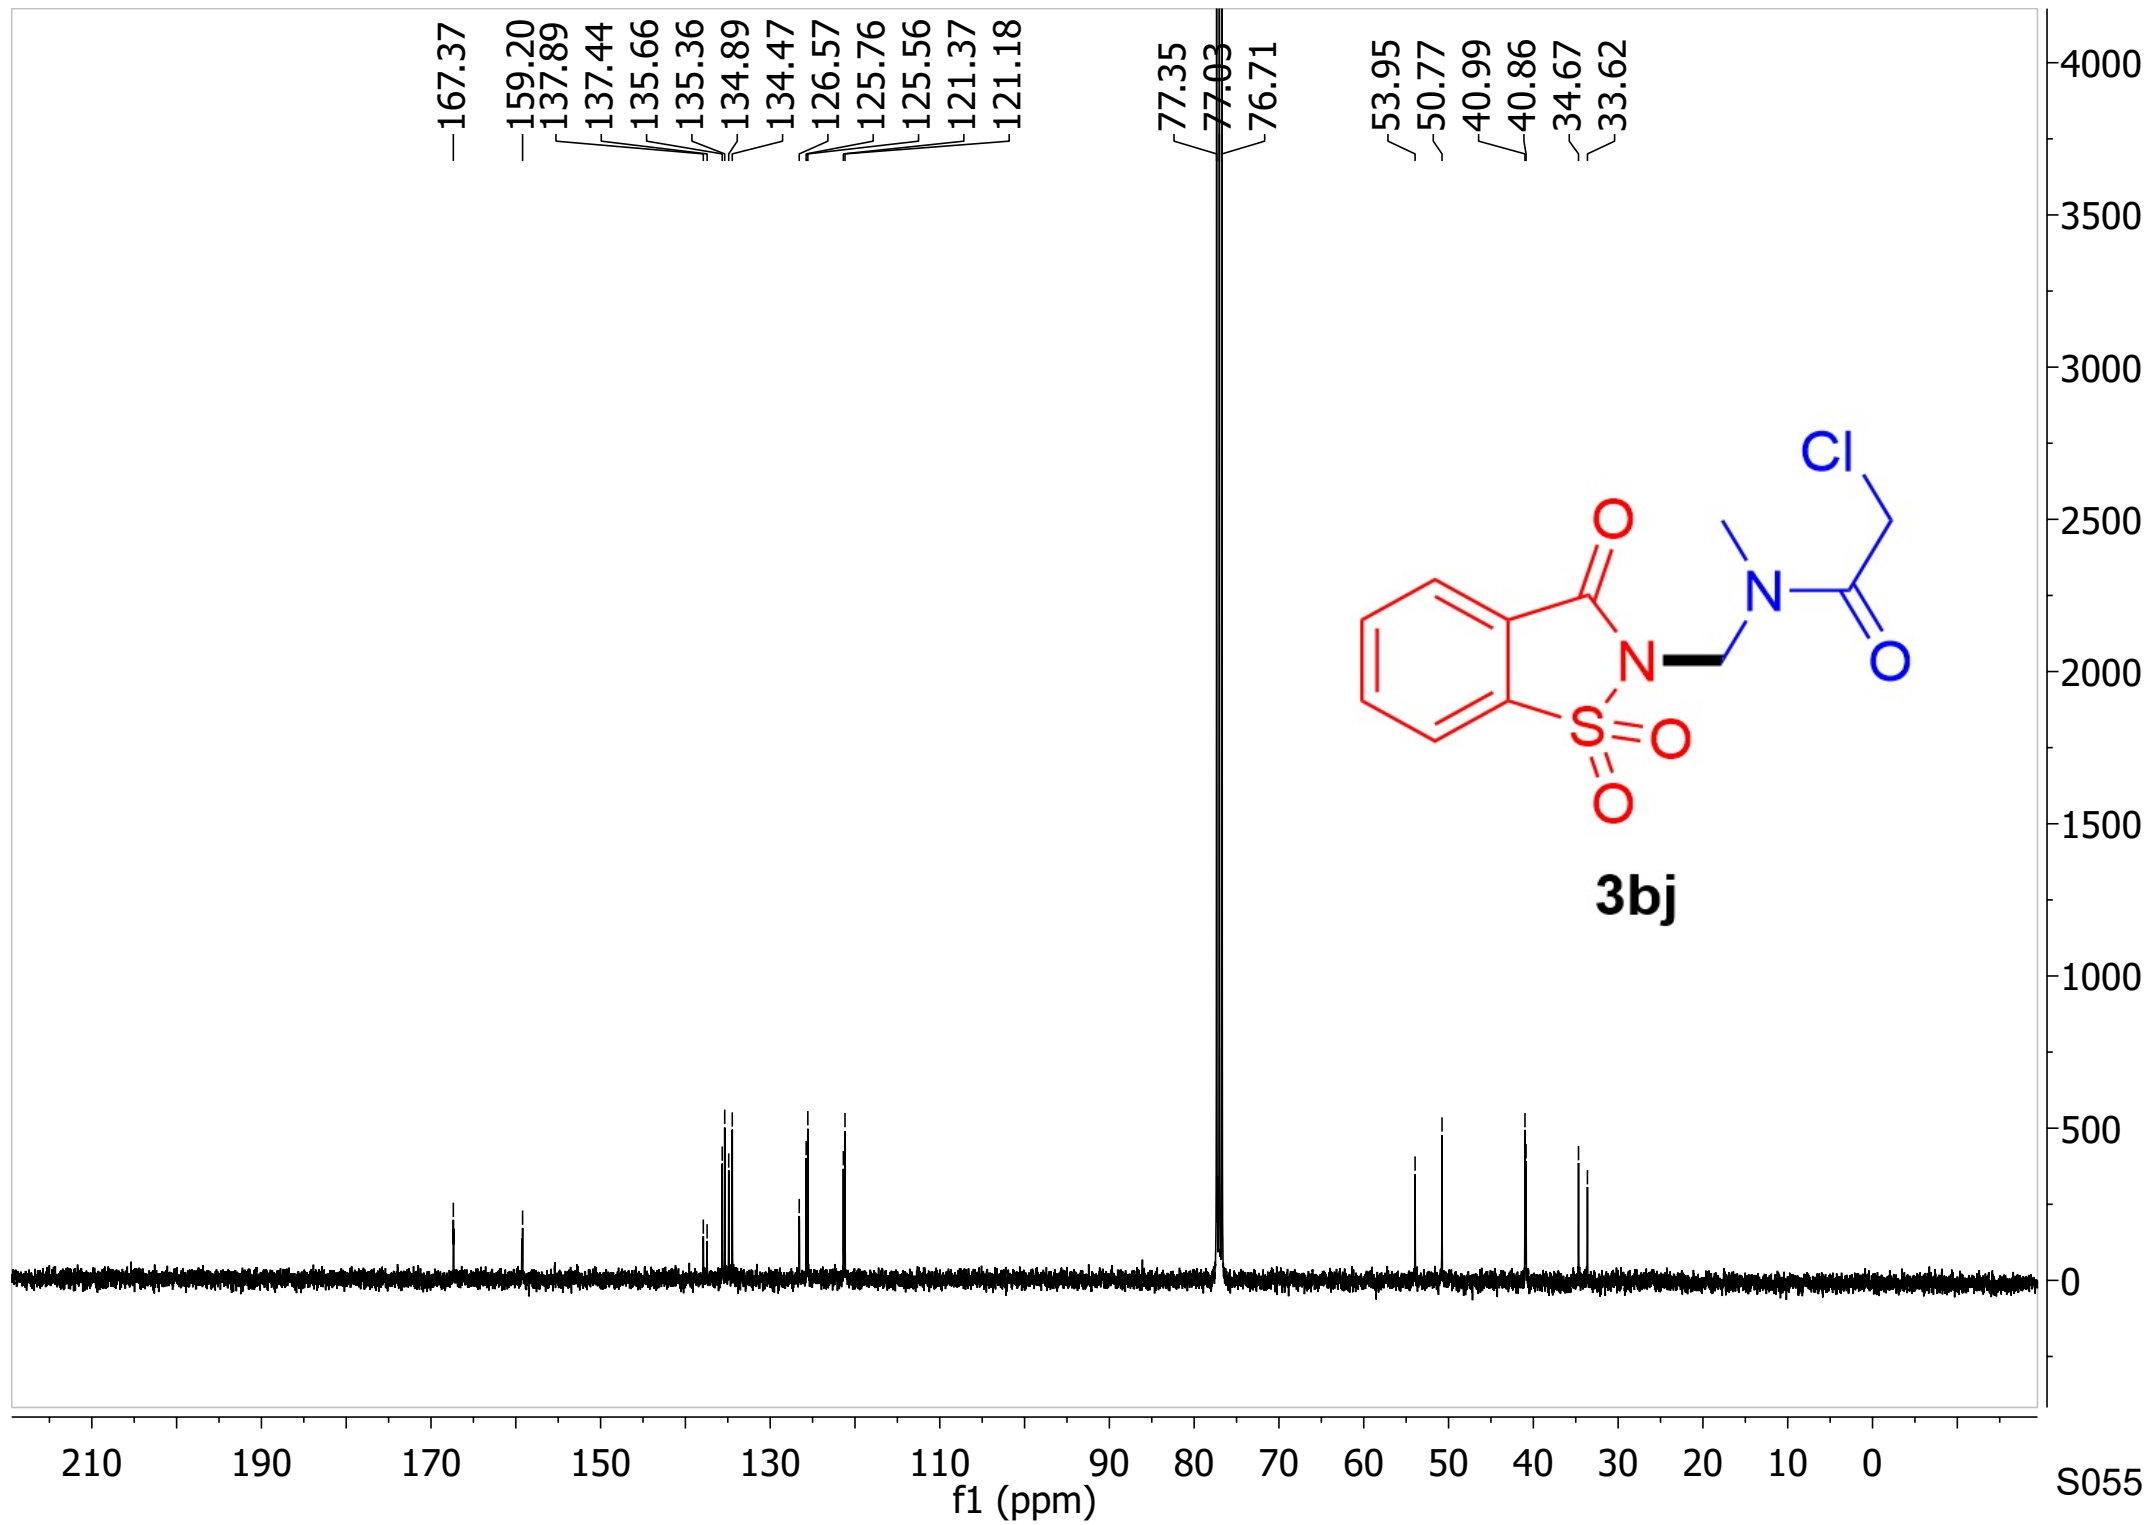

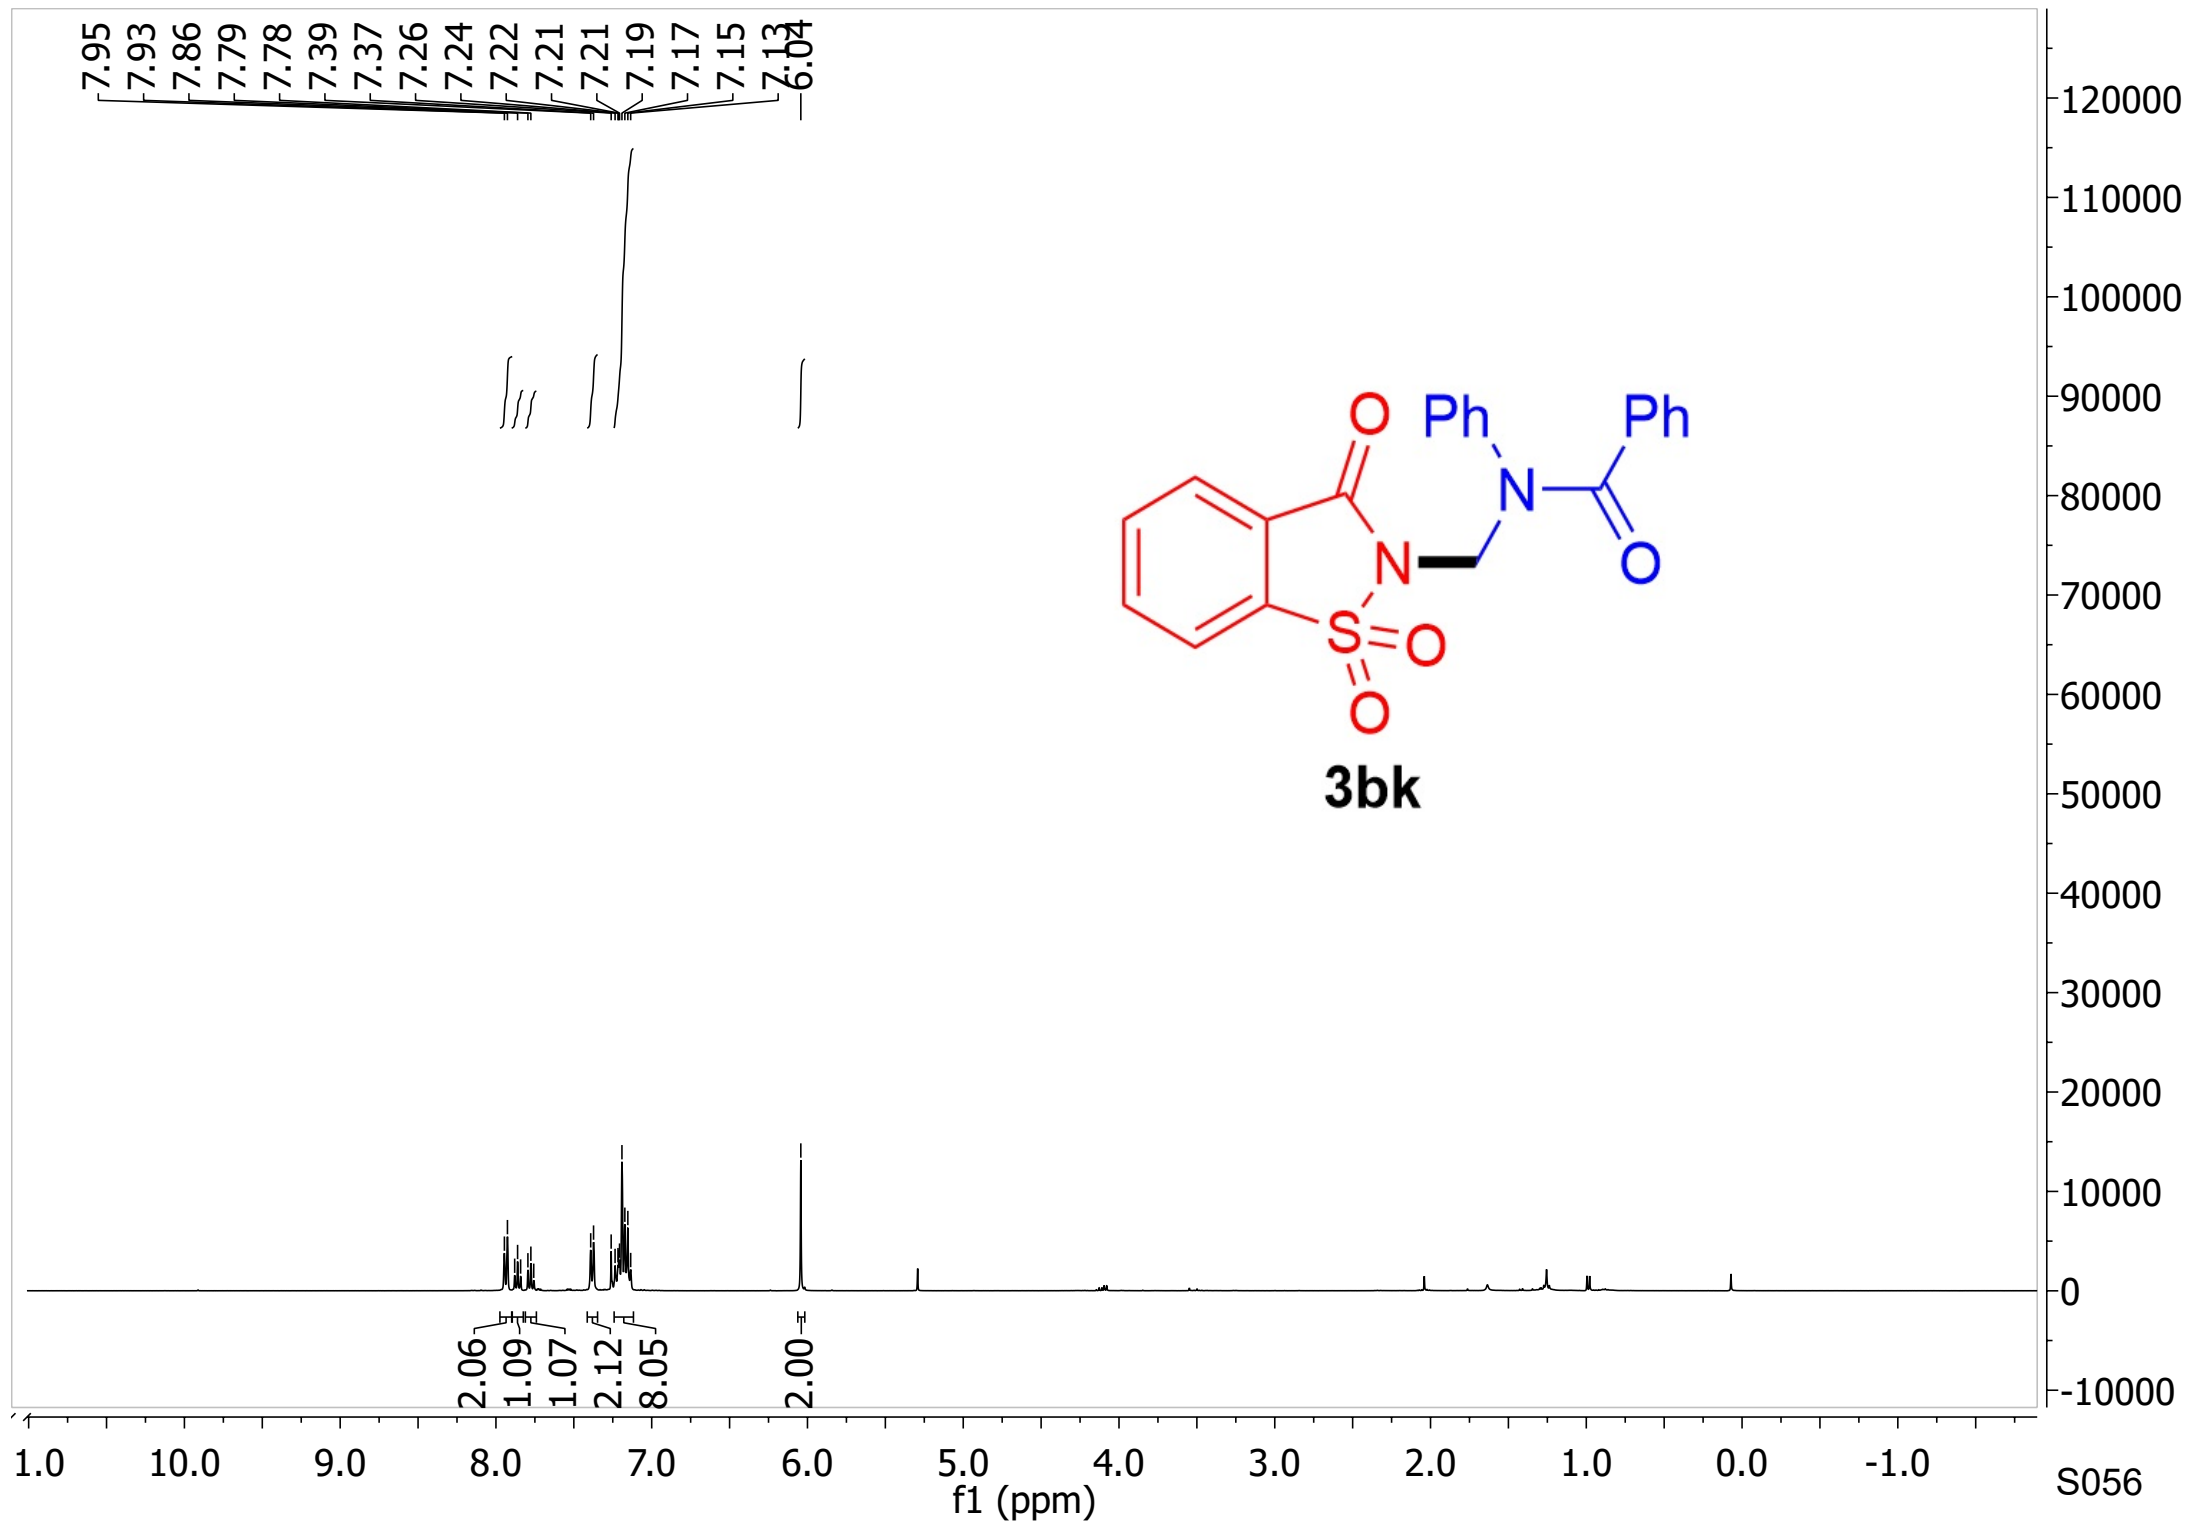

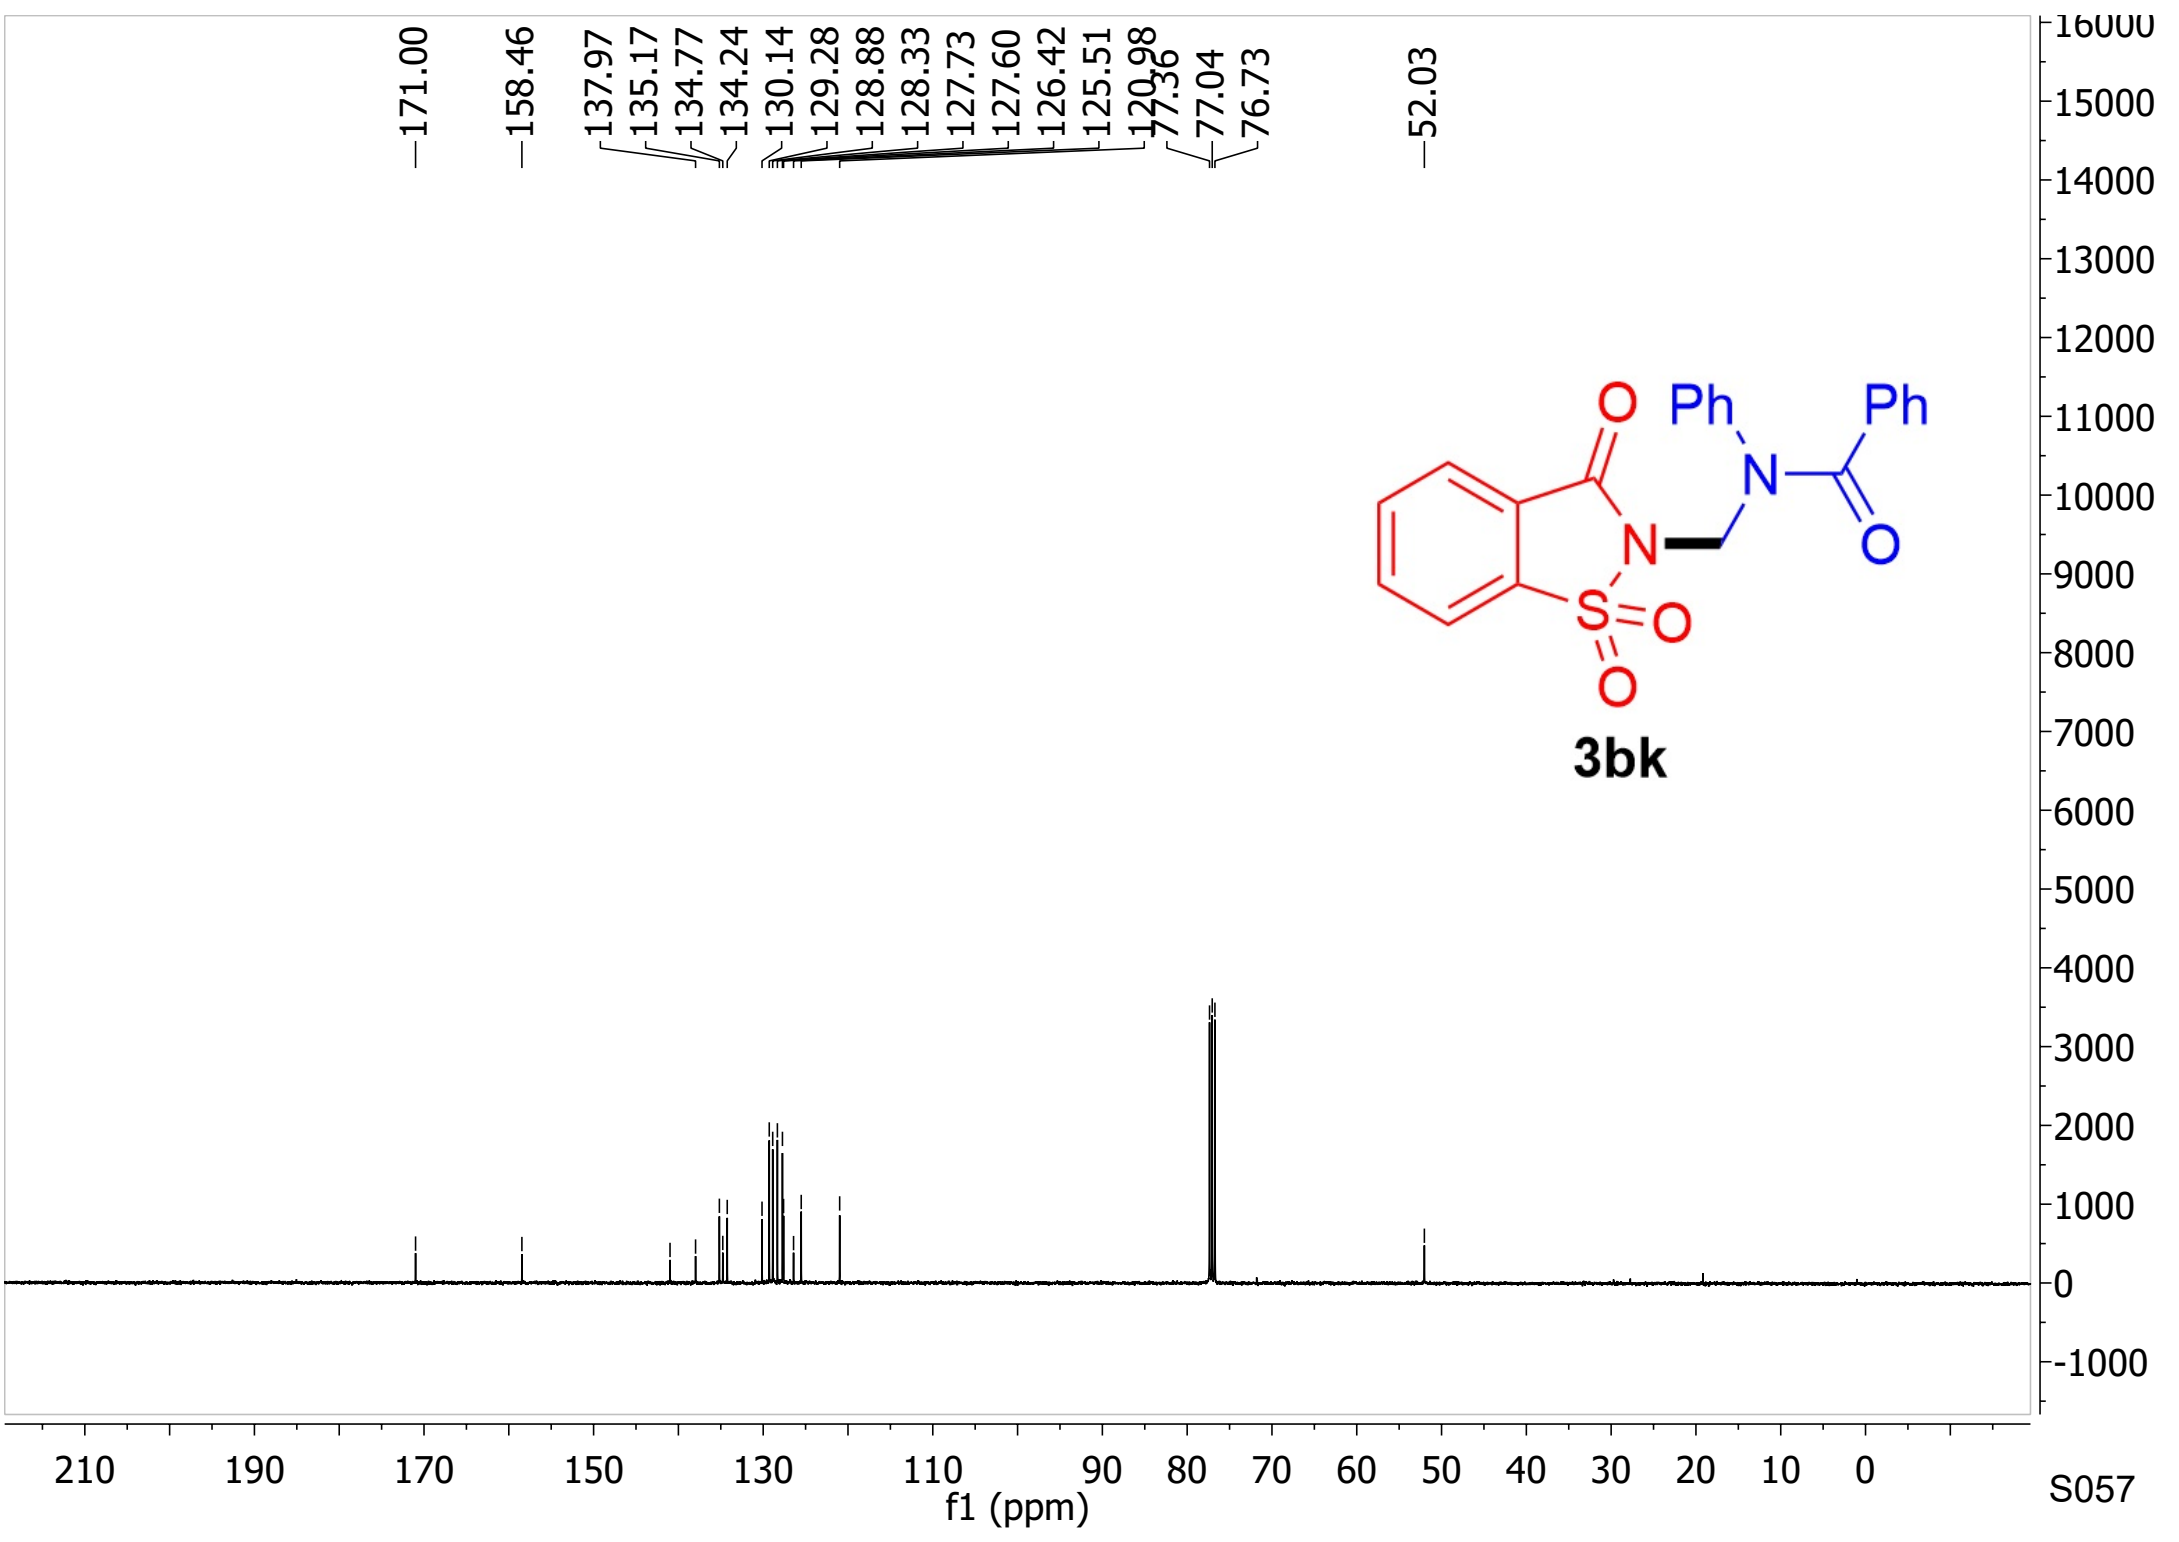

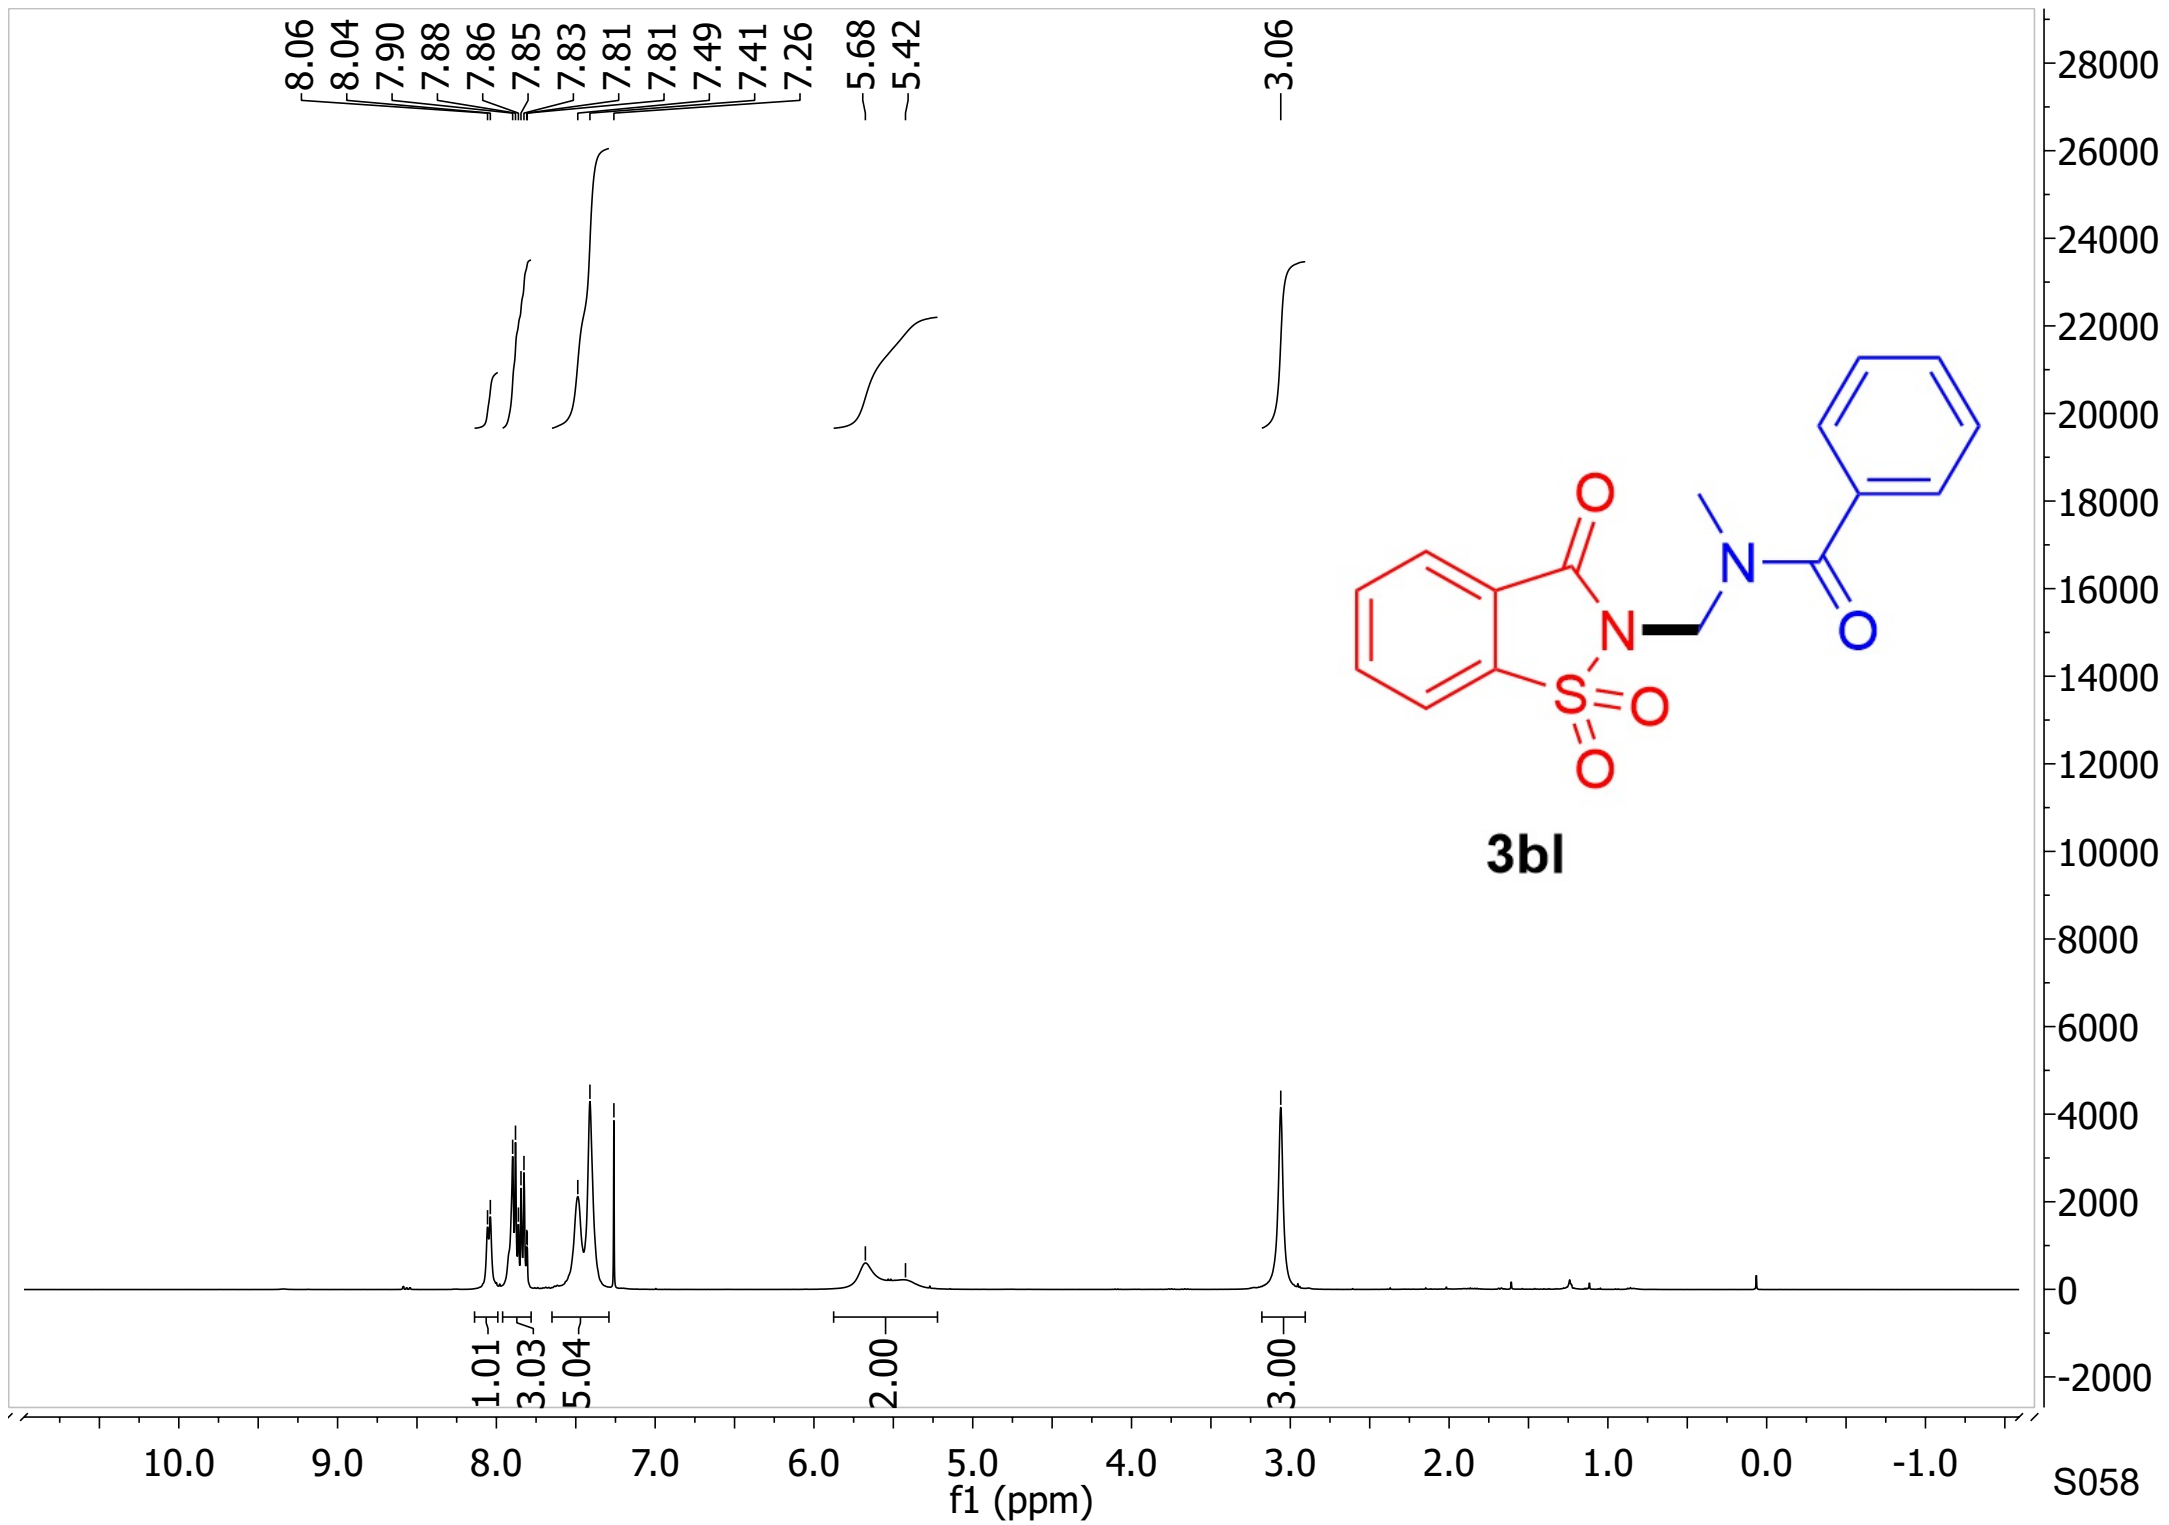

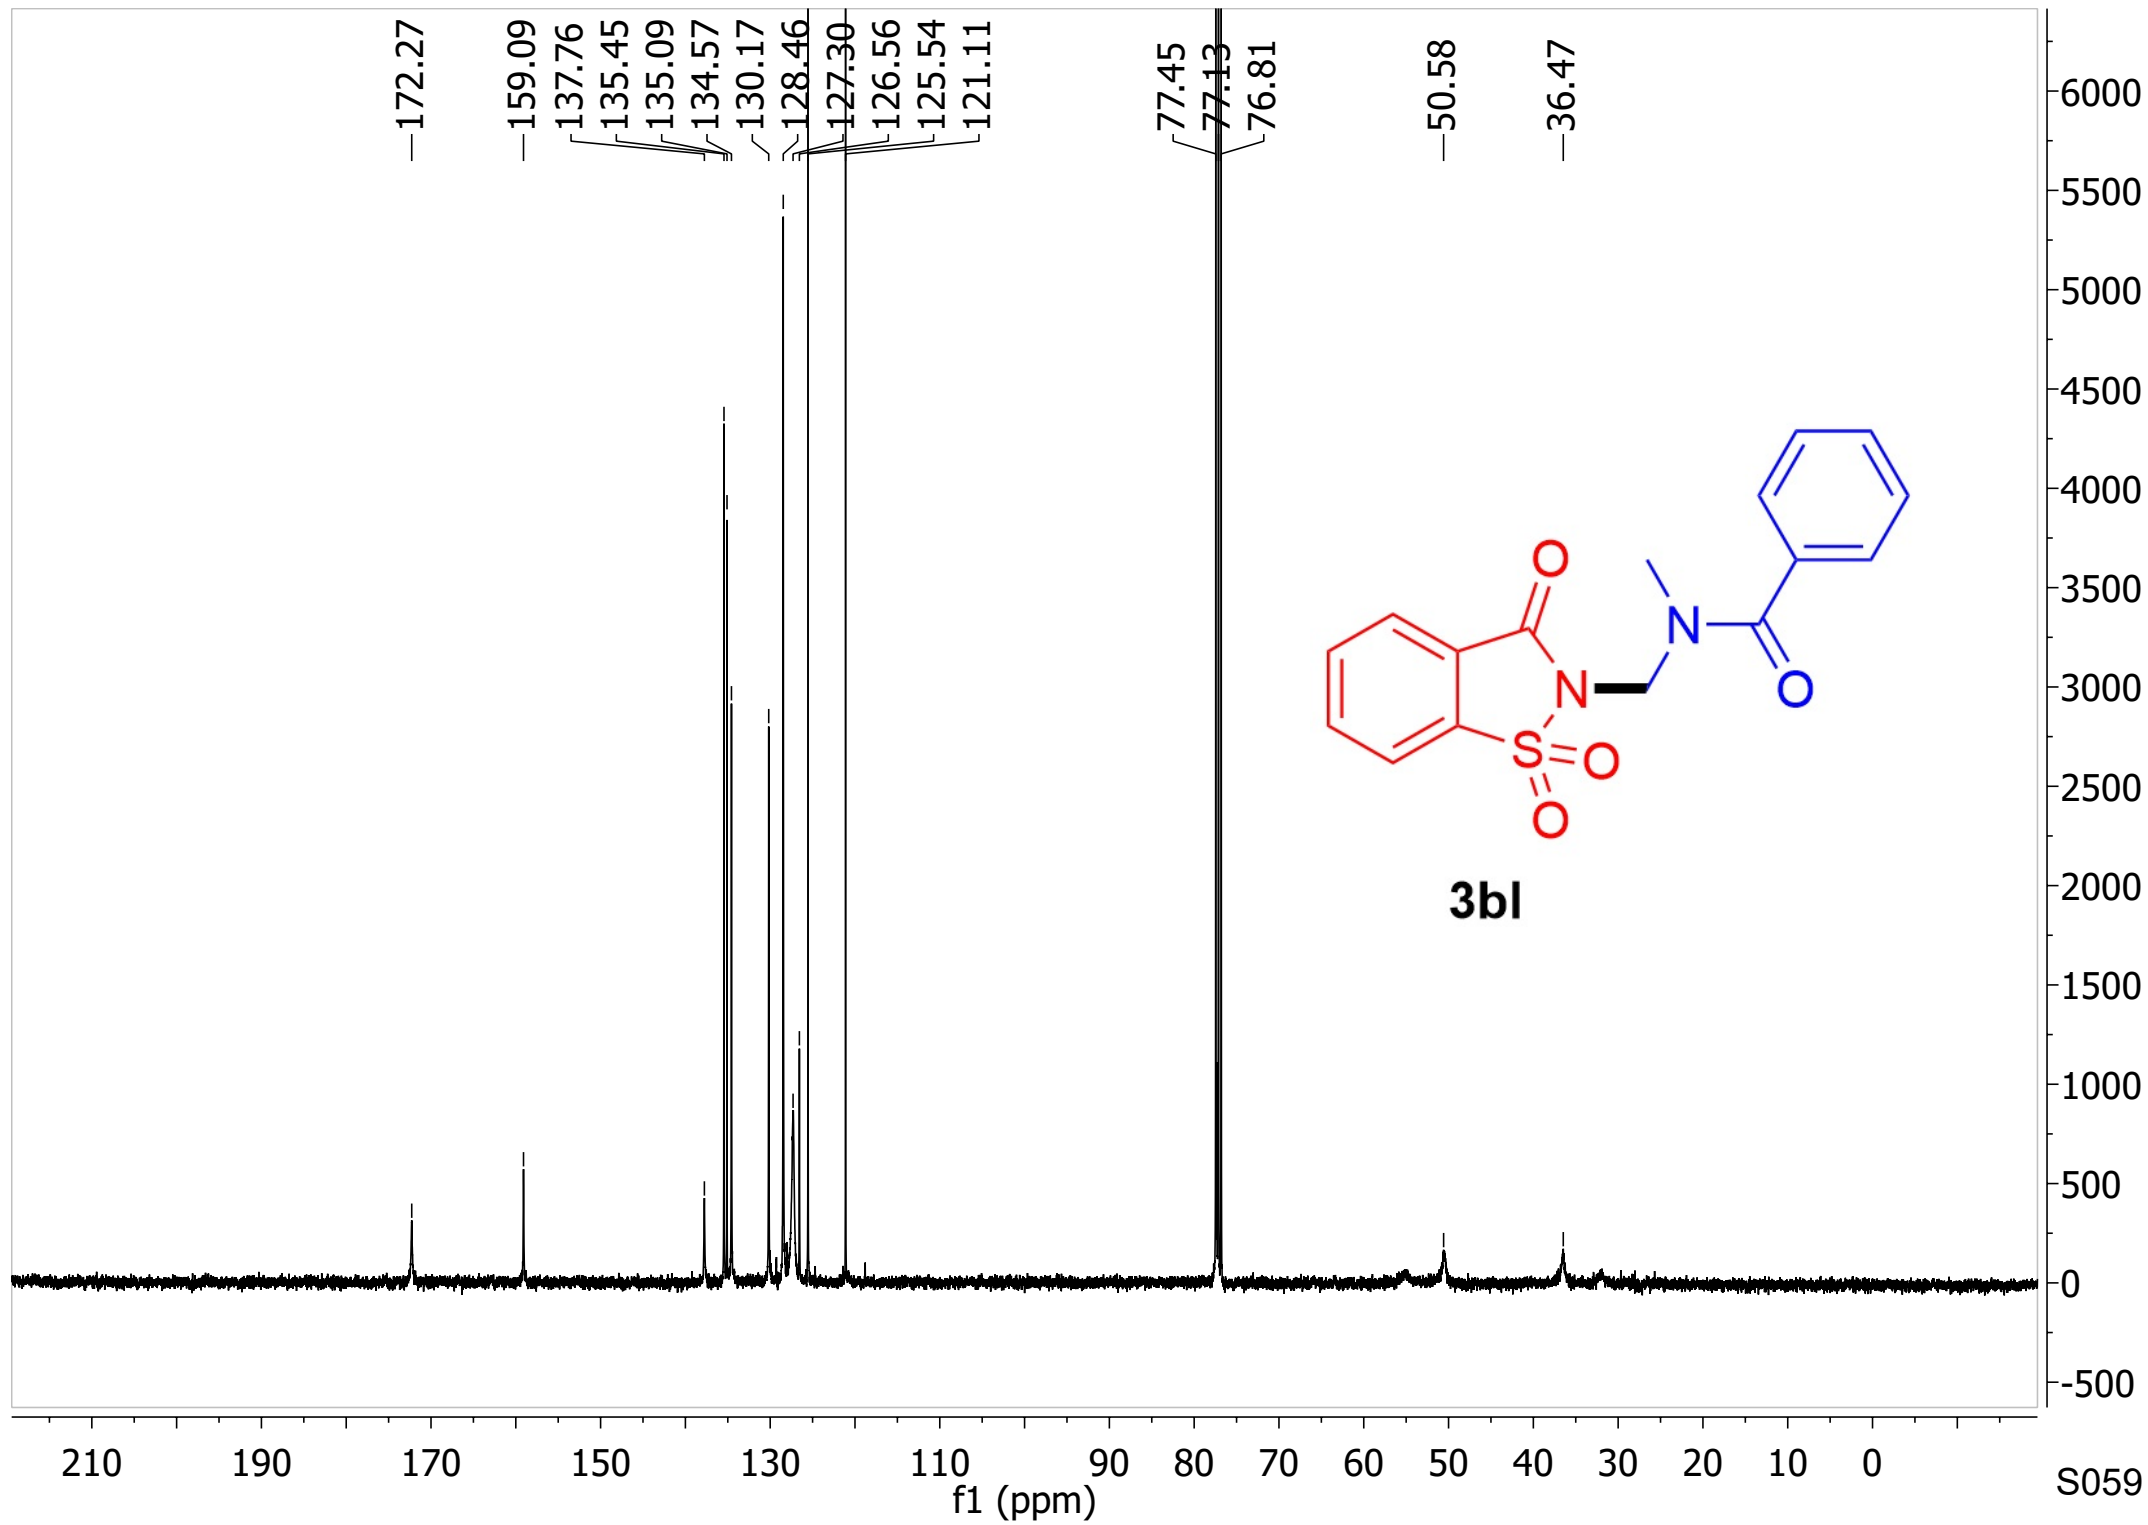



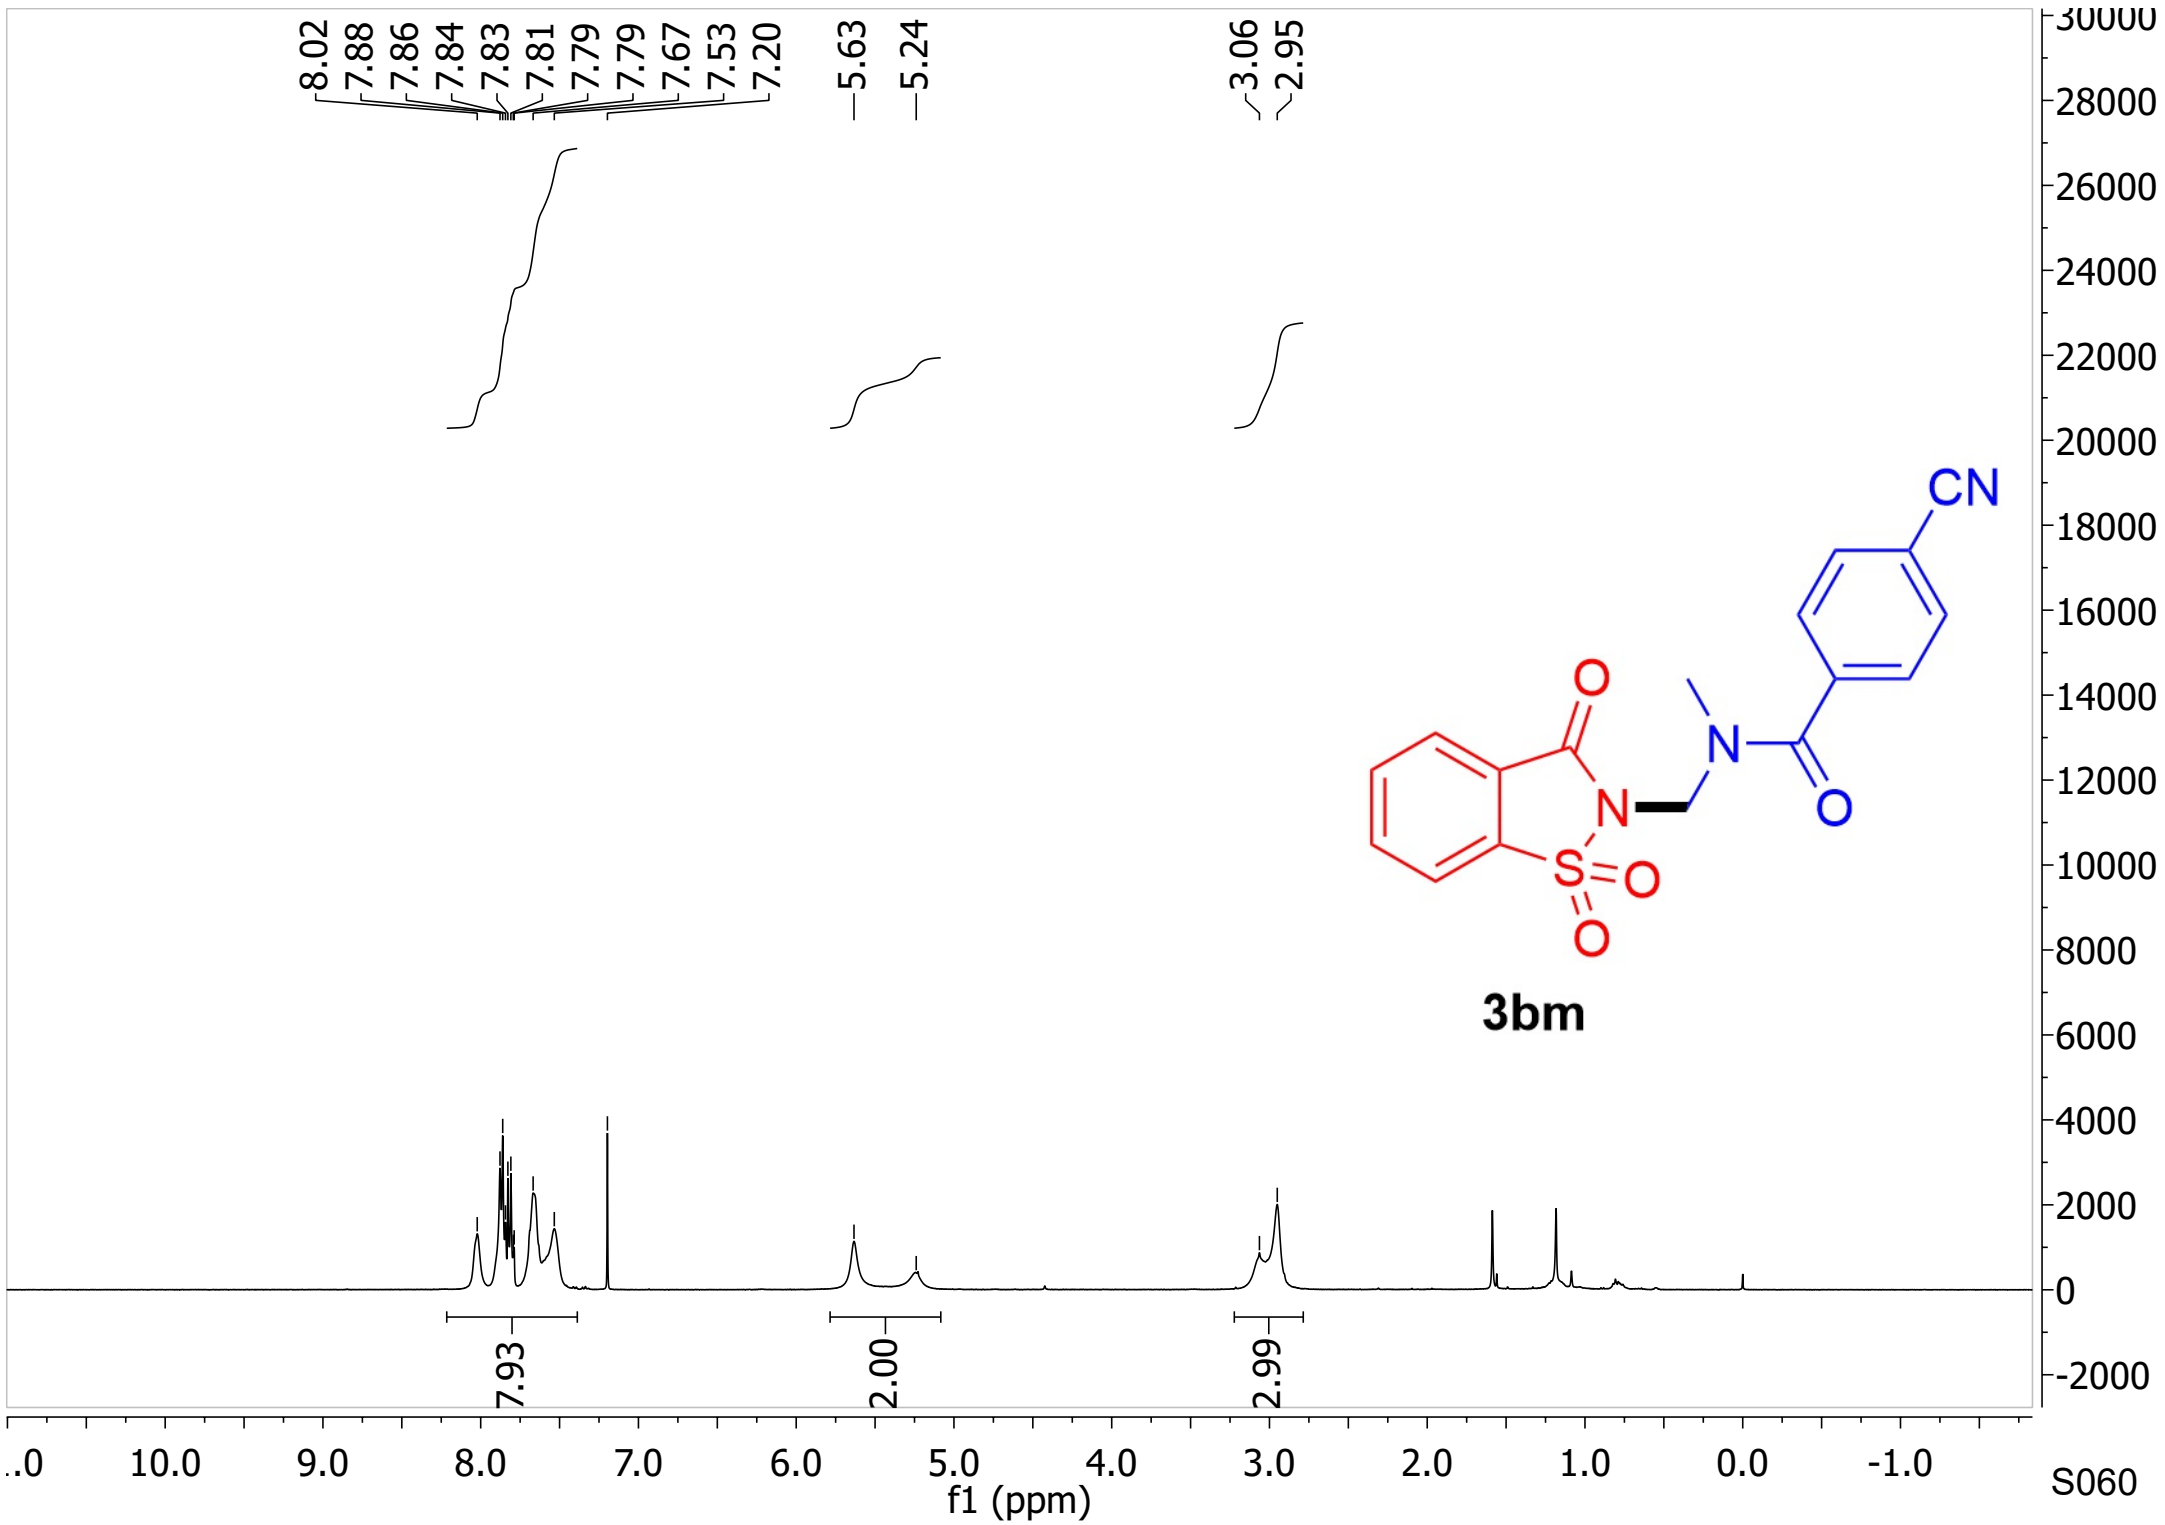

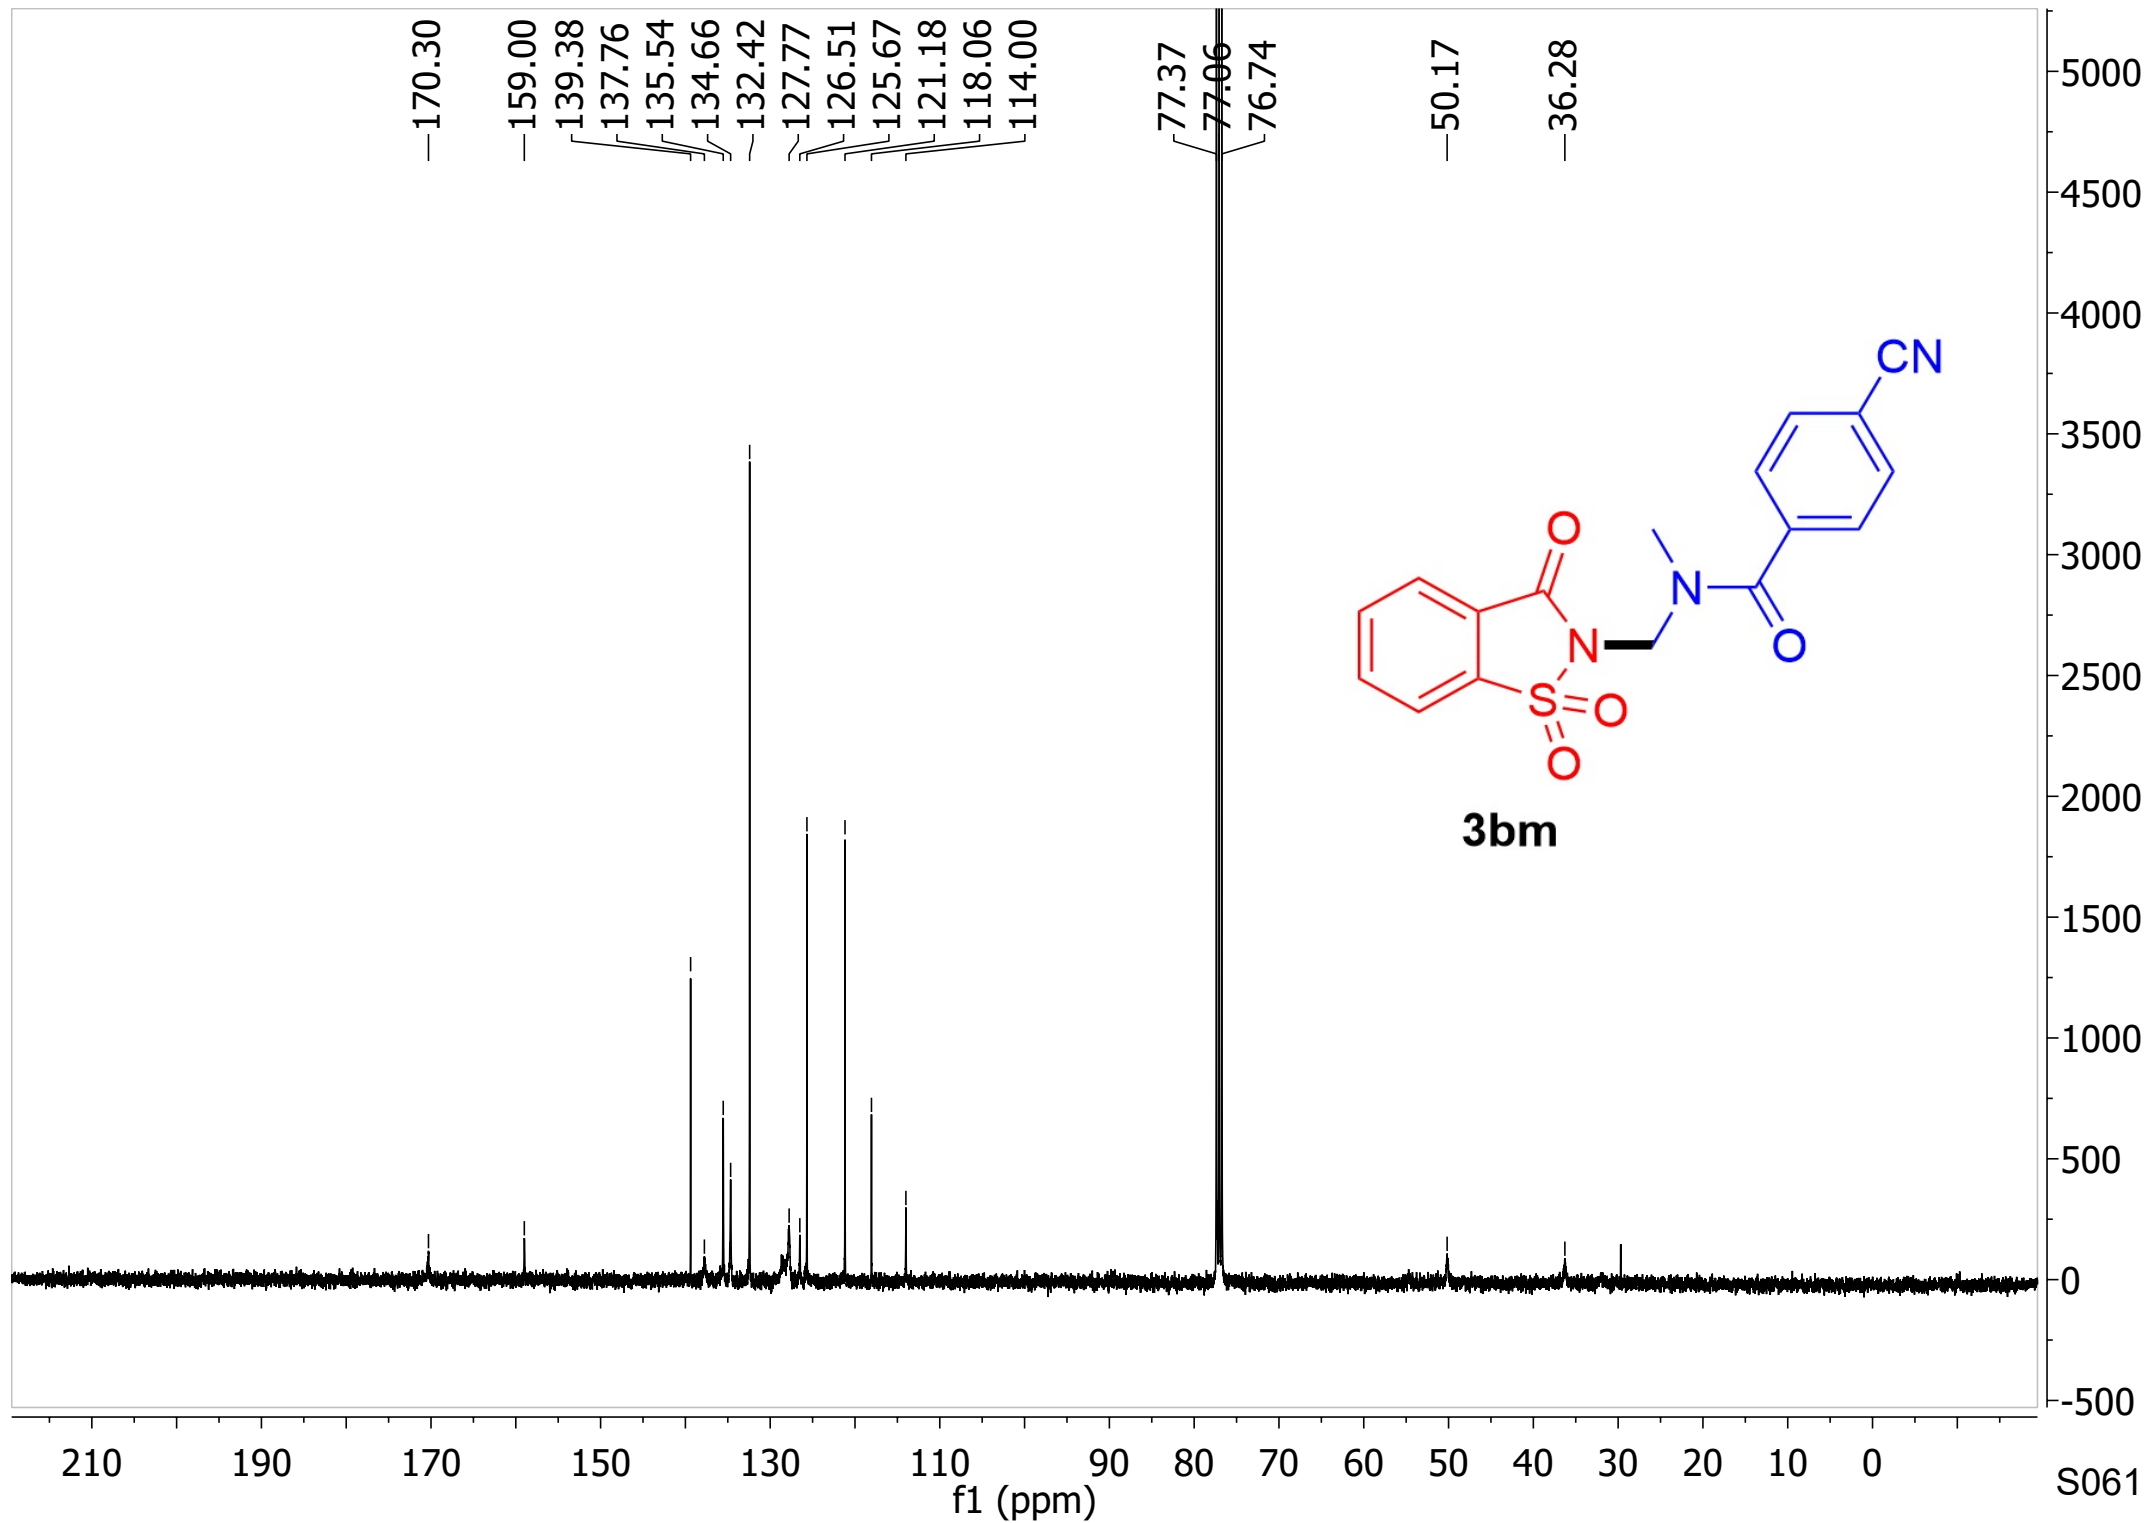

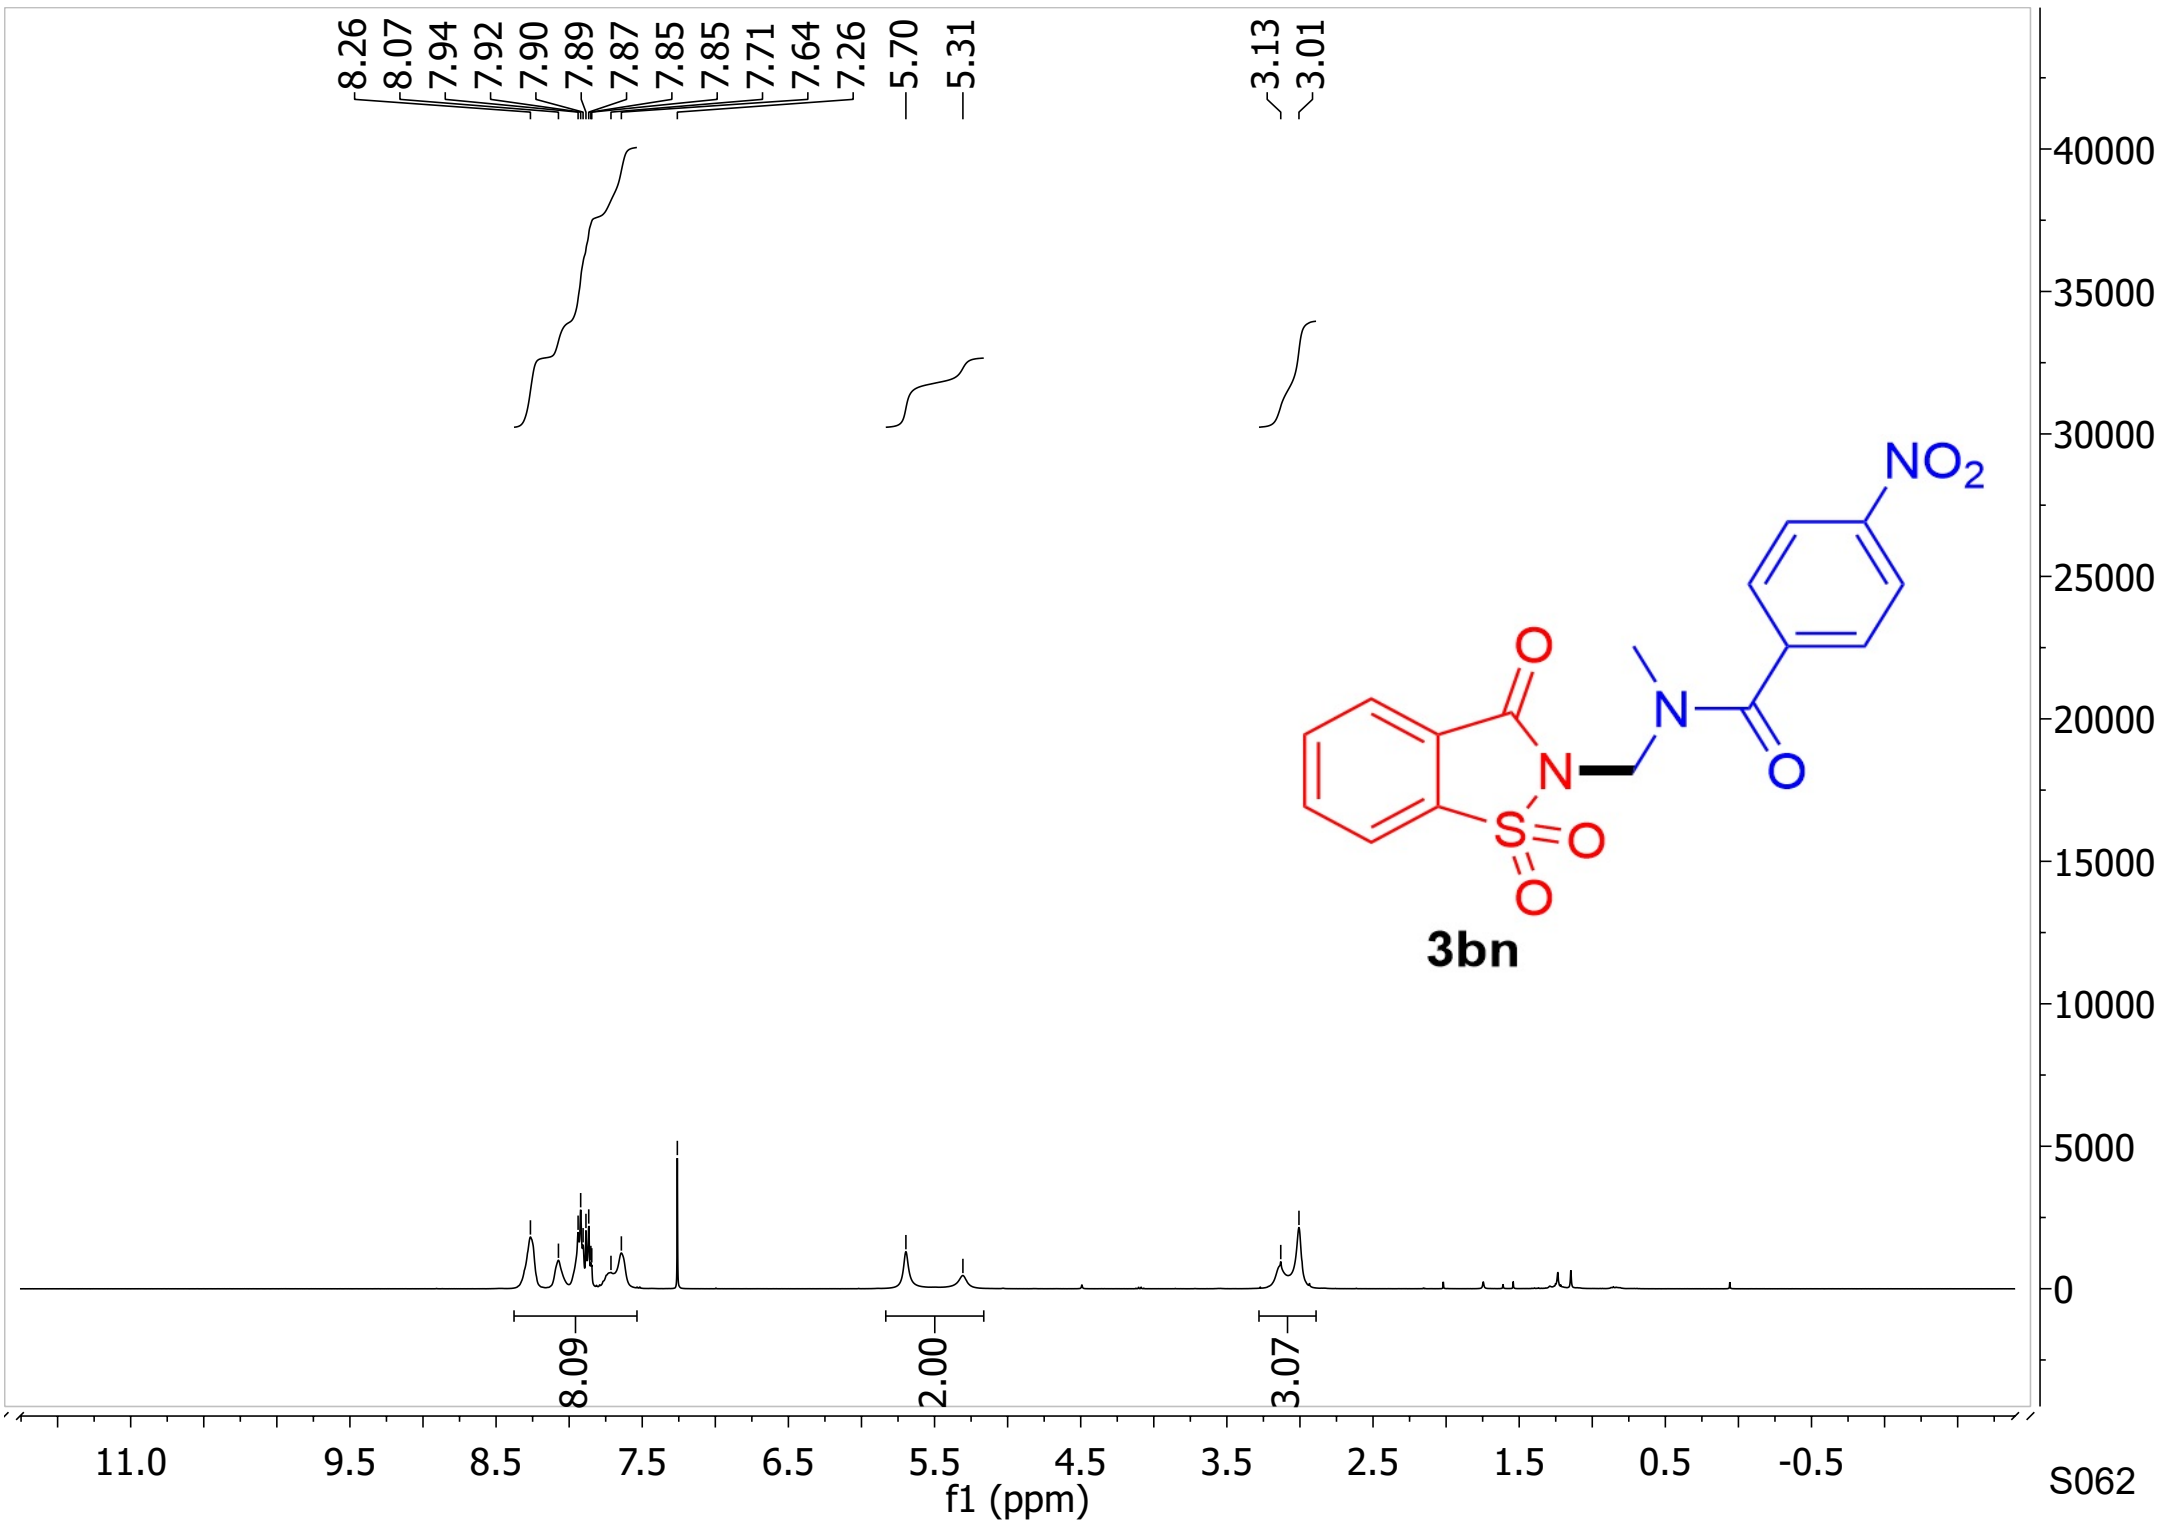

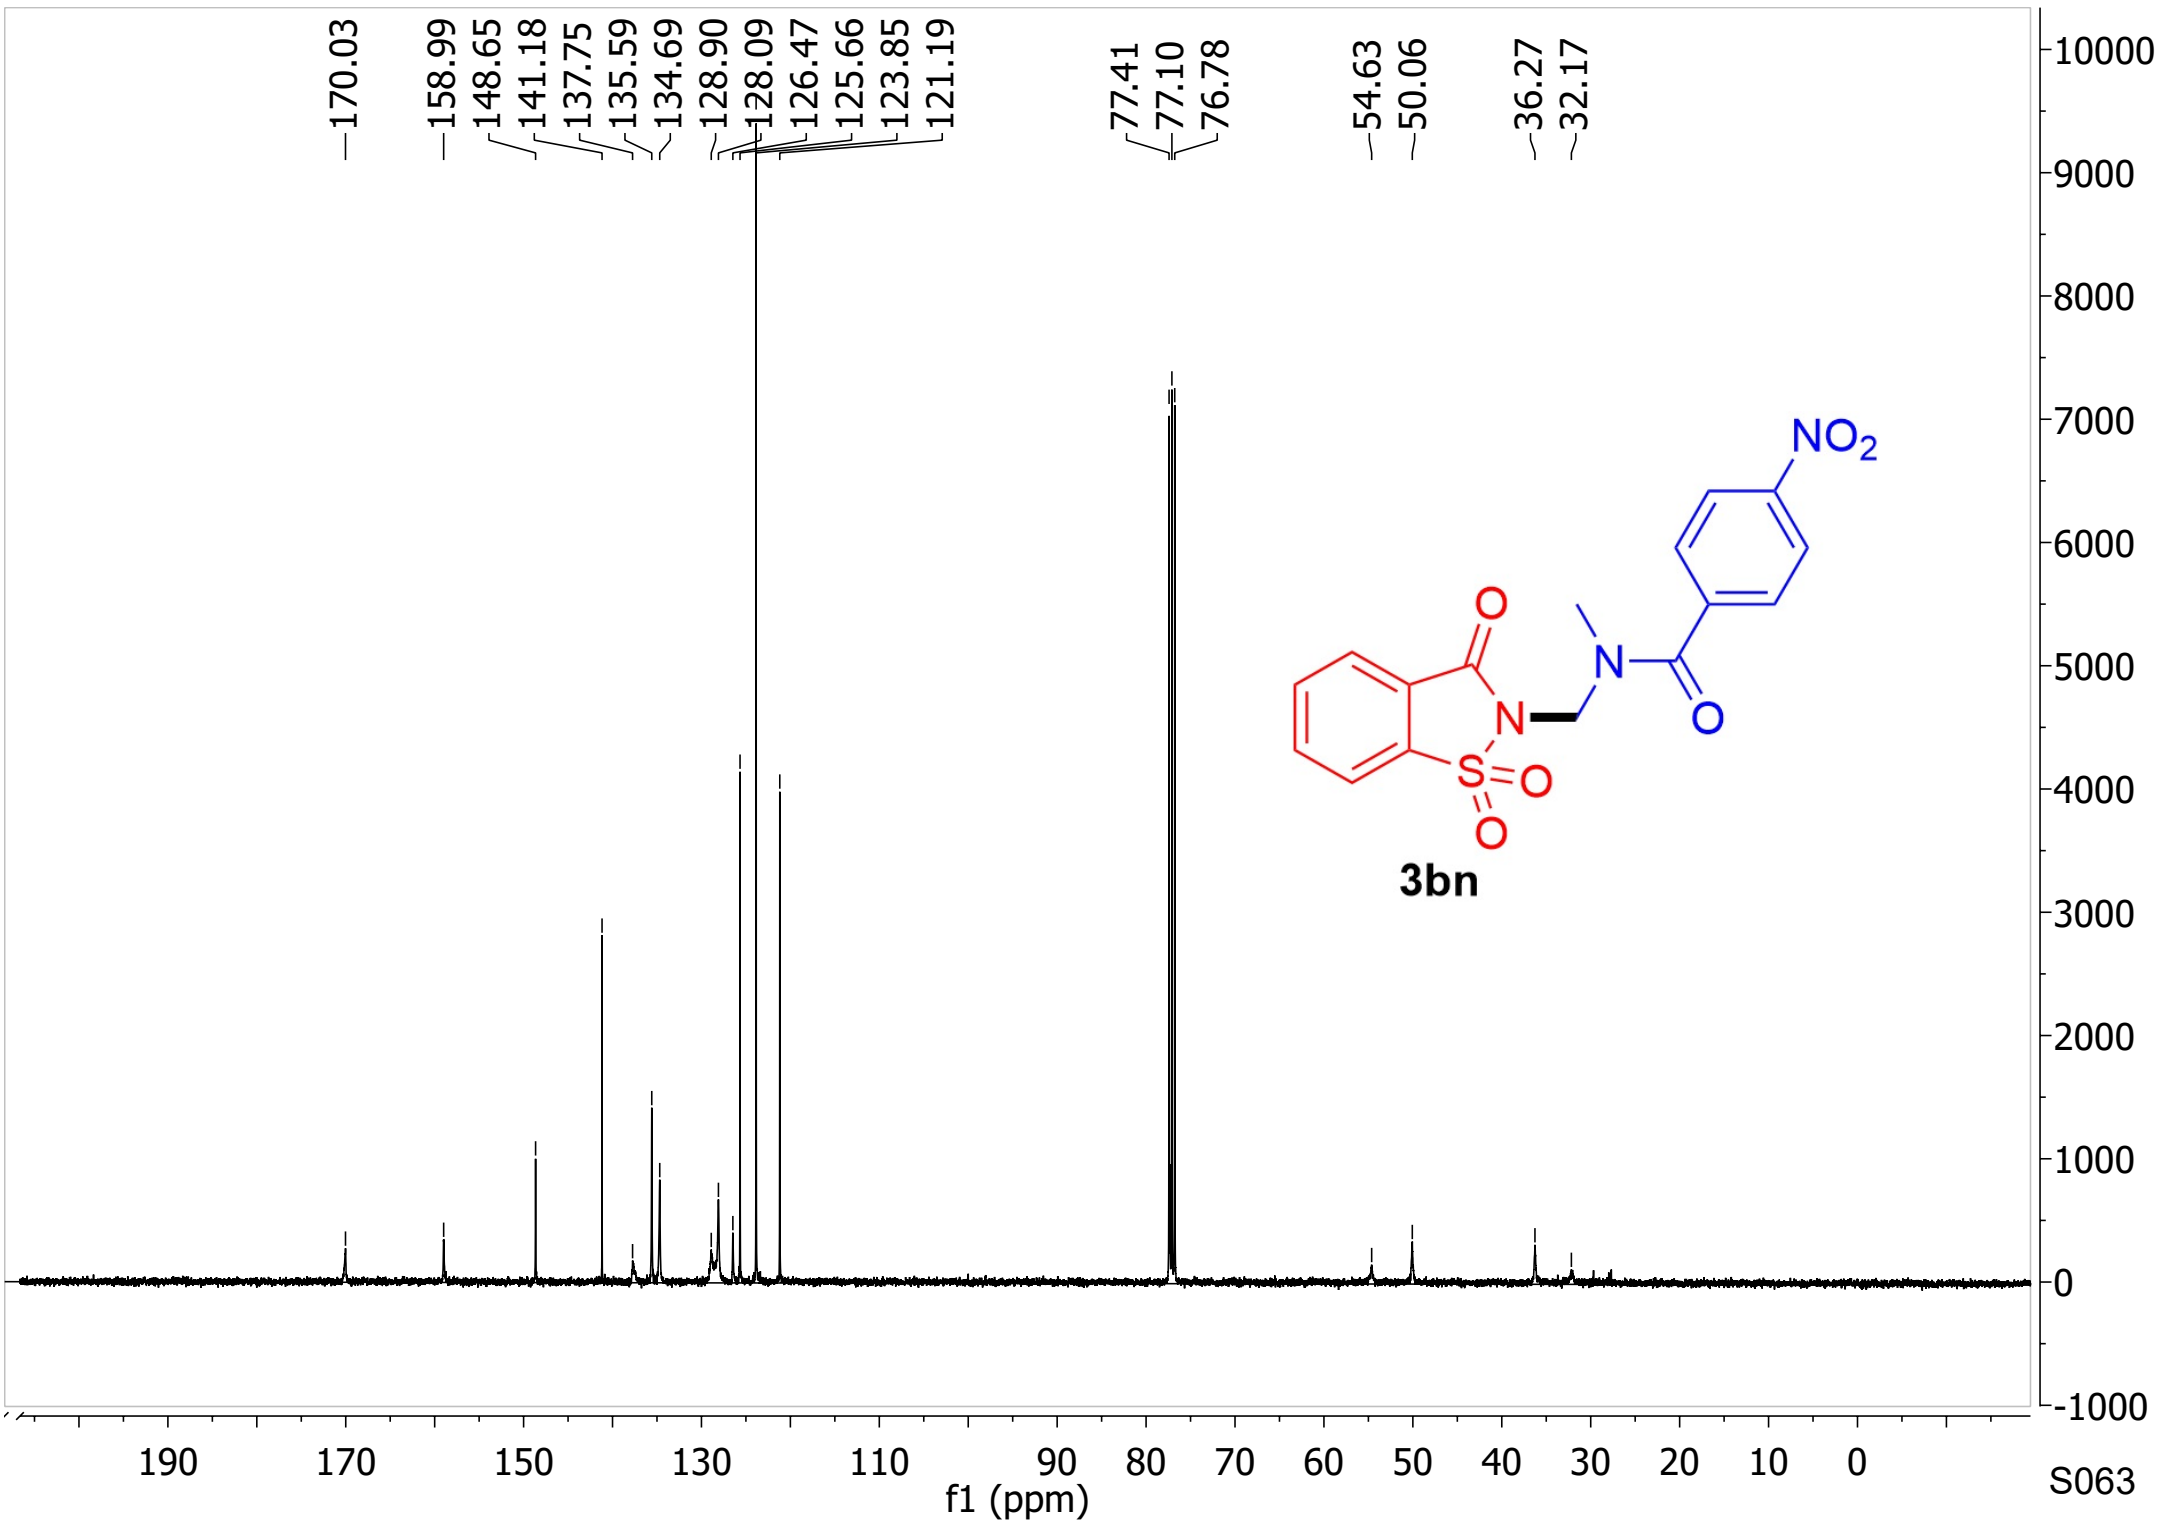

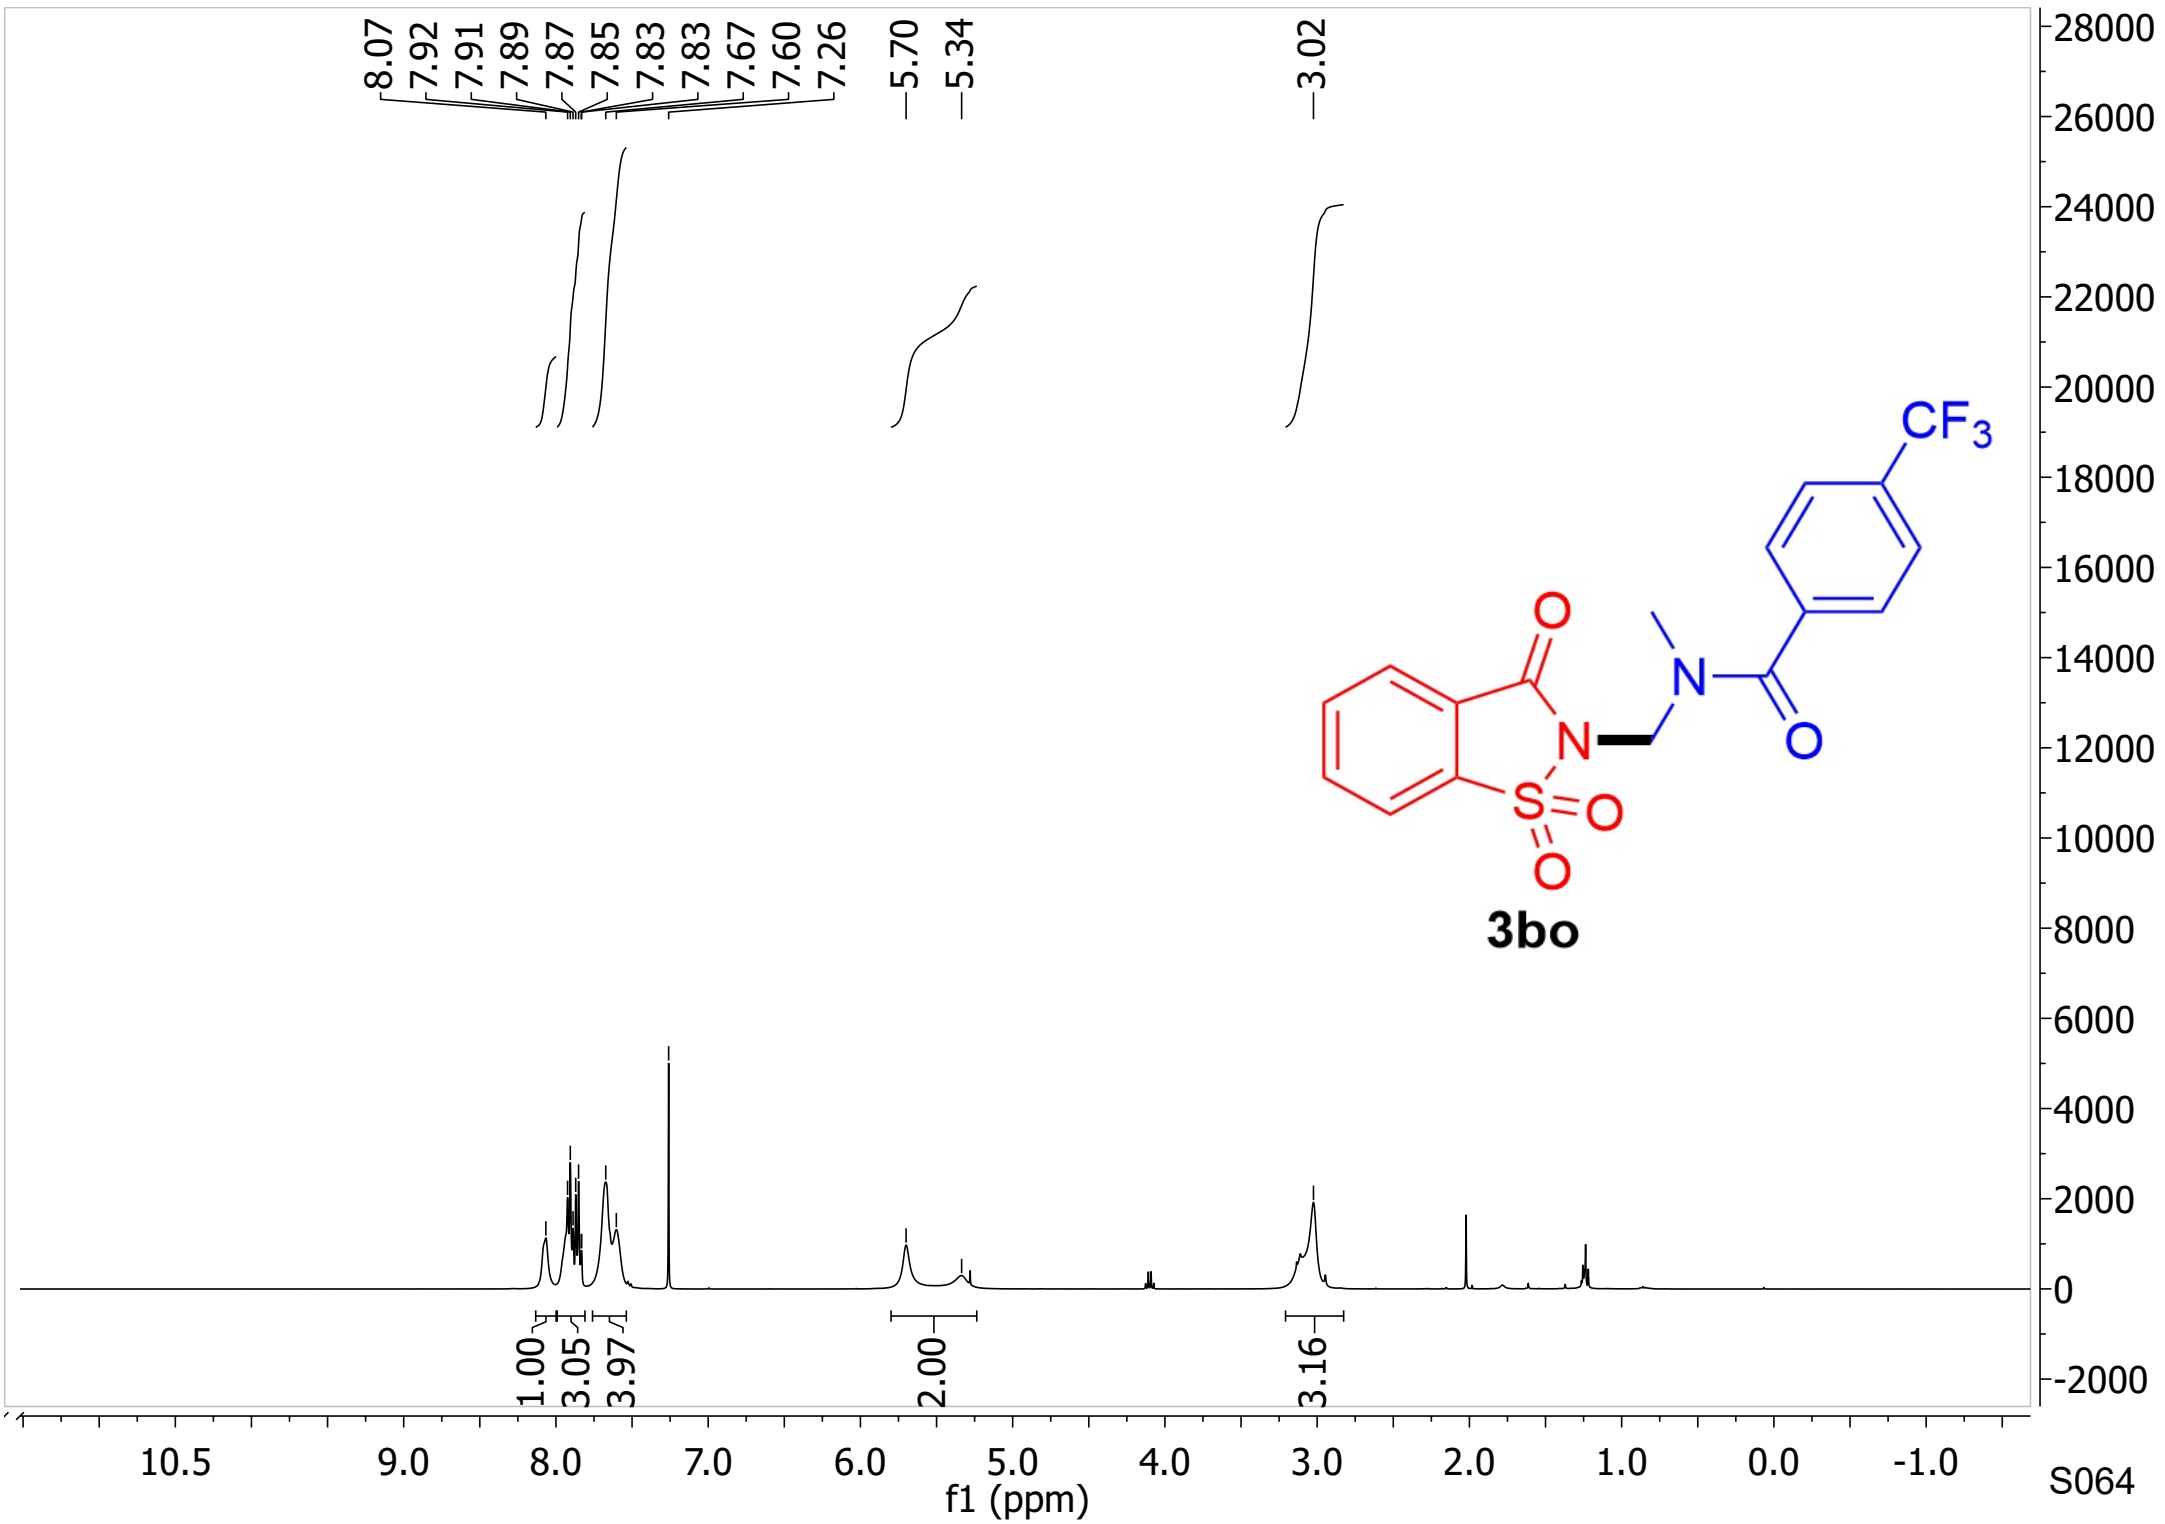

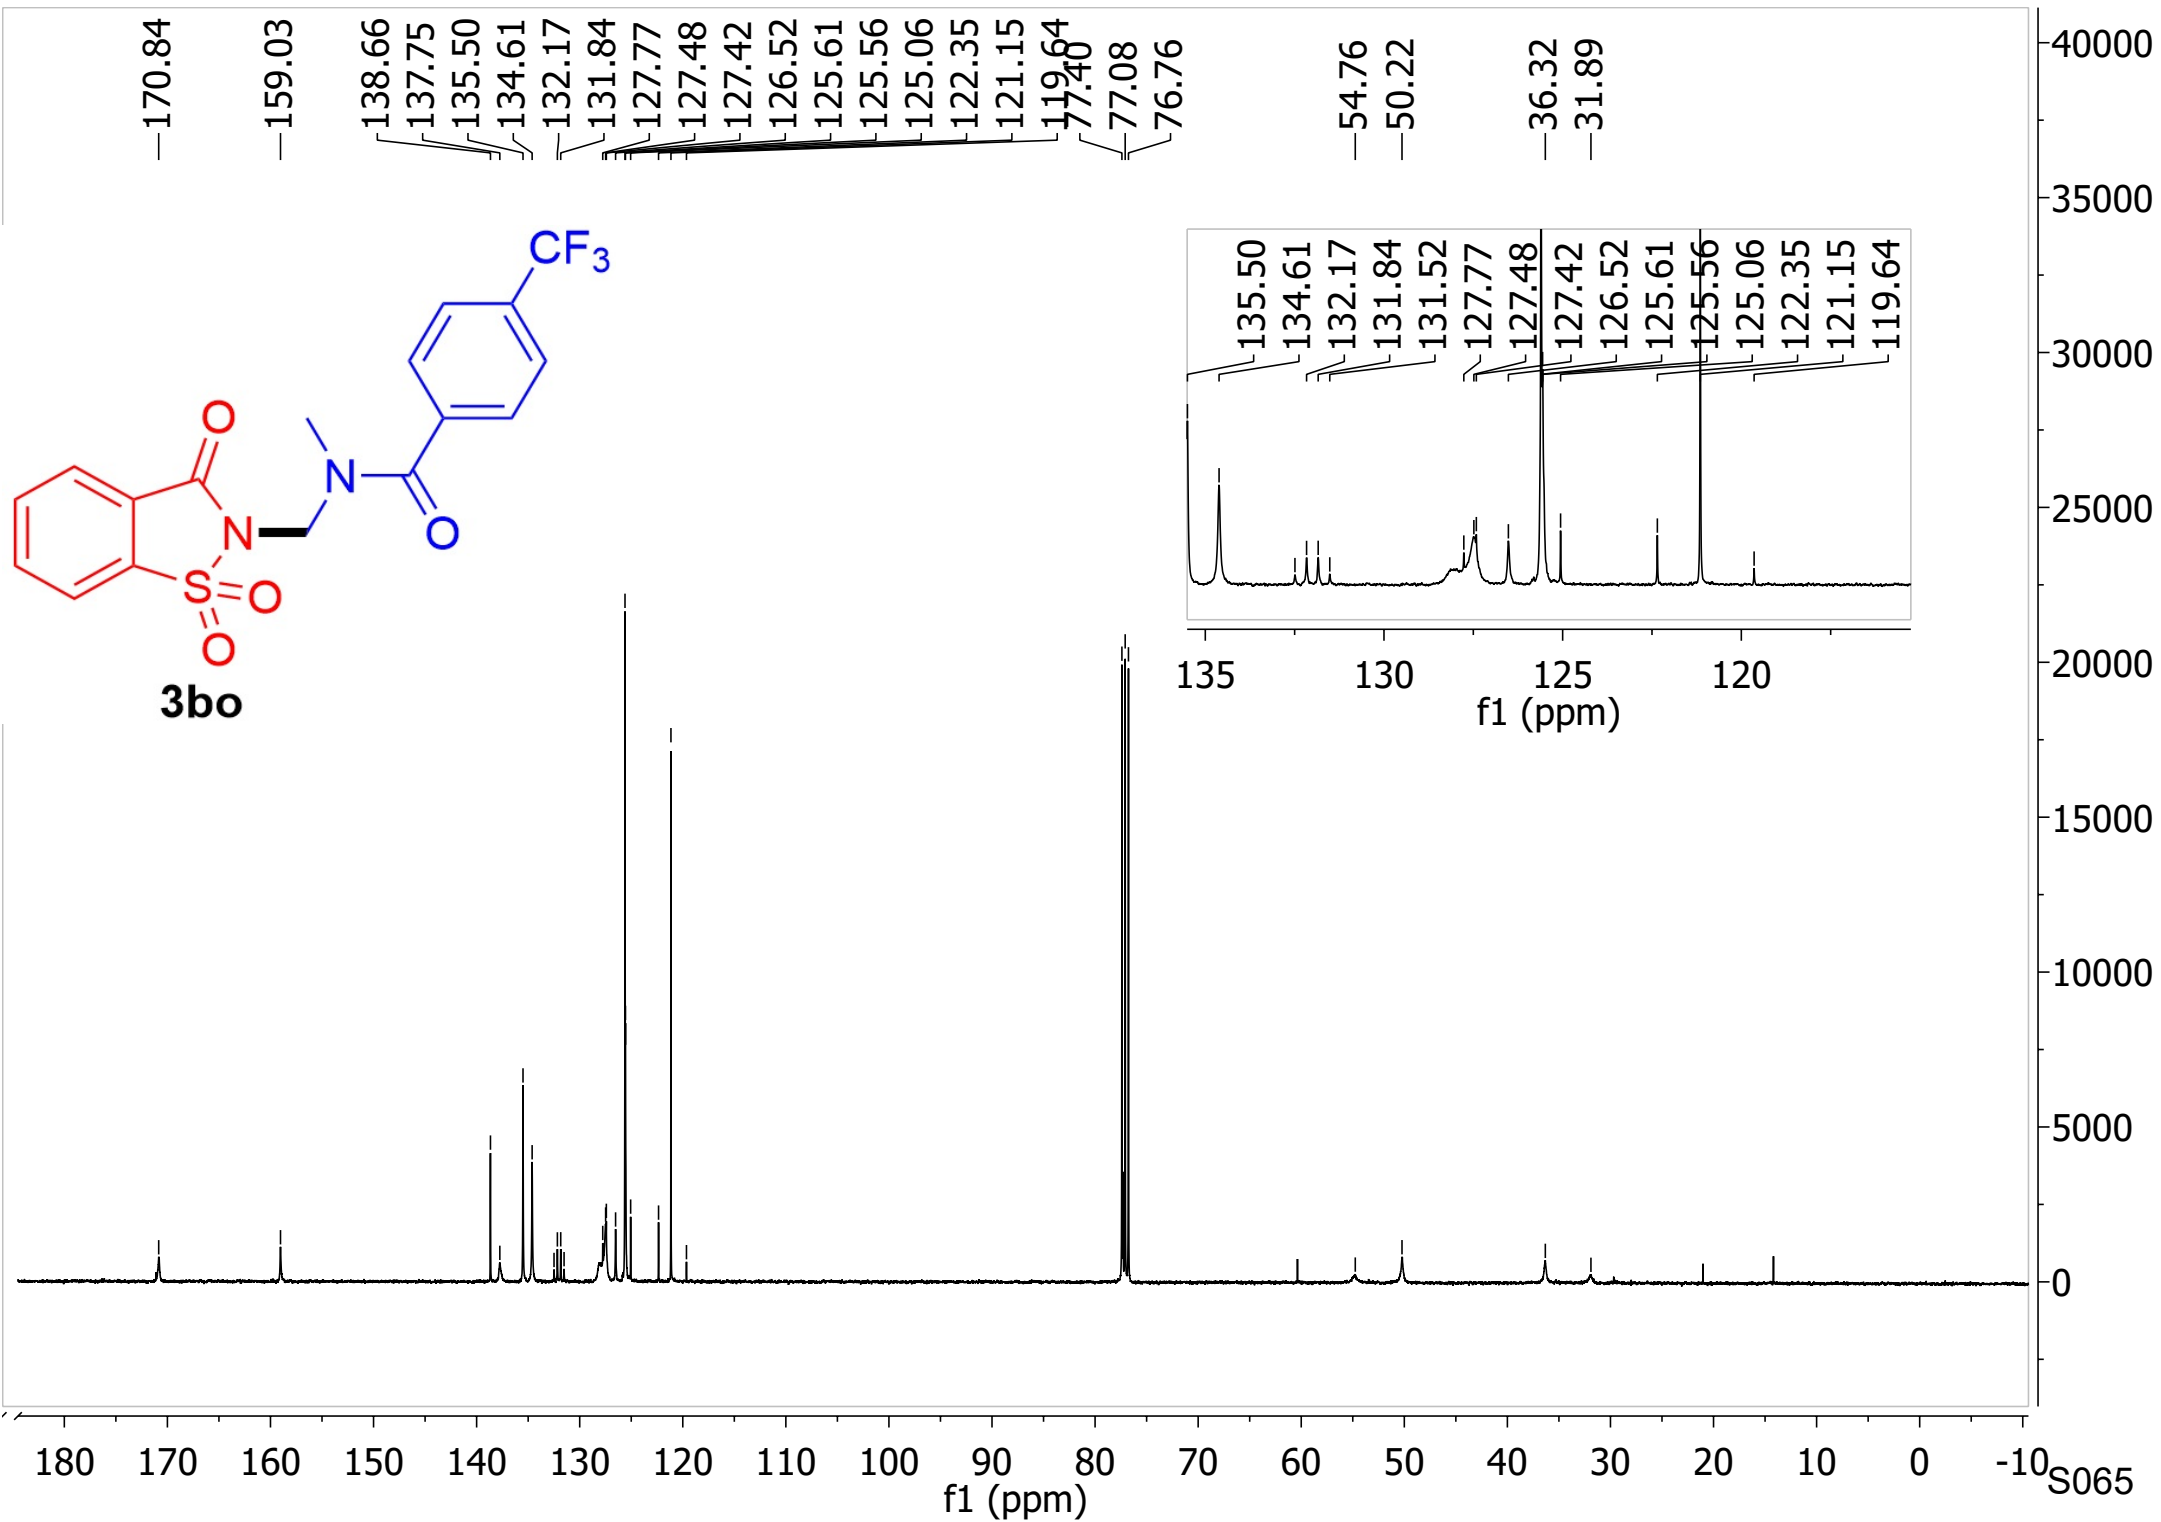

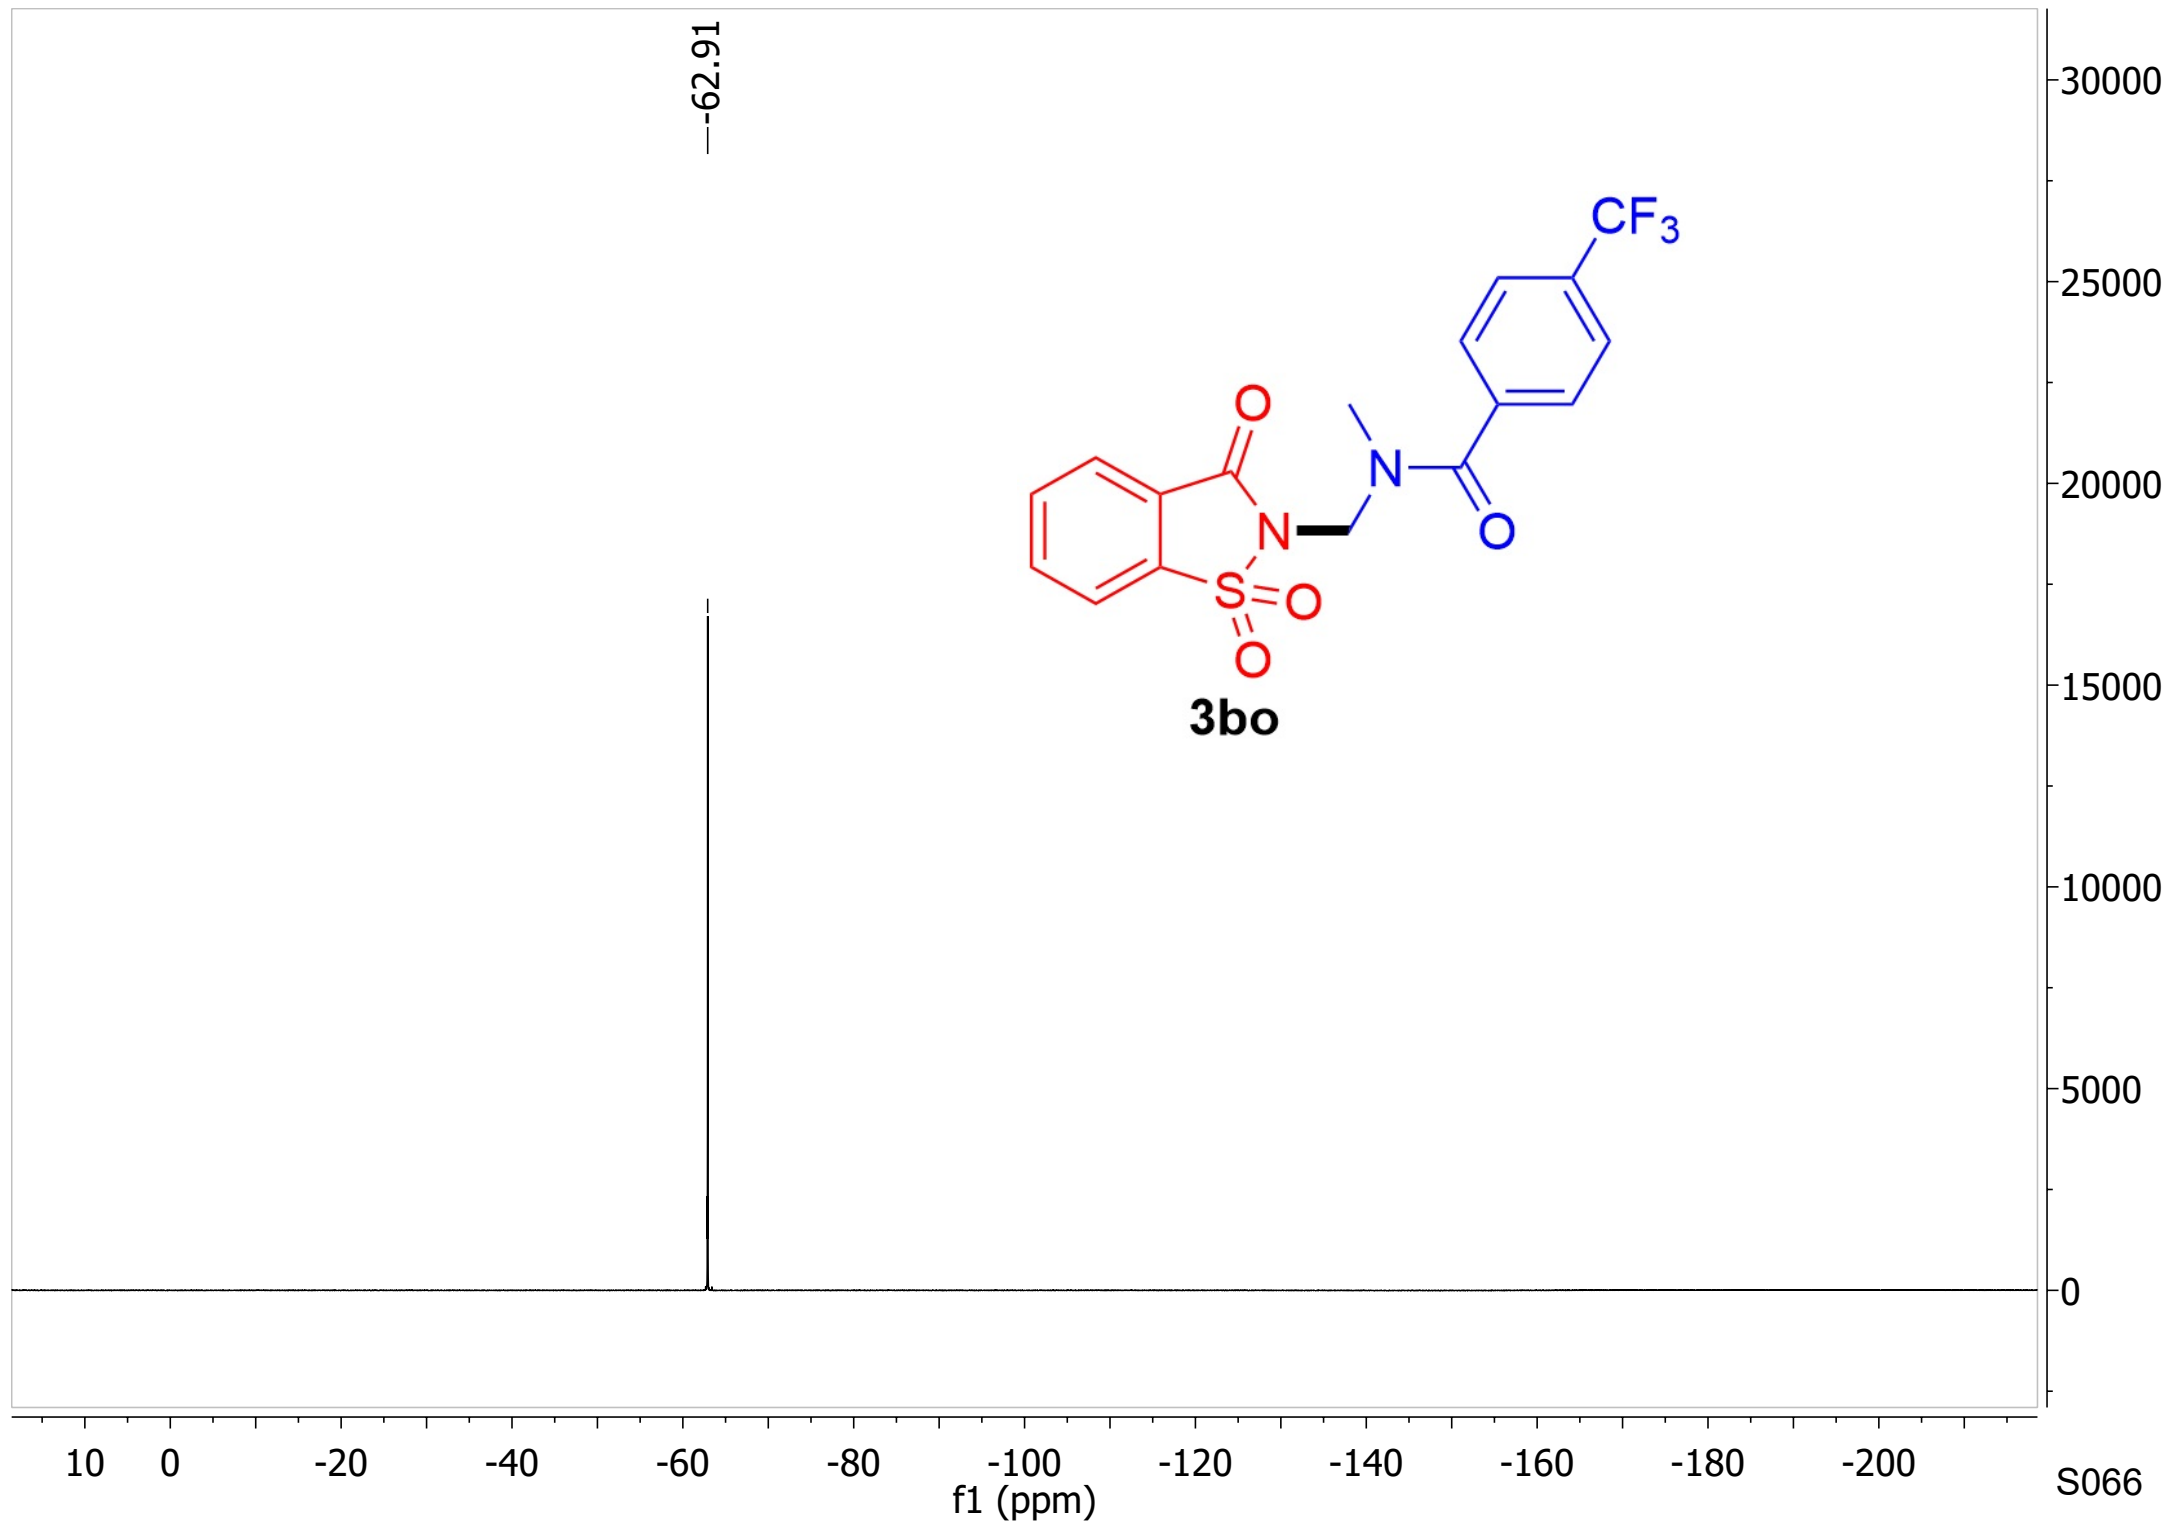

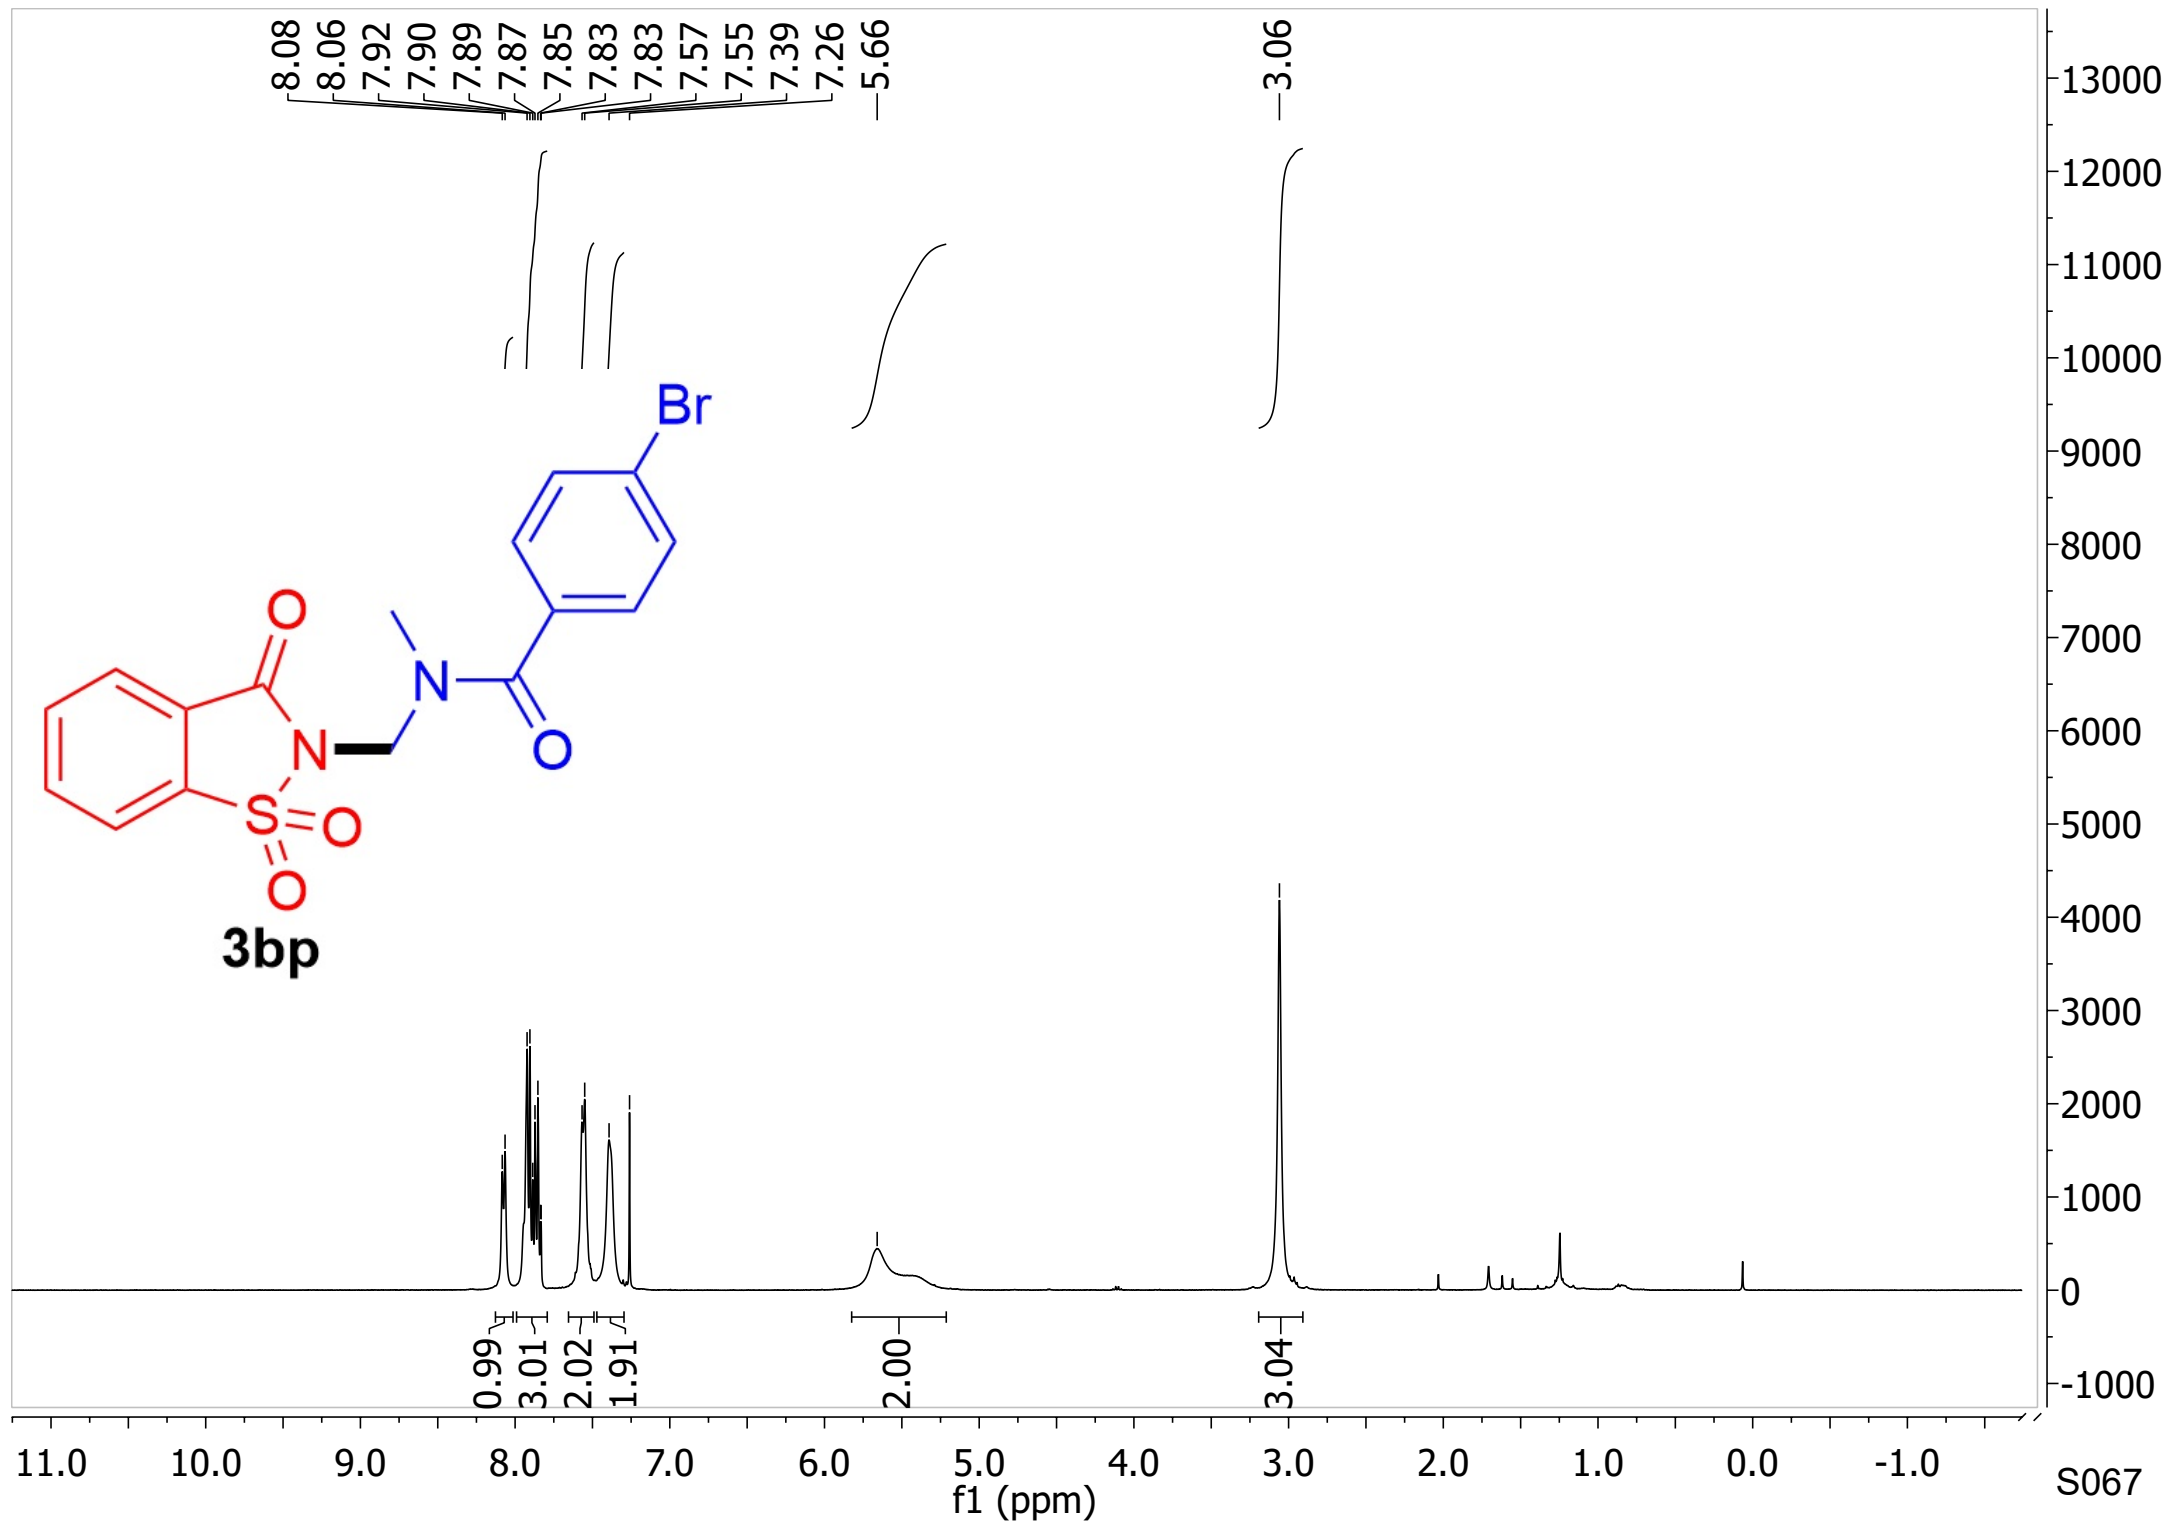



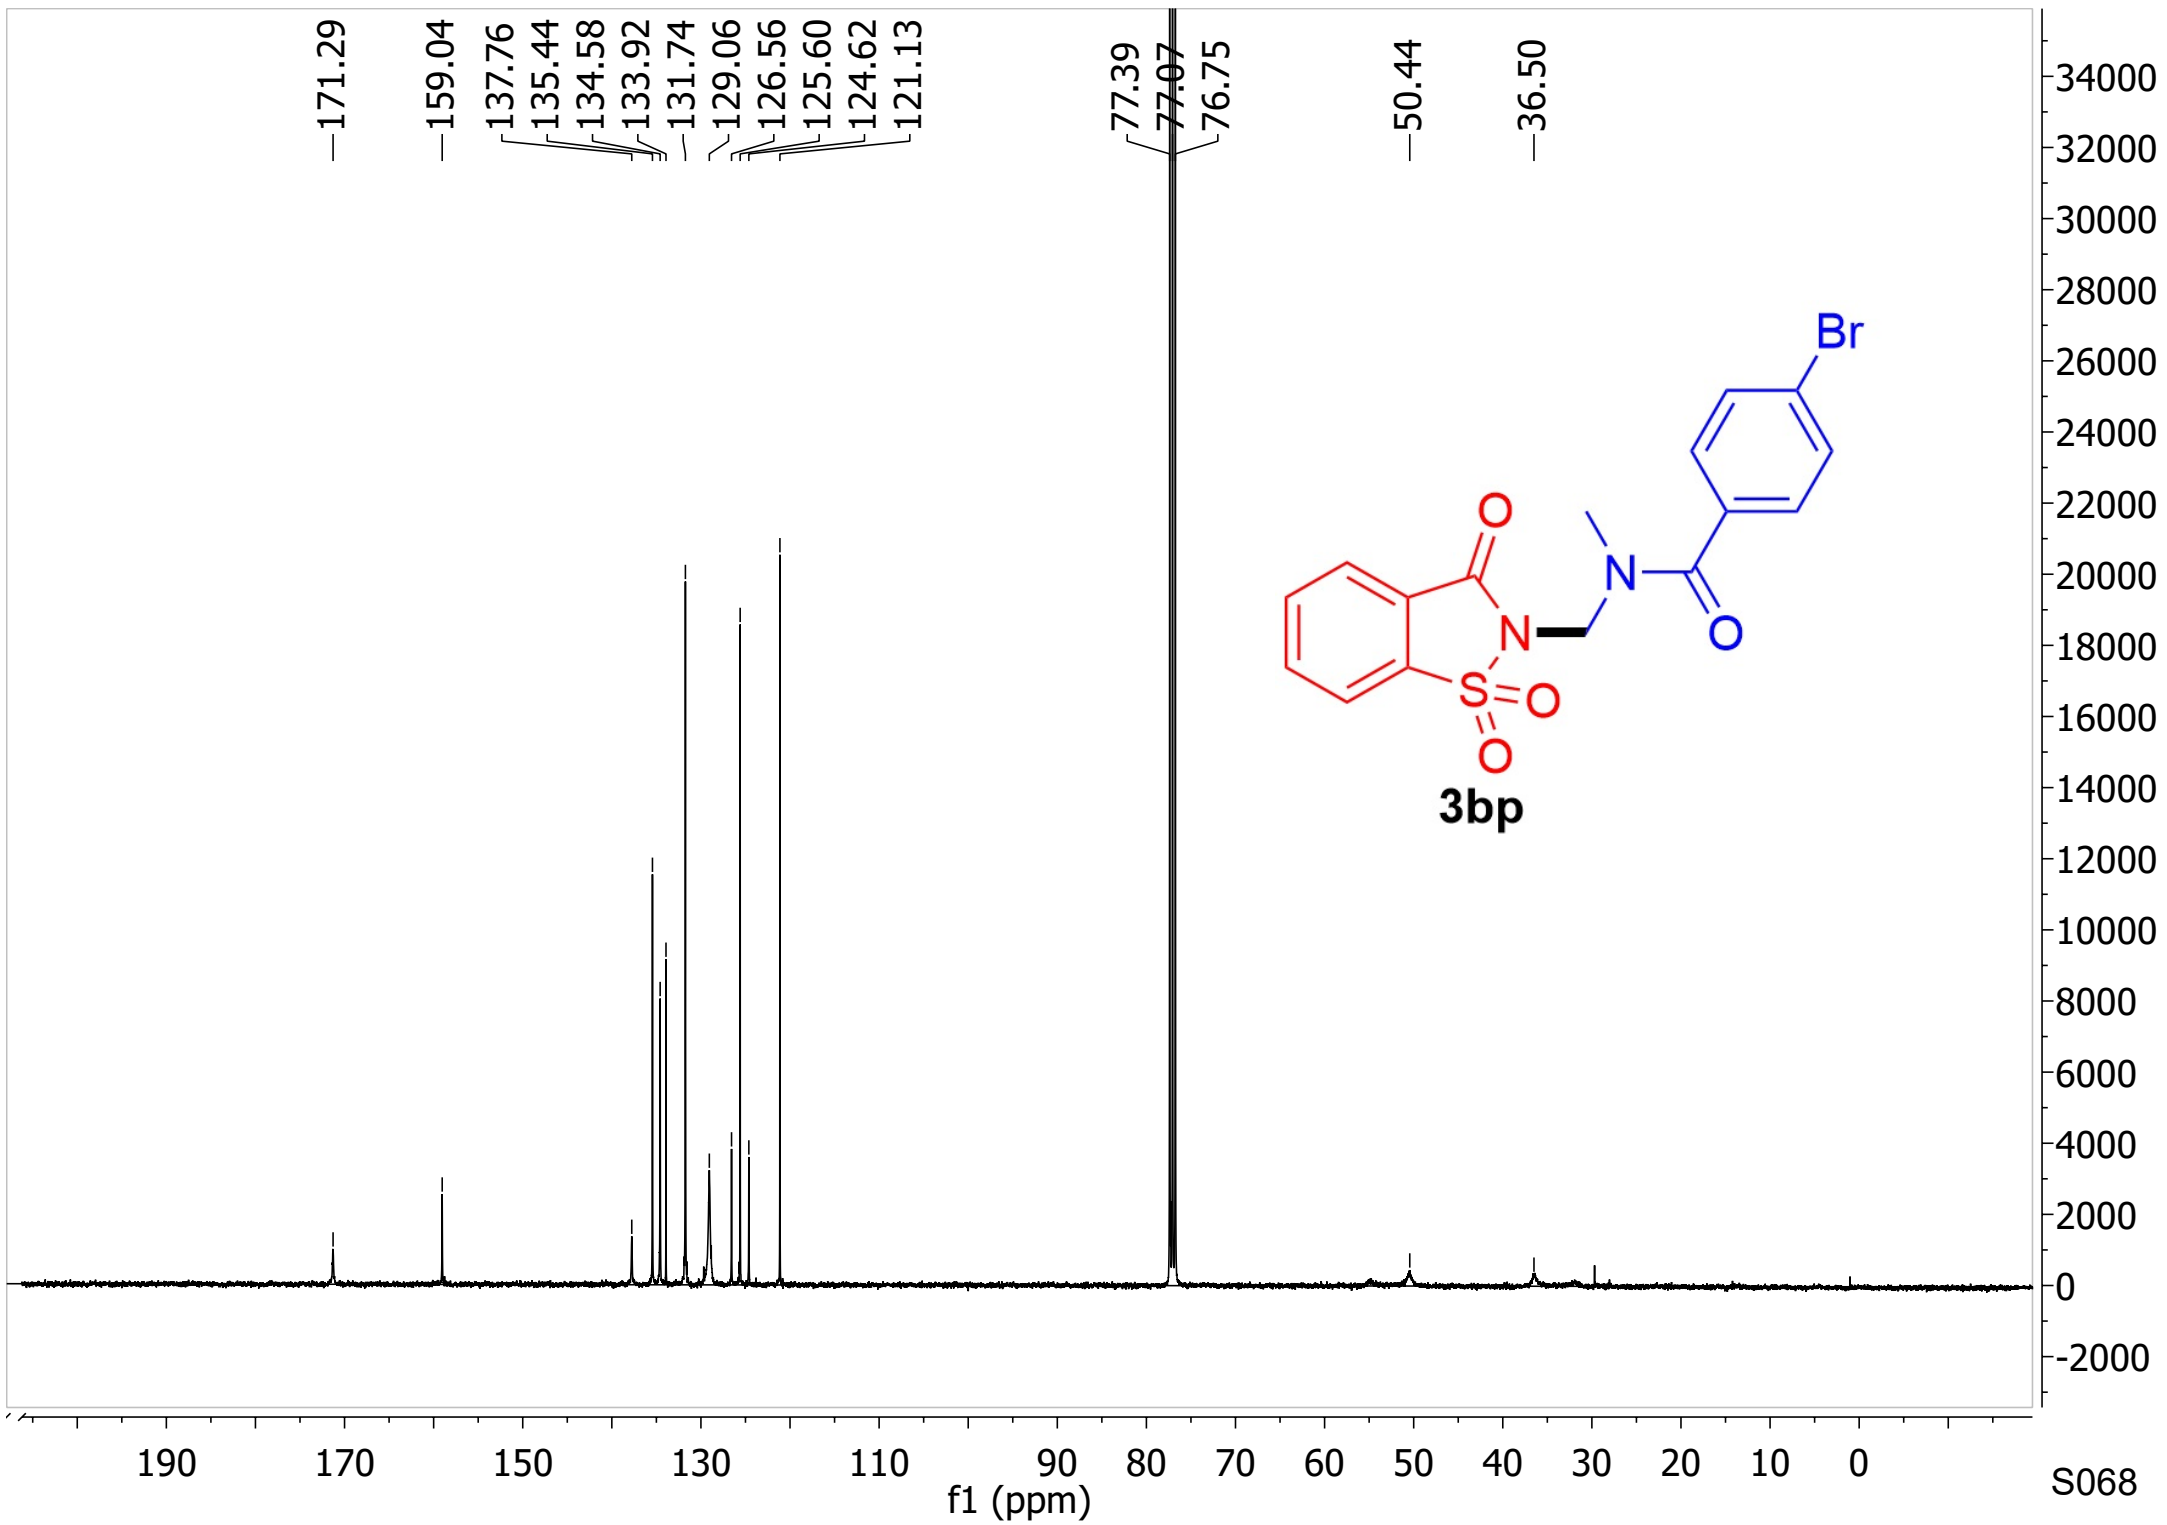

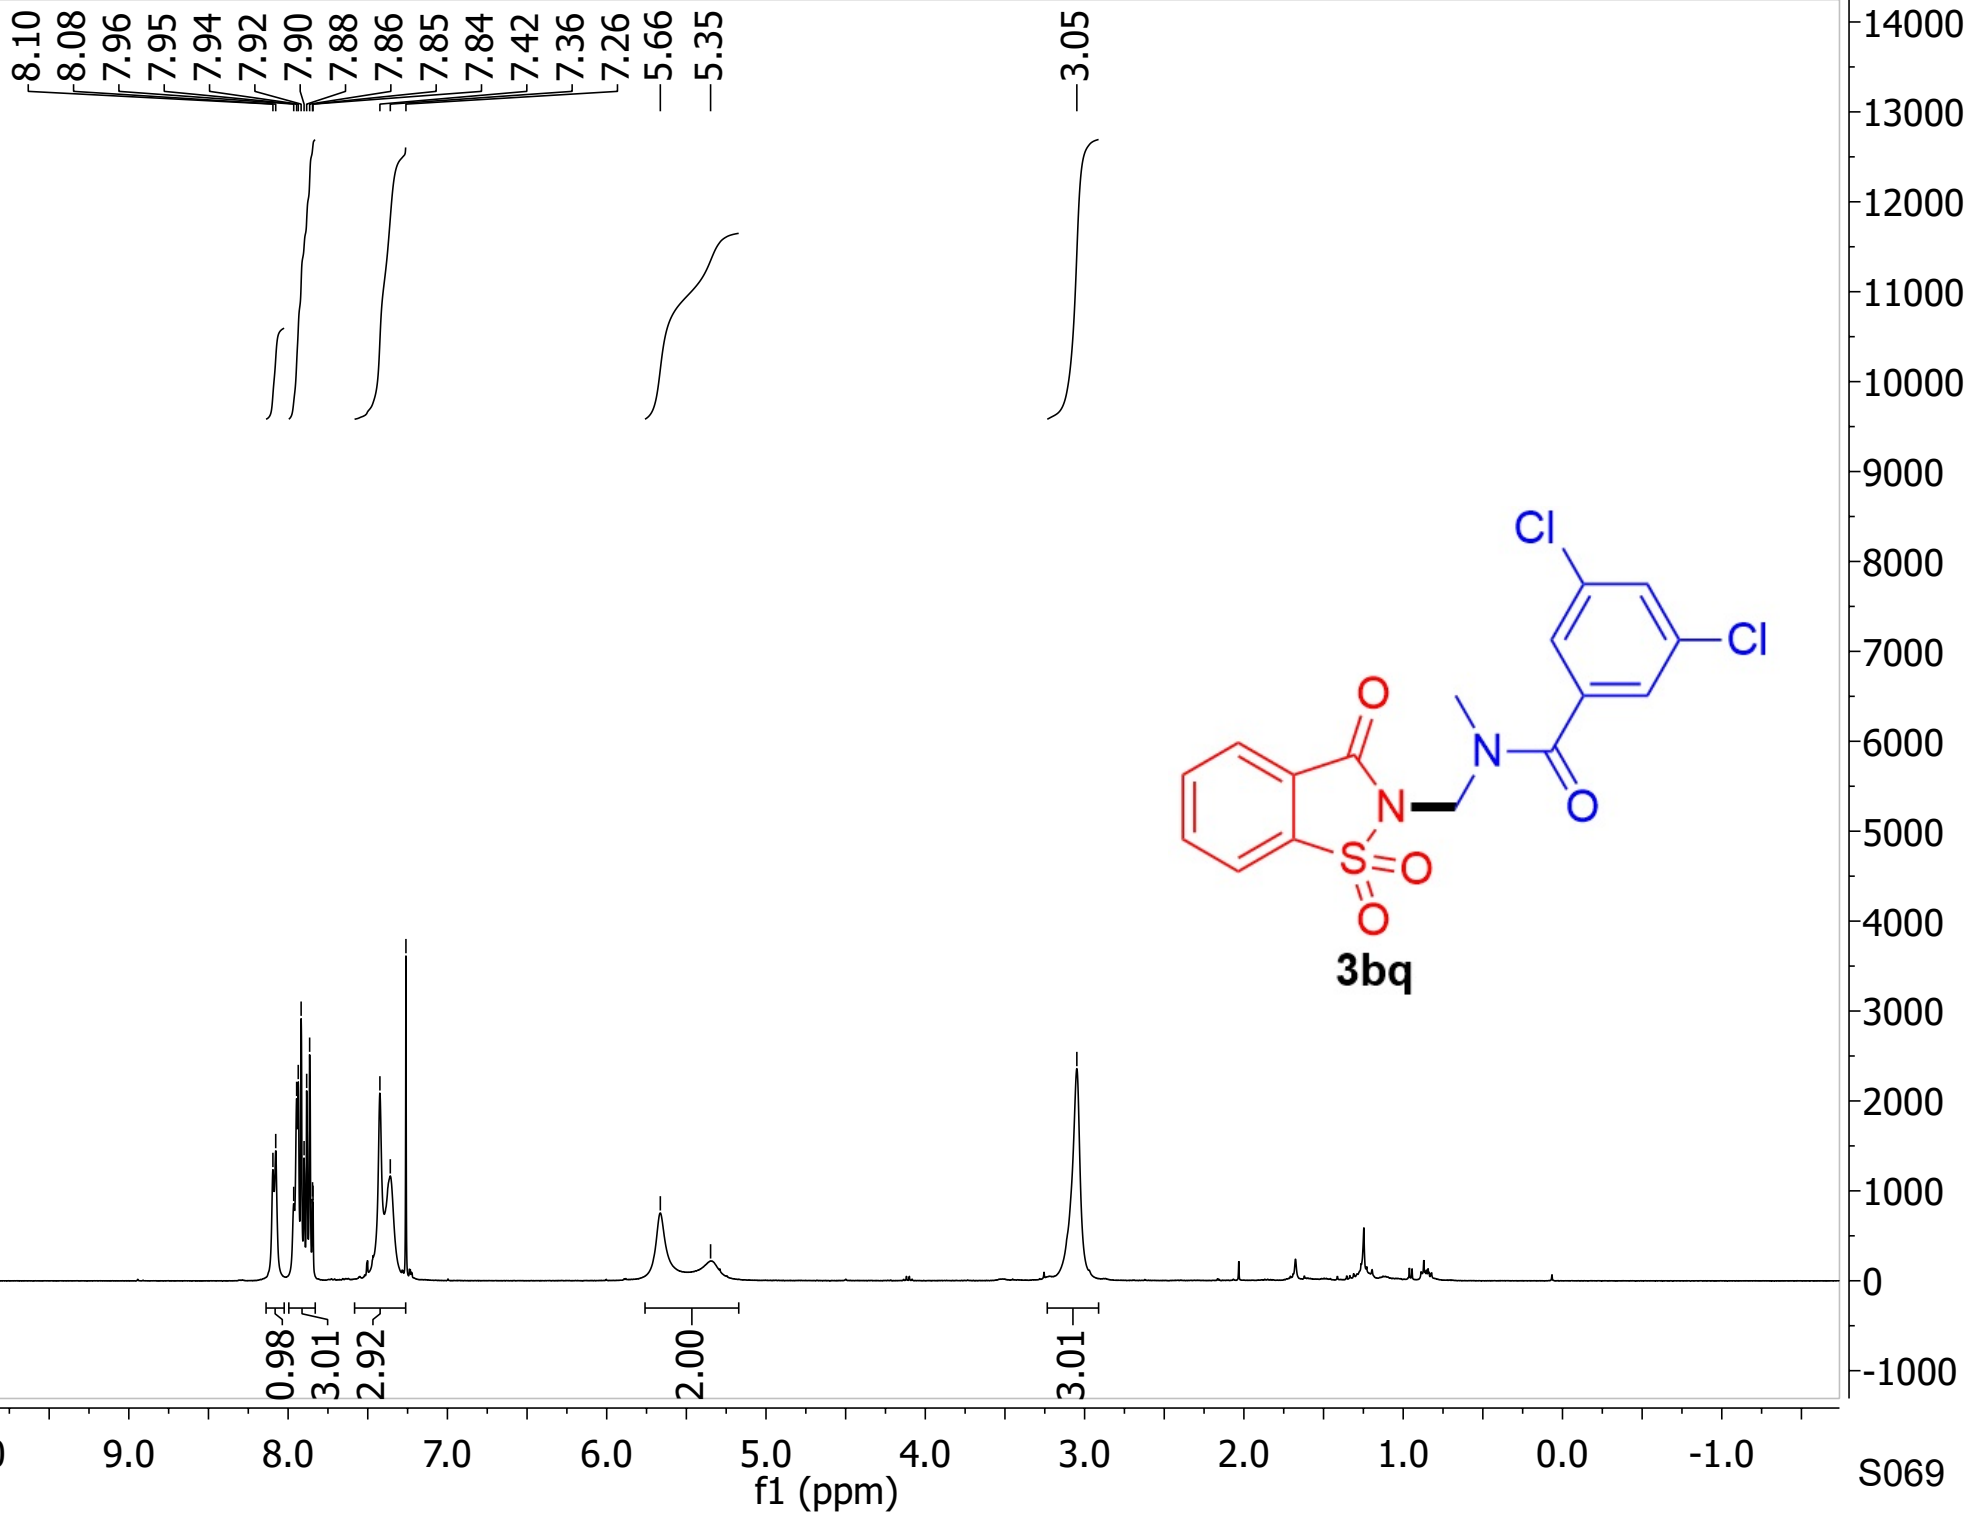

10.0

9.0

8.0

7.0

6.0

5.0

4.0

3.0

2.0

1.0

0.0

-1.0

f1 (ppm)

S069

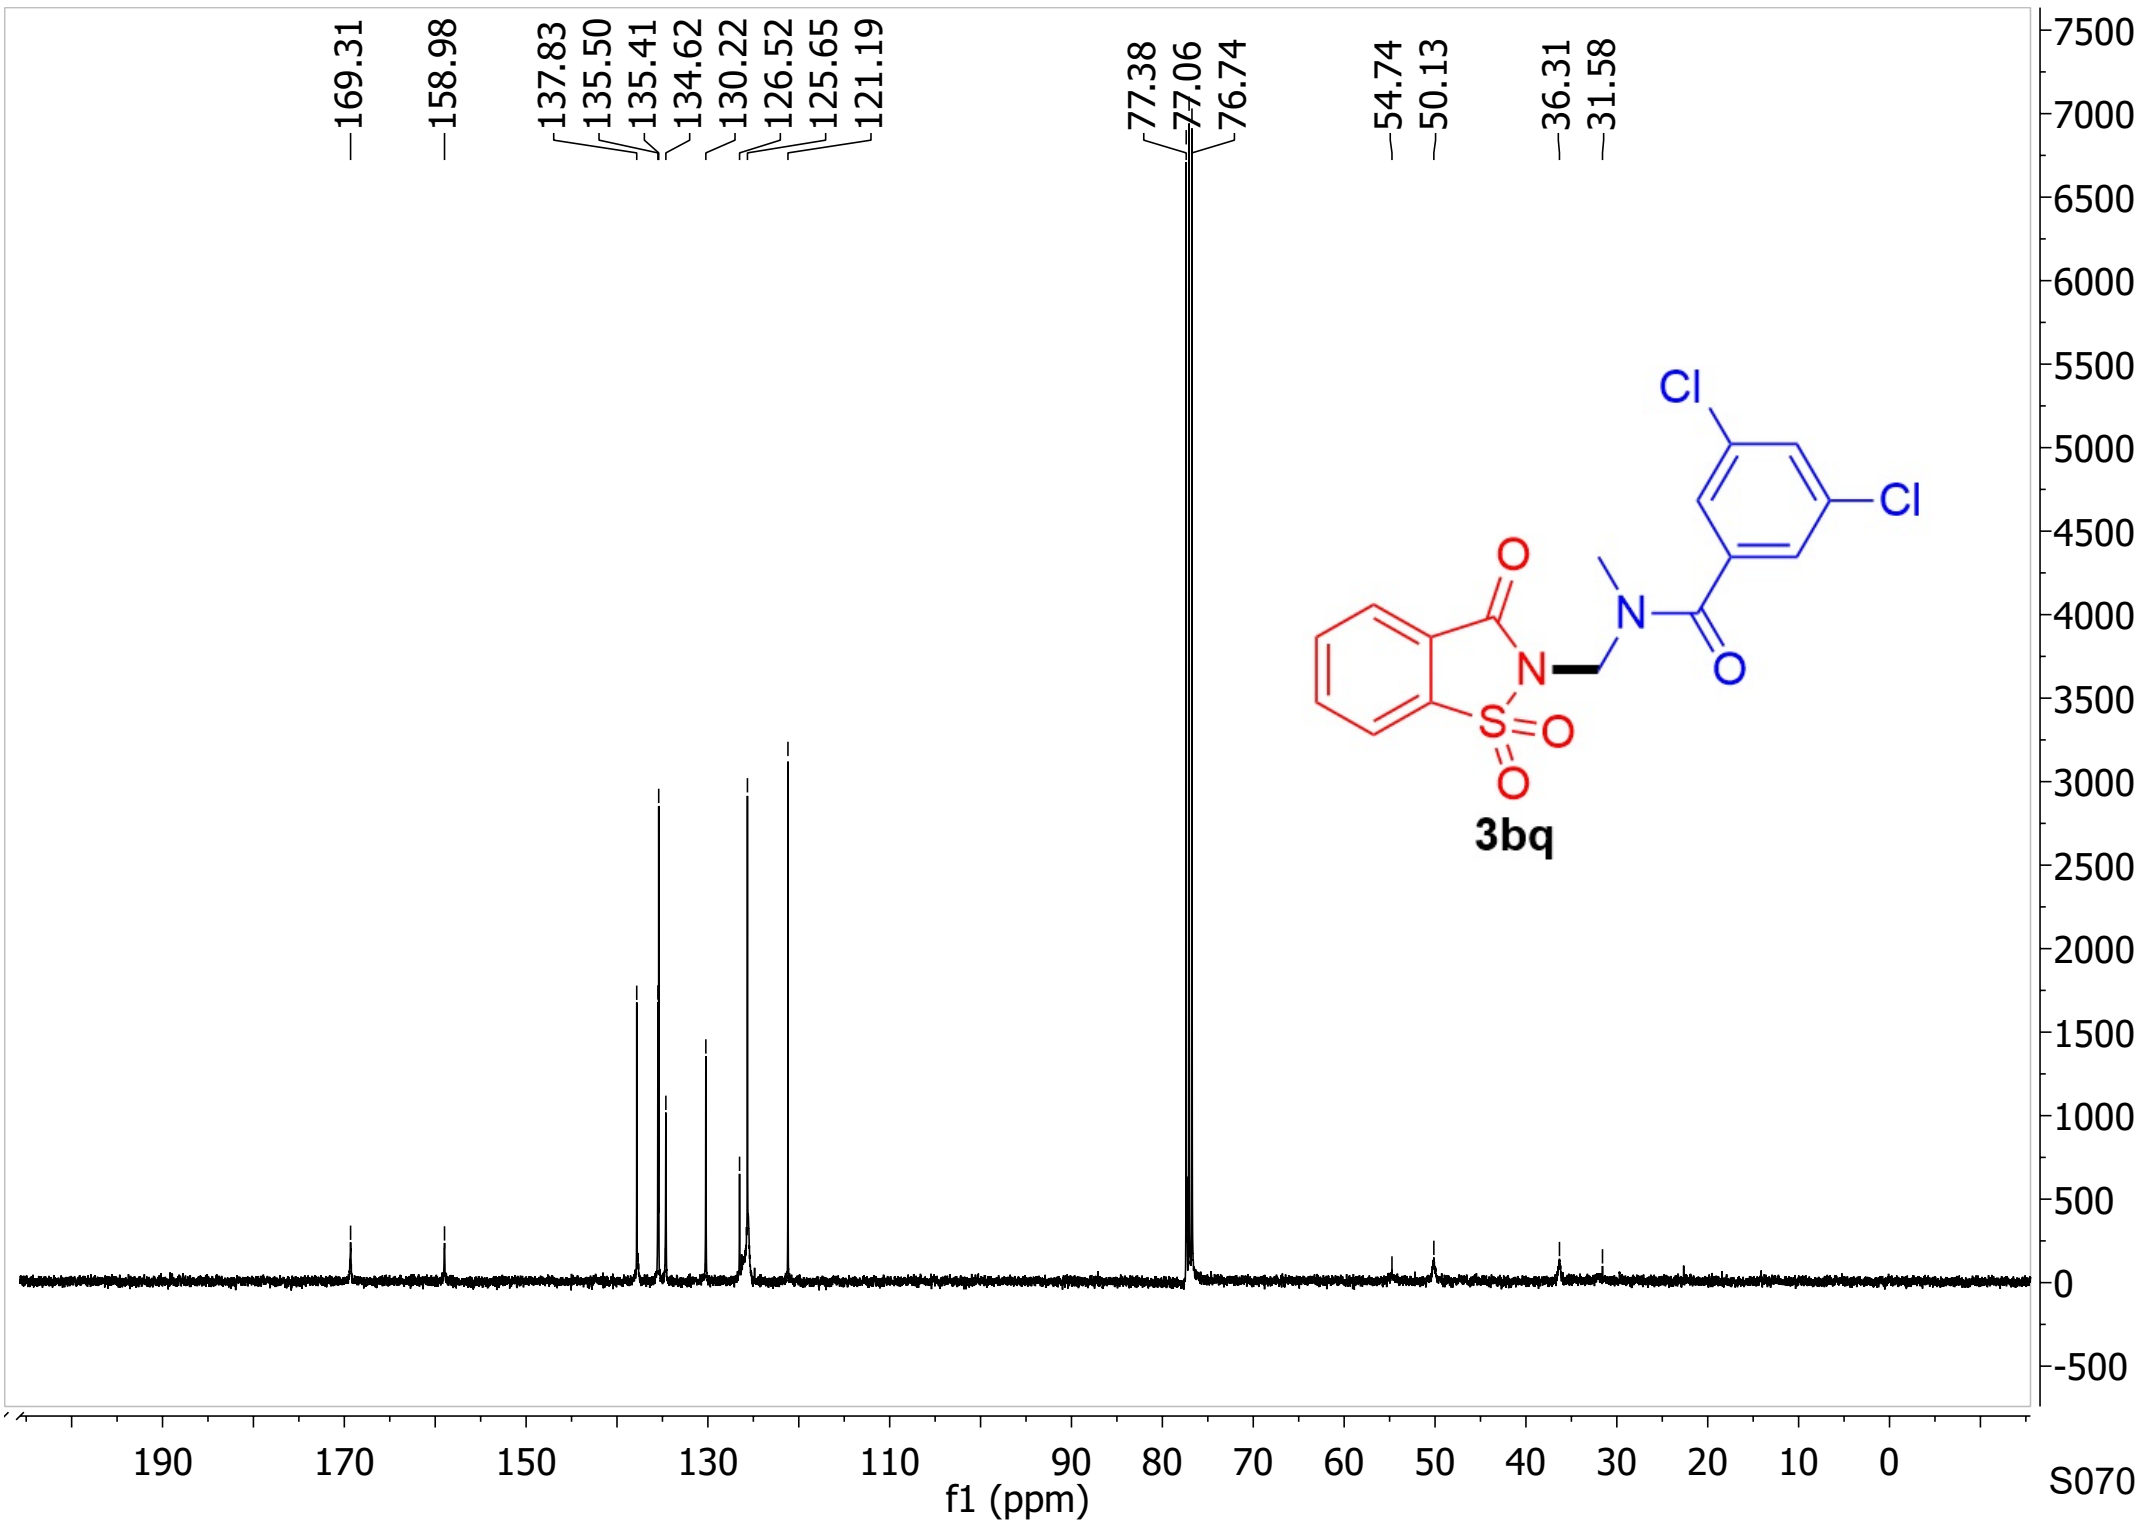

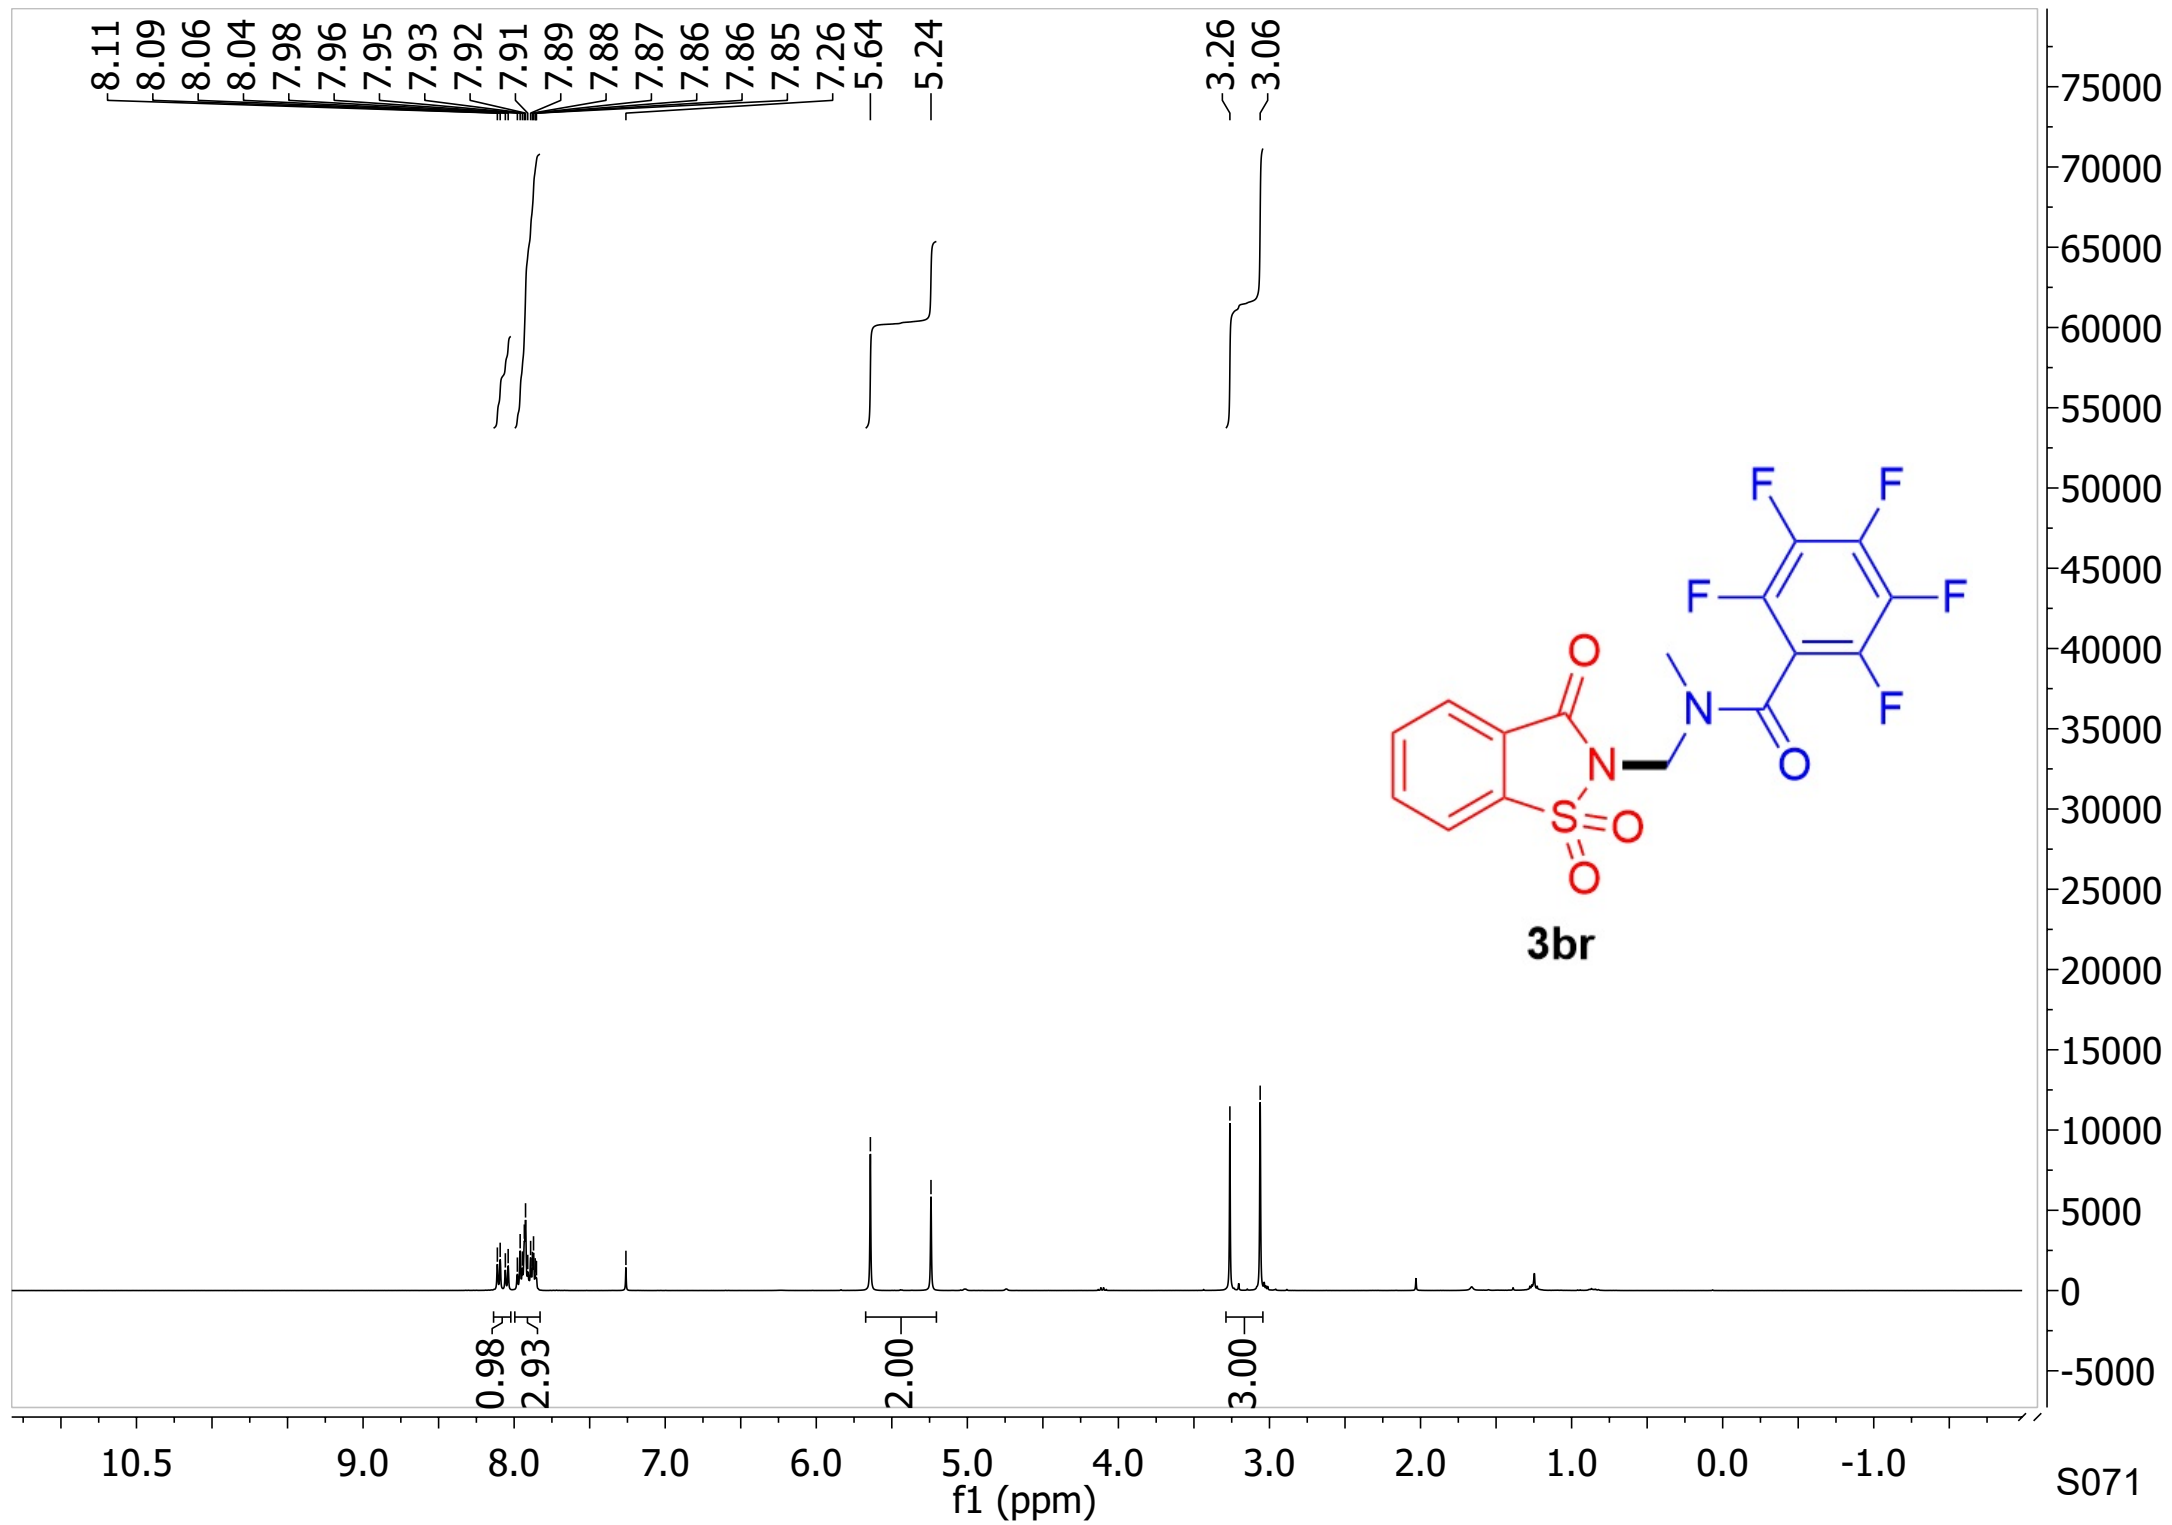

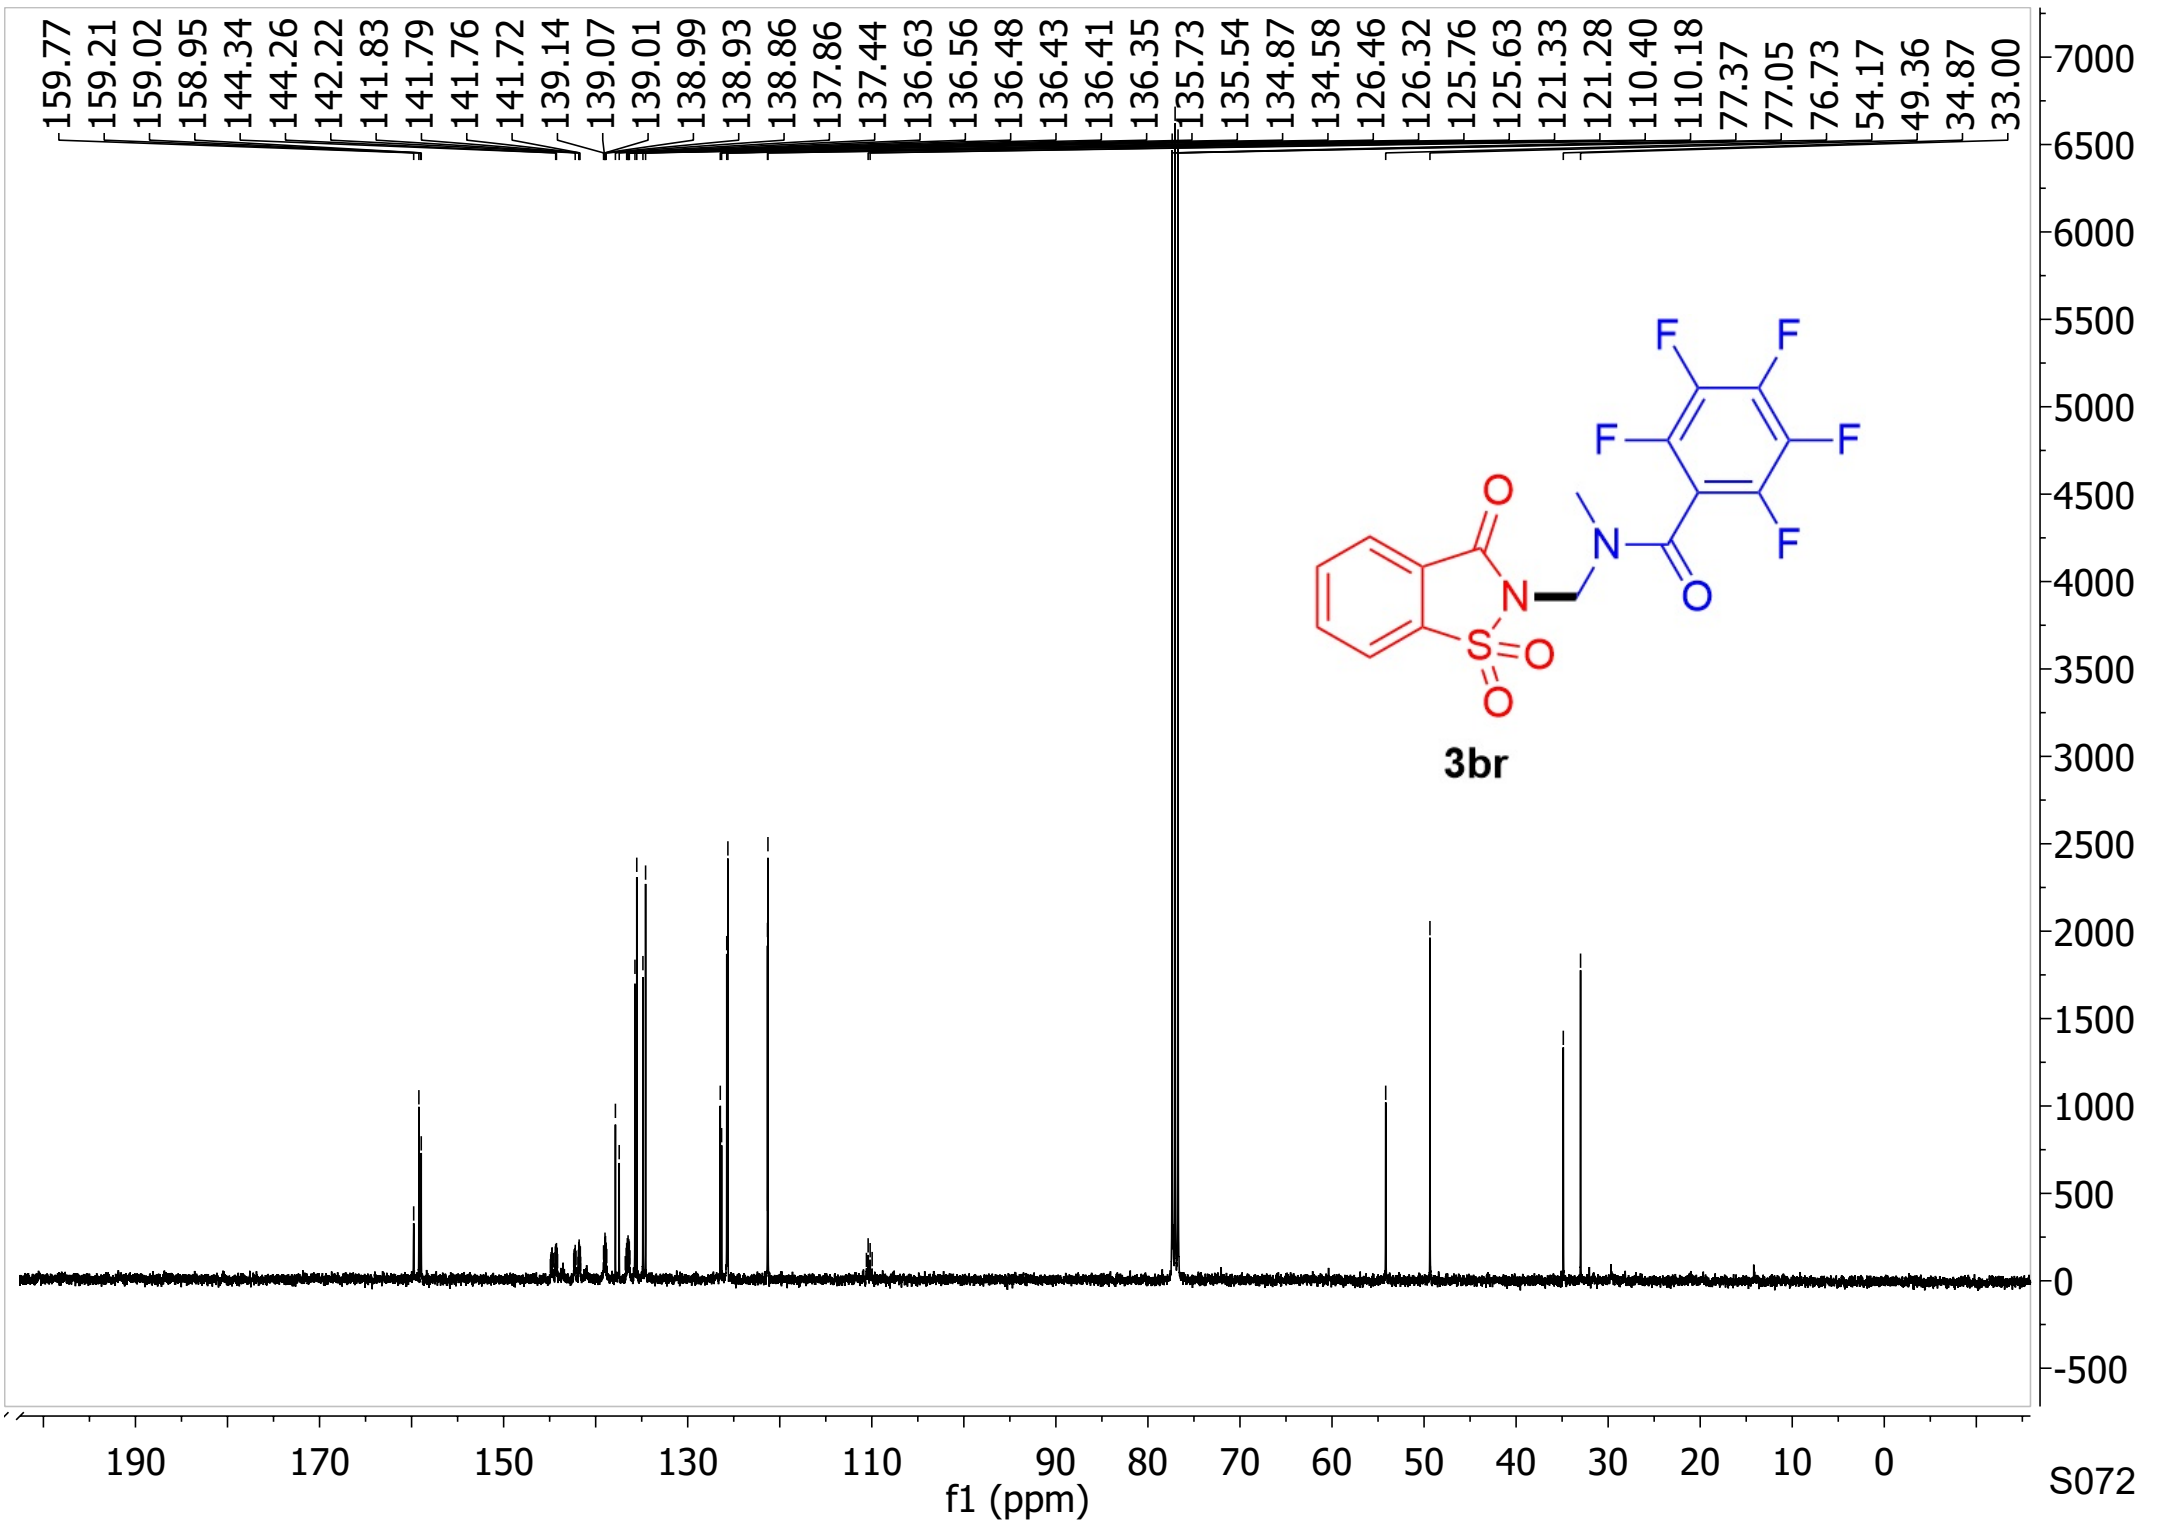

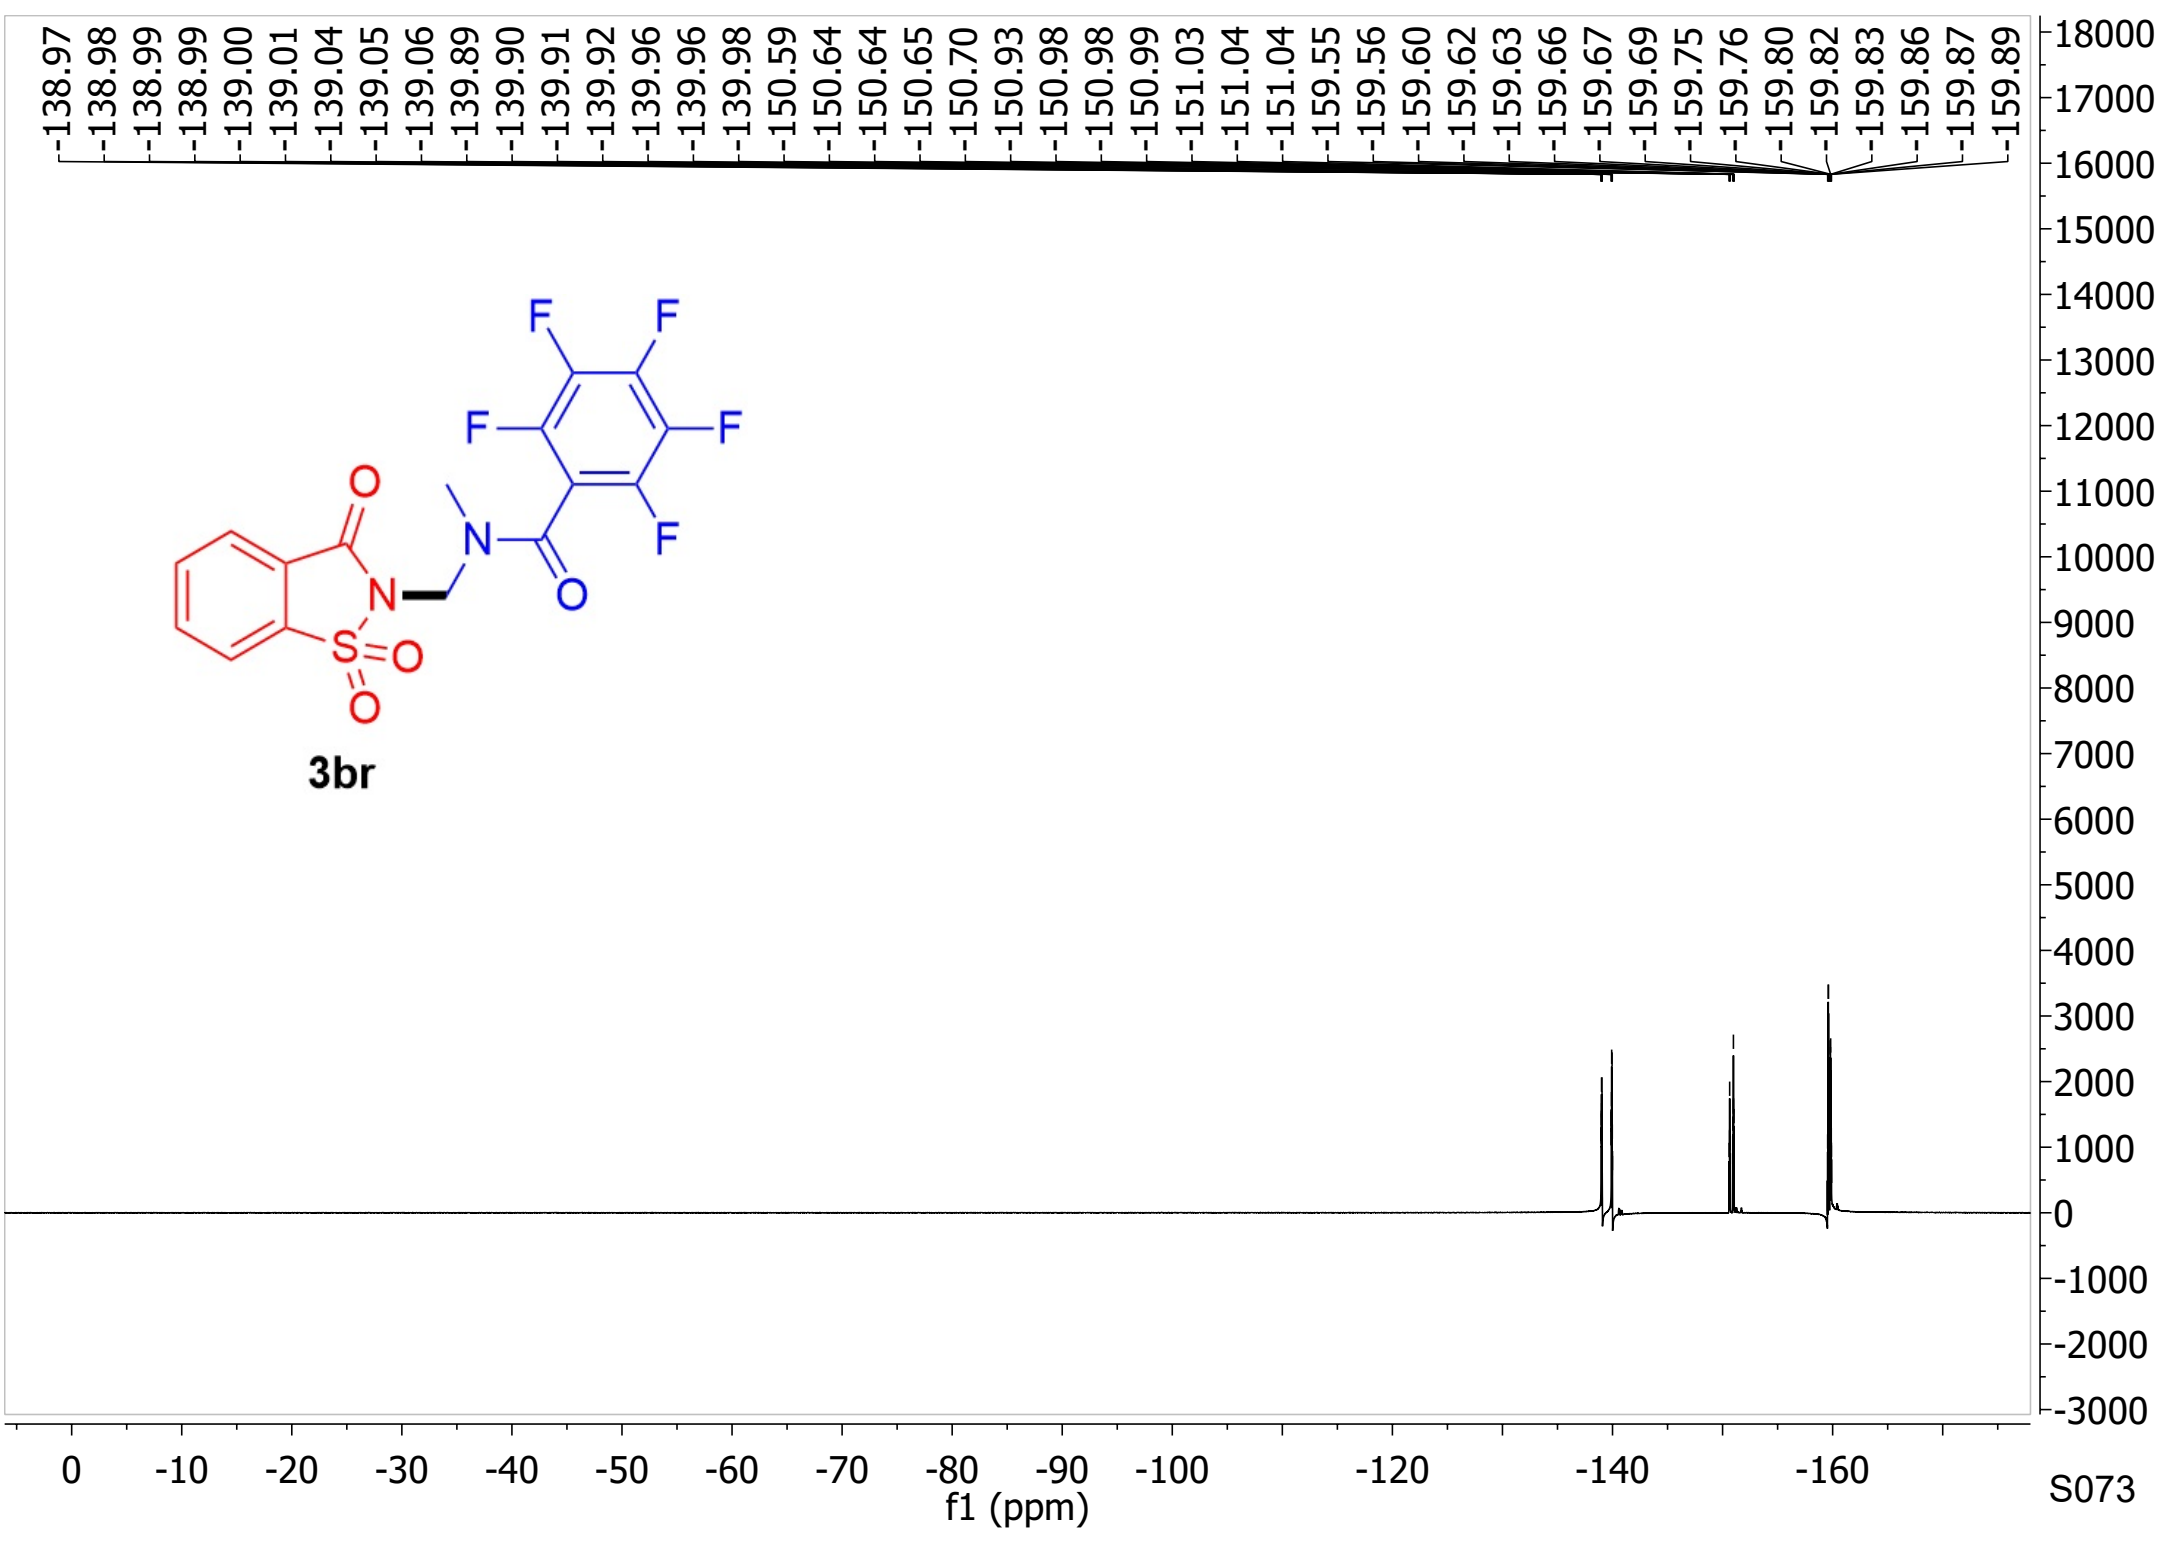

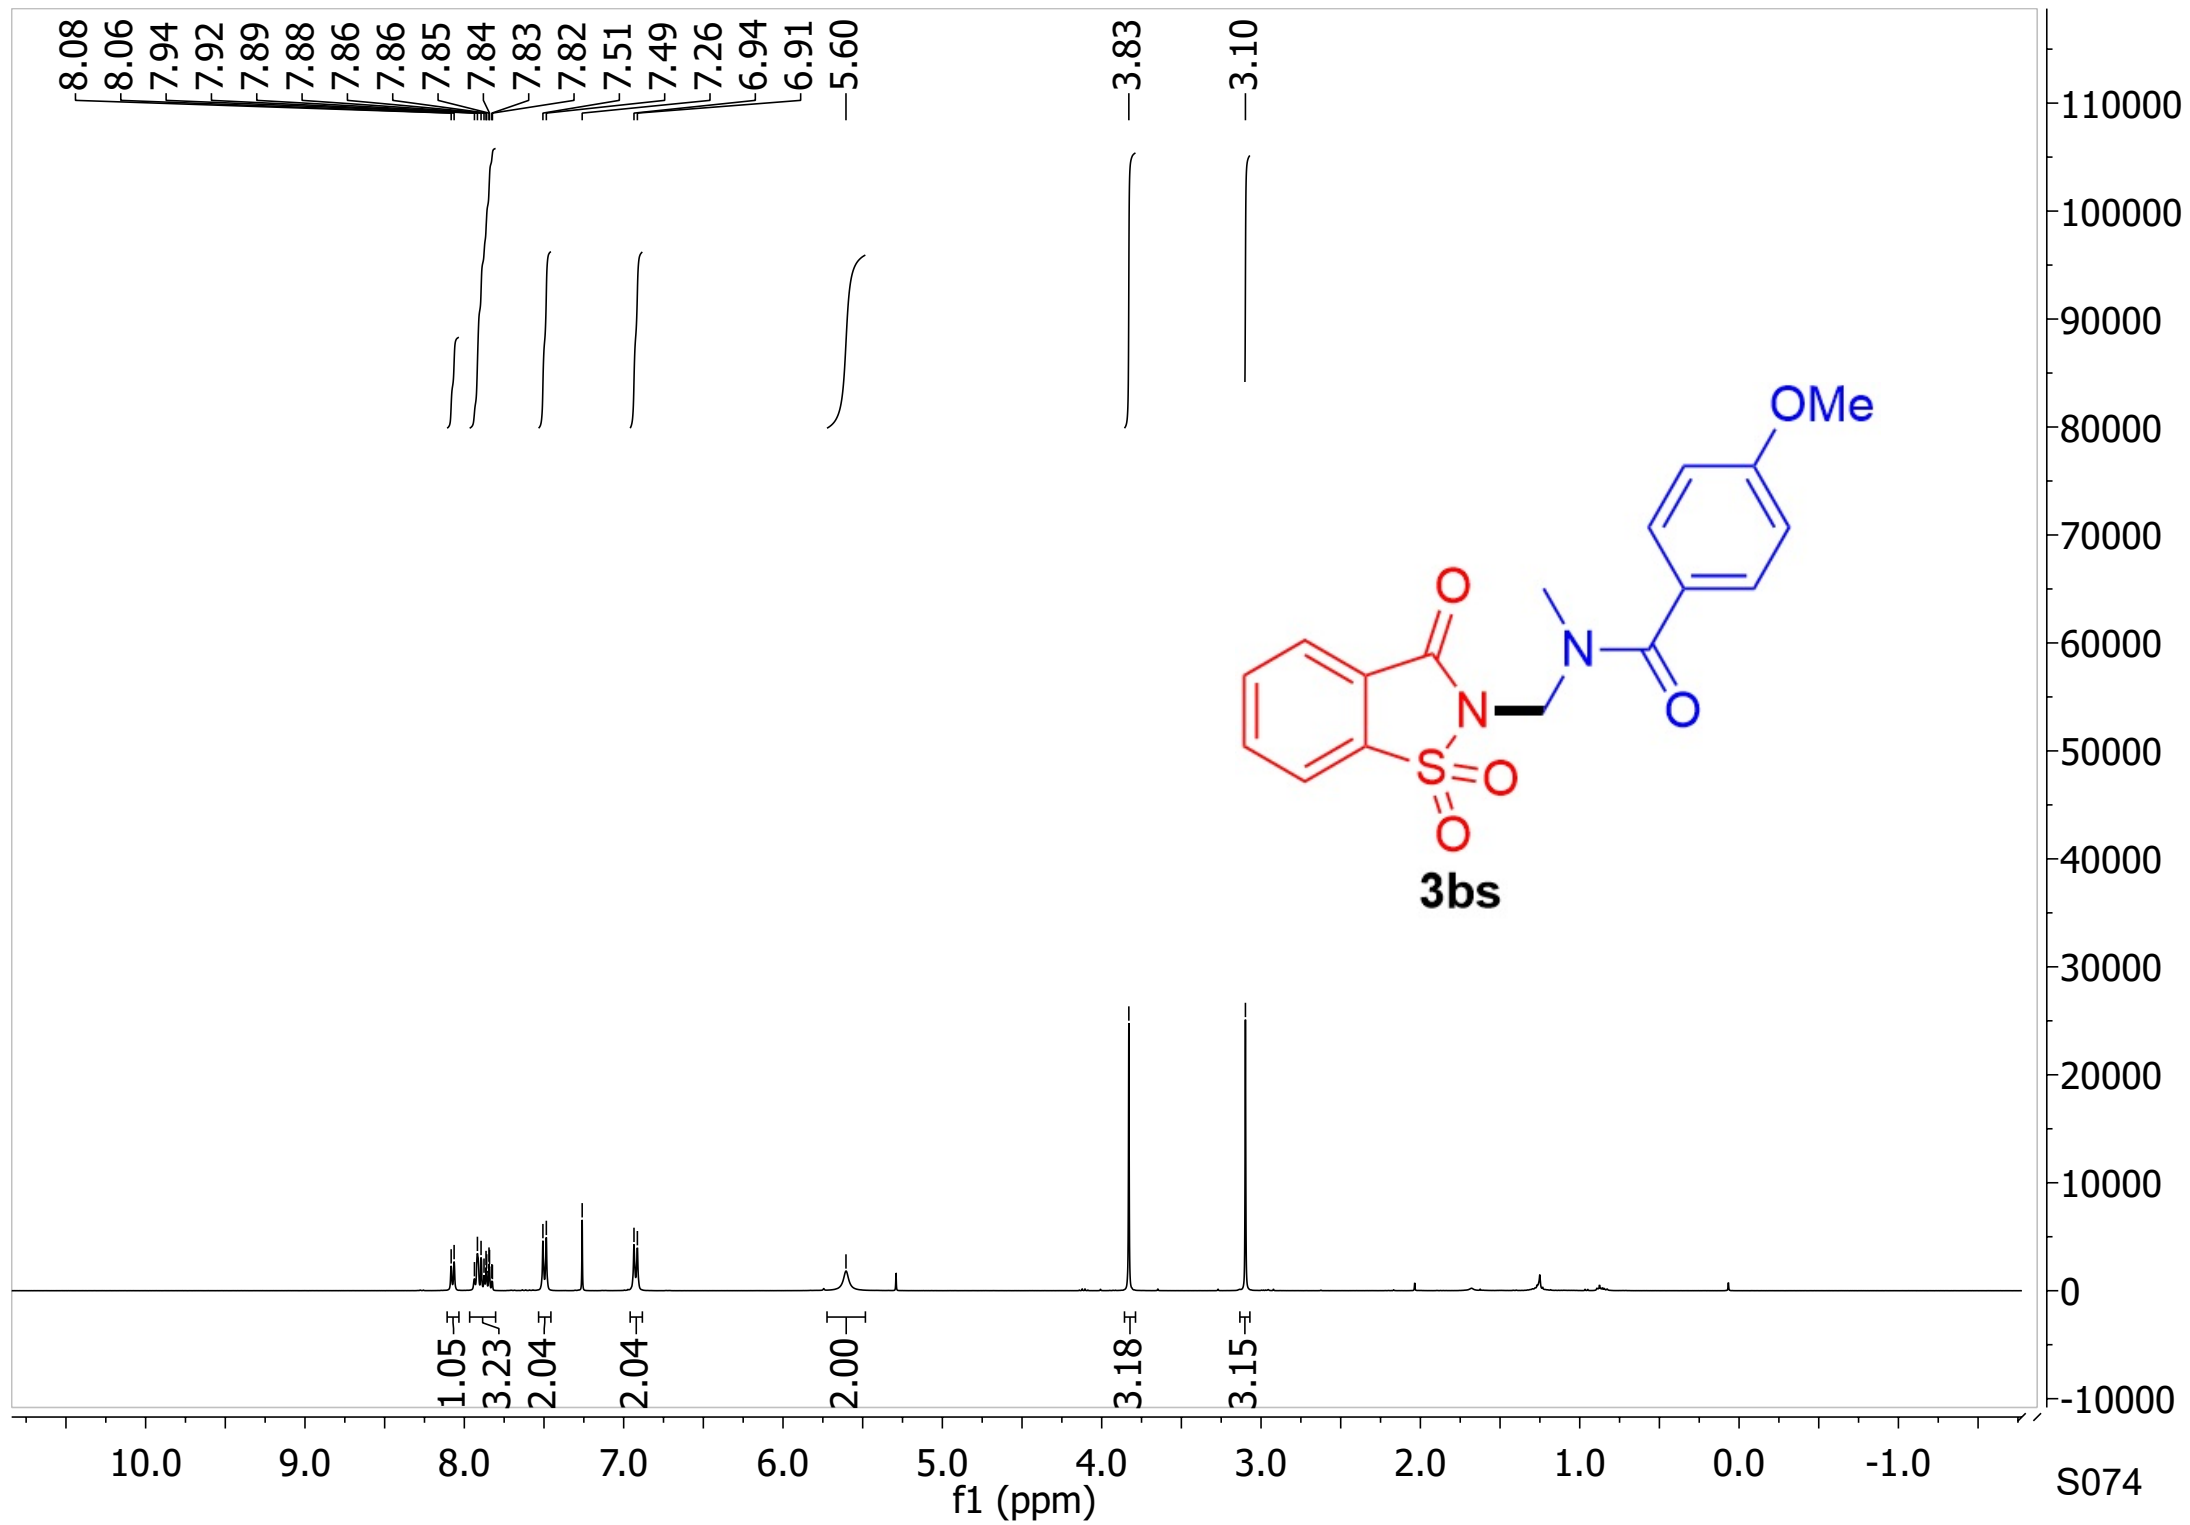

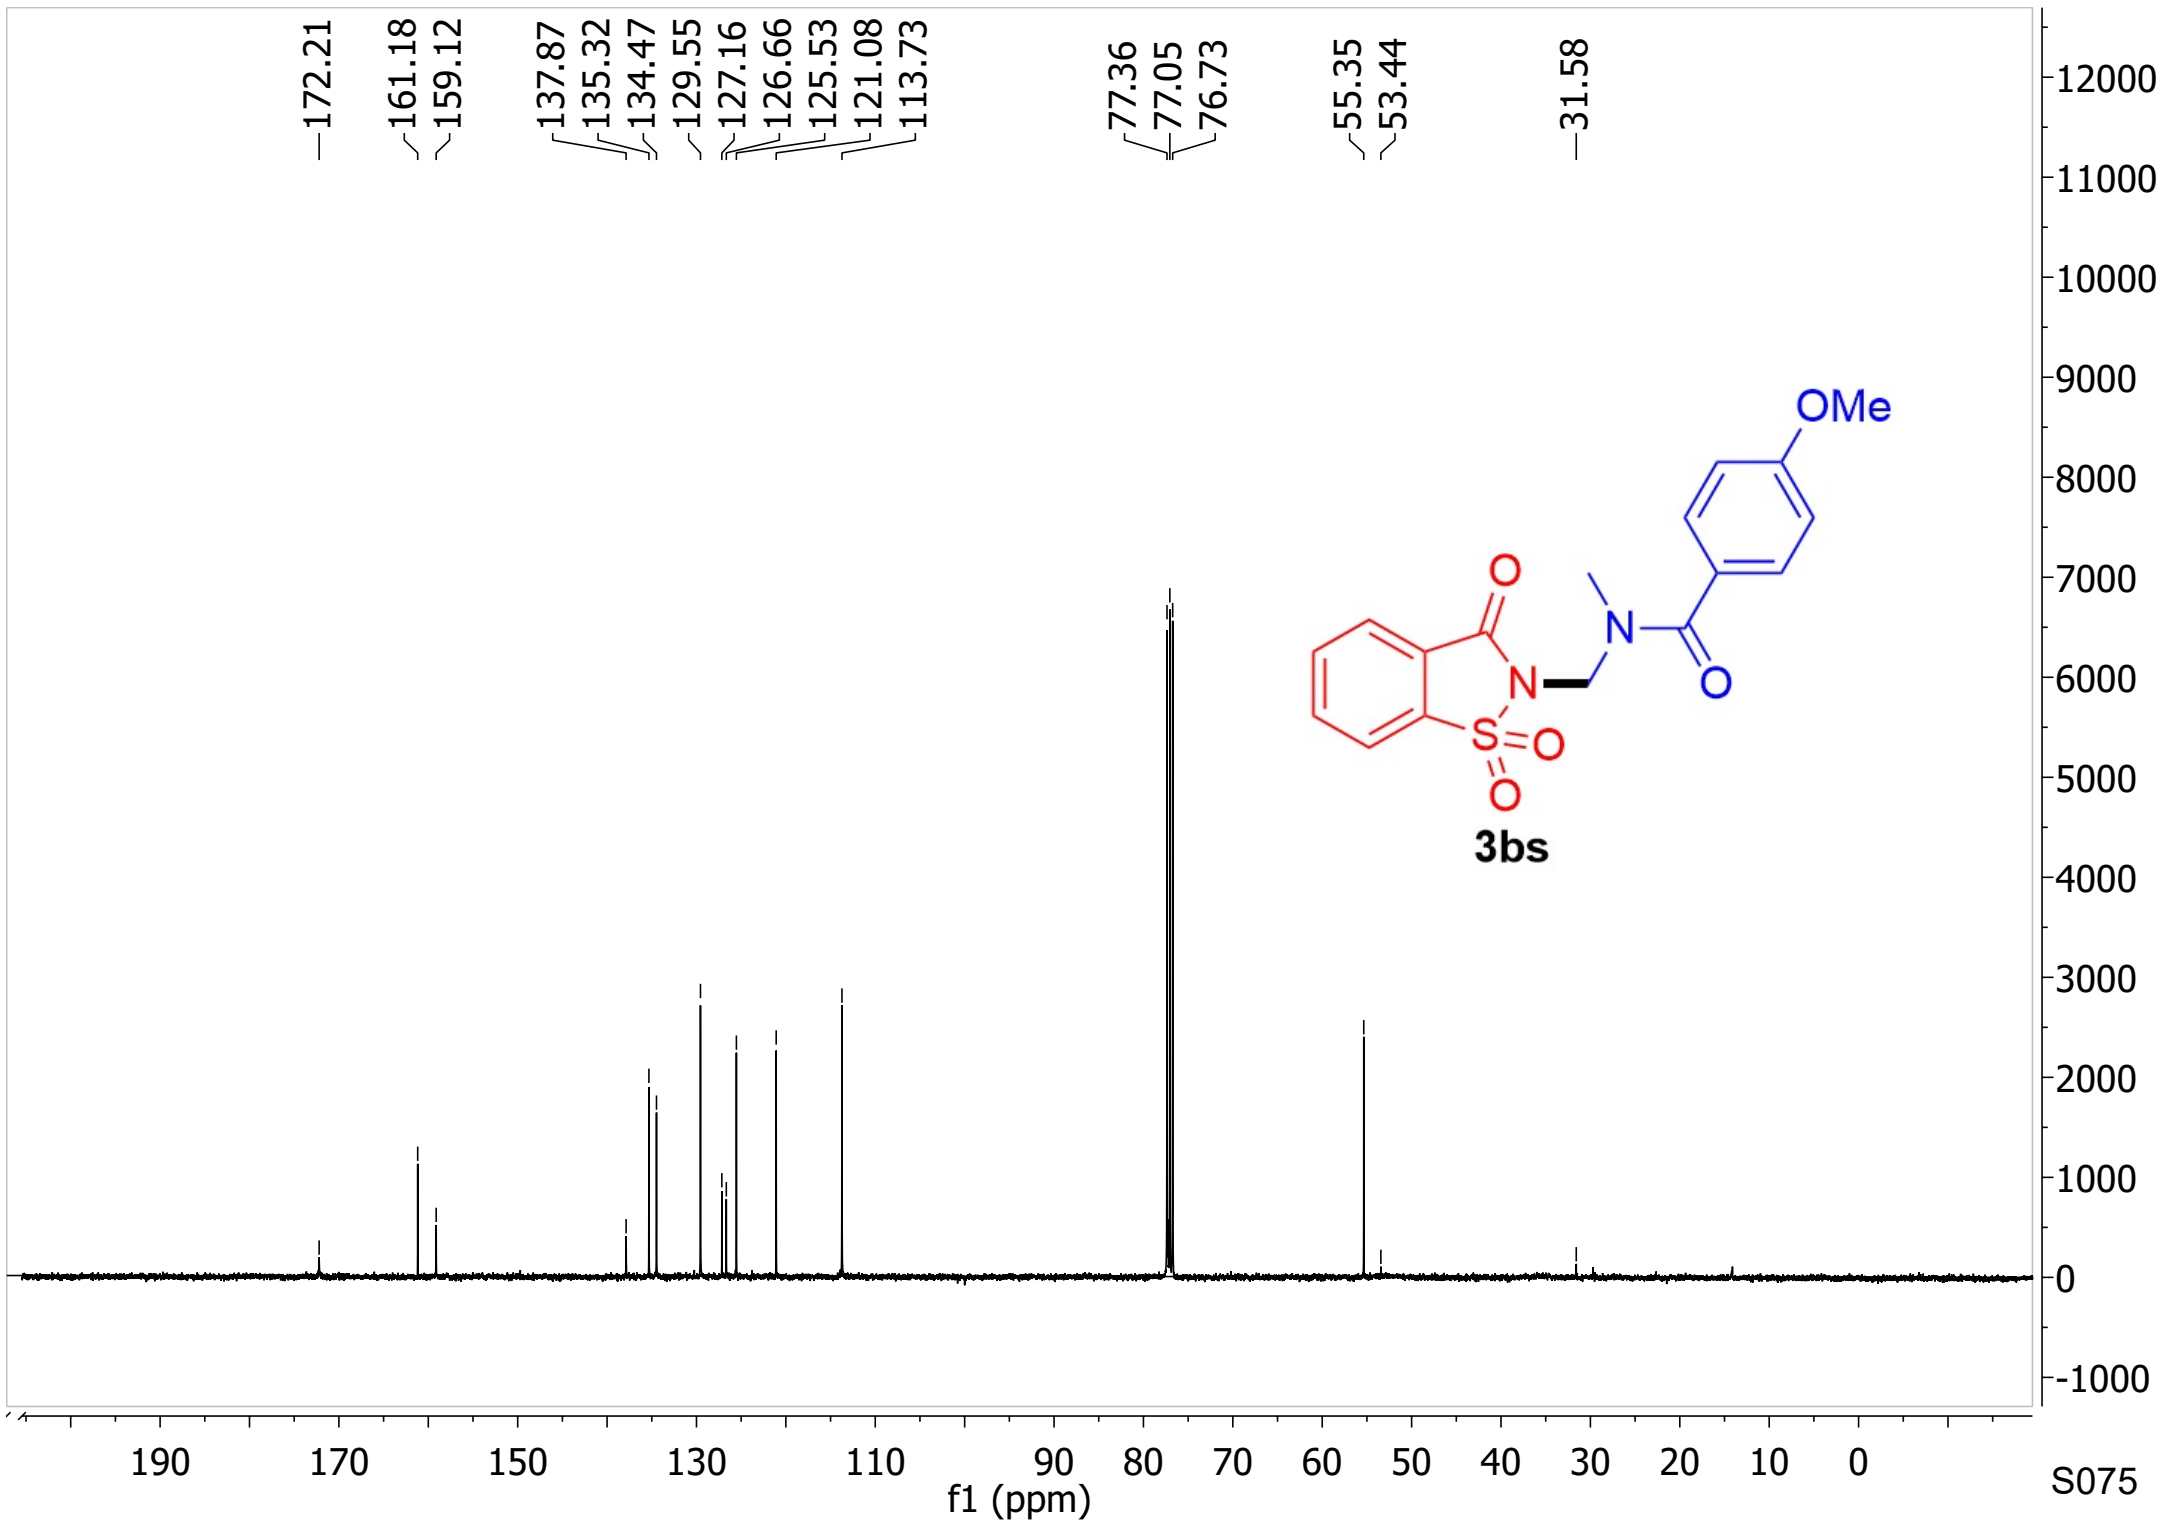





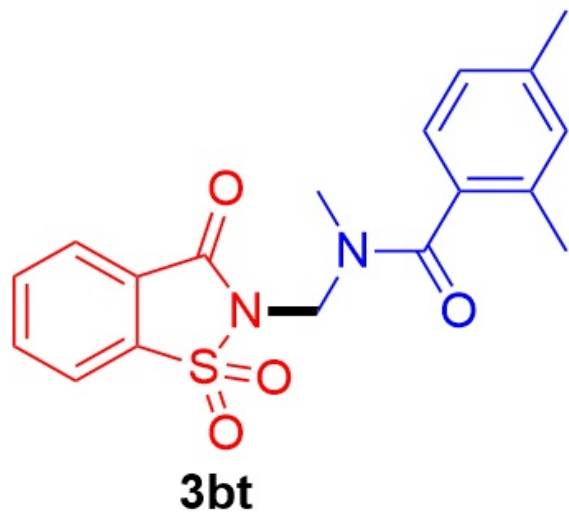

172.36  
171.97  
159.31  
158.88  
139.60  
139.07  
137.97  
135.50  
135.36  
134.63  
134.55  
134.45  
132.44  
131.78  
131.45  
131.17  
127.28  
126.67  
126.44  
125.98  
125.52  
121.11  
54.54  
49.65  
35.38  
31.13  
21.24  
19.12  
18.84

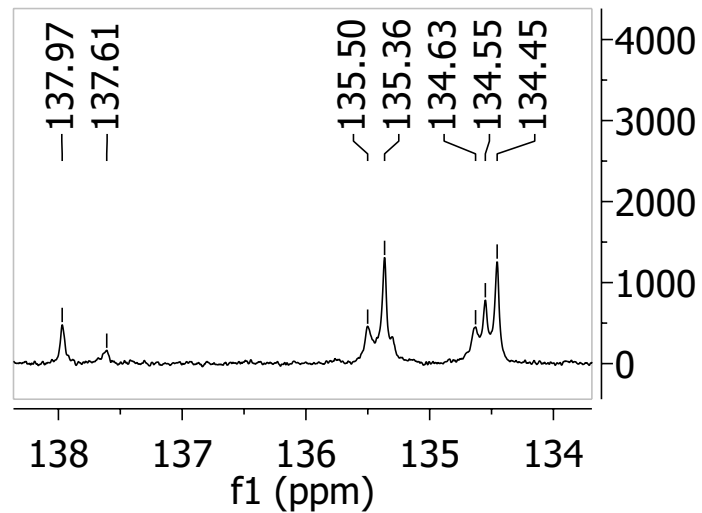

210 190 170 150 130 110 90 80 70 60 50 40 30 20 10 0

f1 (ppm)

10000  
9000  
8000  
7000  
6000  
5000  
4000  
3000  
2000  
1000  
0  
-1000

S077

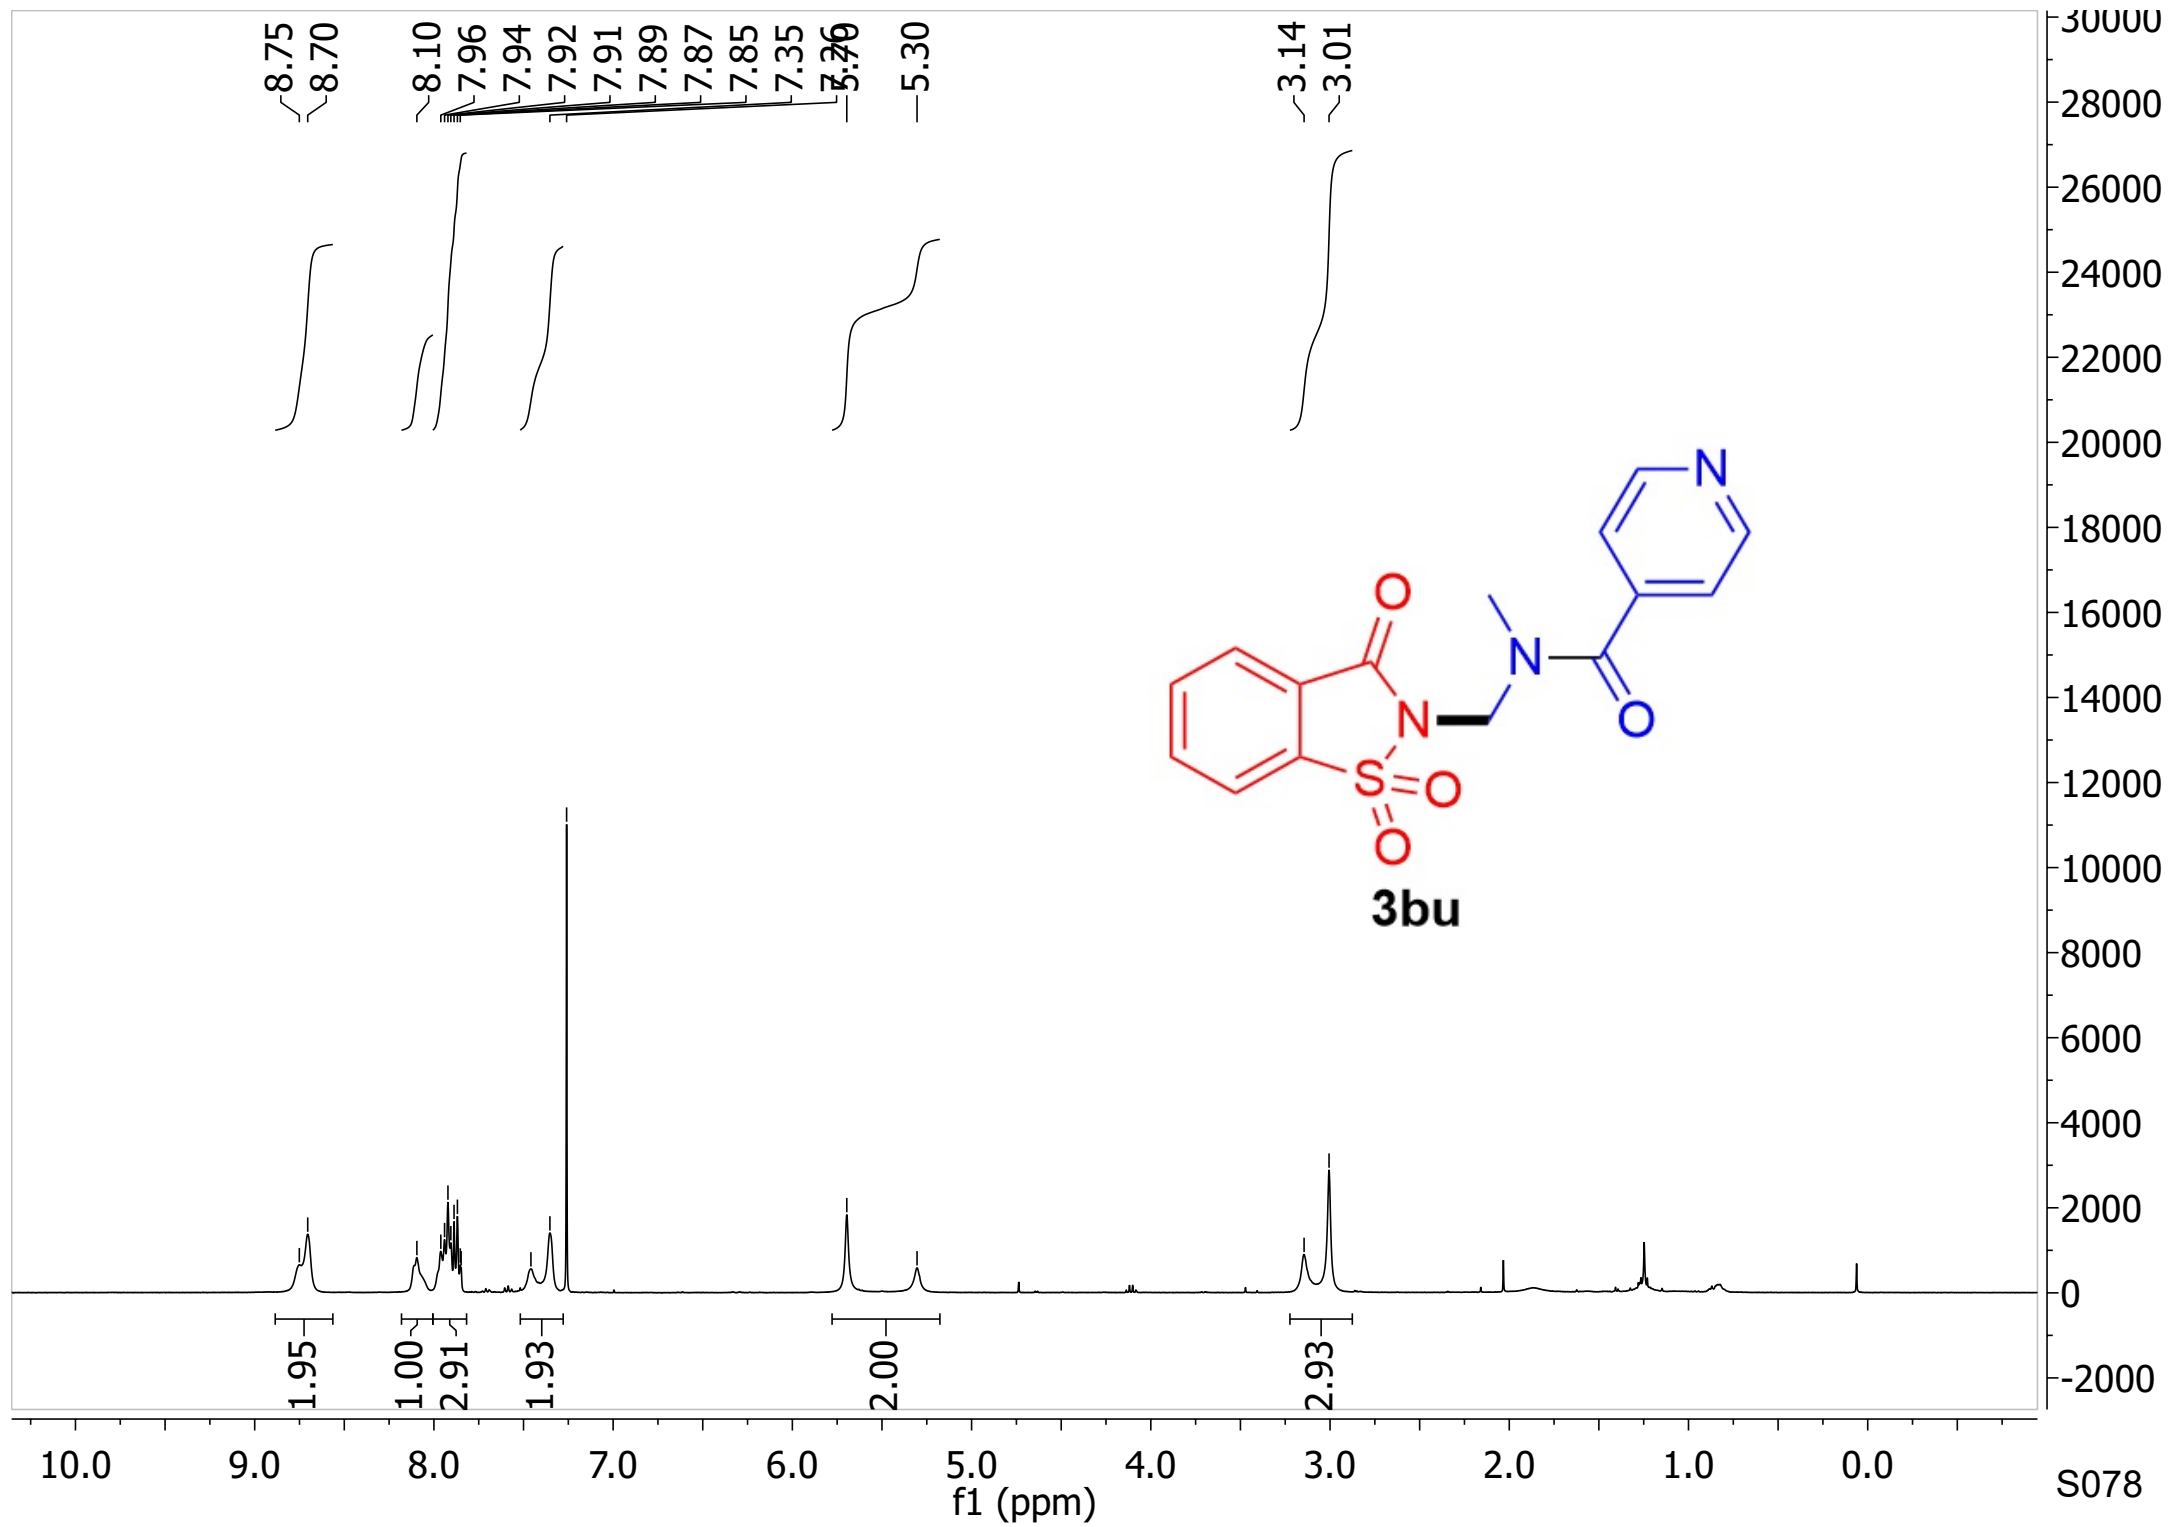

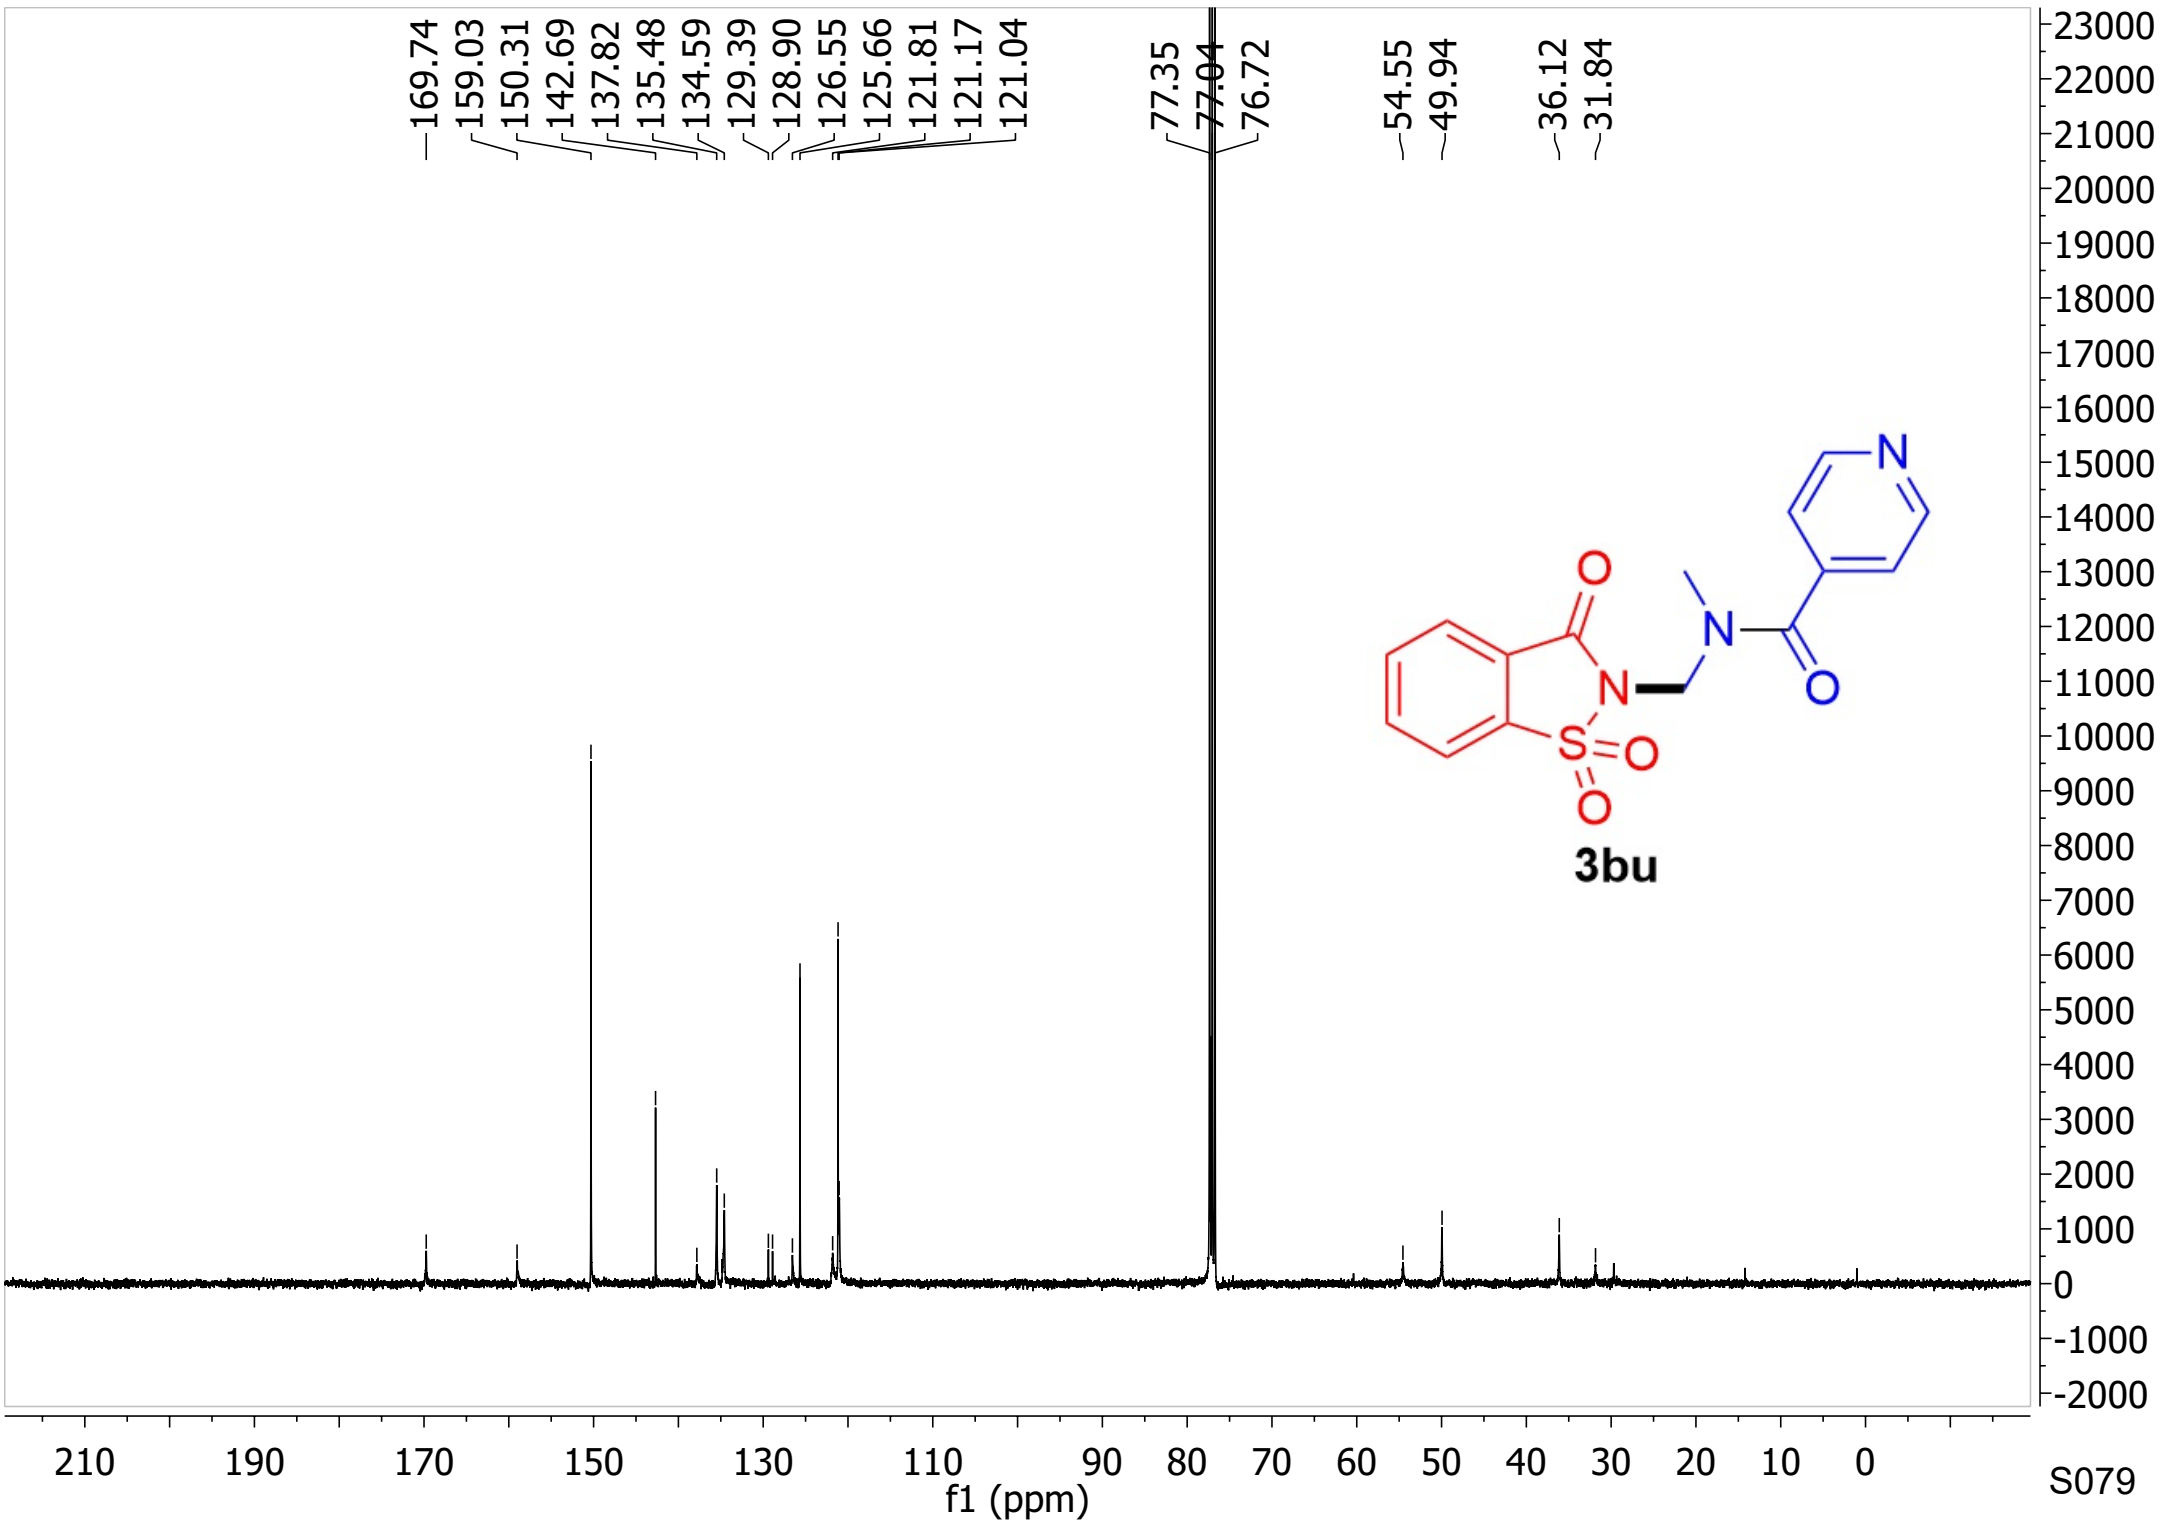

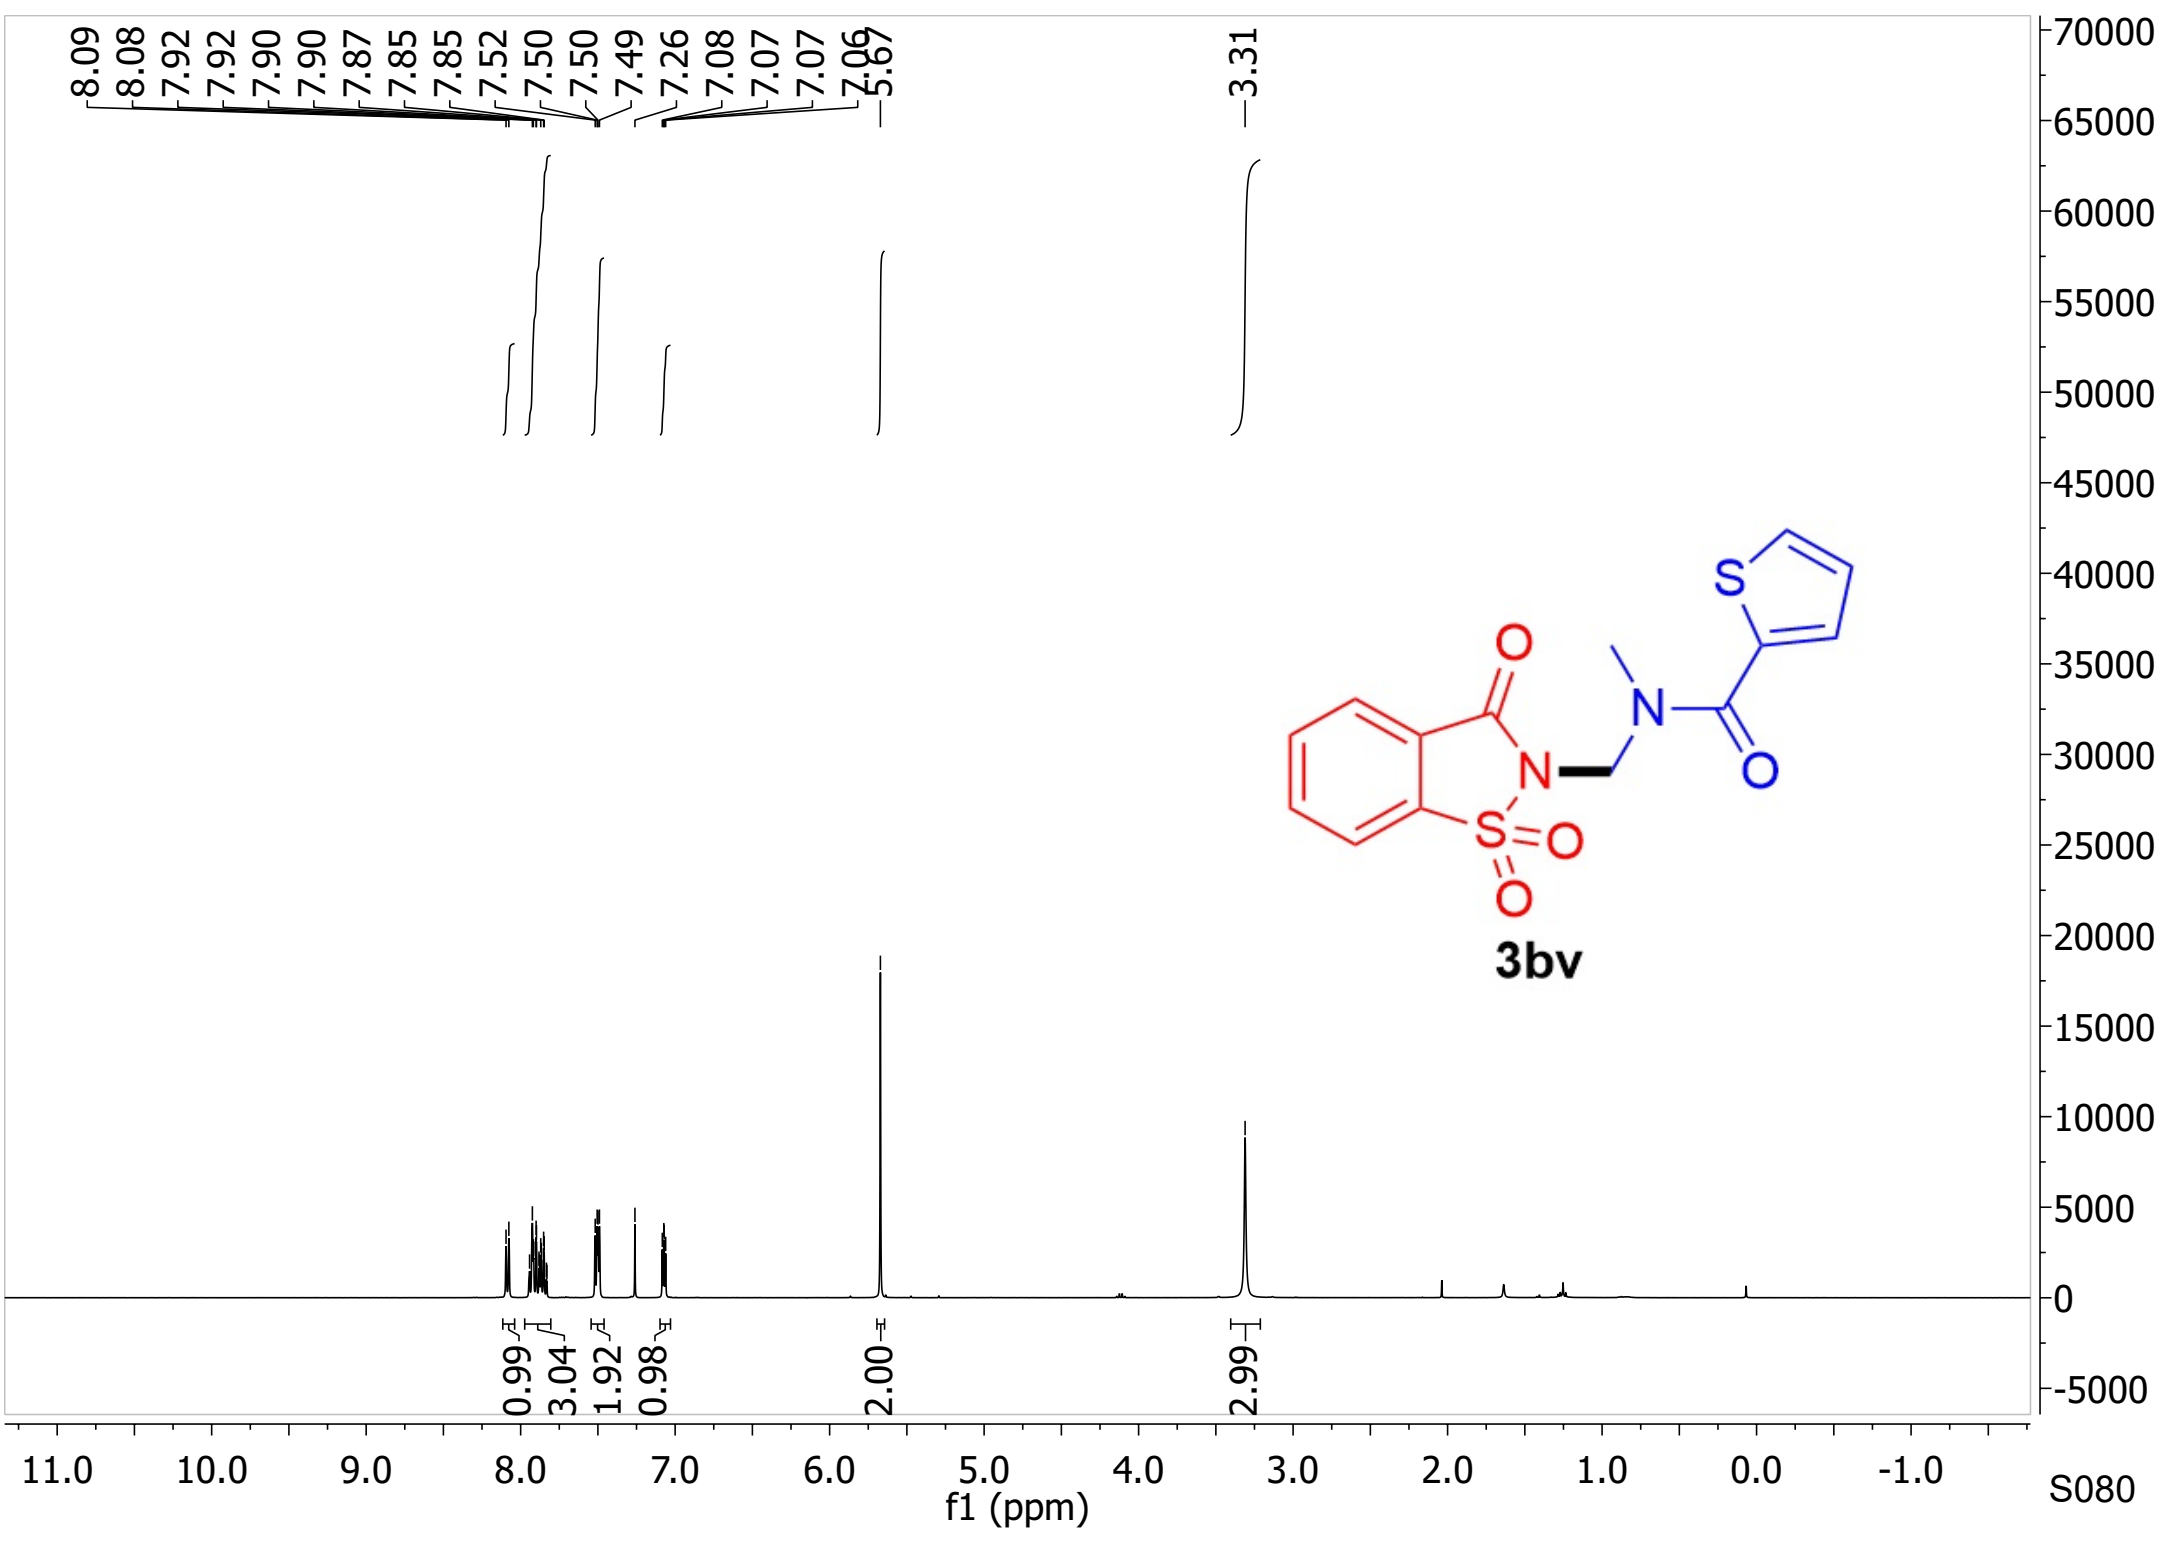

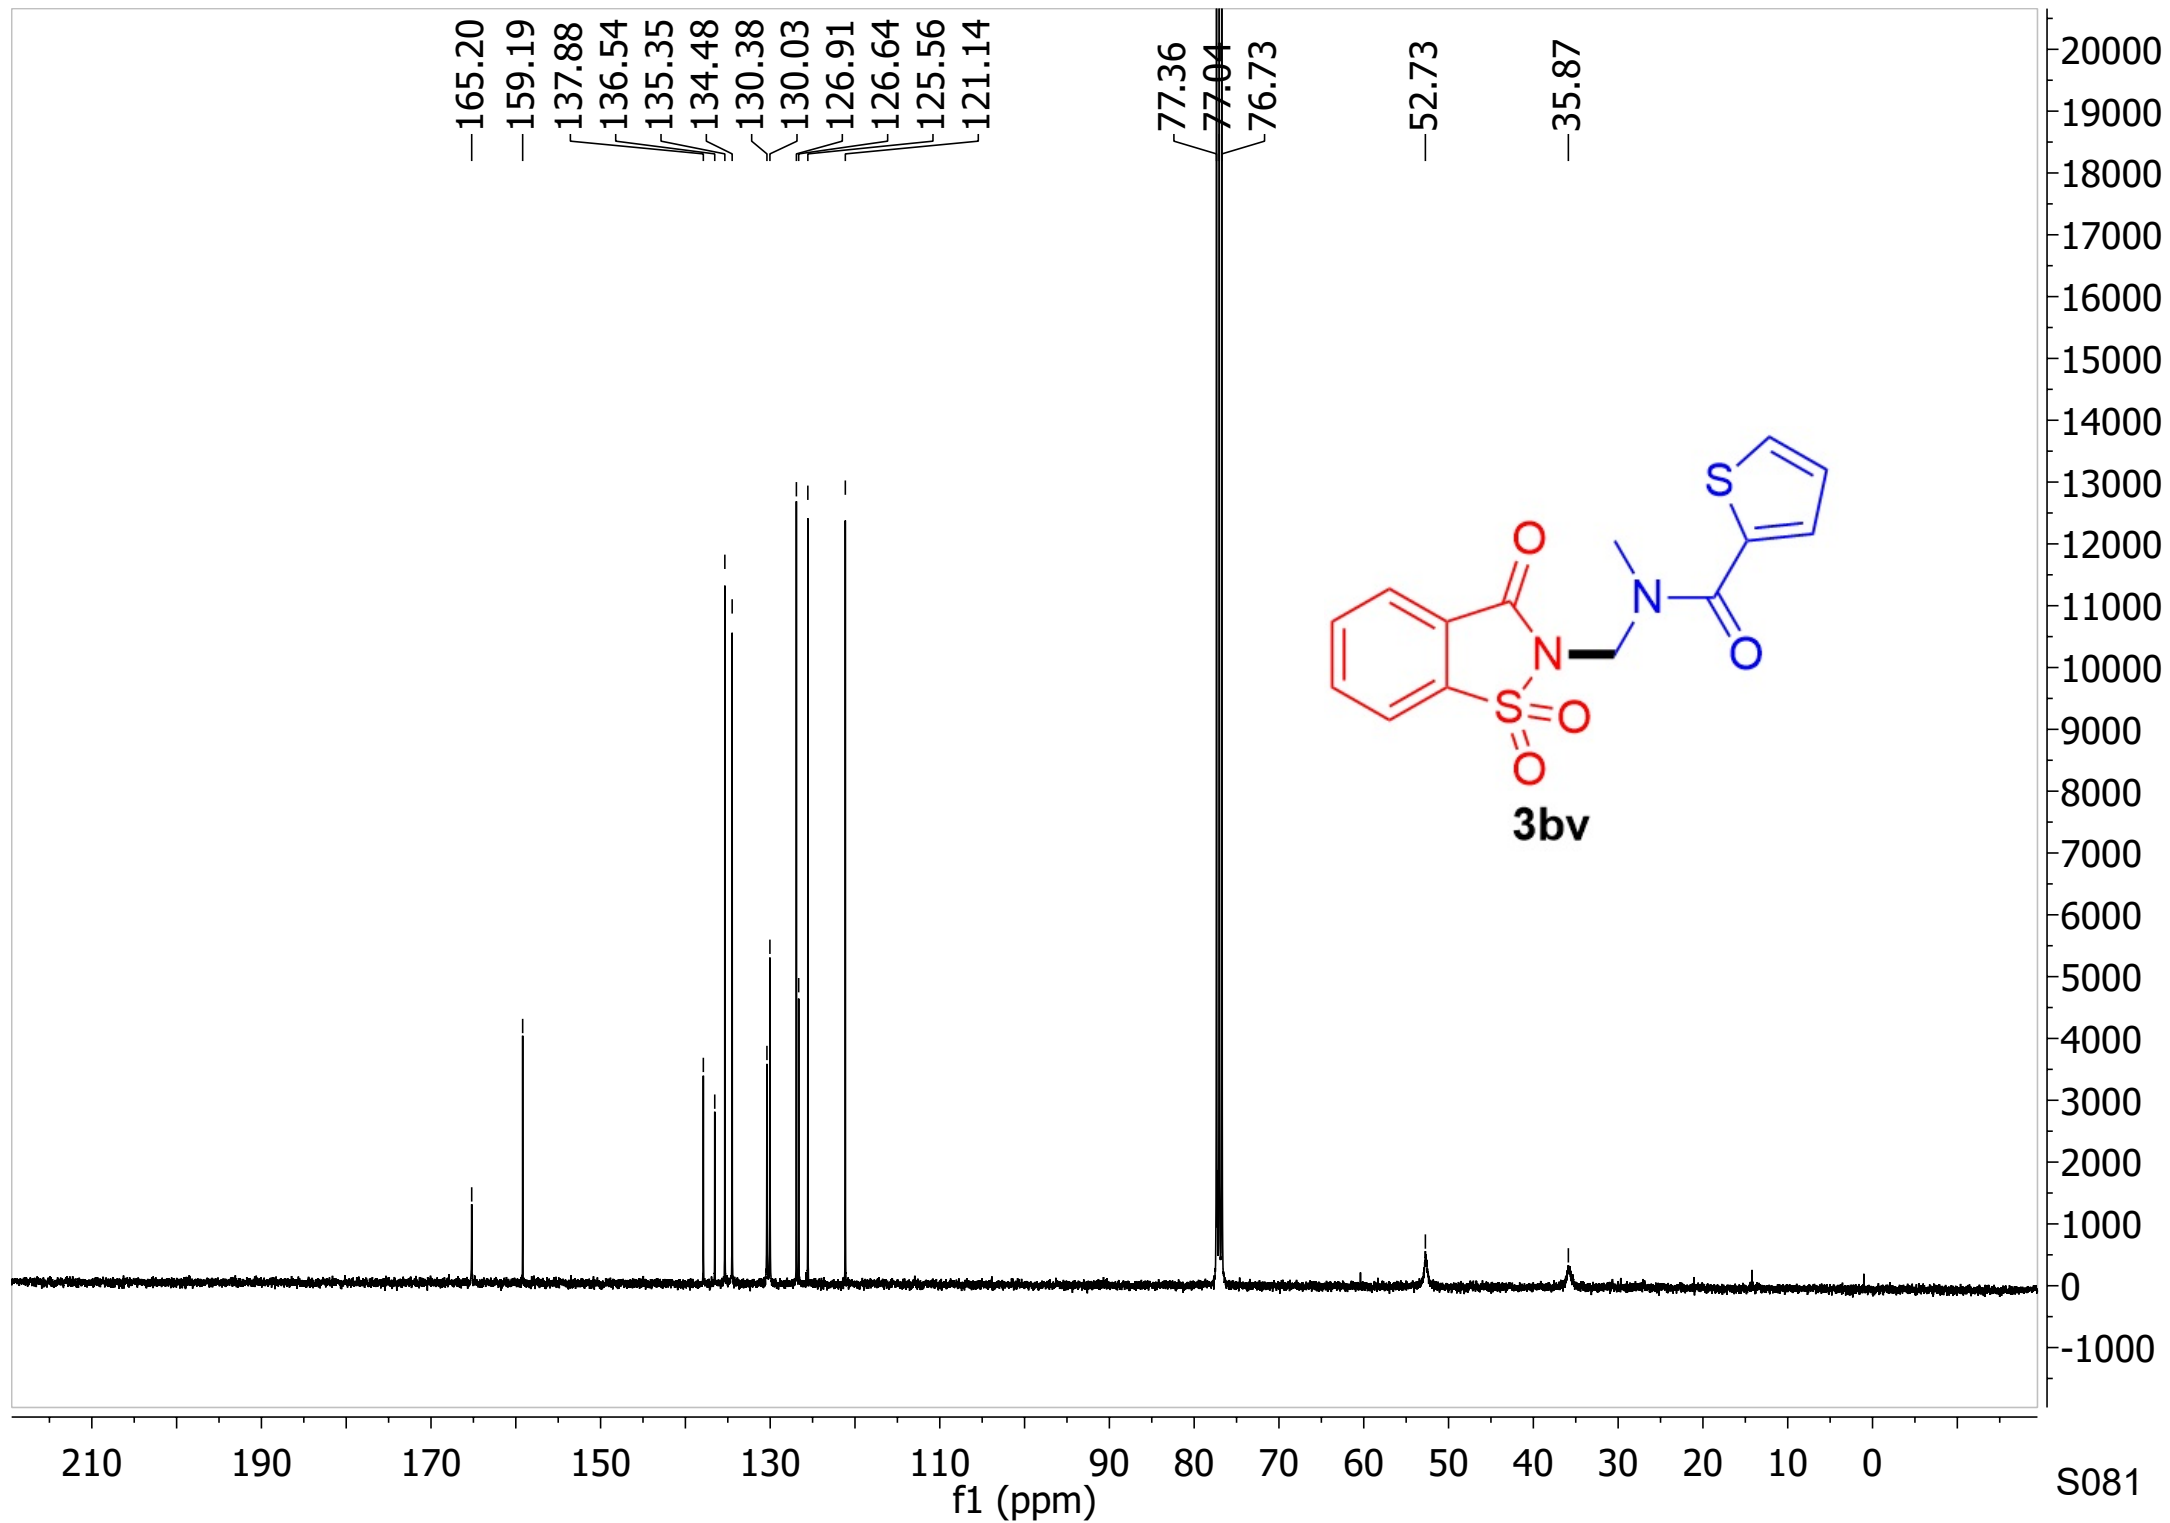

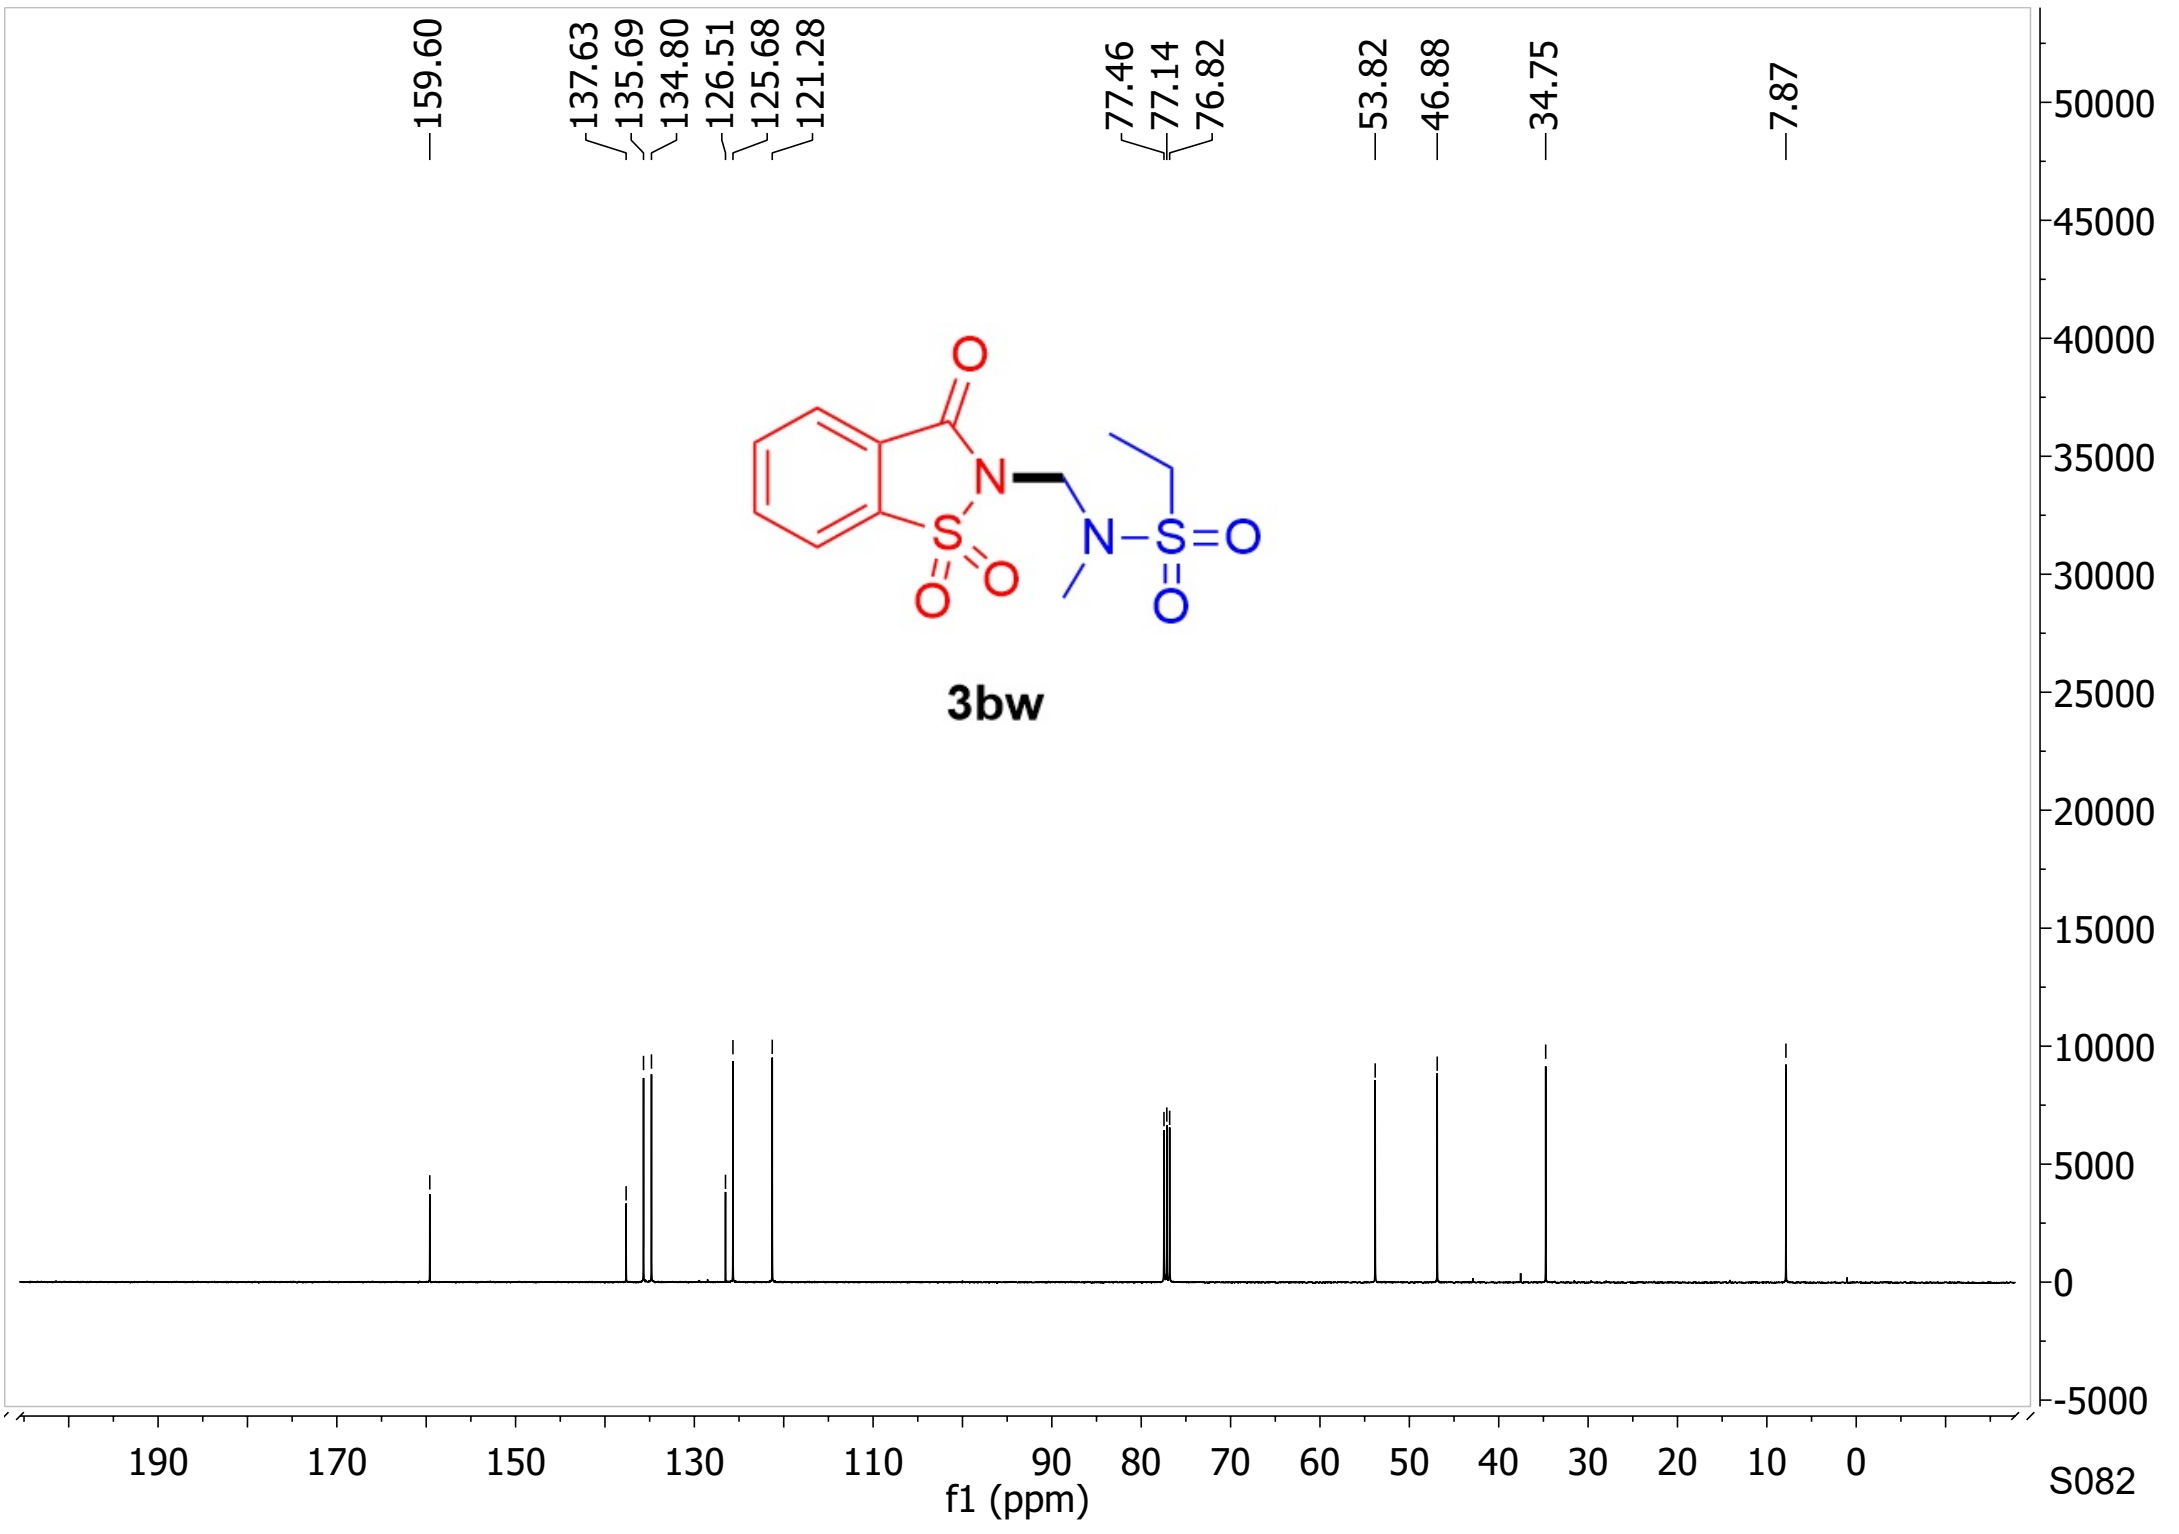

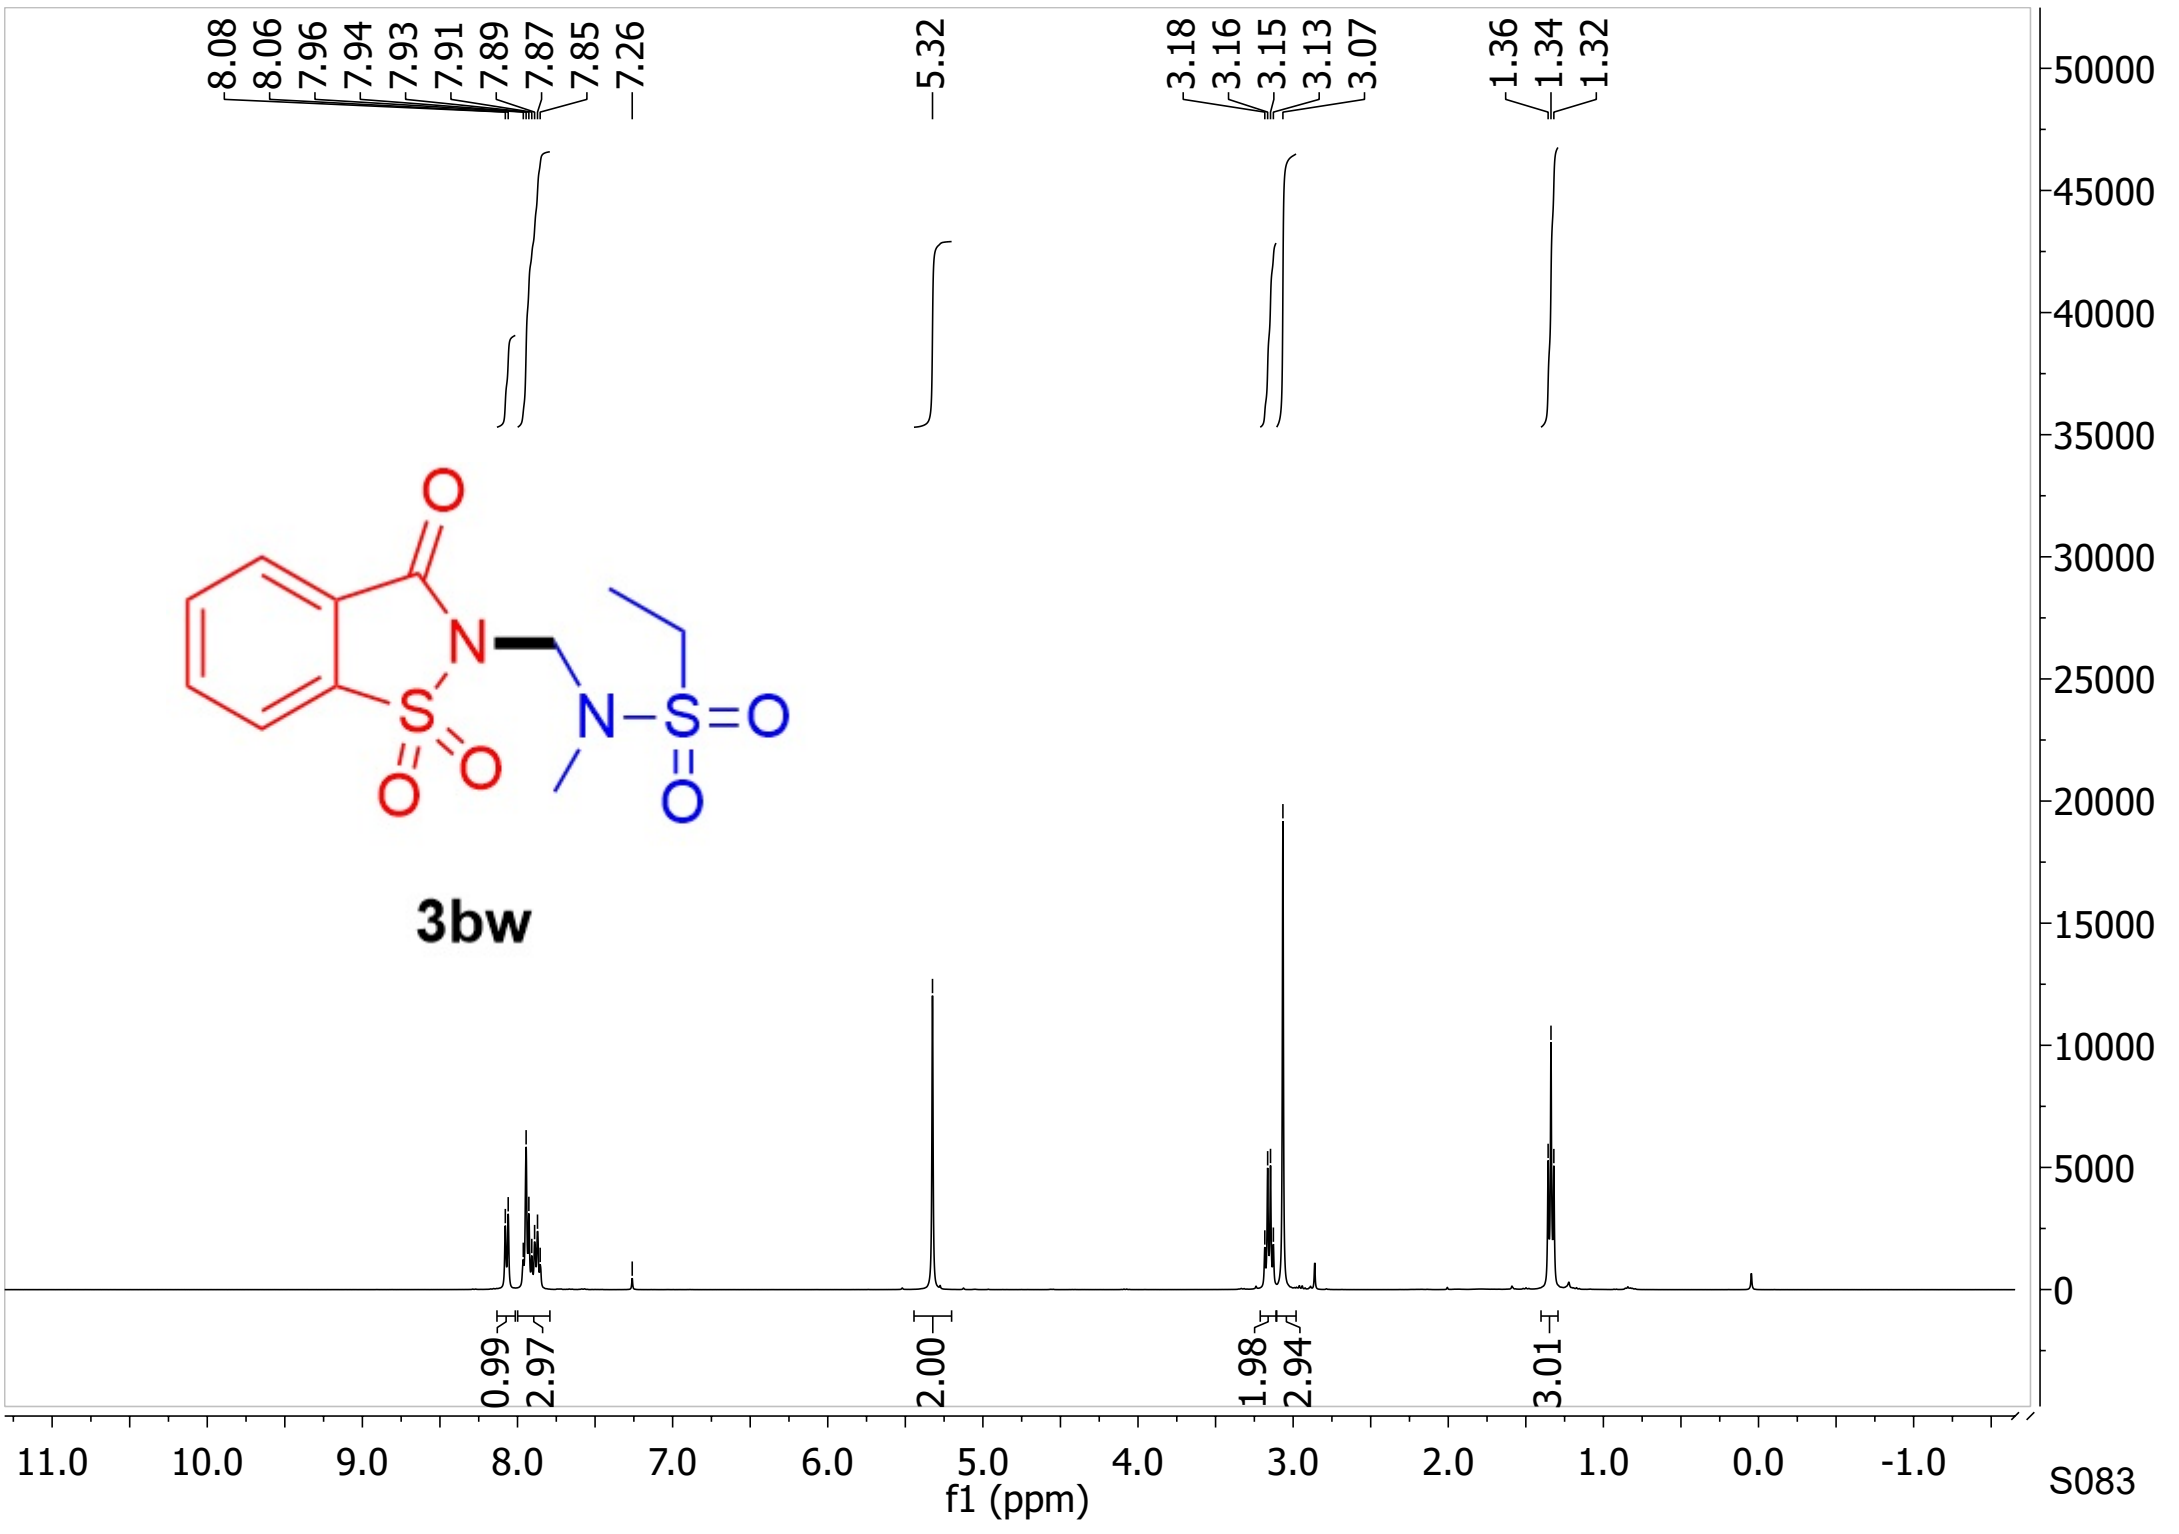



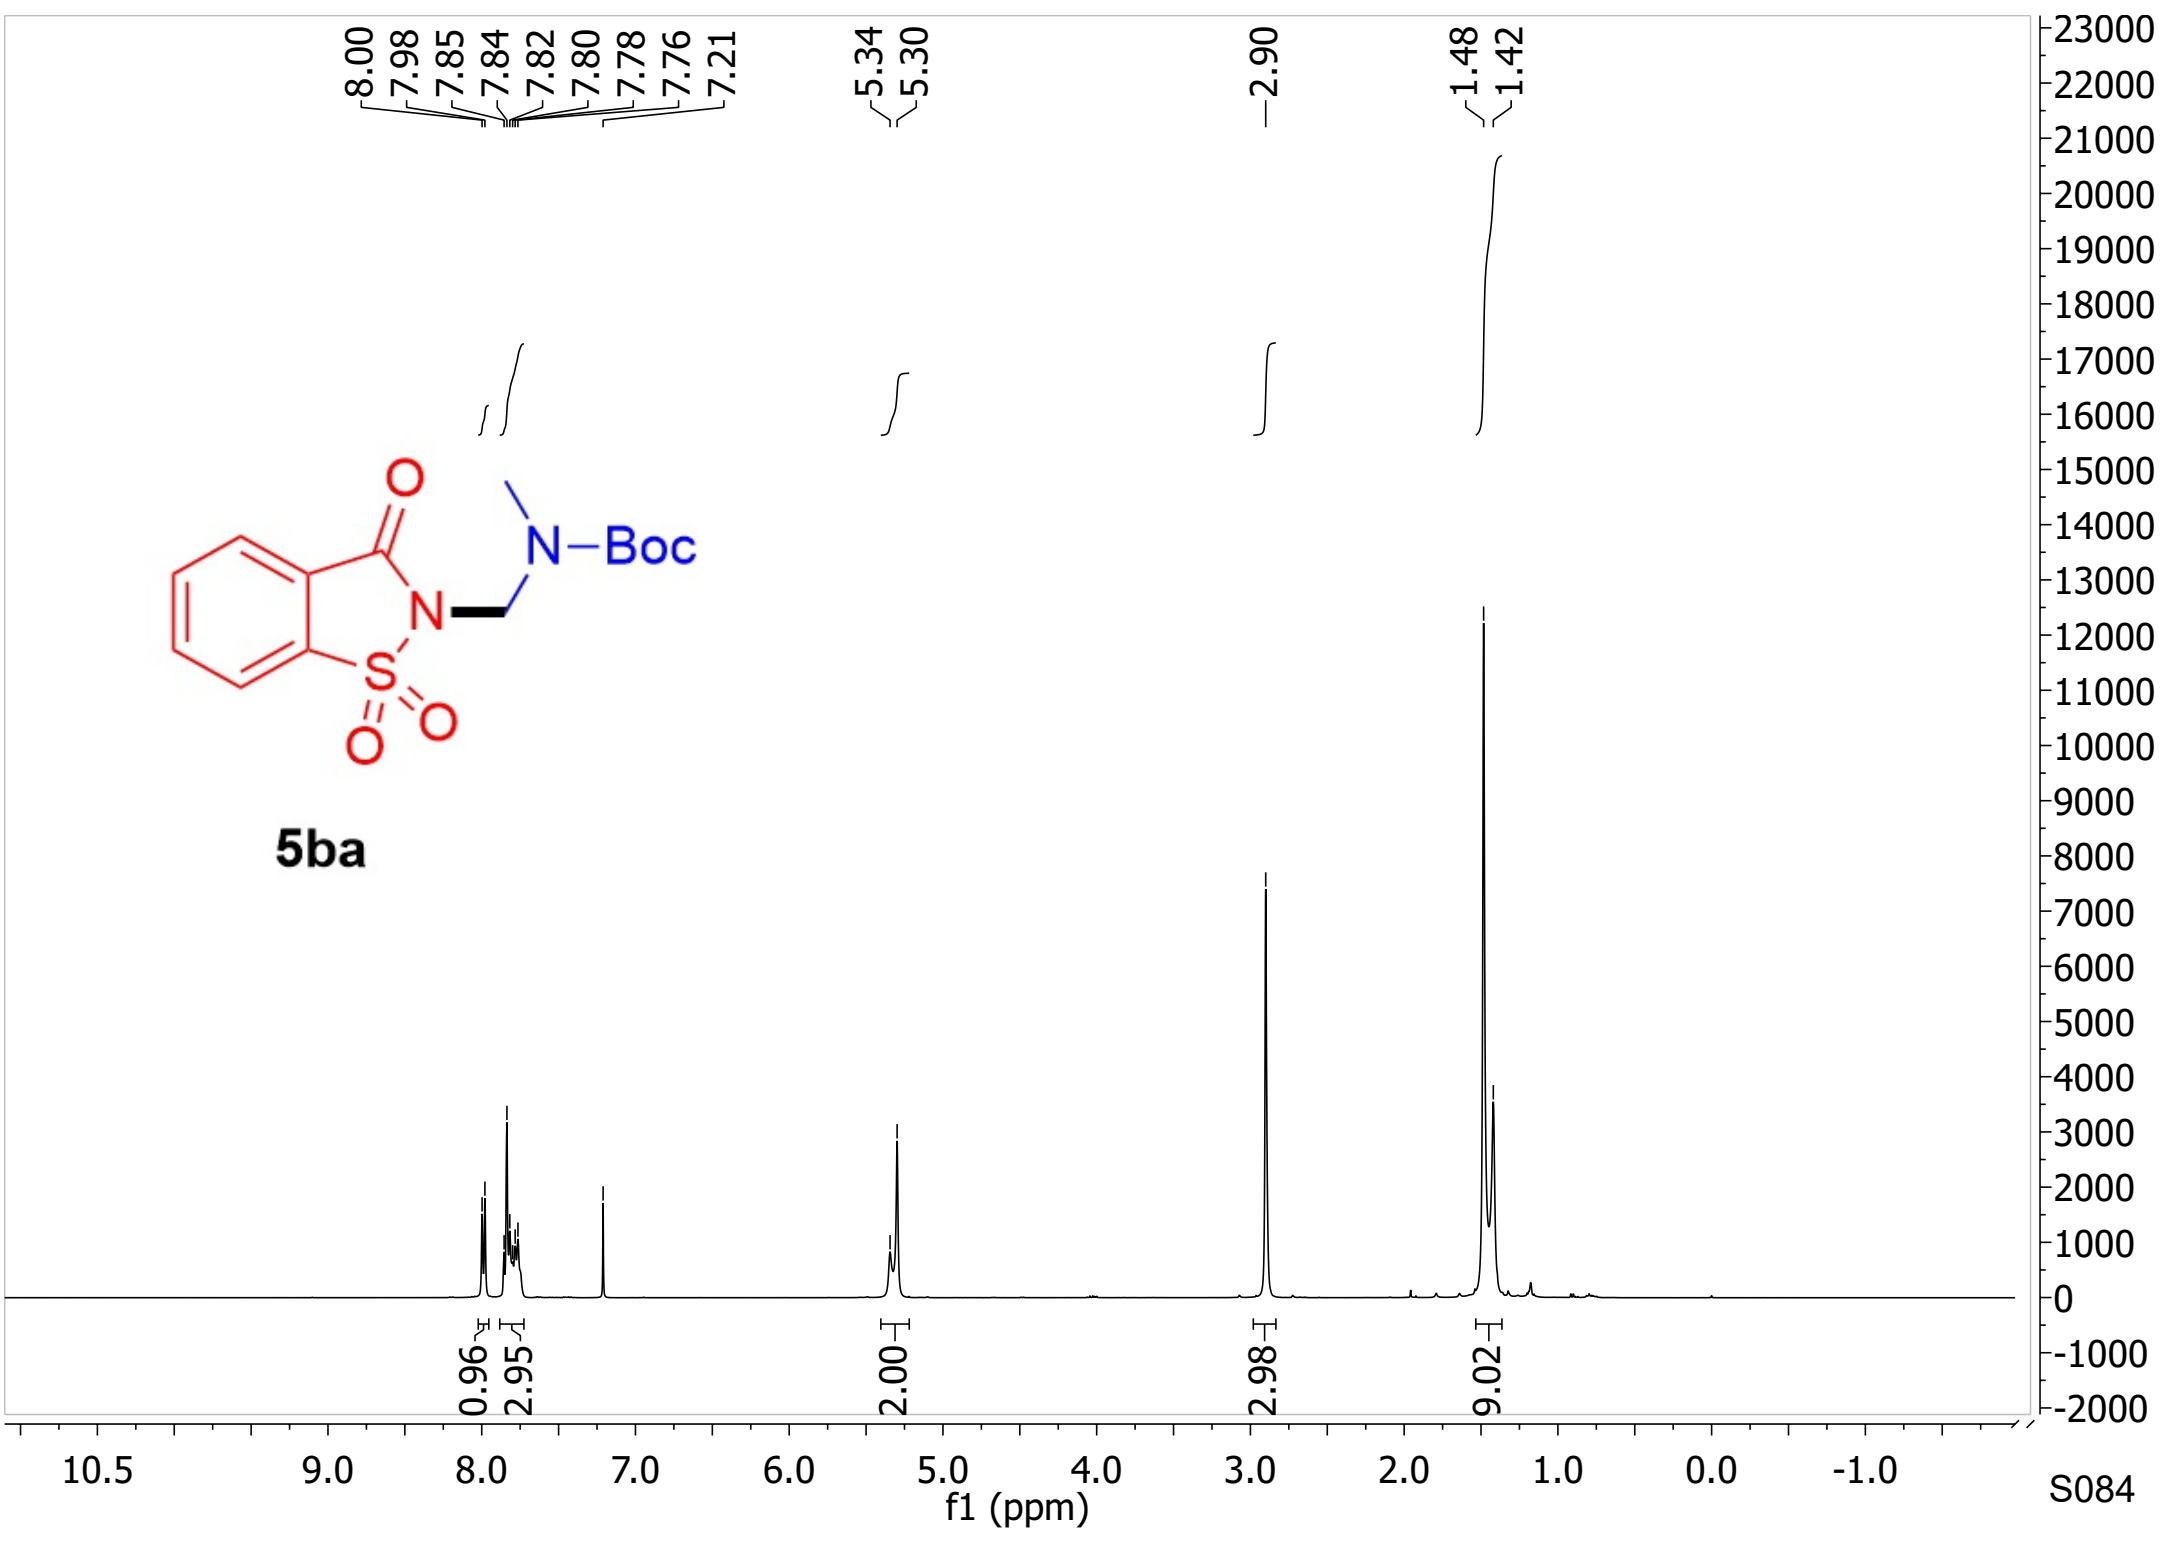

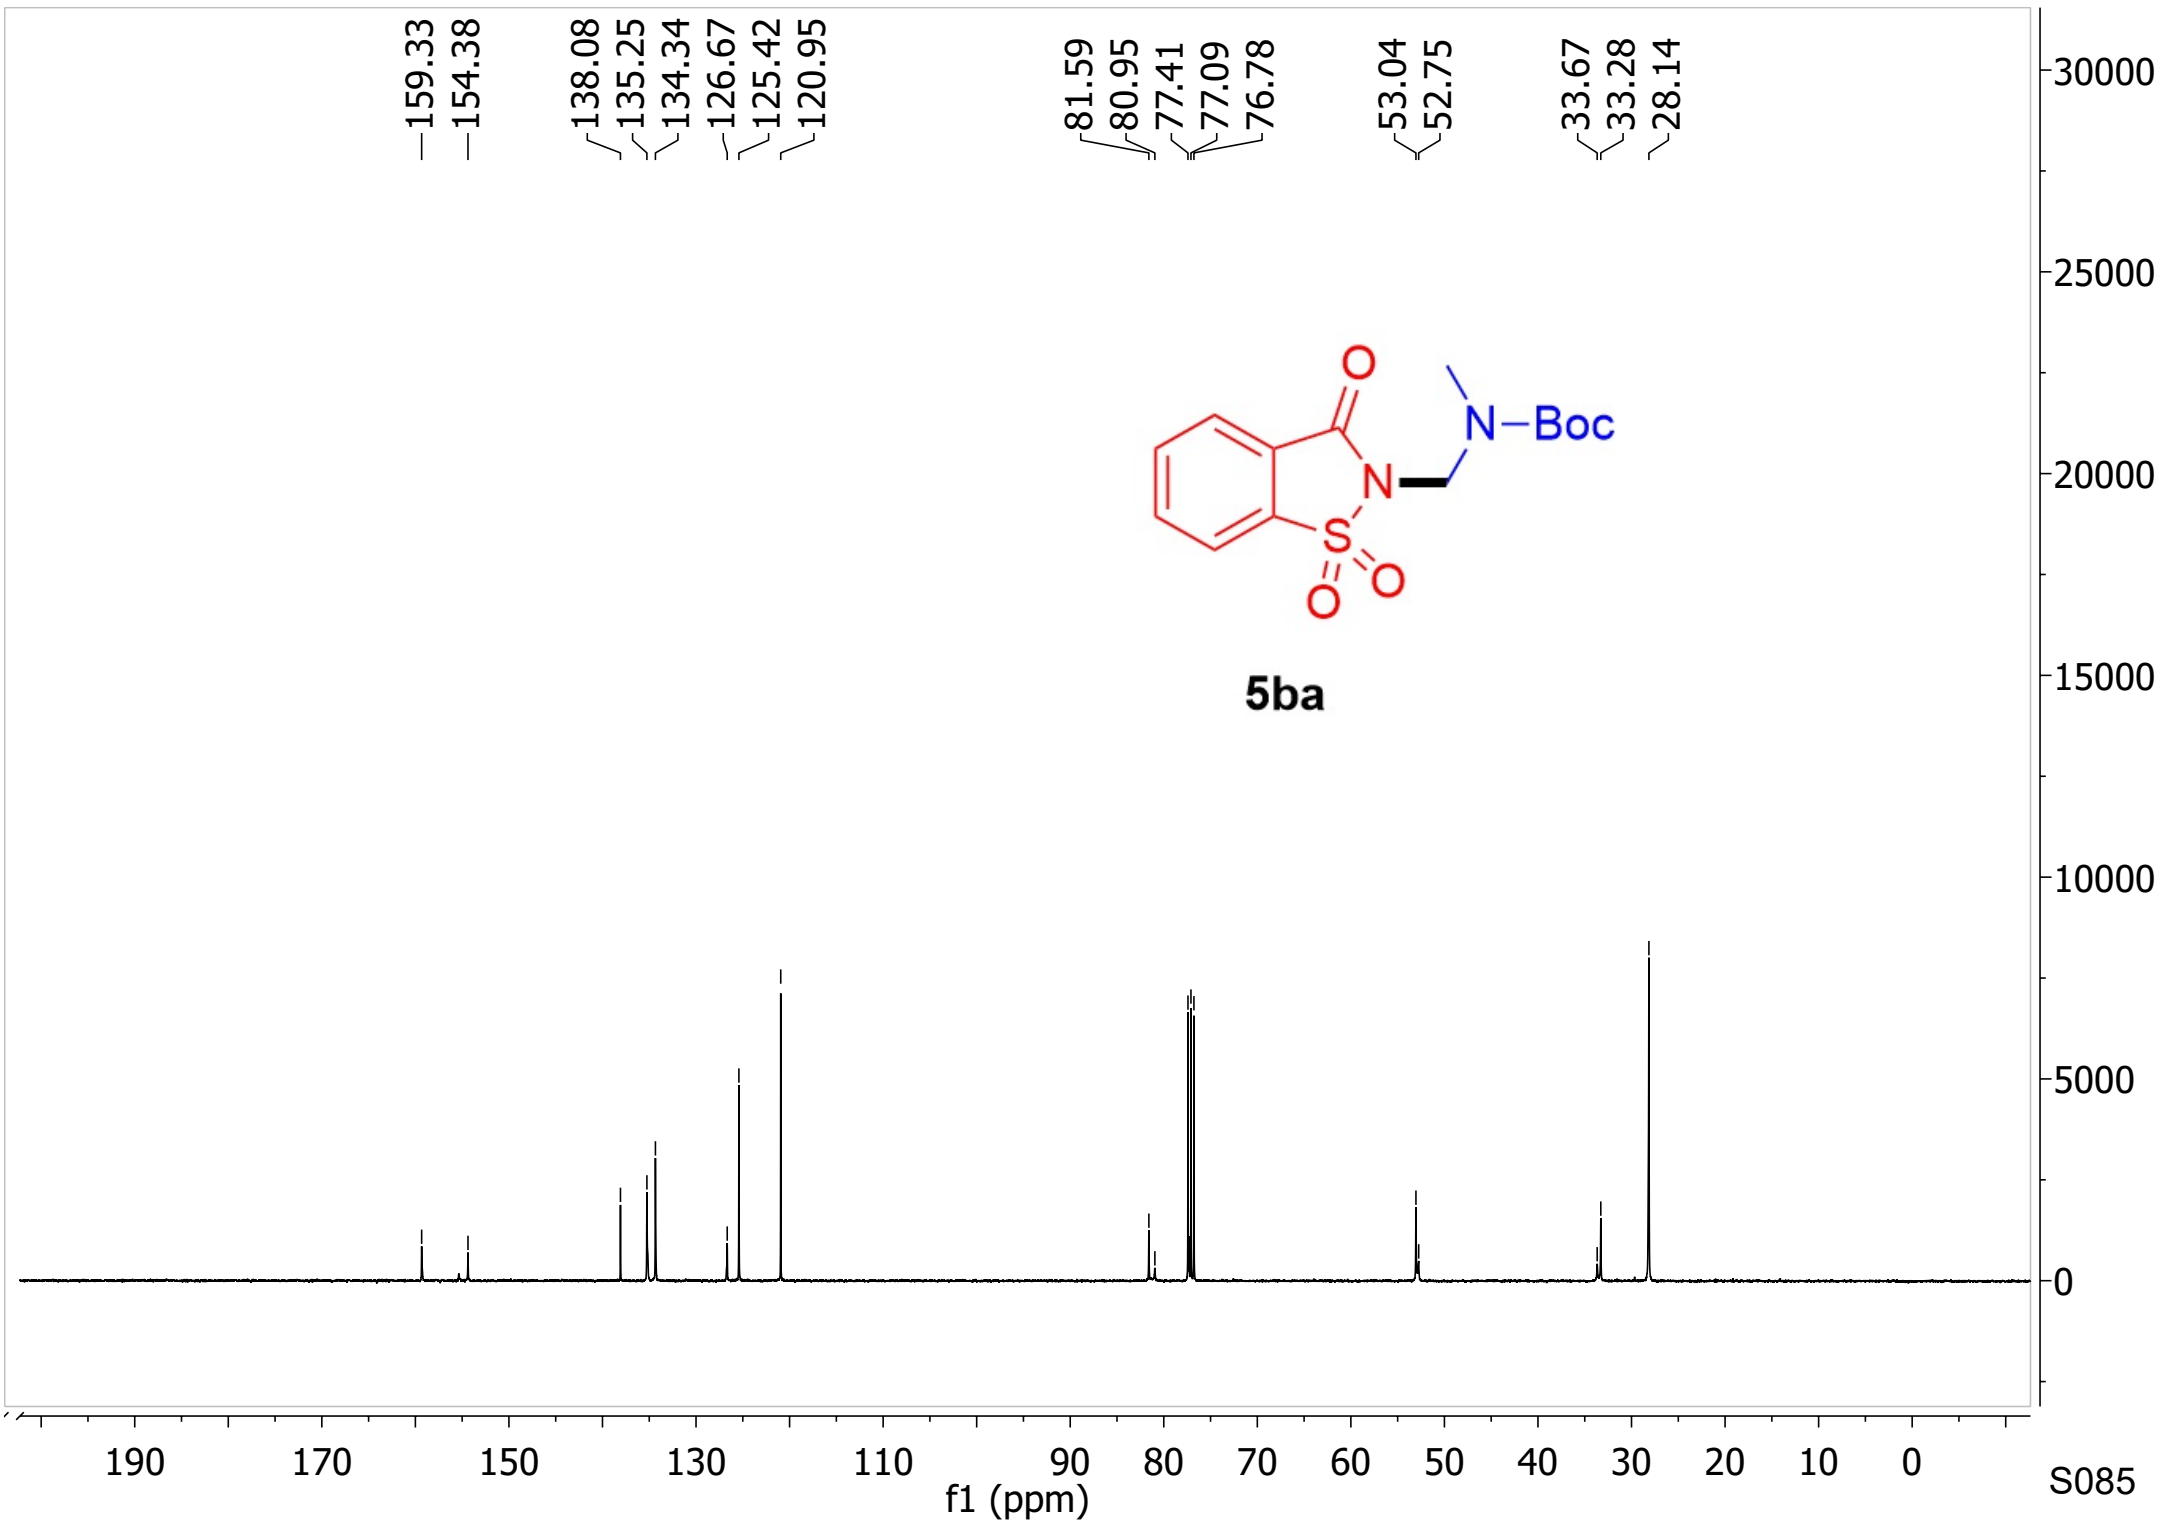

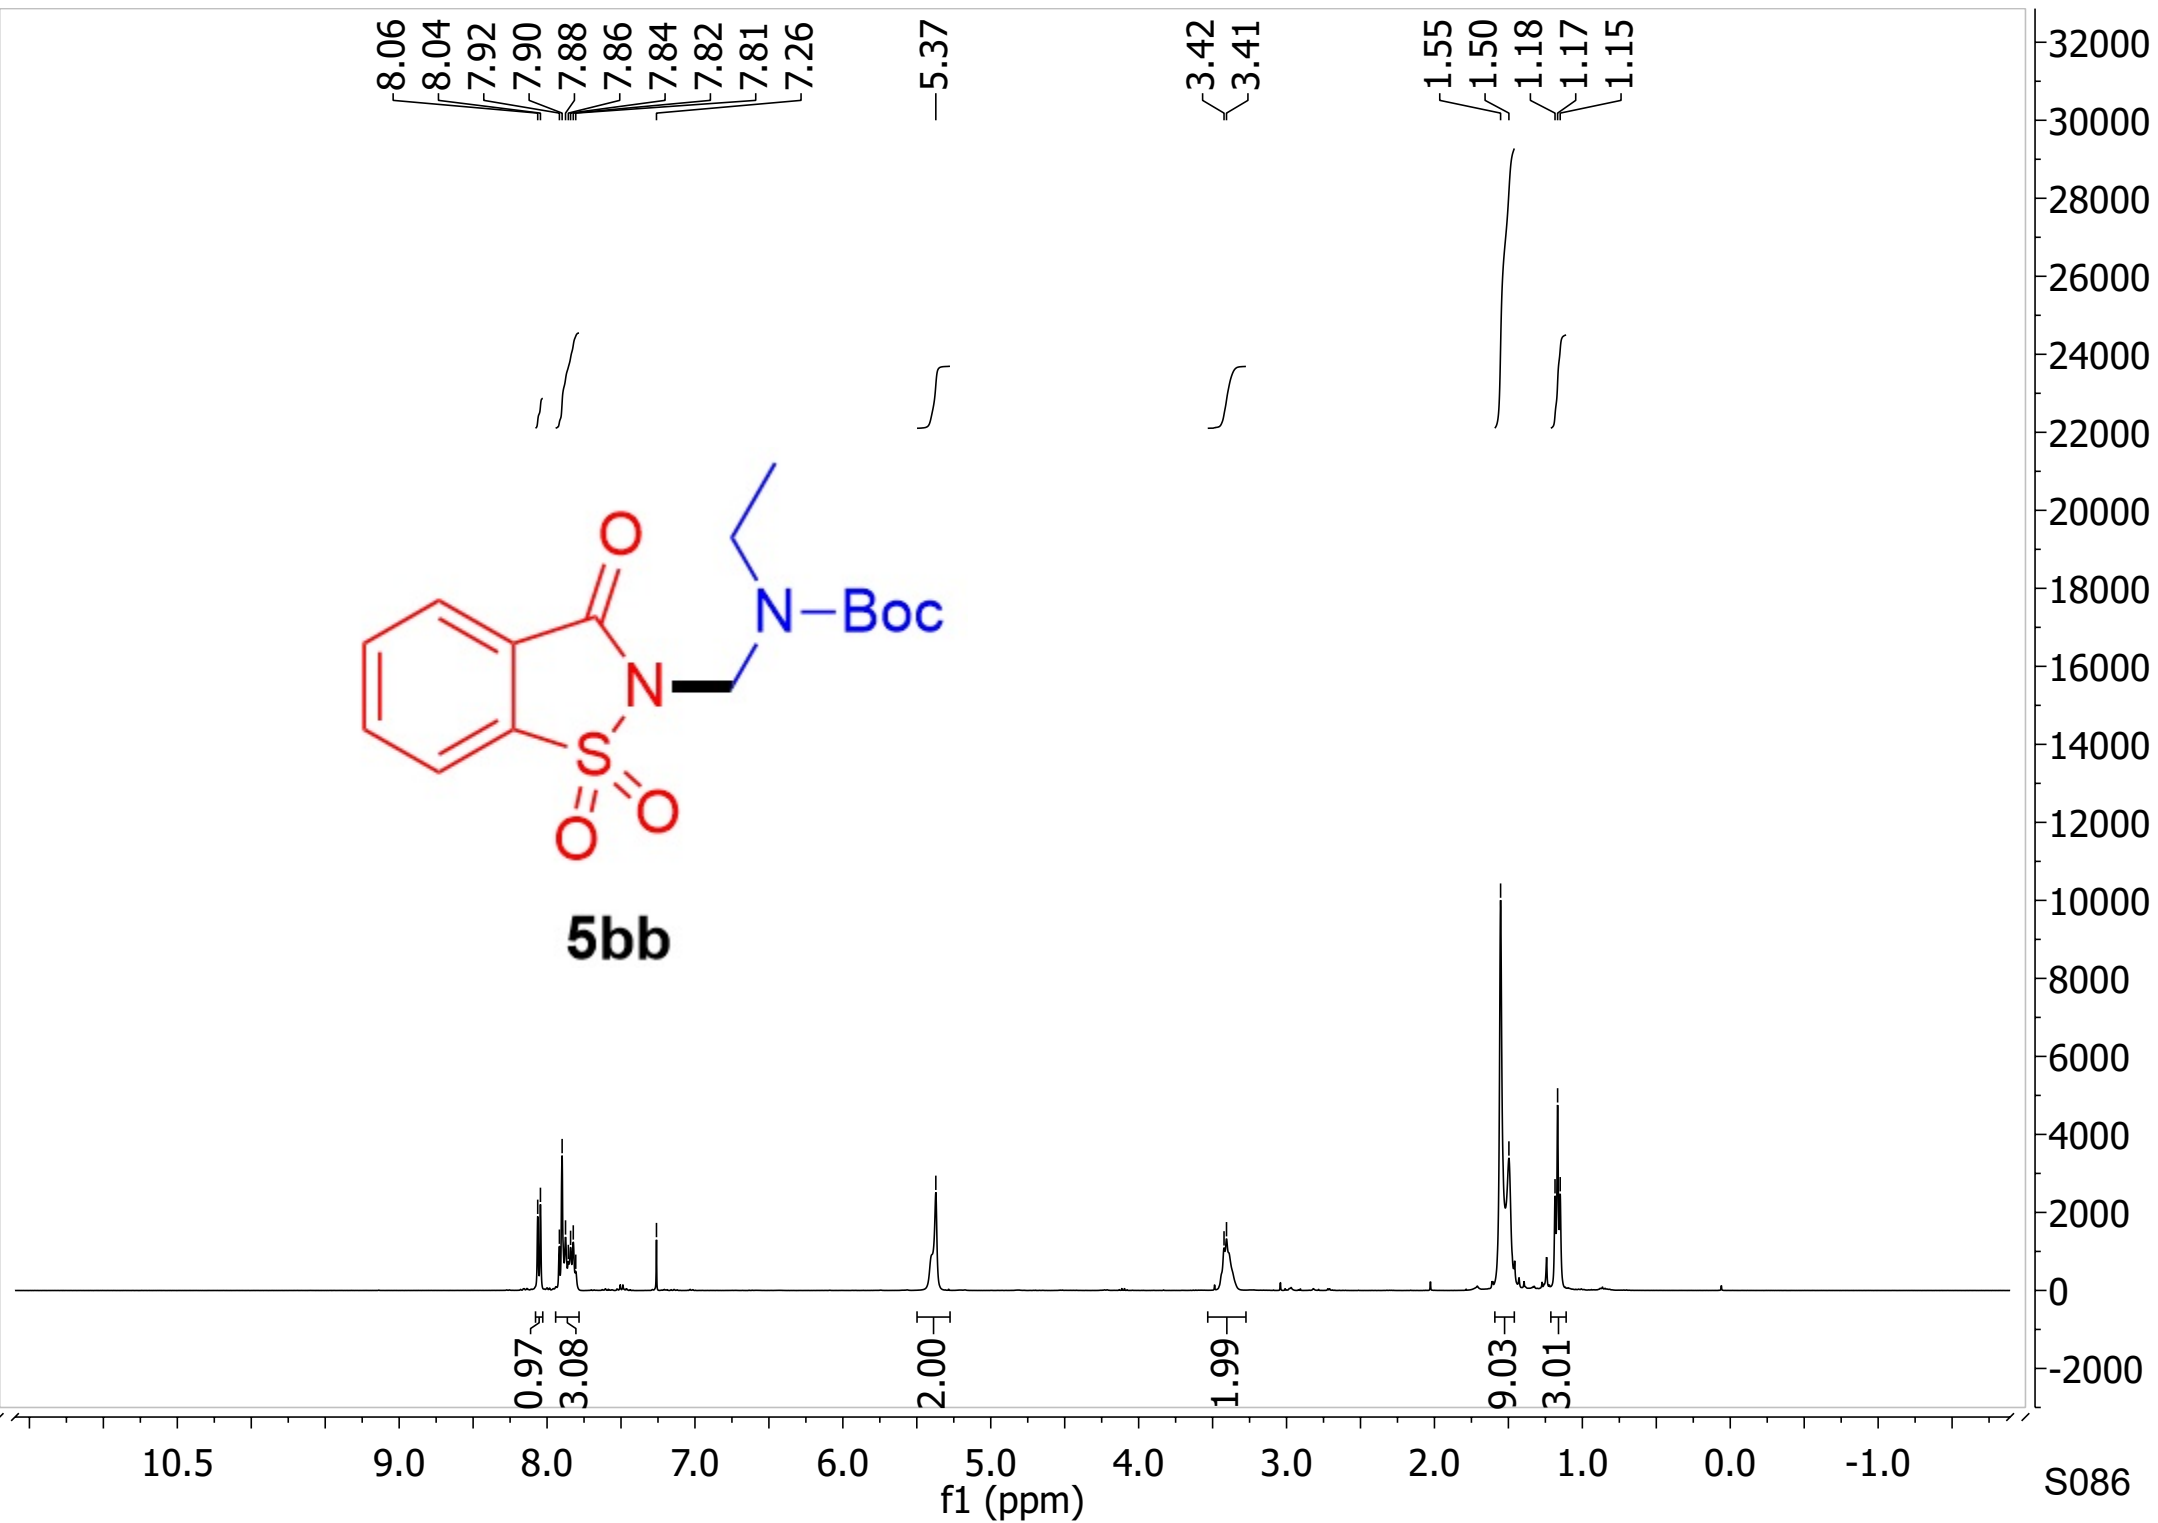

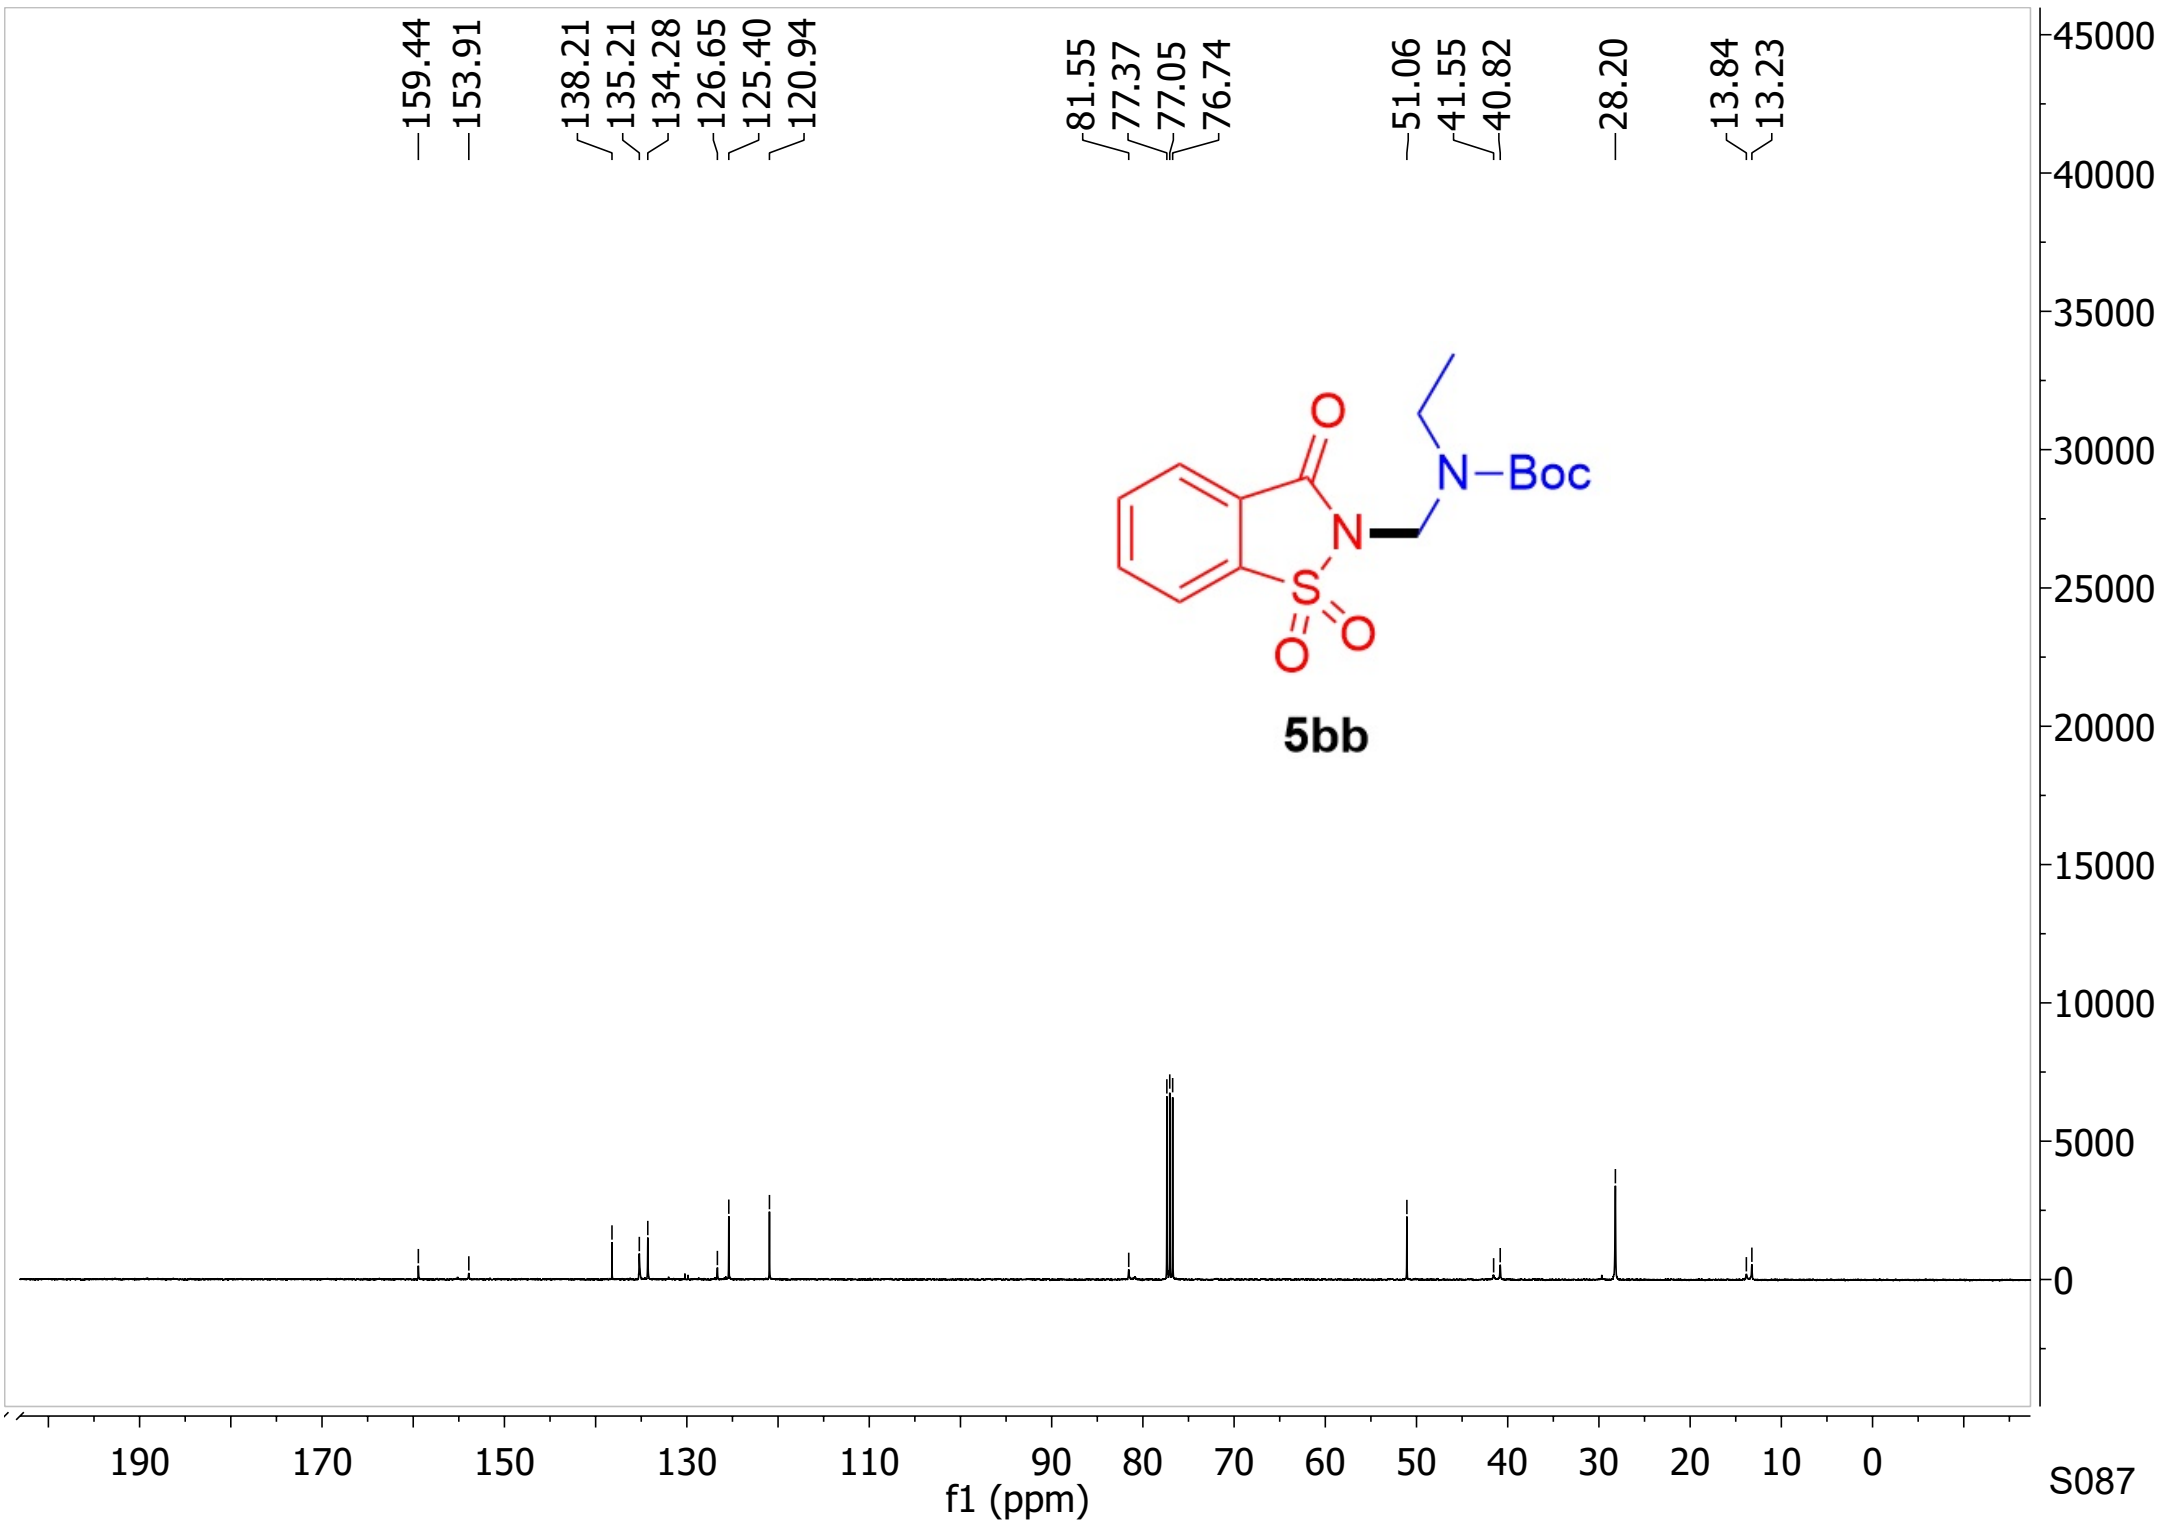

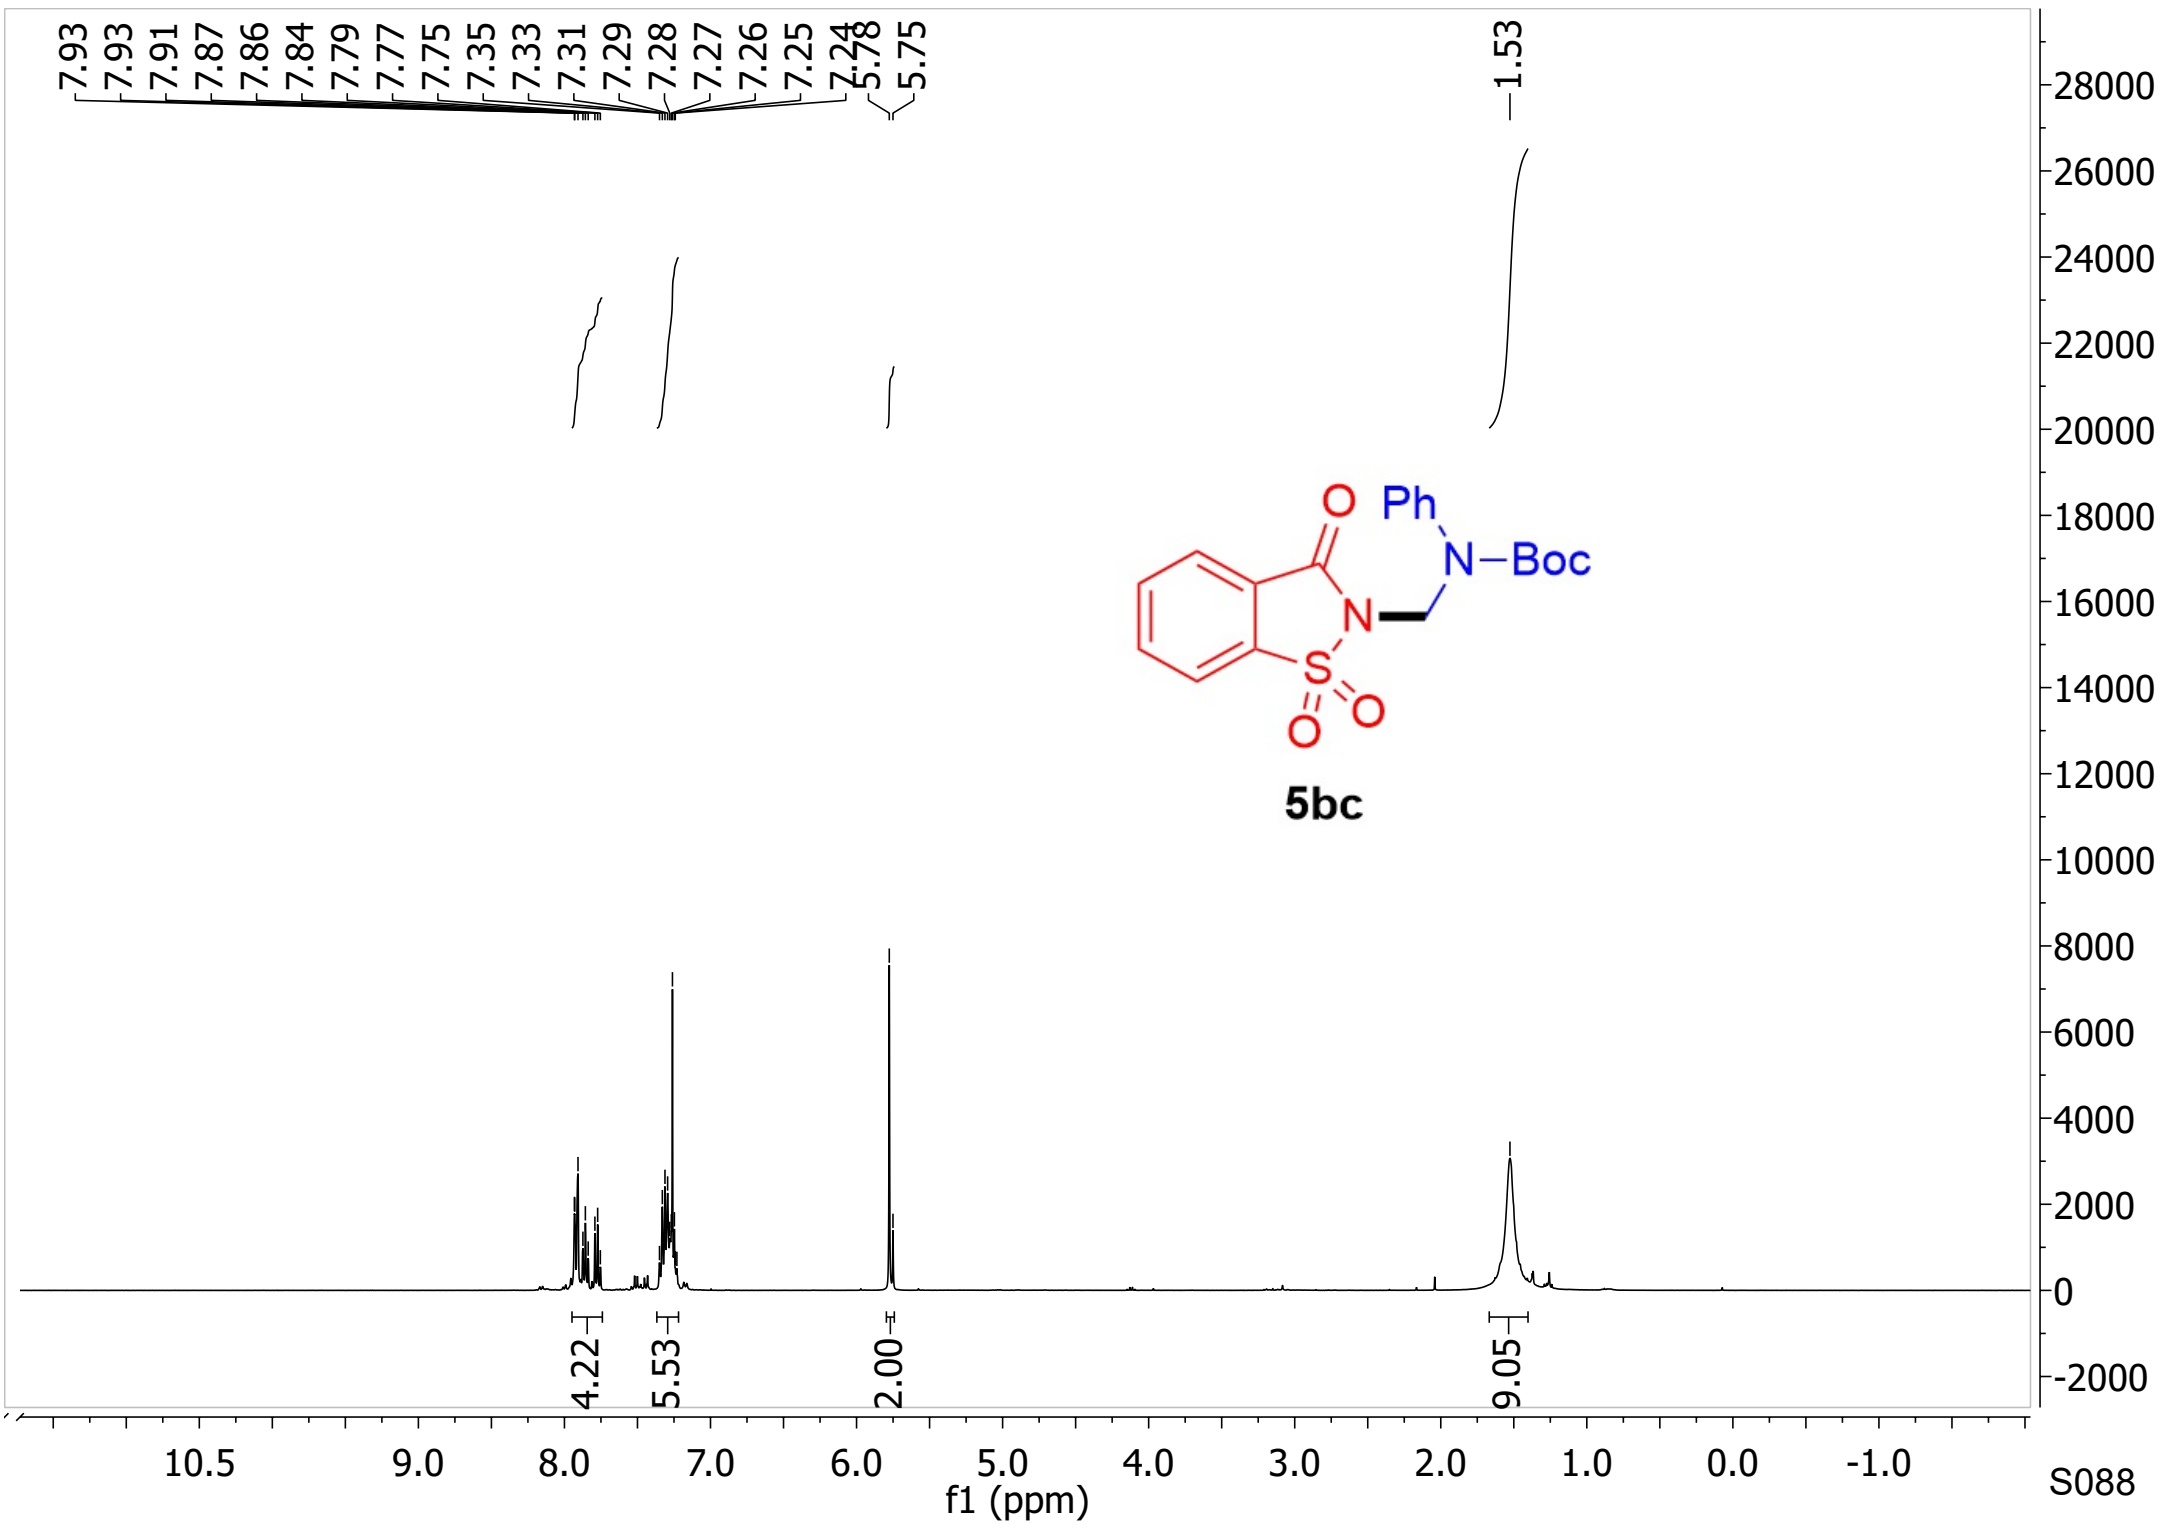

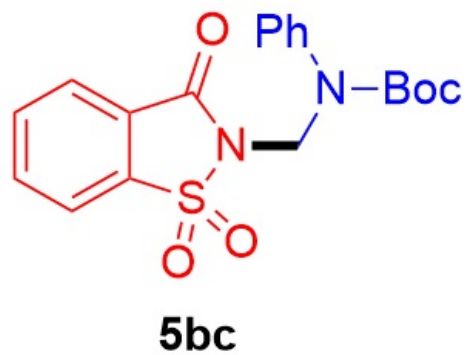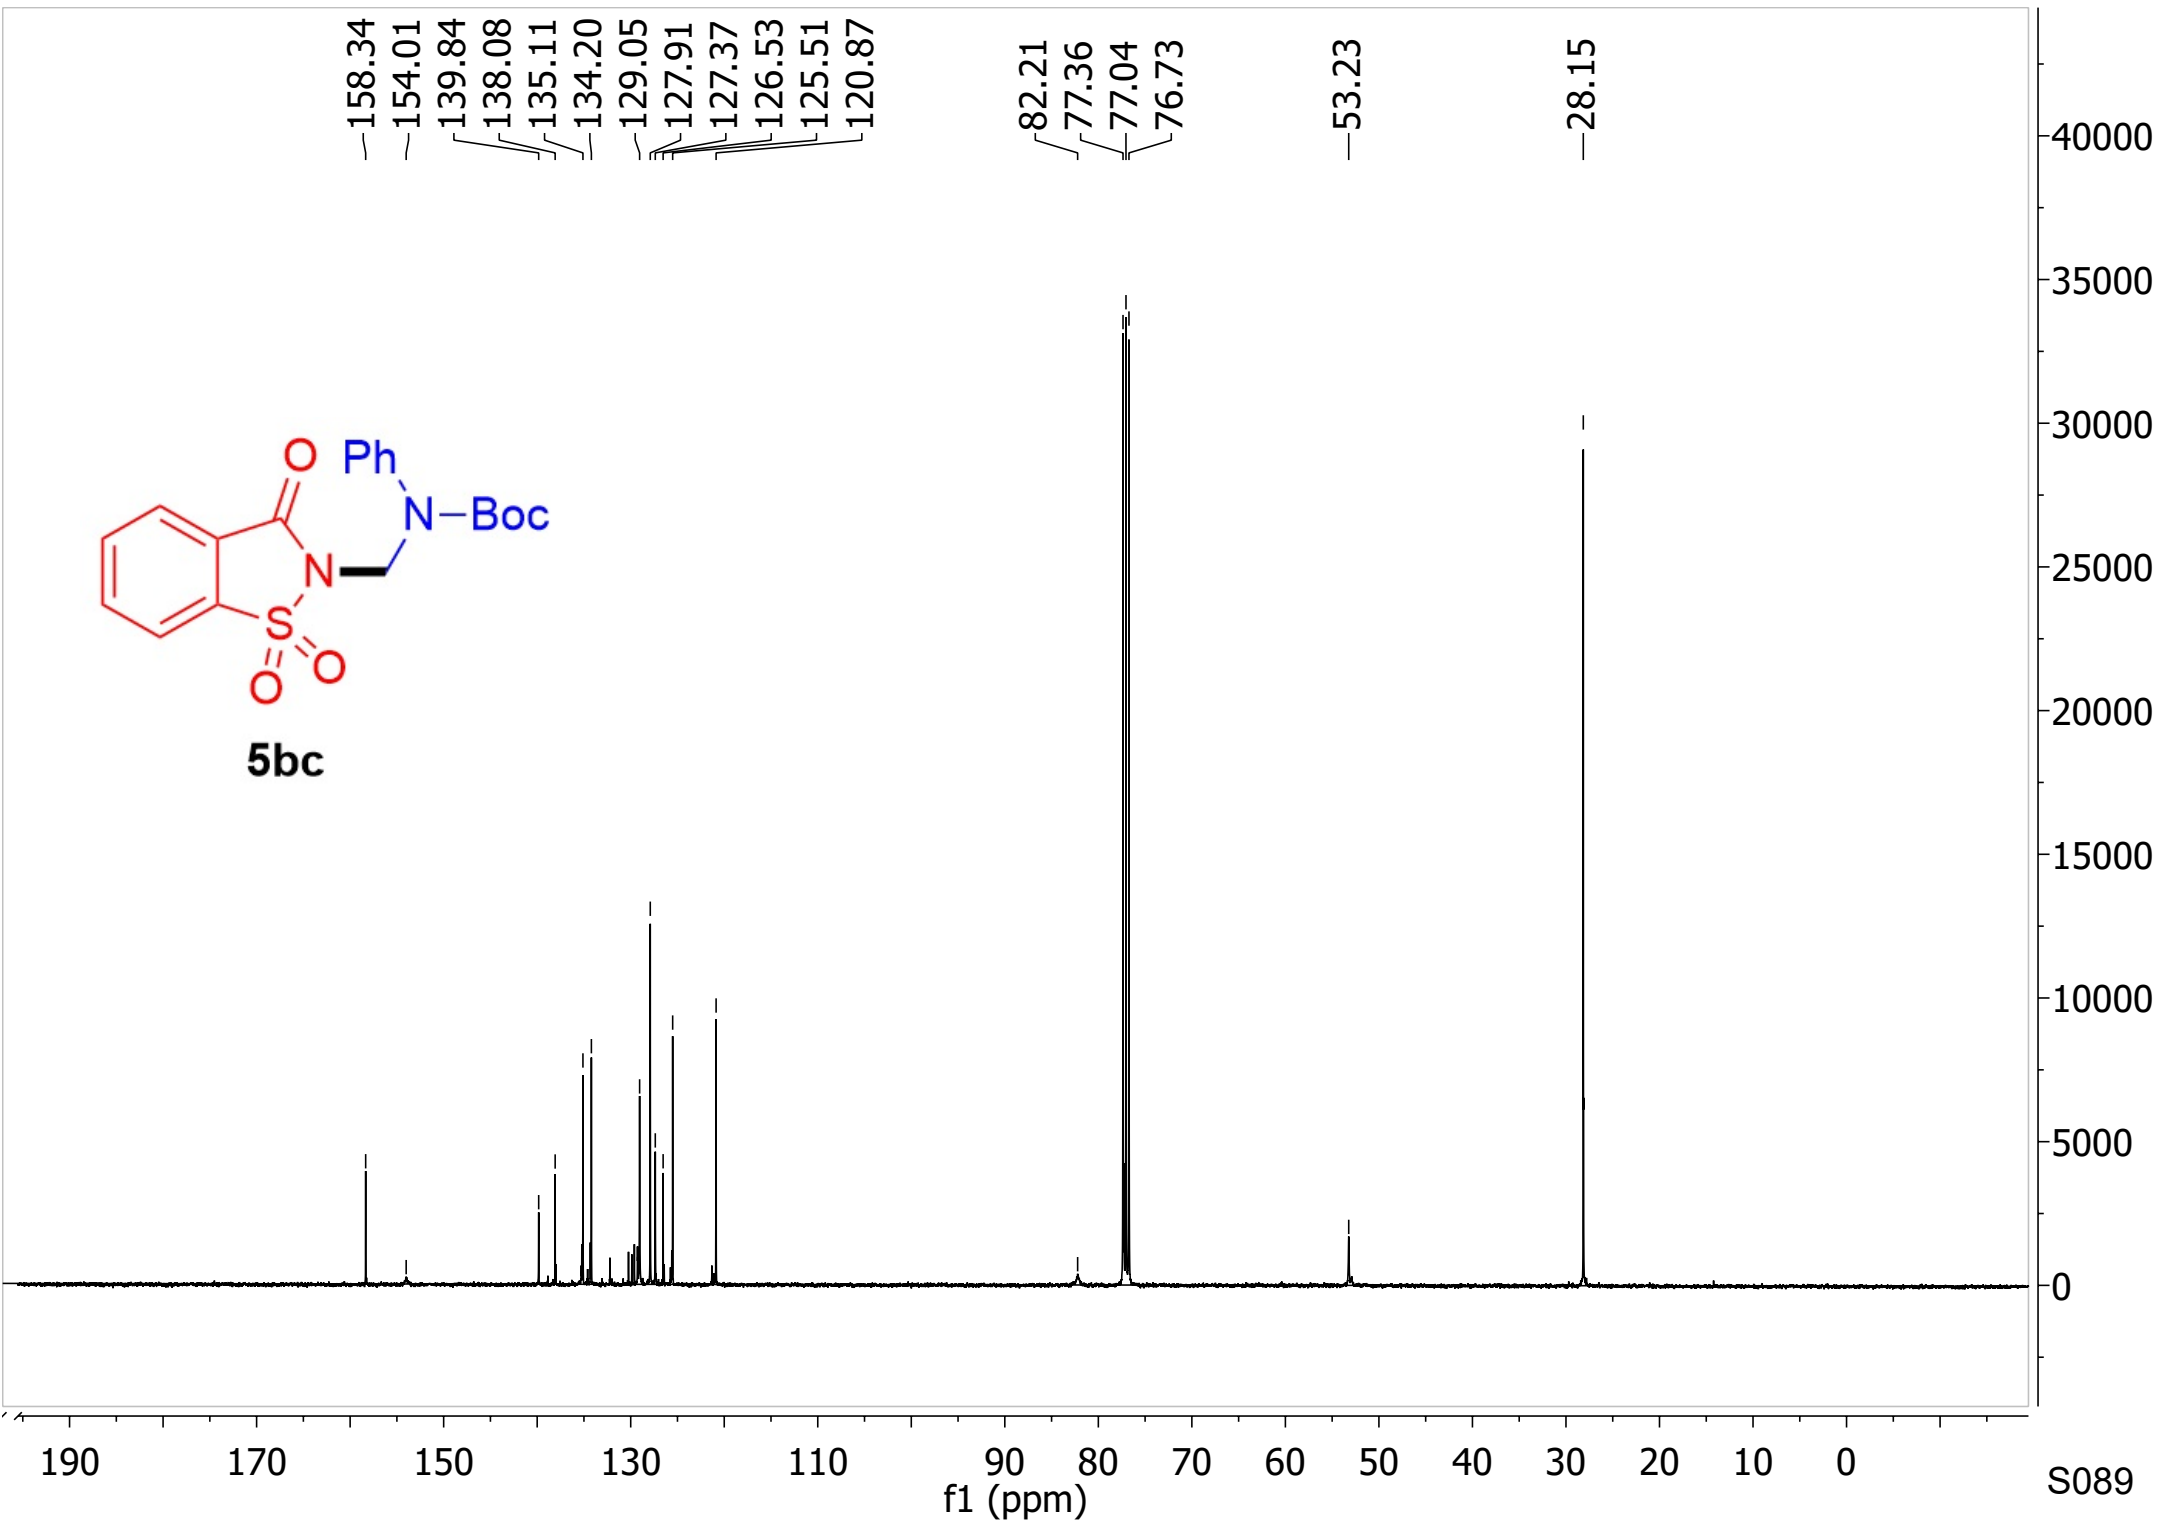

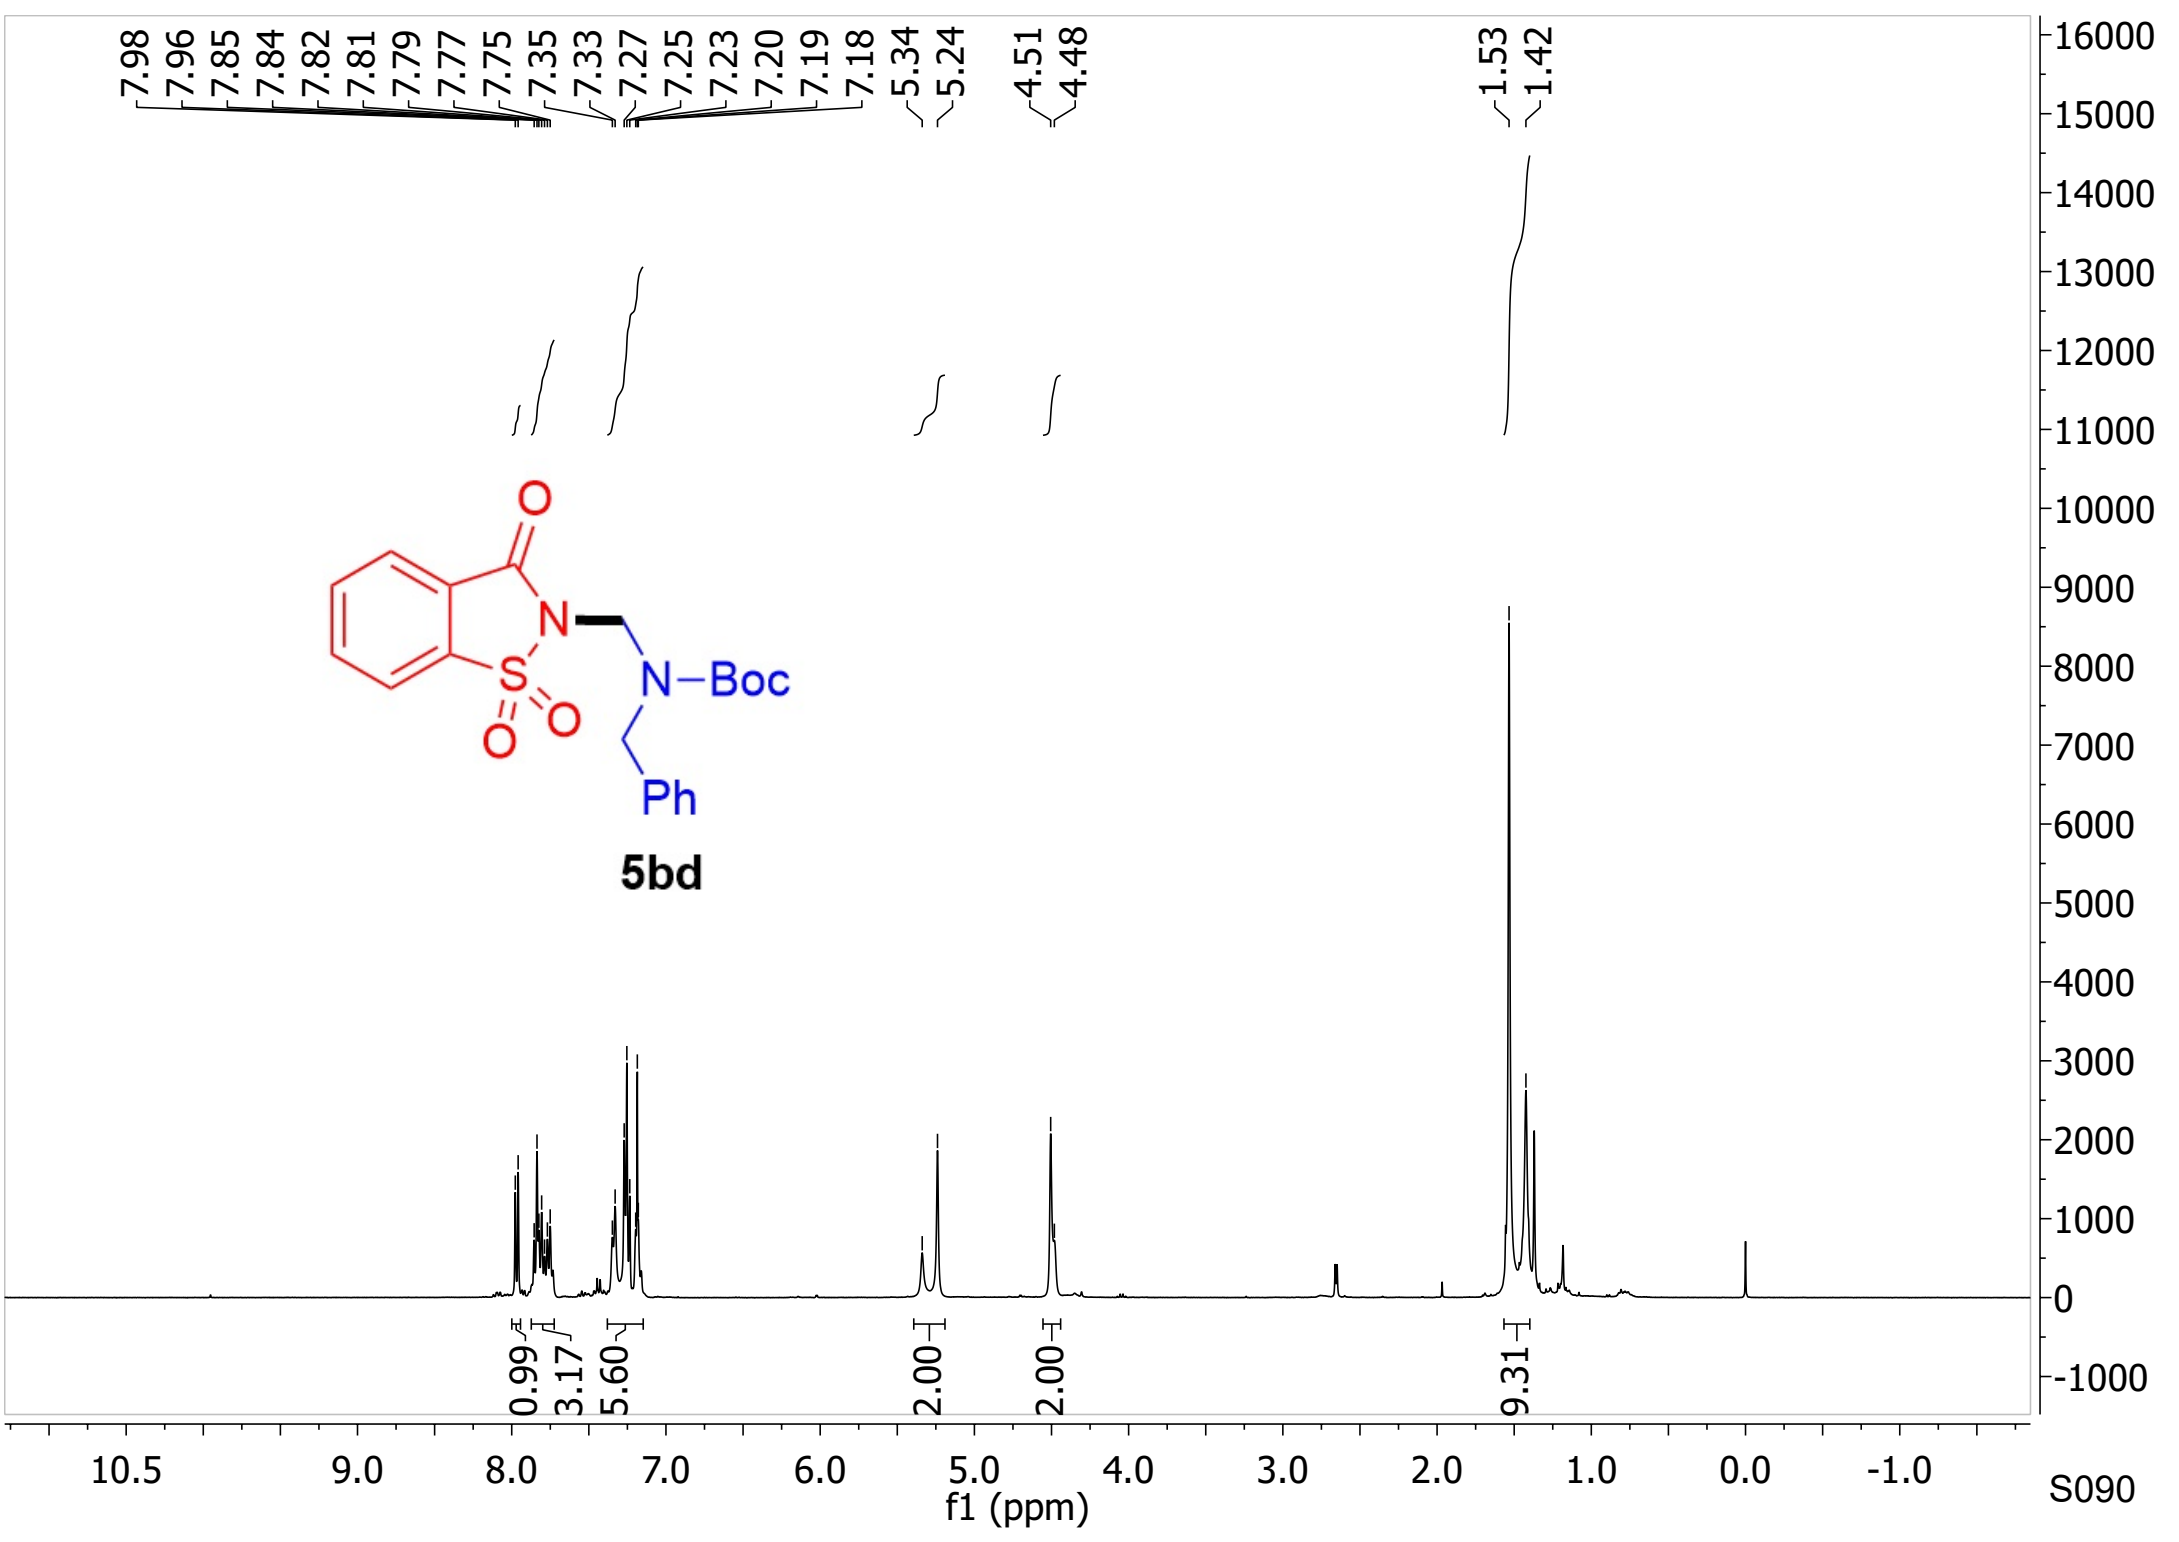

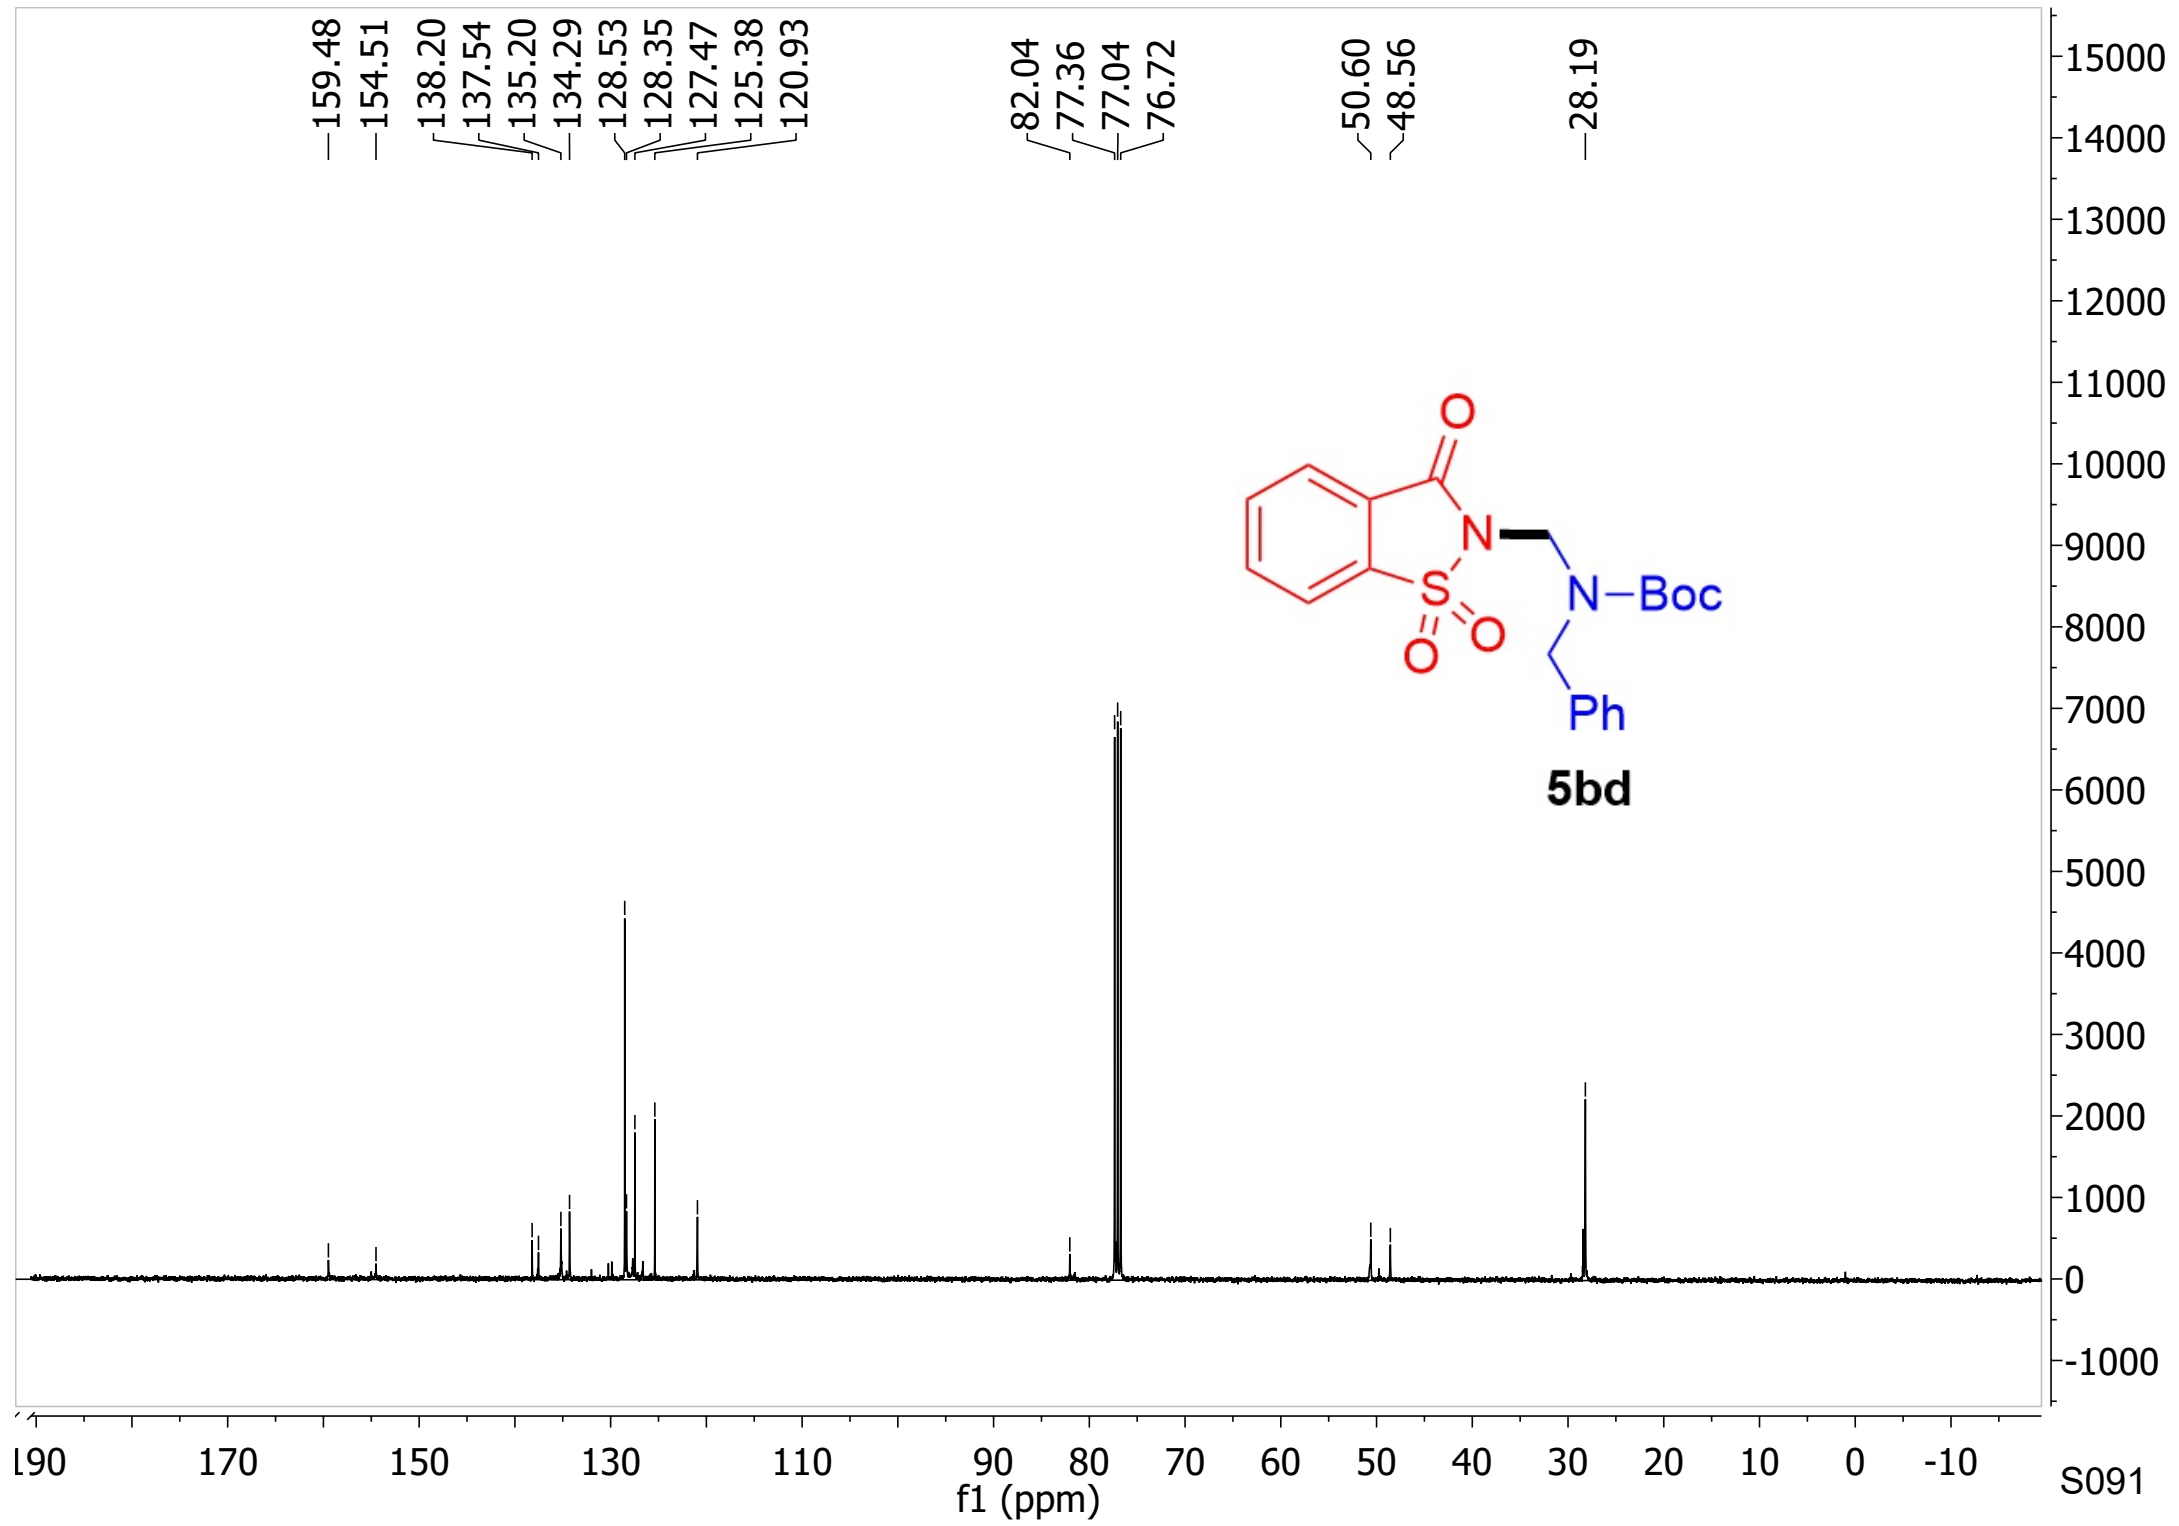



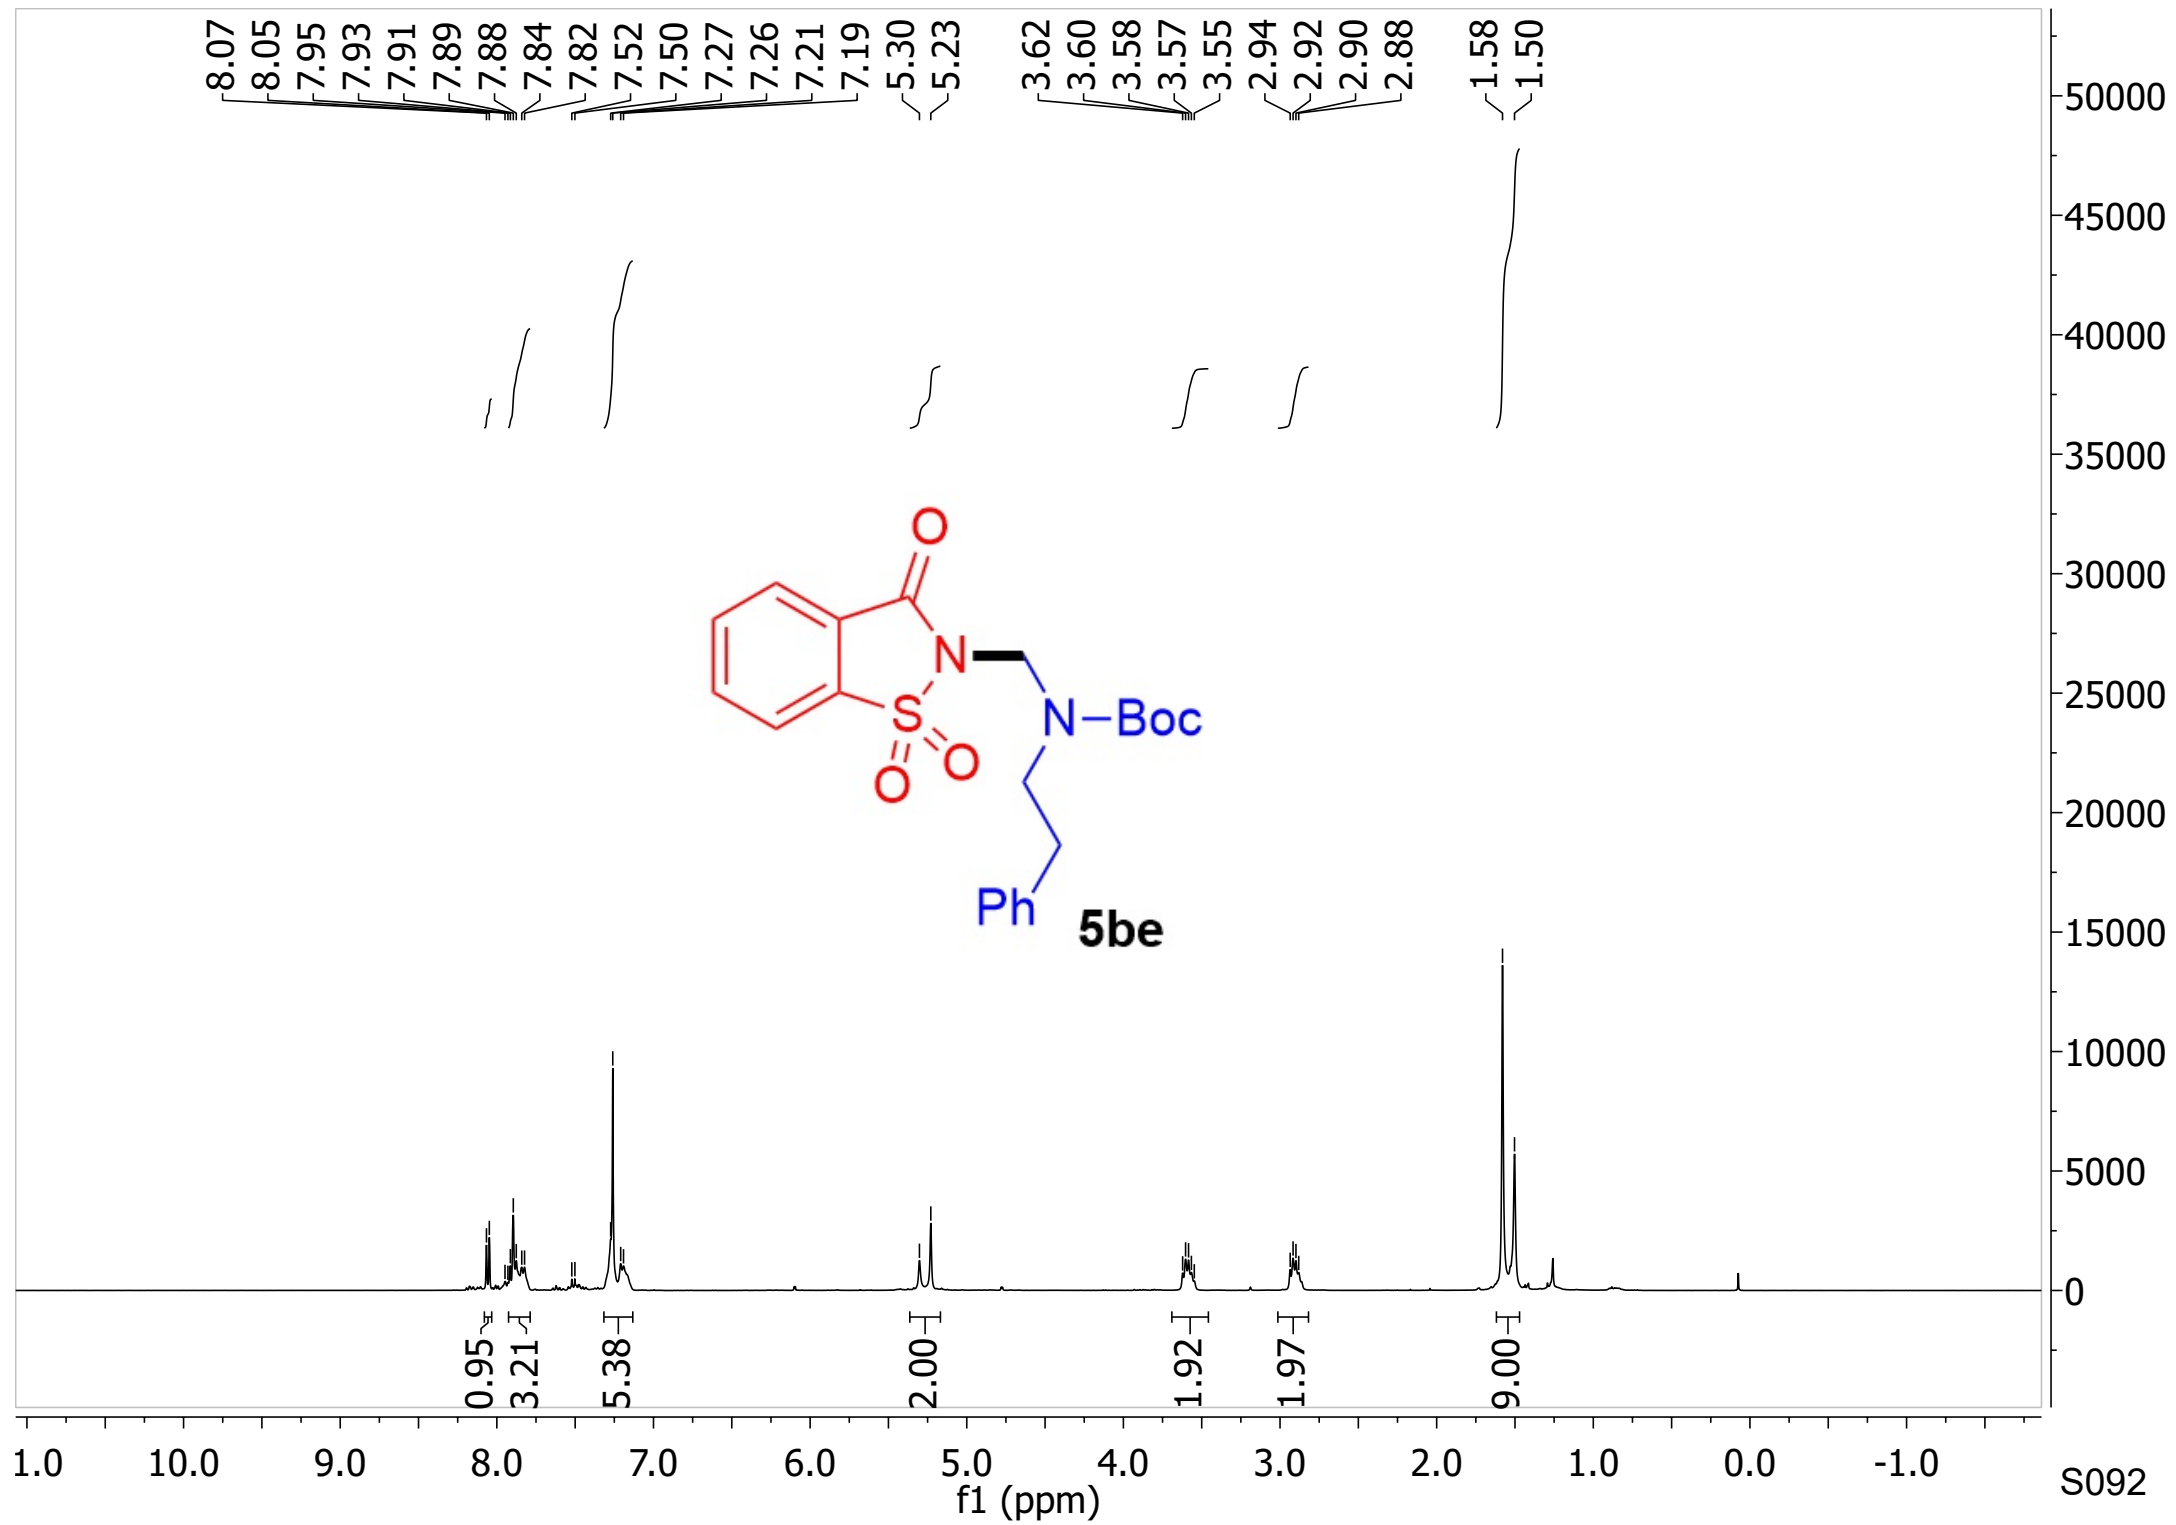

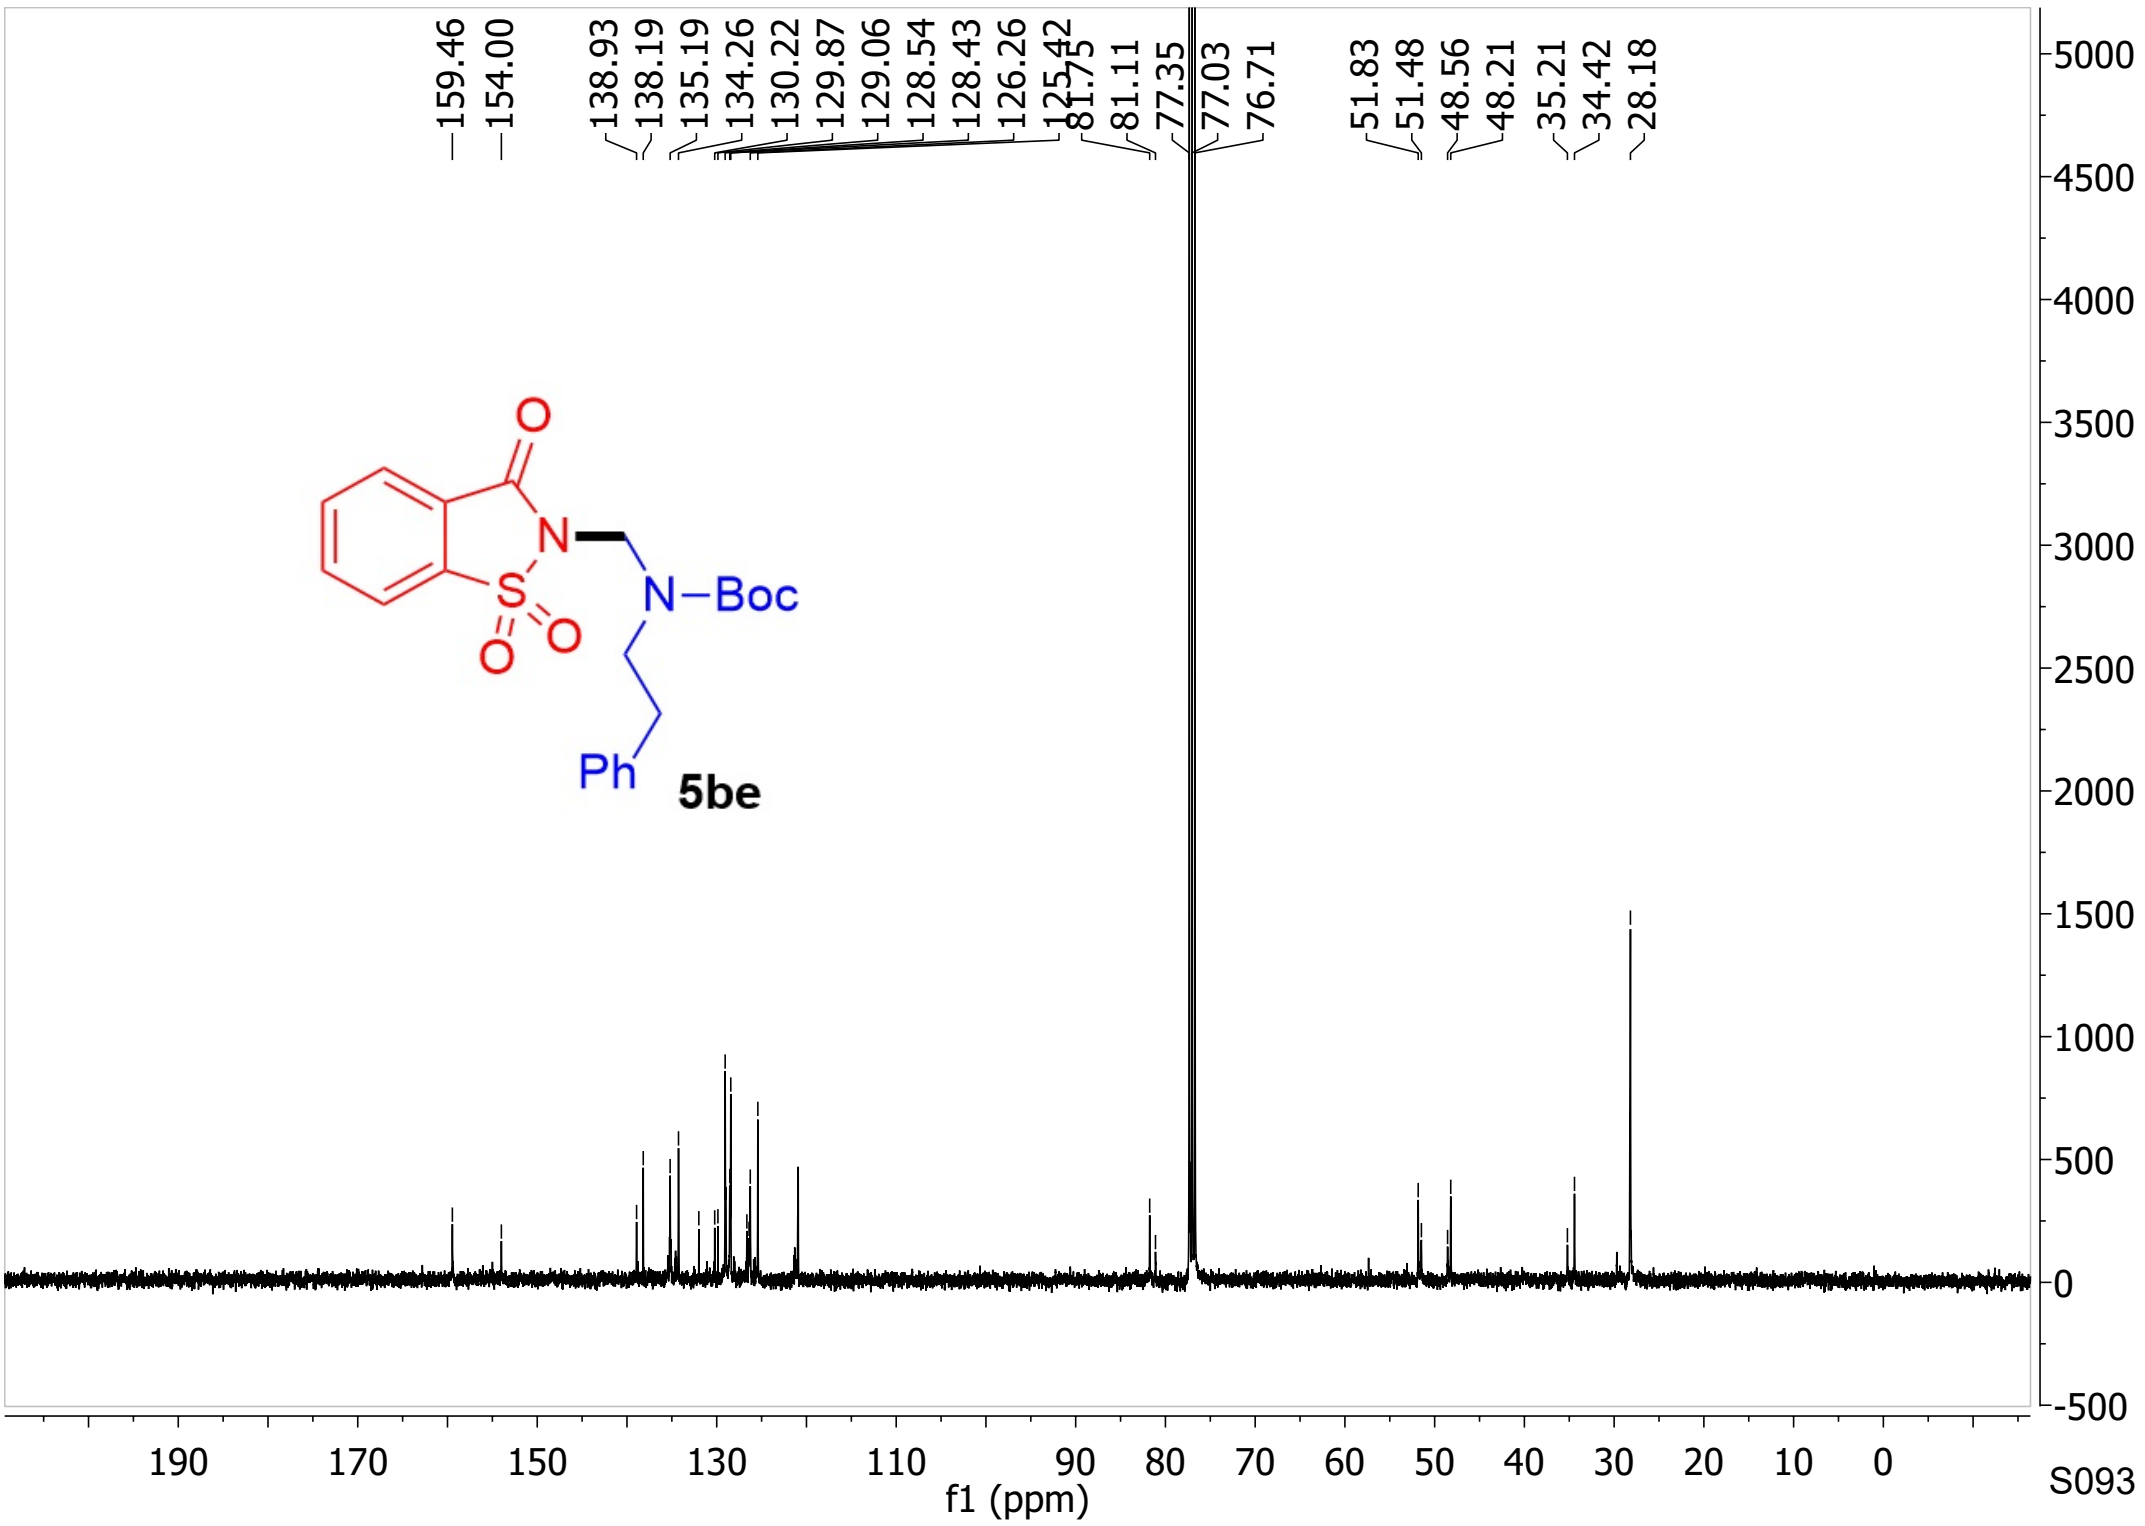

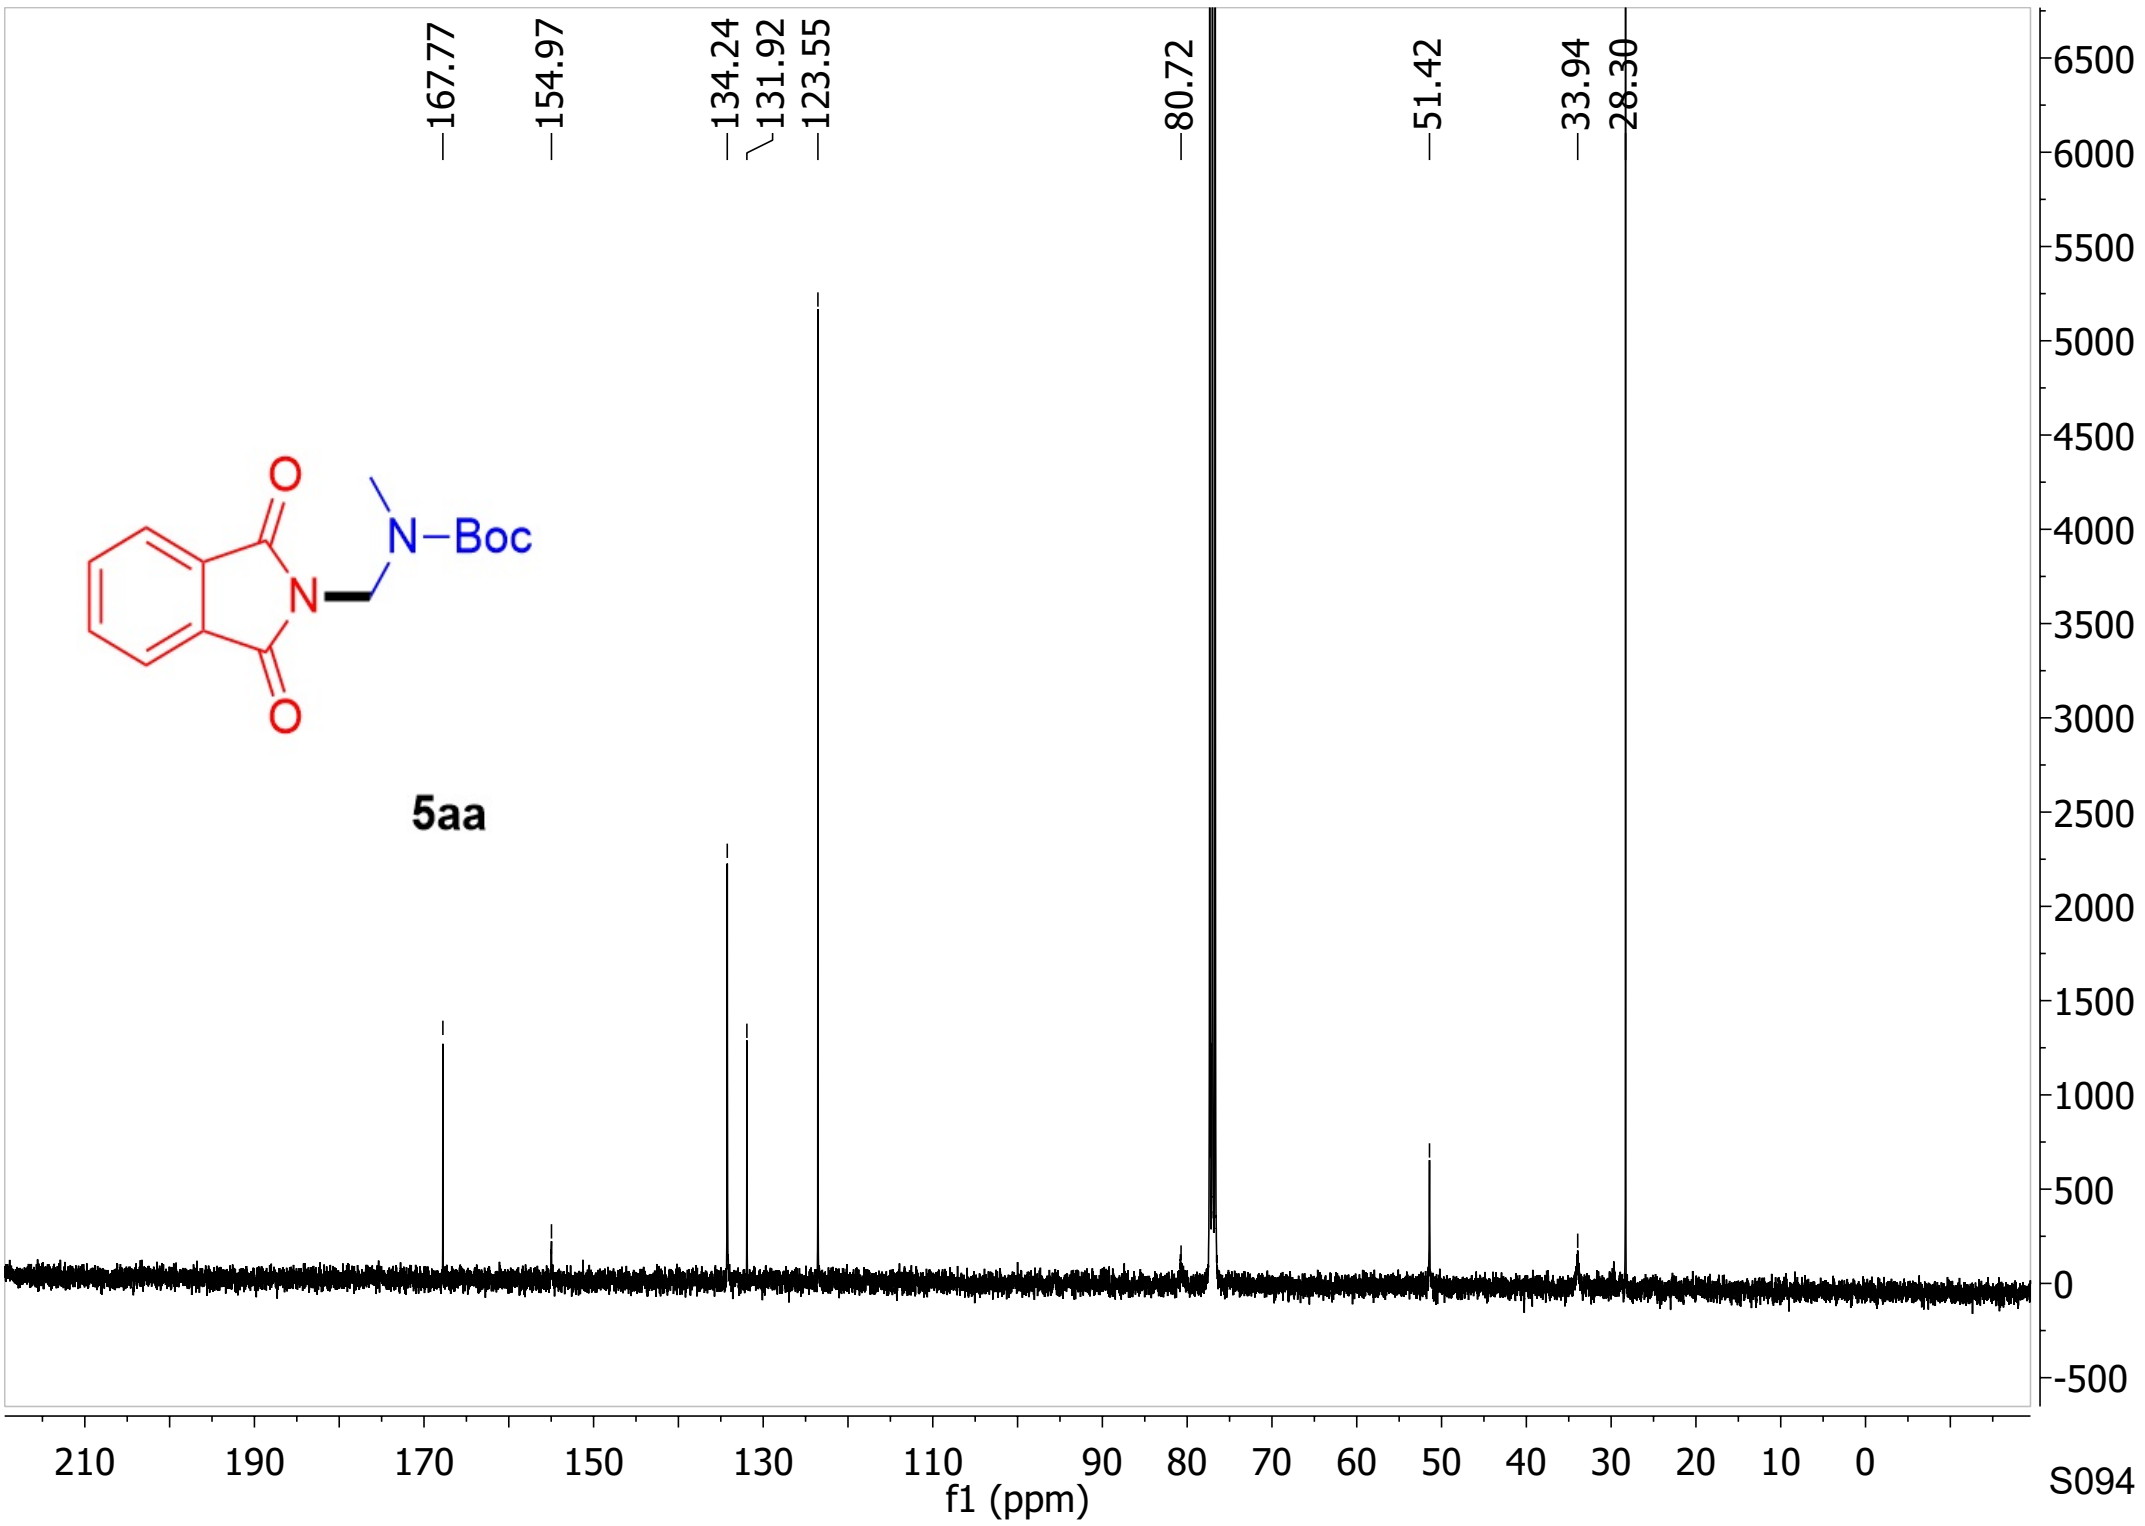

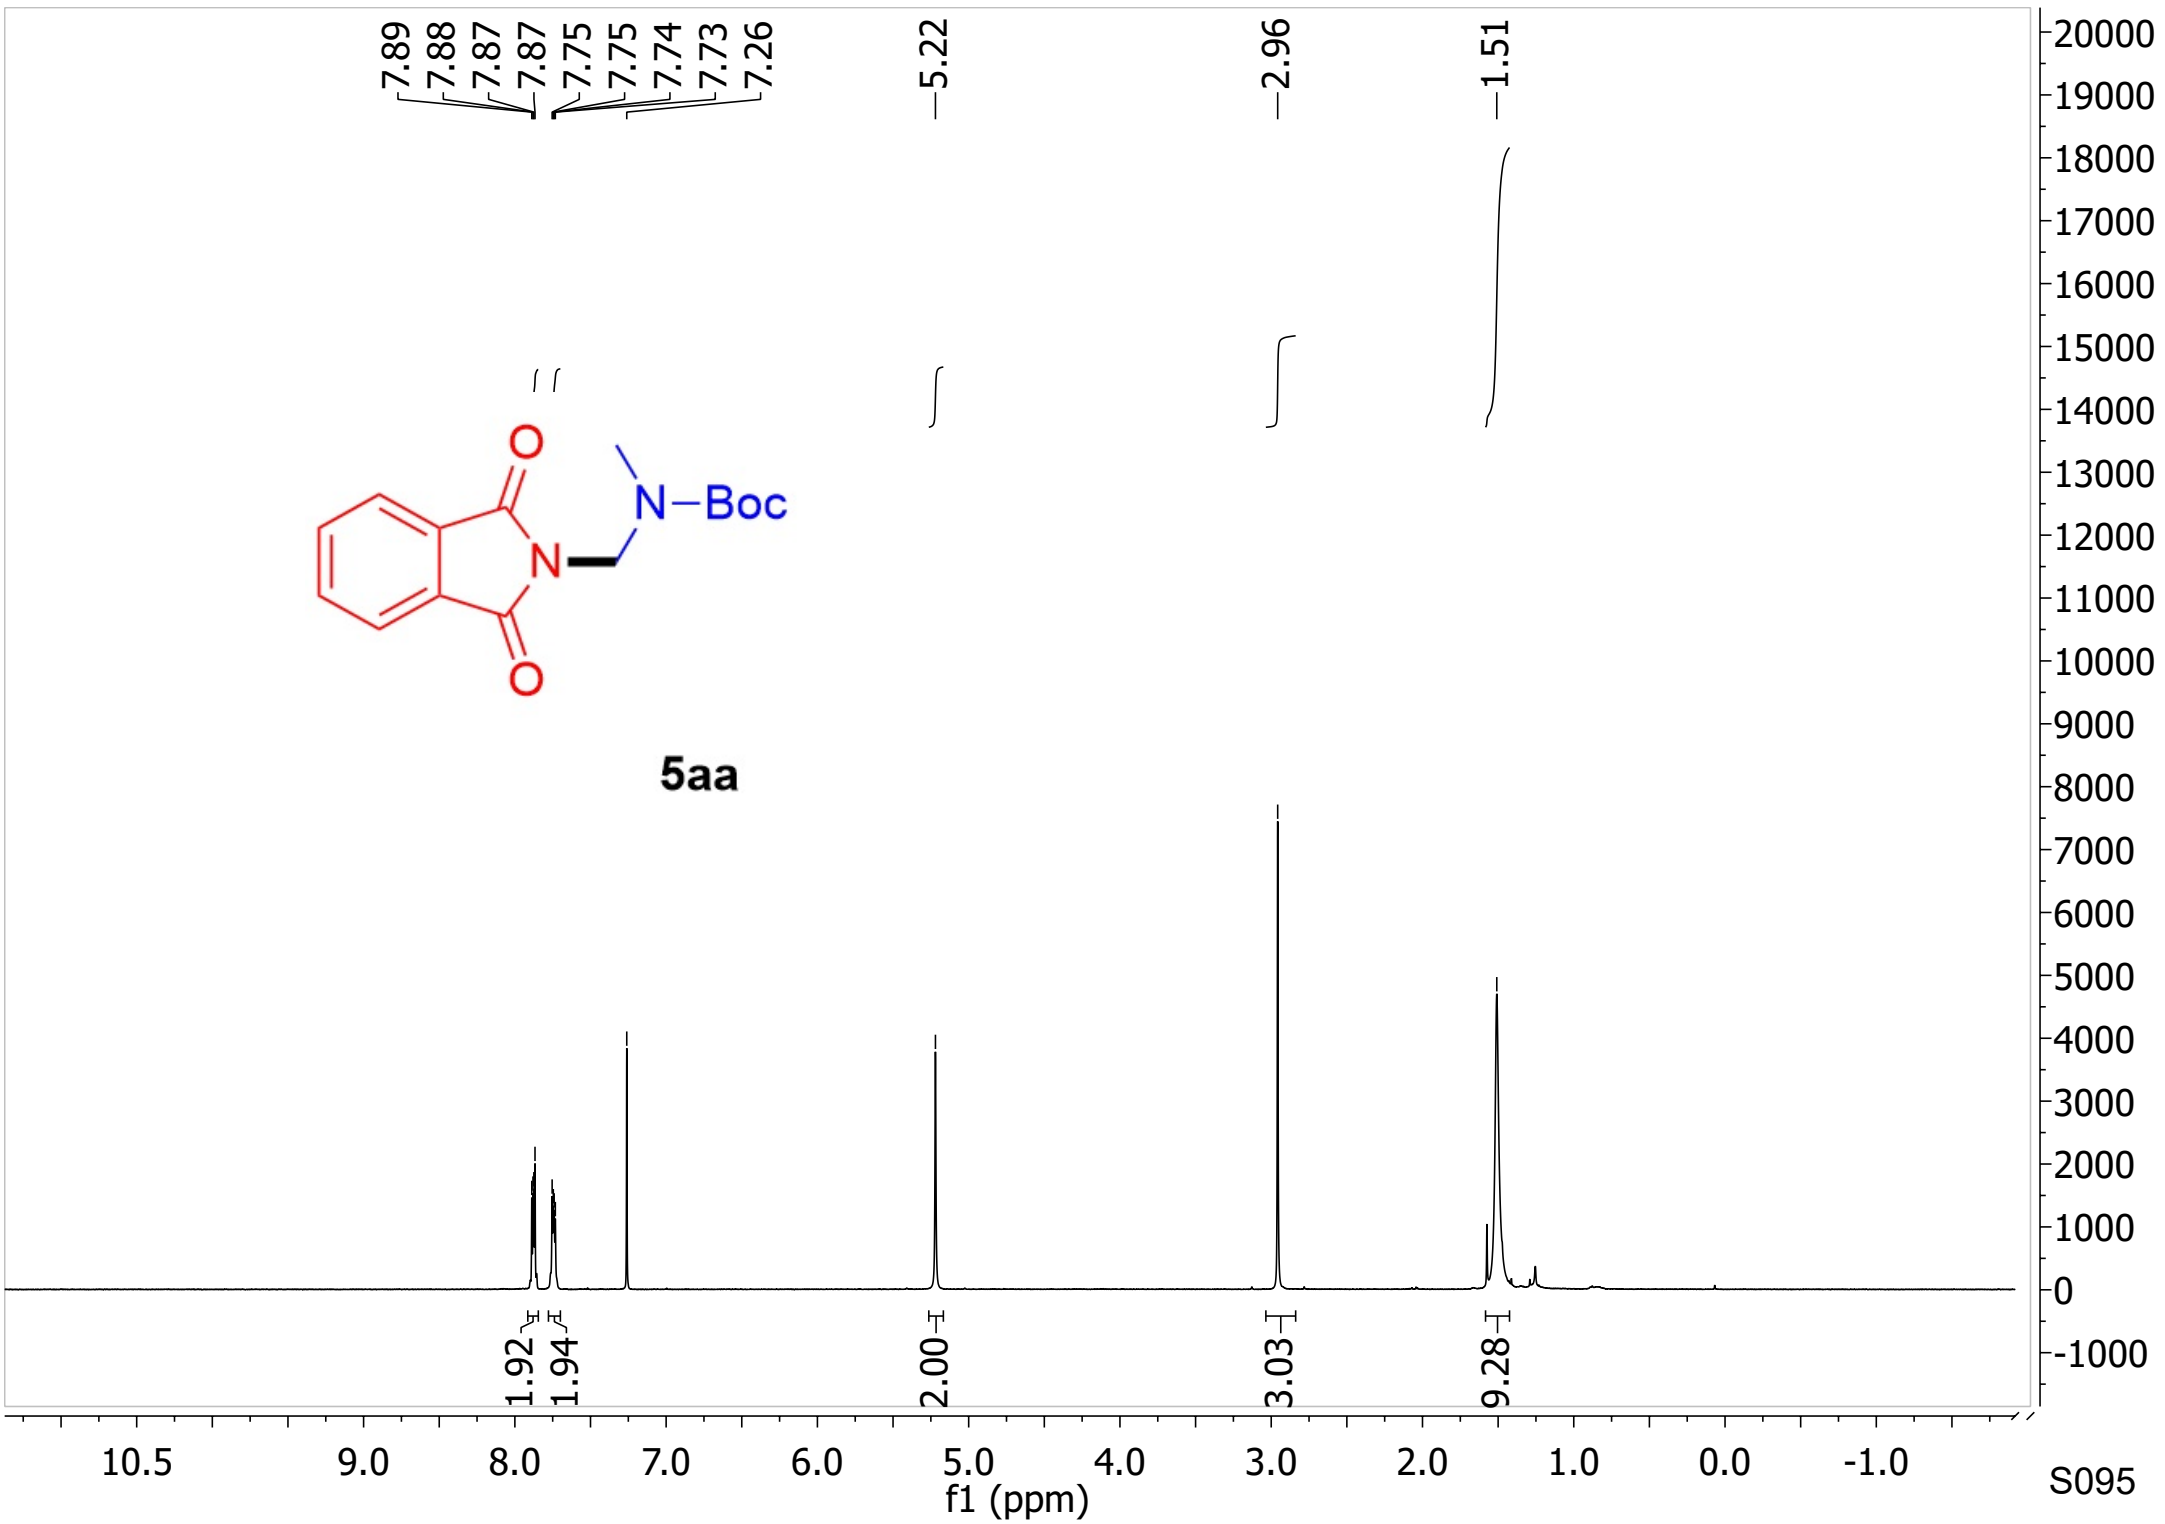

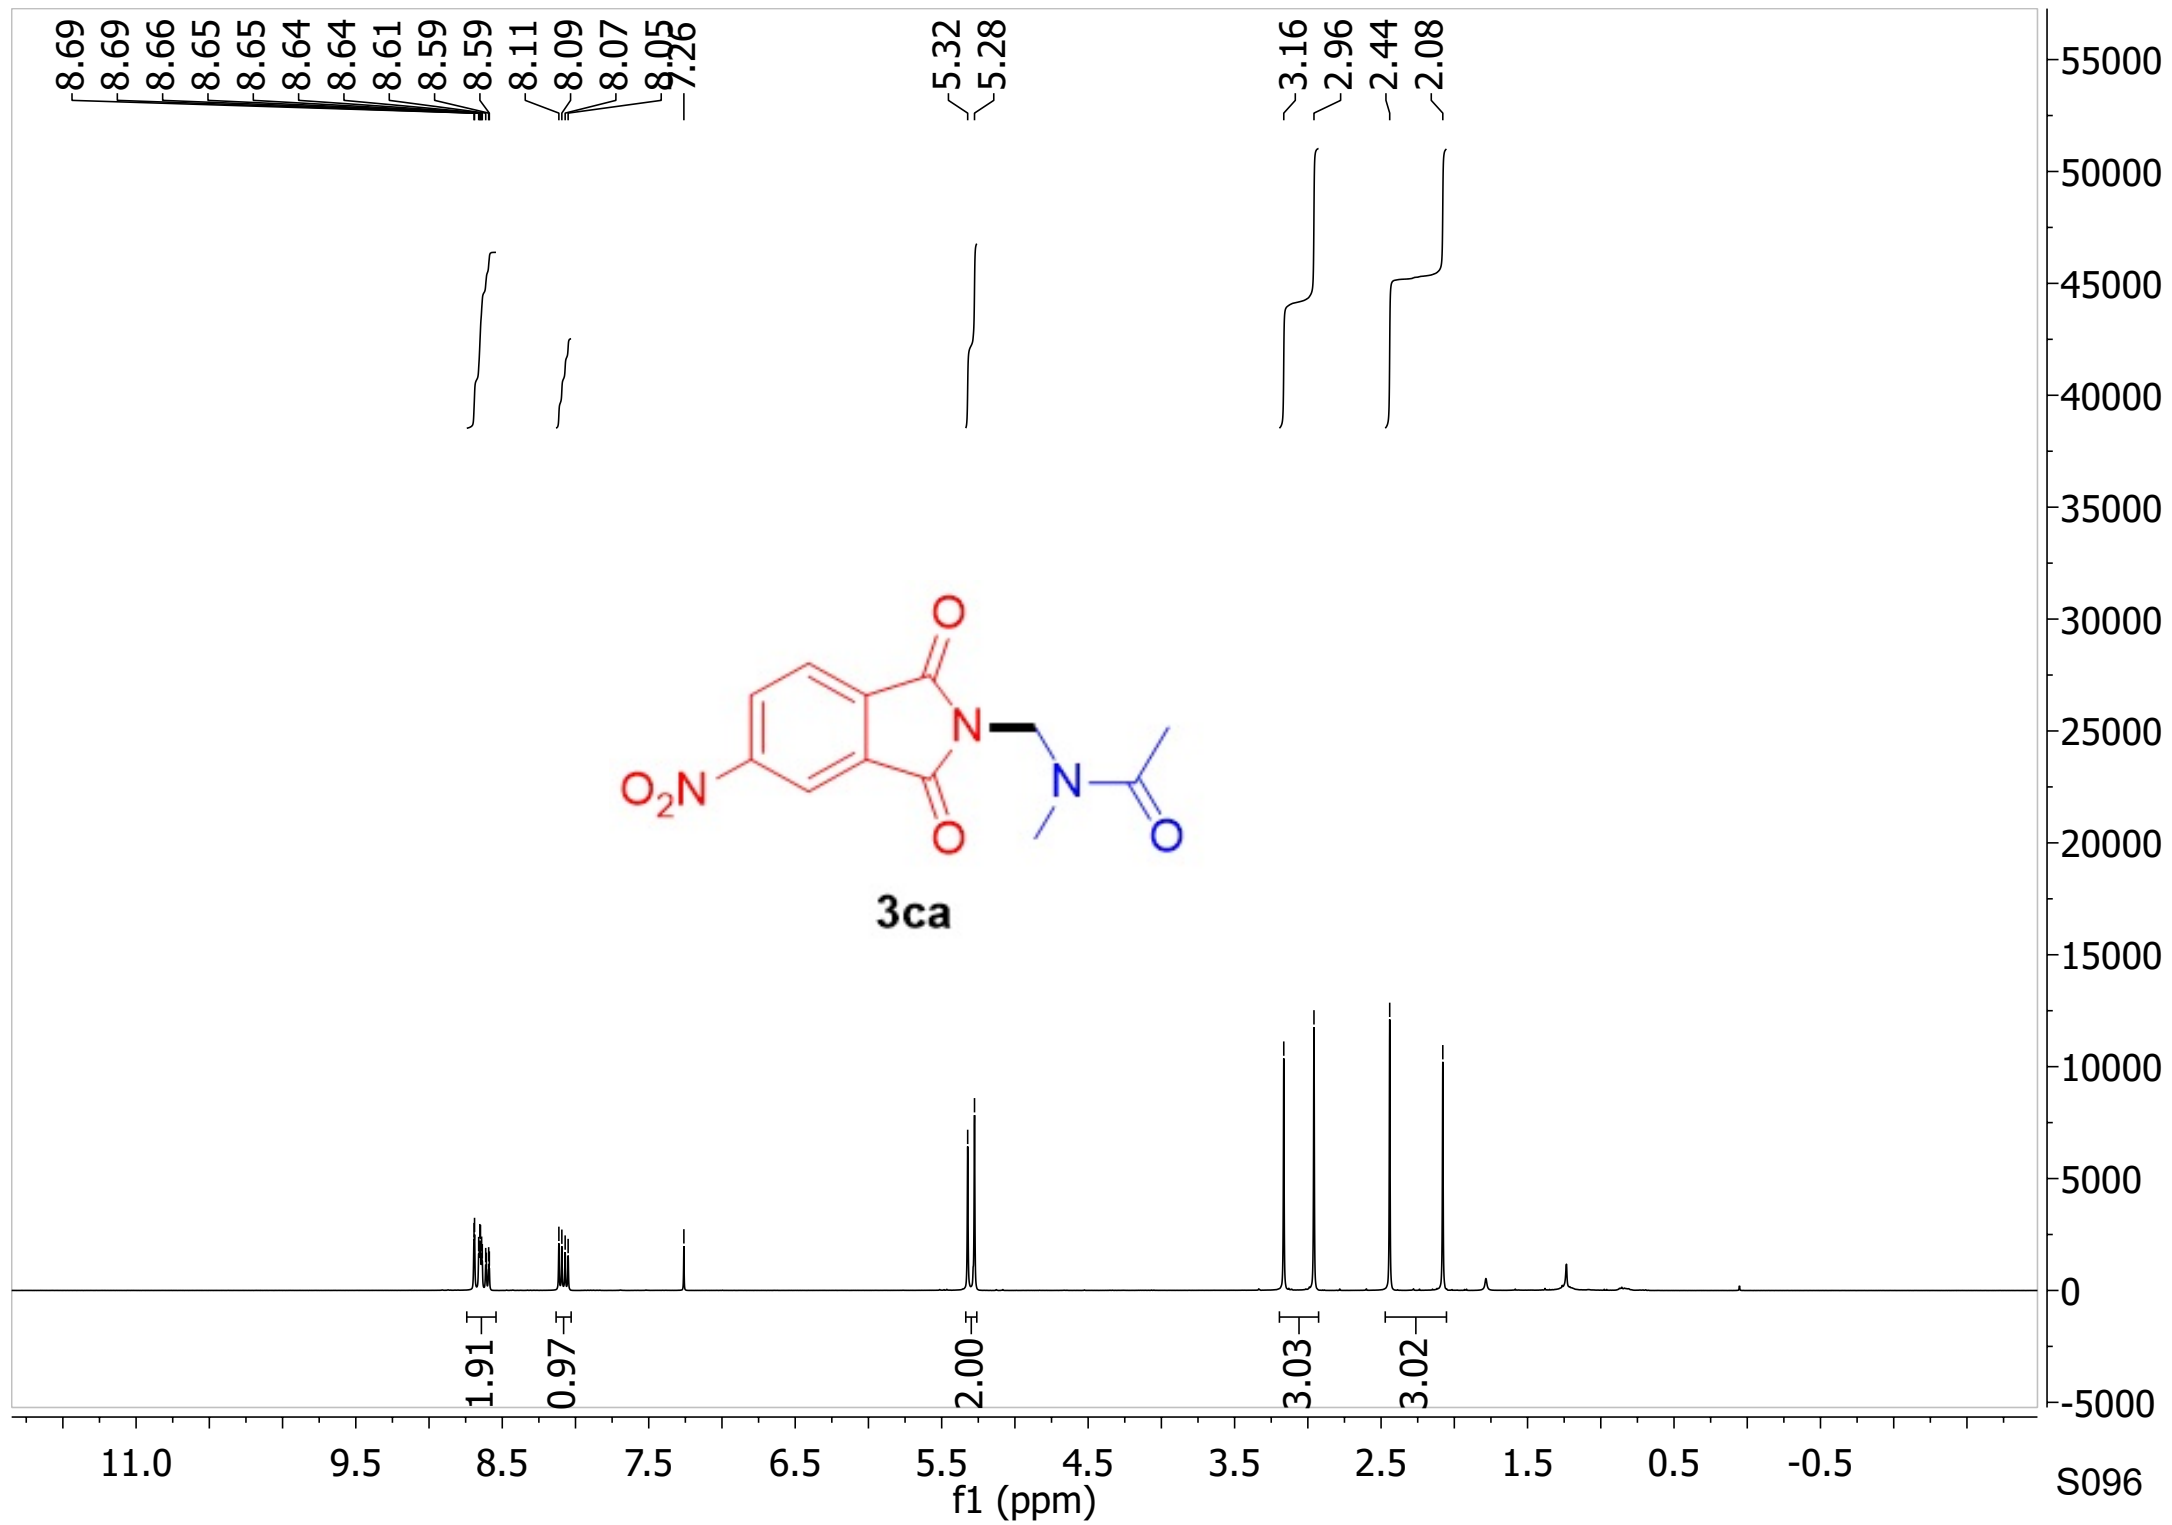

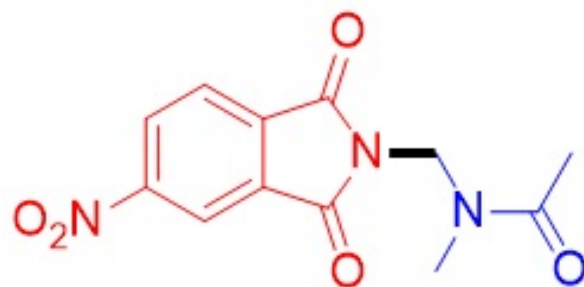

3ca

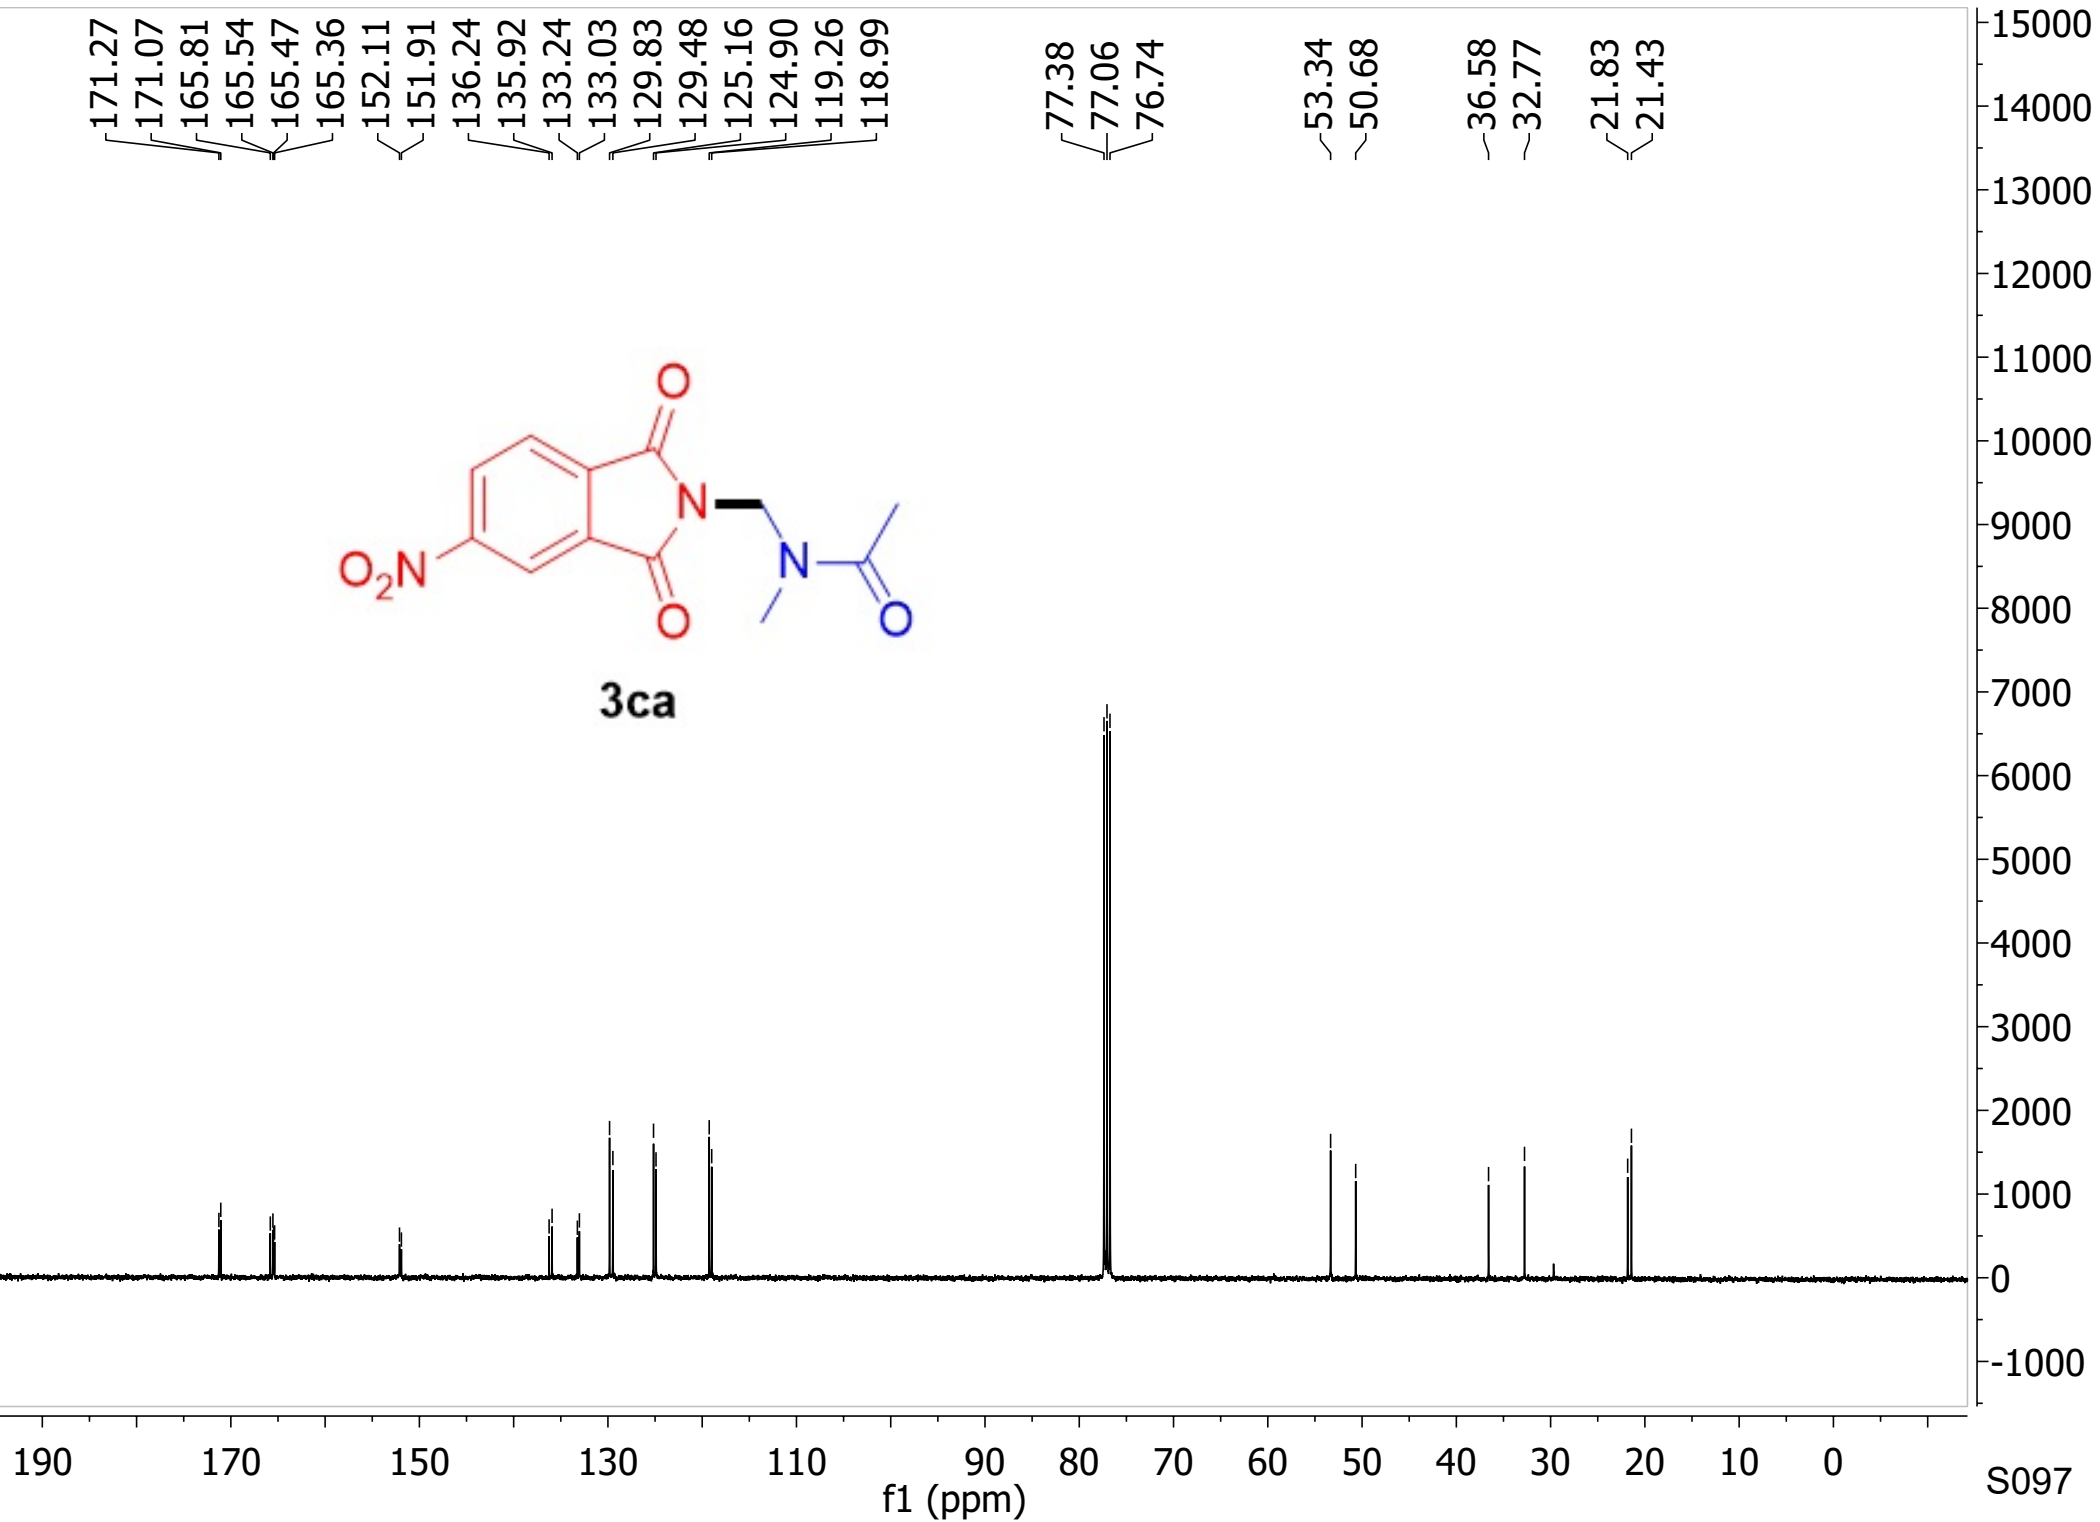

## Computational Methods

The optimization of the reactants, products, intermediates and transition states was performed at the density functional theory level using the program suite Gaussian 09.<sup>1</sup> The B3LYP method<sup>2</sup> was employed for all calculations along with the 6-311+G(d,p) basis set for all atoms with the exception of Br, which was treated with the MWB28 relativistic Stuttgart-Dresden pseudopotential. The lithium counter ion was not taken into account in the calculations. The gradient threshold used for all geometry optimization was  $4.5 \times 10^{-4}$  Hartree/Bohr. The implicit solvation method employed for all calculations was the polarizable conductor calculation model (CPCM).<sup>3,4</sup> Frequency calculations were conducted to determine if each optimization was a minimum (reactants, products and intermediates) or a maximum (transition states) in the potential energy surface. Furthermore, each transition state was confirmed via intrinsic reaction coordinate (IRC) calculations. The excited state properties of the Br-phthalimide-LiOtBu adduct were obtained with the time-dependent density functional (TD-DFT) formalism.<sup>5,6</sup> The activation free energy for the single electron transfer (SET) was calculated through Marcus-Hush theory with equation S1,<sup>7</sup>

$$\Delta G_{SET}^{\ddagger} = \frac{\lambda}{4} \left( 1 + \frac{\Delta G_{rel}}{\lambda} \right)^2 \quad (\text{eq. S1})$$

where  $\Delta G_{rel}$  is the relative difference in free energies of the SET step and  $\lambda$  refers to the reorganization energy.

## References

1. M. J. Frisch, G. W. Trucks, H. B. Schlegel, G. E. Scuseria, M. A. Robb, J. R. Cheeseman, G. Scalmani, V. Barone, B. Mennucci, G. A. Petersson, H. Nakatsuji, M. Caricato, X. Li, H. P. Hratchian, A. F. Izmaylov, J. Bloino, G. Zheng, J. L. Sonnenberg, M. Hada, M. Ehara, K. Toyota, R. Fukuda, J. Hasegawa, M. Ishida, T. Nakajima, Y. Honda, O. Kitao, H. Nakai, T. Vreven, J. A. Montgomery Jr., J. E. Peralta, F. Ogliaro, M. Bearpark, J. J. Heyd, E. Brothers, K. N. Kudin, V. N. Staroverov, R. Kobayashi, J. Normand, K. Raghavachari, A. Rendell, J. C. Burant, S. S. Iyengar, J. Tomasi, M. Cossi, N. Rega, J. M. Millam, M. Klene, J. E. Knox, J. B. Cross, V. Bakken, C. Adamo, J. Jaramillo, R. Gomperts, R. E. Stratmann, O. Yazyev, A. J. Austin, R. Cammi, C. Pomelli, J. W. Ochterski, R. L. Martin, K. Morokuma, V. G. Zakrzewski, G. A. Voth, P. Salvador, J. J. Dannenberg, S. Dapprich, A. D. Daniels, Ö. Farkas, J. B. Foresman, J. V. Ortiz, J. Cioslowski and D. J. Fox, Gaussian 09 Revision E.01. Gaussian Inc. Wallingford CT 2009.
2. A. D. Becke, *J. Chem. Phys.*, 1993, **98**, 5648-5652.; C. Lee, W. Yang and R. G. Parr, *Phys. Rev. B*, 1988, **37**, 785-789.
3. V. Barone and M. Cossi, *J. Phys. Chem. A*, 1998, **102**, 1995-2001.
4. M. Cossi, N. Rega, G. Scalmani and V. Barone, *J. Comput. Chem.*, 2003, **24**, 669-681.
5. G. Scalmani, M. J. Frisch, B. Mennucci, J. Tomaso, R. Cammi, V. Barone, *J. Phys. Chem.*, 2006, **124**, 094107:1-15.
6. A. D. Laurent, C. Adamo, D. Jacquemin, *Phys. Chem. Chem. Phys.*, 2014, **16**, 14334-14356.
7. C. Adouama, M. E. Budén, W. D. Guerra, M. Puiatti, B. Joseph, S. M. Barolo, R. A. Rossi, M. Médebielle, *Org. Lett.*, 2019, **21**, 320-324.

**Computational Data**  
**Cartesian coordinates**  
*N*-bromophthalimide

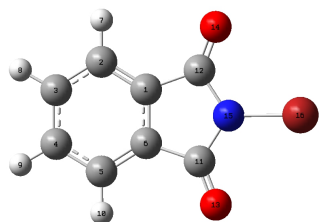

| Center Number | Atomic Number | Atomic Type | Coordinates (Angstroms) |           |           |
|---------------|---------------|-------------|-------------------------|-----------|-----------|
|               |               |             | X                       | Y         | Z         |
| 1             | 6             | 0           | -0.000116               | 1.388291  | 0.698062  |
| 2             | 6             | 0           | 0.000079                | 2.568095  | 1.422786  |
| 3             | 6             | 0           | 0.000297                | 3.766652  | 0.698758  |
| 4             | 6             | 0           | 0.000297                | 3.766652  | -0.698758 |
| 5             | 6             | 0           | 0.000079                | 2.568095  | -1.422786 |
| 6             | 6             | 0           | -0.000116               | 1.388291  | -0.698062 |
| 7             | 1             | 0           | 0.000094                | 2.563320  | 2.505628  |
| 8             | 1             | 0           | 0.000495                | 4.710635  | 1.230453  |
| 9             | 1             | 0           | 0.000495                | 4.710635  | -1.230453 |
| 10            | 1             | 0           | 0.000094                | 2.563320  | -2.505628 |
| 11            | 6             | 0           | -0.000367               | -0.022389 | -1.181666 |
| 12            | 6             | 0           | -0.000367               | -0.022389 | 1.181666  |
| 13            | 8             | 0           | -0.000141               | -0.452973 | -2.307655 |
| 14            | 8             | 0           | -0.000141               | -0.452973 | 2.307655  |
| 15            | 7             | 0           | -0.001039               | -0.792835 | 0.000000  |
| 16            | 35            | 0           | 0.000276                | -2.690236 | 0.000000  |

Zero-point correction= 0.104357 (Hartree/Particle)  
 Thermal correction to Energy= 0.113865  
 Thermal correction to Enthalpy= 0.114810  
 Thermal correction to Gibbs Free Energy= 0.067932  
 Sum of electronic and zero-point Energies= -525.867773  
 Sum of electronic and thermal Energies= -525.858265  
 Sum of electronic and thermal Enthalpies= -525.857321  
 Sum of electronic and thermal Free Energies= -525.904199



### *N,N*-dimethylacetamide

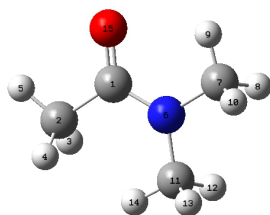

---

| Center<br>Number | Atomic<br>Number | Atomic<br>Type | Coordinates (Angstroms) |           |           |
|------------------|------------------|----------------|-------------------------|-----------|-----------|
|                  |                  |                | X                       | Y         | Z         |
| 1                | 6                | 0              | -0.723894               | -0.291345 | -0.000089 |
| 2                | 6                | 0              | -1.774516               | 0.806918  | -0.000110 |
| 3                | 1                | 0              | -1.692941               | 1.444551  | 0.883495  |
| 4                | 1                | 0              | -1.693003               | 1.444543  | -0.883722 |
| 5                | 1                | 0              | -2.751956               | 0.329288  | -0.000065 |
| 6                | 7                | 0              | 0.587769                | 0.078553  | -0.000732 |
| 7                | 6                | 0              | 1.634749                | -0.937685 | -0.000046 |
| 8                | 1                | 0              | 2.264017                | -0.830604 | 0.889298  |
| 9                | 1                | 0              | 1.177741                | -1.922938 | -0.002441 |
| 10               | 1                | 0              | 2.267500                | -0.827776 | -0.886520 |
| 11               | 6                | 0              | 1.069770                | 1.454748  | 0.000341  |
| 12               | 1                | 0              | 1.683170                | 1.638042  | 0.888690  |
| 13               | 1                | 0              | 1.687802                | 1.637417  | -0.884874 |
| 14               | 1                | 0              | 0.248576                | 2.164249  | -0.002137 |
| 15               | 8                | 0              | -1.067743               | -1.477807 | 0.000353  |

---

Zero-point correction= 0.129189 (Hartree/Particle)  
Thermal correction to Energy= 0.137153  
Thermal correction to Enthalpy= 0.138097  
Thermal correction to Gibbs Free Energy= 0.095417  
Sum of electronic and zero-point Energies= -287.797106  
Sum of electronic and thermal Energies= -287.789142  
Sum of electronic and thermal Enthalpies= -287.788197  
Sum of electronic and thermal Free Energies= -287.830877

Recommended a0 for SCRF calculation = 4.18 angstrom

*t*-butoxide anion

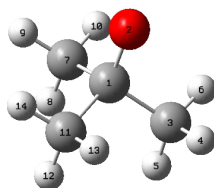

---

| Center Number | Atomic Number | Atomic Type | Coordinates (Angstroms) |           |           |
|---------------|---------------|-------------|-------------------------|-----------|-----------|
|               |               |             | X                       | Y         | Z         |
| 1             | 6             | 0           | -0.000030               | -0.000049 | 0.132247  |
| 2             | 8             | 0           | -0.000882               | 0.000187  | 1.504169  |
| 3             | 6             | 0           | 0.891635                | -1.145588 | -0.432979 |
| 4             | 1             | 0           | 0.520717                | -2.110769 | -0.071025 |
| 5             | 1             | 0           | 0.915297                | -1.175680 | -1.530995 |
| 6             | 1             | 0           | 1.918322                | -1.022983 | -0.070956 |
| 7             | 6             | 0           | 0.546749                | 1.344531  | -0.433406 |
| 8             | 1             | 0           | 0.561718                | 1.379618  | -1.531410 |
| 9             | 1             | 0           | -0.072576               | 2.172772  | -0.071794 |
| 10            | 1             | 0           | 1.567996                | 1.505826  | -0.070847 |
| 11            | 6             | 0           | -1.437645               | -0.199111 | -0.434124 |
| 12            | 1             | 0           | -1.475223               | -0.204094 | -1.532192 |
| 13            | 1             | 0           | -1.845273               | -1.149573 | -0.072454 |
| 14            | 1             | 0           | -2.088175               | 0.604687  | -0.072107 |

---

Zero-point correction= 0.120428 (Hartree/Particle)  
Thermal correction to Energy= 0.126753  
Thermal correction to Enthalpy= 0.127697  
Thermal correction to Gibbs Free Energy= 0.091777  
Sum of electronic and zero-point Energies= -233.107250  
Sum of electronic and thermal Energies= -233.100925  
Sum of electronic and thermal Enthalpies= -233.099981  
Sum of electronic and thermal Free Energies= -233.135901

*t*-butoxide *N*-bromophthalimide complex (S<sub>0</sub>)

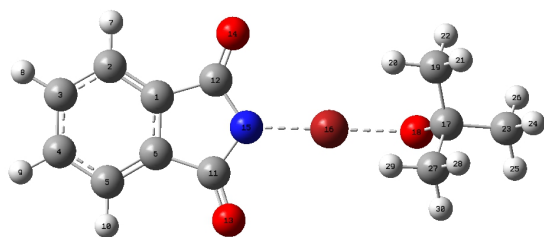

| Center Number | Atomic Number | Atomic Type | Coordinates (Angstroms) |           |           |
|---------------|---------------|-------------|-------------------------|-----------|-----------|
|               |               |             | X                       | Y         | Z         |
| 1             | 6             | 0           | -3.024903               | 0.706088  | 0.044589  |
| 2             | 6             | 0           | -4.184708               | 1.450390  | 0.184205  |
| 3             | 6             | 0           | -5.387410               | 0.748856  | 0.340738  |
| 4             | 6             | 0           | -5.408818               | -0.649085 | 0.354521  |
| 5             | 6             | 0           | -4.228277               | -1.390237 | 0.212085  |
| 6             | 6             | 0           | -3.046137               | -0.684866 | 0.058224  |
| 7             | 1             | 0           | -4.163223               | 2.533758  | 0.173004  |
| 8             | 1             | 0           | -6.316333               | 1.296267  | 0.453234  |
| 9             | 1             | 0           | -6.354093               | -1.165361 | 0.477548  |
| 10            | 1             | 0           | -4.240160               | -2.473772 | 0.222076  |
| 11            | 6             | 0           | -1.628911               | -1.154842 | -0.116107 |
| 12            | 6             | 0           | -1.594194               | 1.129305  | -0.138161 |
| 13            | 8             | 0           | -1.250389               | -2.314247 | -0.153225 |
| 14            | 8             | 0           | -1.181004               | 2.275958  | -0.196897 |
| 15            | 7             | 0           | -0.833029               | -0.025526 | -0.226210 |
| 16            | 35            | 0           | 1.197691                | -0.059382 | -0.462528 |
| 17            | 6             | 0           | 4.200941                | 0.028154  | 0.275216  |
| 18            | 8             | 0           | 3.327996                | -0.110369 | -0.826044 |
| 19            | 6             | 0           | 4.017953                | 1.392367  | 0.973369  |
| 20            | 1             | 0           | 3.007949                | 1.483640  | 1.381130  |
| 21            | 1             | 0           | 4.730033                | 1.522615  | 1.795704  |
| 22            | 1             | 0           | 4.168979                | 2.203620  | 0.254877  |
| 23            | 6             | 0           | 5.629043                | -0.055146 | -0.302029 |
| 24            | 1             | 0           | 6.385503                | 0.035425  | 0.485474  |
| 25            | 1             | 0           | 5.772850                | -1.012301 | -0.811328 |
| 26            | 1             | 0           | 5.788703                | 0.746385  | -1.028897 |
| 27            | 6             | 0           | 4.005260                | -1.109449 | 1.299950  |
| 28            | 1             | 0           | 4.724069                | -1.036476 | 2.123392  |
| 29            | 1             | 0           | 2.998375                | -1.077142 | 1.723996  |
| 30            | 1             | 0           | 4.137519                | -2.079552 | 0.811456  |

|                                              |                             |
|----------------------------------------------|-----------------------------|
| Zero-point correction=                       | 0.227512 (Hartree/Particle) |
| Thermal correction to Energy=                | 0.244878                    |
| Thermal correction to Enthalpy=              | 0.245822                    |
| Thermal correction to Gibbs Free Energy=     | 0.179765                    |
| Sum of electronic and zero-point Energies=   | -759.015660                 |
| Sum of electronic and thermal Energies=      | -758.998294                 |
| Sum of electronic and thermal Enthalpies=    | -758.997350                 |
| Sum of electronic and thermal Free Energies= | -759.063408                 |

Excited State 1: 3.000-A 2.9816 eV 415.82 nm f=0.0000 <S\*\*2>=2.000

|            |          |
|------------|----------|
| 60A -> 63A | -0.24449 |
| 61A -> 63A | -0.24700 |
| 62A -> 63A | -0.59867 |
| 60B -> 63B | 0.24449  |
| 61B -> 63B | 0.24700  |
| 62B -> 63B | 0.59867  |

This state for optimization and/or second-order correction.

Total Energy, E(TD-HF/TD-KS) = -759.133598719

Copying the excited state density for this state as the 1-particle RhoCI density.

Excited State 2: 1.000-A 3.0008 eV 413.17 nm f=0.0001 <S\*\*2>=0.000

|            |         |
|------------|---------|
| 62A -> 63A | 0.70557 |
| 62B -> 63B | 0.70557 |

Excited State 3: 3.000-A 3.0343 eV 408.61 nm f=0.0000 <S\*\*2>=2.000

|            |          |
|------------|----------|
| 57A -> 63A | -0.13212 |
| 60A -> 63A | 0.30839  |
| 61A -> 63A | 0.47915  |
| 62A -> 63A | -0.36652 |
| 57B -> 63B | 0.13212  |
| 60B -> 63B | -0.30839 |
| 61B -> 63B | -0.47915 |
| 62B -> 63B | 0.36652  |

Excited State 4: 1.000-A 3.1696 eV 391.16 nm f=0.0007 <S\*\*2>=0.000

|            |         |
|------------|---------|
| 61A -> 63A | 0.70059 |
| 61B -> 63B | 0.70059 |

Excited State 5: 3.000-A 3.1955 eV 387.99 nm f=0.0000 <S\*\*2>=2.000

|            |          |
|------------|----------|
| 55A -> 63A | 0.11989  |
| 57A -> 63A | -0.17302 |
| 58A -> 64A | 0.13197  |
| 60A -> 63A | 0.48343  |

|                   |                                                           |
|-------------------|-----------------------------------------------------------|
| 61A -> 63A        | -0.42634                                                  |
| 55B -> 63B        | -0.11989                                                  |
| 57B -> 63B        | 0.17302                                                   |
| 58B -> 64B        | -0.13197                                                  |
| 60B -> 63B        | -0.48343                                                  |
| 61B -> 63B        | 0.42634                                                   |
|                   |                                                           |
| Excited State 6:  | 3.000-A 3.3458 eV 370.57 nm f=0.0000 <S**2>=2.000         |
| 61A -> 65A        | 0.67895                                                   |
| 61A -> 67A        | 0.14228                                                   |
| 61B -> 65B        | -0.67895                                                  |
| 61B -> 67B        | -0.14228                                                  |
|                   |                                                           |
| Excited State 7:  | 3.000-A 3.4077 eV 363.83 nm f=0.0000 <S**2>=2.000         |
| 59A -> 63A        | 0.68700                                                   |
| 59B -> 63B        | -0.68700                                                  |
|                   |                                                           |
| Excited State 8:  | 3.000-A 3.4462 eV 359.77 nm f=0.0000 <S**2>=2.000         |
| 62A -> 65A        | -0.68809                                                  |
| 62A -> 67A        | -0.12023                                                  |
| 62B -> 65B        | 0.68809                                                   |
| 62B -> 67B        | 0.12023                                                   |
|                   |                                                           |
| Excited State 9:  | 3.000-A 3.5362 eV 350.62 nm f=0.0000 <S**2>=2.000         |
| 54A -> 63A        | -0.21742                                                  |
| 55A -> 63A        | -0.11422                                                  |
| 57A -> 63A        | 0.53064                                                   |
| 58A -> 64A        | -0.25262                                                  |
| 60A -> 63A        | 0.24861                                                   |
| 60A -> 68A        | -0.11694                                                  |
| 54B -> 63B        | 0.21742                                                   |
| 55B -> 63B        | 0.11422                                                   |
| 57B -> 63B        | -0.53064                                                  |
| 58B -> 64B        | 0.25262                                                   |
| 60B -> 63B        | -0.24861                                                  |
| 60B -> 68B        | 0.11694                                                   |
|                   |                                                           |
| Excited State 10: | 1.000-A 3.7289 eV 332.49 nm f=0.0090 <S**2>=0.000         |
| 60A -> 63A        | 0.69762                                                   |
| 60B -> 63B        | 0.69762                                                   |
|                   |                                                           |
| SavETr:           | write IOETrn= 770 NScale= 10 NData= 16 NLR=1 LETran= 190. |

*t*-butoxide *N*-bromophthalimide complex (S<sub>1</sub>)

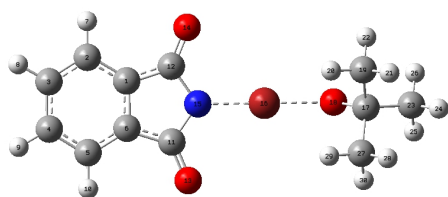

| Center<br>Number | Atomic<br>Number | Atomic<br>Type | Coordinates (Angstroms) |           |           |
|------------------|------------------|----------------|-------------------------|-----------|-----------|
|                  |                  |                | X                       | Y         | Z         |
| 1                | 6                | 0              | 3.023950                | -0.697125 | 0.059072  |
| 2                | 6                | 0              | 4.232867                | -1.390701 | 0.216948  |
| 3                | 6                | 0              | 5.397644                | -0.651177 | 0.358378  |
| 4                | 6                | 0              | 5.372469                | 0.766489  | 0.342535  |
| 5                | 6                | 0              | 4.182069                | 1.460554  | 0.185060  |
| 6                | 6                | 0              | 2.999124                | 0.721037  | 0.040244  |
| 7                | 1                | 0              | 4.253289                | -2.474649 | 0.229352  |
| 8                | 1                | 0              | 6.345150                | -1.162813 | 0.484098  |
| 9                | 1                | 0              | 6.301278                | 1.314177  | 0.455093  |
| 10               | 1                | 0              | 4.163800                | 2.544546  | 0.172146  |
| 11               | 6                | 0              | 1.623216                | 1.119702  | -0.139343 |
| 12               | 6                | 0              | 1.662844                | -1.148031 | -0.109323 |
| 13               | 8                | 0              | 1.112078                | 2.268434  | -0.209648 |
| 14               | 8                | 0              | 1.193985                | -2.315851 | -0.161280 |
| 15               | 7                | 0              | 0.841187                | -0.029700 | -0.227383 |
| 16               | 35               | 0              | -1.189546               | -0.067141 | -0.463045 |
| 17               | 6                | 0              | -4.184729               | 0.032211  | 0.278703  |
| 18               | 8                | 0              | -3.312375               | -0.120917 | -0.821900 |
| 19               | 6                | 0              | -3.989168               | -1.095512 | 1.314263  |
| 20               | 1                | 0              | -2.982600               | -1.060002 | 1.738425  |
| 21               | 1                | 0              | -4.708389               | -1.011725 | 2.135974  |
| 22               | 1                | 0              | -4.123428               | -2.070072 | 0.835662  |
| 23               | 6                | 0              | -5.611829               | -0.053407 | -0.299048 |
| 24               | 1                | 0              | -6.367515               | 0.048023  | 0.487519  |
| 25               | 1                | 0              | -5.768937               | 0.740699  | -1.034386 |
| 26               | 1                | 0              | -5.758355               | -1.015652 | -0.797607 |
| 27               | 6                | 0              | -3.995309               | 1.403575  | 0.961036  |
| 28               | 1                | 0              | -4.708354               | 1.544072  | 1.780460  |
| 29               | 1                | 0              | -2.985774               | 1.495035  | 1.369489  |
| 30               | 1                | 0              | -4.142766               | 2.207192  | 0.233524  |

```

Zero-point correction=                0.224176 (Hartree/Particle)
Thermal correction to Energy=         0.241691
Thermal correction to Enthalpy=       0.242636
Thermal correction to Gibbs Free Energy= 0.176292
Sum of electronic and zero-point Energies= -758.902665
Sum of electronic and thermal Energies= -758.885150
Sum of electronic and thermal Enthalpies= -758.884206
Sum of electronic and thermal Free Energies= -758.950549

```

Structure comparison of S0 (blue) and S1 (red). RMSD: 0.169

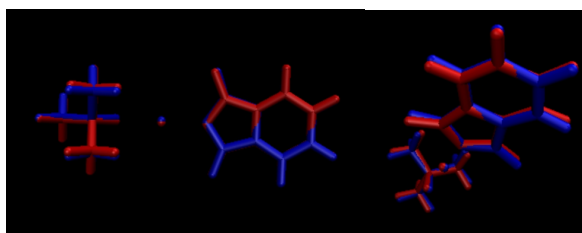

### *N*-bromophthalimide radical anion

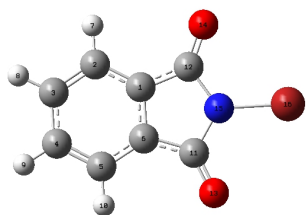

| Center Number | Atomic Number | Atomic Type | Coordinates (Angstroms) |           |           |
|---------------|---------------|-------------|-------------------------|-----------|-----------|
|               |               |             | X                       | Y         | Z         |
| 1             | 6             | 0           | -0.000015               | 1.354431  | 0.717155  |
| 2             | 6             | 0           | 0.000011                | 2.568883  | 1.423669  |
| 3             | 6             | 0           | 0.000043                | 3.757271  | 0.711630  |
| 4             | 6             | 0           | 0.000043                | 3.757271  | -0.711630 |
| 5             | 6             | 0           | 0.000011                | 2.568883  | -1.423669 |
| 6             | 6             | 0           | -0.000015               | 1.354431  | -0.717155 |
| 7             | 1             | 0           | 0.000010                | 2.570834  | 2.508530  |
| 8             | 1             | 0           | 0.000069                | 4.703351  | 1.242054  |
| 9             | 1             | 0           | 0.000069                | 4.703351  | -1.242054 |
| 10            | 1             | 0           | 0.000010                | 2.570834  | -2.508530 |
| 11            | 6             | 0           | -0.000049               | -0.004763 | -1.200298 |
| 12            | 6             | 0           | -0.000049               | -0.004763 | 1.200298  |
| 13            | 8             | 0           | -0.000032               | -0.482400 | -2.347079 |
| 14            | 8             | 0           | -0.000032               | -0.482400 | 2.347079  |
| 15            | 7             | 0           | -0.000130               | -0.768045 | 0.000000  |

16 35 0 0.000039 -2.673243 0.000000

---

Zero-point correction= 0.101514 (Hartree/Particle)  
Thermal correction to Energy= 0.111219  
Thermal correction to Enthalpy= 0.112163  
Thermal correction to Gibbs Free Energy= 0.064346  
Sum of electronic and zero-point Energies= -525.977509  
Sum of electronic and thermal Energies= -525.967803  
Sum of electronic and thermal Enthalpies= -525.966859  
Sum of electronic and thermal Free Energies= -526.014677

*t*-butoxide radical

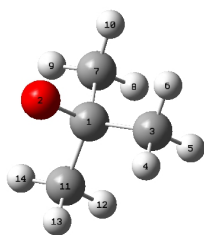

---

| Center Number | Atomic Number | Atomic Type | Coordinates (Angstroms) |           |           |
|---------------|---------------|-------------|-------------------------|-----------|-----------|
|               |               |             | X                       | Y         | Z         |
| 1             | 6             | 0           | 0.022851                | 0.000179  | 0.078789  |
| 2             | 8             | 0           | -0.158896               | -0.002651 | 1.449323  |
| 3             | 6             | 0           | 1.510957                | -0.002327 | -0.301056 |
| 4             | 1             | 0           | 2.002187                | -0.890228 | 0.104903  |
| 5             | 1             | 0           | 1.644441                | -0.000827 | -1.386032 |
| 6             | 1             | 0           | 2.005865                | 0.882234  | 0.107740  |
| 7             | 6             | 0           | -0.696373               | 1.268567  | -0.457782 |
| 8             | 1             | 0           | -0.590993               | 1.300435  | -1.544962 |
| 9             | 1             | 0           | -1.755717               | 1.247142  | -0.198646 |
| 10            | 1             | 0           | -0.243070               | 2.167942  | -0.036409 |
| 11            | 6             | 0           | -0.701359               | -1.264188 | -0.461263 |
| 12            | 1             | 0           | -0.596050               | -1.292875 | -1.548547 |
| 13            | 1             | 0           | -0.251355               | -2.166508 | -0.042715 |
| 14            | 1             | 0           | -1.760597               | -1.239502 | -0.202044 |

---



```

Zero-point correction=                0.120153 (Hartree/Particle)
Thermal correction to Energy=         0.126406
Thermal correction to Enthalpy=       0.127350
Thermal correction to Gibbs Free Energy= 0.090751
Sum of electronic and zero-point Energies= -232.961837
Sum of electronic and thermal Energies= -232.955584
Sum of electronic and thermal Enthalpies= -232.954640
Sum of electronic and thermal Free Energies= -232.991239

```

Recommended a0 for SCRF calculation = 4.06 angstrom

### Phthalimide radical

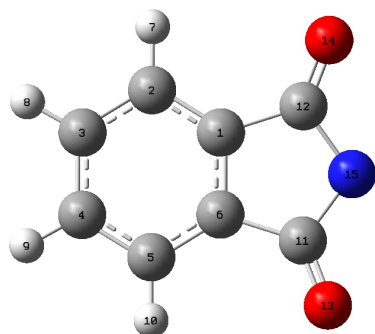

| Center Number | Atomic Number | Atomic Type | Coordinates (Angstroms) |           |           |
|---------------|---------------|-------------|-------------------------|-----------|-----------|
|               |               |             | X                       | Y         | Z         |
| 1             | 6             | 0           | 0.005697                | 0.143289  | 0.701016  |
| 2             | 6             | 0           | 0.008087                | 1.327886  | 1.427831  |
| 3             | 6             | 0           | 0.001286                | 2.518789  | 0.703829  |
| 4             | 6             | 0           | 0.001286                | 2.518789  | -0.703829 |
| 5             | 6             | 0           | 0.008087                | 1.327886  | -1.427831 |
| 6             | 6             | 0           | 0.005697                | 0.143289  | -0.701016 |
| 7             | 1             | 0           | 0.010775                | 1.324255  | 2.510532  |
| 8             | 1             | 0           | -0.005814               | 3.465910  | 1.229816  |
| 9             | 1             | 0           | -0.005814               | 3.465910  | -1.229816 |
| 10            | 1             | 0           | 0.010775                | 1.324255  | -2.510532 |
| 11            | 6             | 0           | 0.010888                | -1.272686 | -1.149464 |
| 12            | 6             | 0           | 0.010888                | -1.272686 | 1.149464  |
| 13            | 8             | 0           | -0.112315               | -1.720310 | -2.268322 |
| 14            | 8             | 0           | -0.112315               | -1.720310 | 2.268322  |
| 15            | 7             | 0           | 0.210804                | -2.094673 | 0.000000  |

```

Zero-point correction=                0.100994 (Hartree/Particle)
Thermal correction to Energy=         0.109031
Thermal correction to Enthalpy=       0.109975
Thermal correction to Gibbs Free Energy= 0.066815
Sum of electronic and zero-point Energies= -512.446220
Sum of electronic and thermal Energies= -512.438184
Sum of electronic and thermal Enthalpies= -512.437240
Sum of electronic and thermal Free Energies= -512.480400

```

### Bromo anion

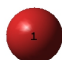

```

-----
Center      Atomic      Atomic      Coordinates (Angstroms)
Number      Number      Type        X           Y           Z
-----
1           35           0           0.000000    0.000000    0.000000
-----

```

```

Zero-point correction=                0.000000 (Hartree/Particle)
Thermal correction to Energy=         0.001416
Thermal correction to Enthalpy=       0.002360
Thermal correction to Gibbs Free Energy= -0.016176
Sum of electronic and zero-point Energies= -13.557361
Sum of electronic and thermal Energies= -13.555945
Sum of electronic and thermal Enthalpies= -13.555001
Sum of electronic and thermal Free Energies= -13.573537

```

### *N,N*-dimethylacetamide radical

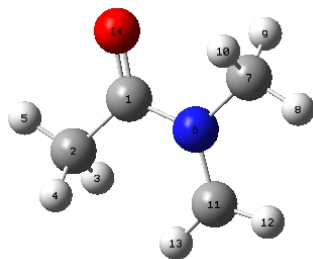

```

-----
Center      Atomic      Atomic      Coordinates (Angstroms)
Number      Number      Type        X           Y           Z
-----
1           6           0           -0.664759   -0.323024   -0.000047
-----

```

|    |   |   |           |           |           |
|----|---|---|-----------|-----------|-----------|
| 2  | 6 | 0 | -1.834516 | 0.631561  | 0.000071  |
| 3  | 1 | 0 | -1.821776 | 1.277216  | 0.882864  |
| 4  | 1 | 0 | -1.822464 | 1.276877  | -0.882966 |
| 5  | 1 | 0 | -2.751318 | 0.045880  | 0.000457  |
| 6  | 7 | 0 | 0.606554  | 0.222876  | -0.000097 |
| 7  | 6 | 0 | 1.730274  | -0.725516 | -0.000010 |
| 8  | 1 | 0 | 2.660449  | -0.162624 | -0.001826 |
| 9  | 1 | 0 | 1.687266  | -1.359783 | 0.885823  |
| 10 | 1 | 0 | 1.685189  | -1.362071 | -0.884057 |
| 11 | 6 | 0 | 0.875187  | 1.572965  | 0.000236  |
| 12 | 1 | 0 | 1.905603  | 1.885903  | 0.000234  |
| 13 | 1 | 0 | 0.066408  | 2.281773  | -0.001338 |
| 14 | 8 | 0 | -0.811544 | -1.547401 | -0.000002 |

-----

Zero-point correction= 0.115499 (Hartree/Particle)  
Thermal correction to Energy= 0.123259  
Thermal correction to Enthalpy= 0.124203  
Thermal correction to Gibbs Free Energy= 0.082985  
Sum of electronic and zero-point Energies= -287.154576  
Sum of electronic and thermal Energies= -287.146816  
Sum of electronic and thermal Enthalpies= -287.145872  
Sum of electronic and thermal Free Energies= -287.187091

*t*-butanol

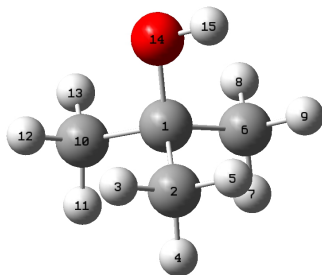

-----

| Center<br>Number | Atomic<br>Number | Atomic<br>Type | Coordinates (Angstroms) |           |           |
|------------------|------------------|----------------|-------------------------|-----------|-----------|
|                  |                  |                | X                       | Y         | Z         |
| 1                | 6                | 0              | -0.006713               | 0.000003  | 0.009767  |
| 2                | 6                | 0              | 0.676866                | -1.263408 | -0.527333 |
| 3                | 1                | 0              | 0.200974                | -2.157482 | -0.116916 |
| 4                | 1                | 0              | 0.614388                | -1.307901 | -1.618186 |
| 5                | 1                | 0              | 1.736241                | -1.279254 | -0.251590 |
| 6                | 6                | 0              | 0.676093                | 1.263934  | -0.527103 |

-----

|    |   |   |           |           |           |
|----|---|---|-----------|-----------|-----------|
| 7  | 1 | 0 | 0.613540  | 1.308614  | -1.617945 |
| 8  | 1 | 0 | 0.199685  | 2.157637  | -0.116480 |
| 9  | 1 | 0 | 1.735469  | 1.280358  | -0.251403 |
| 10 | 6 | 0 | -1.498422 | -0.000424 | -0.322665 |
| 11 | 1 | 0 | -1.650590 | -0.000380 | -1.404549 |
| 12 | 1 | 0 | -1.982235 | -0.887193 | 0.094473  |
| 13 | 1 | 0 | -1.982778 | 0.885980  | 0.094619  |
| 14 | 8 | 0 | 0.055619  | -0.000114 | 1.458739  |
| 15 | 1 | 0 | 0.983417  | -0.000092 | 1.722070  |

-----

Zero-point correction= 0.134595 (Hartree/Particle)  
Thermal correction to Energy= 0.141383  
Thermal correction to Enthalpy= 0.142327  
Thermal correction to Gibbs Free Energy= 0.105547  
Sum of electronic and zero-point Energies= -233.622356  
Sum of electronic and thermal Energies= -233.615568  
Sum of electronic and thermal Enthalpies= -233.614624  
Sum of electronic and thermal Free Energies= -233.651403

### *N,N*-dimethylacetamide radical cation

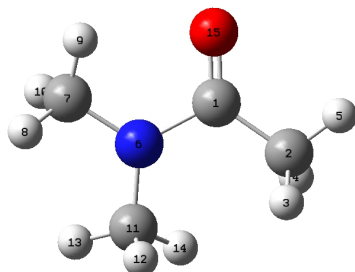

-----

| Center<br>Number | Atomic<br>Number | Atomic<br>Type | Coordinates (Angstroms) |           |           |
|------------------|------------------|----------------|-------------------------|-----------|-----------|
|                  |                  |                | X                       | Y         | Z         |
| 1                | 6                | 0              | 0.785090                | -0.320787 | 0.000689  |
| 2                | 6                | 0              | 1.814695                | 0.759079  | -0.029004 |
| 3                | 1                | 0              | 1.633117                | 1.466370  | -0.840293 |
| 4                | 1                | 0              | 1.814390                | 1.312423  | 0.914221  |
| 5                | 1                | 0              | 2.786263                | 0.288885  | -0.161363 |
| 6                | 7                | 0              | -0.635144               | 0.101689  | -0.003952 |
| 7                | 6                | 0              | -1.663016               | -0.908388 | -0.034644 |
| 8                | 1                | 0              | -2.452310               | -0.585208 | -0.718047 |
| 9                | 1                | 0              | -1.241594               | -1.869921 | -0.307822 |

-----

|    |   |   |           |           |           |
|----|---|---|-----------|-----------|-----------|
| 10 | 1 | 0 | -2.105656 | -0.971272 | 0.971026  |
| 11 | 6 | 0 | -1.022074 | 1.492470  | 0.034507  |
| 12 | 1 | 0 | -0.969954 | 1.890162  | -0.991128 |
| 13 | 1 | 0 | -2.046232 | 1.579206  | 0.390182  |
| 14 | 1 | 0 | -0.335841 | 2.067283  | 0.654608  |
| 15 | 8 | 0 | 0.984456  | -1.502999 | 0.035875  |

---

|                                              |                             |
|----------------------------------------------|-----------------------------|
| Zero-point correction=                       | 0.127326 (Hartree/Particle) |
| Thermal correction to Energy=                | 0.135234                    |
| Thermal correction to Enthalpy=              | 0.136178                    |
| Thermal correction to Gibbs Free Energy=     | 0.094665                    |
| Sum of electronic and zero-point Energies=   | -287.543283                 |
| Sum of electronic and thermal Energies=      | -287.535374                 |
| Sum of electronic and thermal Enthalpies=    | -287.534430                 |
| Sum of electronic and thermal Free Energies= | -287.575943                 |

### Radical-radical coupling product

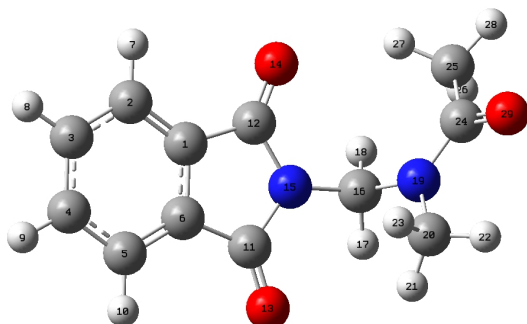


---

| Center Number | Atomic Number | Atomic Type | Coordinates (Angstroms) |           |           |
|---------------|---------------|-------------|-------------------------|-----------|-----------|
|               |               |             | X                       | Y         | Z         |
| 1             | 6             | 0           | 1.811709                | -0.776915 | -0.024080 |
| 2             | 6             | 0           | 2.794791                | -1.688401 | 0.325519  |
| 3             | 6             | 0           | 4.073067                | -1.185072 | 0.592893  |
| 4             | 6             | 0           | 4.342516                | 0.184492  | 0.507142  |
| 5             | 6             | 0           | 3.342836                | 1.097148  | 0.151293  |
| 6             | 6             | 0           | 2.080629                | 0.589146  | -0.110283 |
| 7             | 1             | 0           | 2.582296                | -2.748466 | 0.390071  |
| 8             | 1             | 0           | 4.868121                | -1.866594 | 0.871022  |
| 9             | 1             | 0           | 5.342356                | 0.543604  | 0.720161  |
| 10            | 1             | 0           | 3.547833                | 2.158501  | 0.083596  |
| 11            | 6             | 0           | 0.826118                | 1.287602  | -0.505263 |

|    |   |   |           |           |           |
|----|---|---|-----------|-----------|-----------|
| 12 | 6 | 0 | 0.378778  | -0.992284 | -0.367087 |
| 13 | 8 | 0 | 0.637006  | 2.467653  | -0.703421 |
| 14 | 8 | 0 | -0.244050 | -2.029518 | -0.437766 |
| 15 | 7 | 0 | -0.152401 | 0.282821  | -0.622767 |
| 16 | 6 | 0 | -1.538562 | 0.534160  | -1.021456 |
| 17 | 1 | 0 | -1.535341 | 1.496328  | -1.534878 |
| 18 | 1 | 0 | -1.833451 | -0.239537 | -1.722498 |
| 19 | 7 | 0 | -2.463205 | 0.578761  | 0.095121  |
| 20 | 6 | 0 | -2.295841 | 1.679393  | 1.048210  |
| 21 | 1 | 0 | -1.918959 | 2.553599  | 0.517357  |
| 22 | 1 | 0 | -3.257091 | 1.911195  | 1.500683  |
| 23 | 1 | 0 | -1.591904 | 1.419226  | 1.844781  |
| 24 | 6 | 0 | -3.409992 | -0.381384 | 0.357774  |
| 25 | 6 | 0 | -3.615947 | -1.493322 | -0.652784 |
| 26 | 1 | 0 | -3.922699 | -1.097291 | -1.624453 |
| 27 | 1 | 0 | -2.704947 | -2.078445 | -0.791366 |
| 28 | 1 | 0 | -4.404720 | -2.139920 | -0.274013 |
| 29 | 8 | 0 | -4.093315 | -0.321966 | 1.378910  |

-----

Zero-point correction= 0.226319 (Hartree/Particle)  
Thermal correction to Energy= 0.241767  
Thermal correction to Enthalpy= 0.242711  
Thermal correction to Gibbs Free Energy= 0.182213  
Sum of electronic and zero-point Energies= -799.735744  
Sum of electronic and thermal Energies= -799.720296  
Sum of electronic and thermal Enthalpies= -799.719352  
Sum of electronic and thermal Free Energies= -799.779850

### EDA complex TS

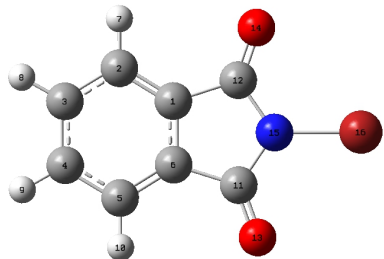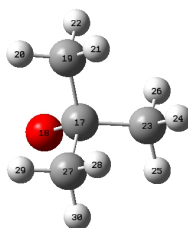

-----

| Center Number | Atomic Number | Atomic Type | Coordinates (Angstroms) |          |          |
|---------------|---------------|-------------|-------------------------|----------|----------|
|               |               |             | X                       | Y        | Z        |
| 1             | 6             | 0           | -3.086344               | 0.707528 | 0.050614 |

-----

|    |    |   |           |           |           |
|----|----|---|-----------|-----------|-----------|
| 2  | 6  | 0 | -4.246117 | 1.452931  | 0.183539  |
| 3  | 6  | 0 | -5.450255 | 0.752071  | 0.329820  |
| 4  | 6  | 0 | -5.473355 | -0.645761 | 0.340412  |
| 5  | 6  | 0 | -4.293076 | -1.388240 | 0.205237  |
| 6  | 6  | 0 | -3.109290 | -0.683735 | 0.061434  |
| 7  | 1  | 0 | -4.223102 | 2.536112  | 0.174766  |
| 8  | 1  | 0 | -6.379213 | 1.300277  | 0.436709  |
| 9  | 1  | 0 | -6.419944 | -1.161239 | 0.455248  |
| 10 | 1  | 0 | -4.305853 | -2.471610 | 0.212783  |
| 11 | 6  | 0 | -1.698718 | -1.161959 | -0.102777 |
| 12 | 6  | 0 | -1.660918 | 1.136380  | -0.121144 |
| 13 | 8  | 0 | -1.314492 | -2.315977 | -0.138322 |
| 14 | 8  | 0 | -1.238862 | 2.276423  | -0.174992 |
| 15 | 7  | 0 | -0.896278 | -0.026457 | -0.207646 |
| 16 | 35 | 0 | 0.989285  | -0.057569 | -0.416948 |
| 17 | 6  | 0 | 4.492316  | 0.022766  | 0.214233  |
| 18 | 8  | 0 | 3.602876  | -0.117627 | -0.859356 |
| 19 | 6  | 0 | 4.317511  | 1.389204  | 0.919008  |
| 20 | 1  | 0 | 3.307850  | 1.480338  | 1.328912  |
| 21 | 1  | 0 | 5.032082  | 1.522519  | 1.739769  |
| 22 | 1  | 0 | 4.464992  | 2.200593  | 0.199298  |
| 23 | 6  | 0 | 5.926469  | -0.059126 | -0.355488 |
| 24 | 1  | 0 | 6.686269  | 0.034454  | 0.429665  |
| 25 | 1  | 0 | 6.071782  | -1.017231 | -0.863720 |
| 26 | 1  | 0 | 6.085121  | 0.740119  | -1.085945 |
| 27 | 6  | 0 | 4.308602  | -1.108455 | 1.254012  |
| 28 | 1  | 0 | 5.029804  | -1.030956 | 2.076008  |
| 29 | 1  | 0 | 3.302011  | -1.075463 | 1.679985  |
| 30 | 1  | 0 | 4.440061  | -2.081979 | 0.771193  |

-----

|                                              |                             |
|----------------------------------------------|-----------------------------|
| Zero-point correction=                       | 0.226278 (Hartree/Particle) |
| Thermal correction to Energy=                | 0.243296                    |
| Thermal correction to Enthalpy=              | 0.244240                    |
| Thermal correction to Gibbs Free Energy=     | 0.178517                    |
| Sum of electronic and zero-point Energies=   | -758.997338                 |
| Sum of electronic and thermal Energies=      | -758.980321                 |
| Sum of electronic and thermal Enthalpies=    | -758.979376                 |
| Sum of electronic and thermal Free Energies= | -759.045100                 |

Imaginary frequency (1): -44.37

# HATTS

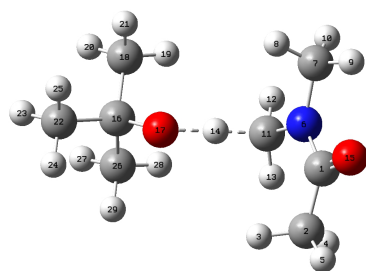

| Center Number | Atomic Number | Atomic Type | Coordinates (Angstroms) |           |           |
|---------------|---------------|-------------|-------------------------|-----------|-----------|
|               |               |             | X                       | Y         | Z         |
| 1             | 6             | 0           | 2.739827                | -0.412638 | 0.182421  |
| 2             | 6             | 0           | 2.489249                | -1.860245 | -0.183157 |
| 3             | 1             | 0           | 1.488364                | -2.181134 | 0.114249  |
| 4             | 1             | 0           | 2.587953                | -2.020916 | -1.259801 |
| 5             | 1             | 0           | 3.228576                | -2.468222 | 0.333518  |
| 6             | 7             | 0           | 1.888461                | 0.539546  | -0.349561 |
| 7             | 6             | 0           | 2.053479                | 1.938577  | 0.052257  |
| 8             | 1             | 0           | 1.348769                | 2.195879  | 0.848706  |
| 9             | 1             | 0           | 3.066680                | 2.088886  | 0.413038  |
| 10            | 1             | 0           | 1.867113                | 2.582201  | -0.808343 |
| 11            | 6             | 0           | 0.719831                | 0.213567  | -1.087751 |
| 12            | 1             | 0           | 0.419366                | 1.038290  | -1.732669 |
| 13            | 1             | 0           | 0.804396                | -0.716793 | -1.642078 |
| 14            | 1             | 0           | -0.216735               | 0.043586  | -0.311237 |
| 15            | 8             | 0           | 3.671326                | -0.088573 | 0.912537  |
| 16            | 6             | 0           | -2.484793               | -0.067999 | 0.127930  |
| 17            | 8             | 0           | -1.168924               | -0.178812 | 0.639804  |
| 18            | 6             | 0           | -2.769979               | 1.365387  | -0.351221 |
| 19            | 1             | 0           | -2.123696               | 1.627594  | -1.193368 |
| 20            | 1             | 0           | -3.808201               | 1.470386  | -0.678911 |
| 21            | 1             | 0           | -2.587945               | 2.077827  | 0.457163  |
| 22            | 6             | 0           | -3.385251               | -0.407650 | 1.337772  |
| 23            | 1             | 0           | -4.436525               | -0.348918 | 1.041980  |
| 24            | 1             | 0           | -3.177807               | -1.417992 | 1.696576  |
| 25            | 1             | 0           | -3.211585               | 0.297557  | 2.153350  |
| 26            | 6             | 0           | -2.720881               | -1.084141 | -1.002281 |
| 27            | 1             | 0           | -3.758072               | -1.051369 | -1.347565 |
| 28            | 1             | 0           | -2.075091               | -0.866839 | -1.857861 |
| 29            | 1             | 0           | -2.502894               | -2.096906 | -0.654368 |



Zero-point correction= 0.247960 (Hartree/Particle)  
 Thermal correction to Energy= 0.262991  
 Thermal correction to Enthalpy= 0.263935  
 Thermal correction to Gibbs Free Energy= 0.203140  
 Sum of electronic and zero-point Energies= -520.753031  
 Sum of electronic and thermal Energies= -520.738001  
 Sum of electronic and thermal Enthalpies= -520.737057  
 Sum of electronic and thermal Free Energies= -520.797851

Imaginary frequency (1): -1050.53

### Radical-radical coupling TS

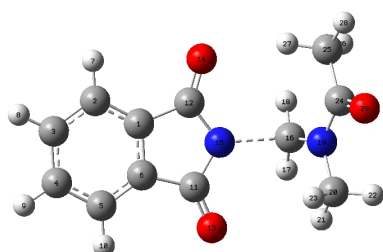

| Center Number | Atomic Number | Atomic Type | Coordinates (Angstroms) |           |           |
|---------------|---------------|-------------|-------------------------|-----------|-----------|
|               |               |             | X                       | Y         | Z         |
| 1             | 6             | 0           | 1.993792                | -0.736850 | -0.043111 |
| 2             | 6             | 0           | 3.054067                | -1.581815 | 0.237122  |
| 3             | 6             | 0           | 4.288958                | -0.990026 | 0.533262  |
| 4             | 6             | 0           | 4.438611                | 0.399717  | 0.544368  |
| 5             | 6             | 0           | 3.358543                | 1.245278  | 0.259310  |
| 6             | 6             | 0           | 2.143245                | 0.649837  | -0.032456 |
| 7             | 1             | 0           | 2.935085                | -2.658706 | 0.227769  |
| 8             | 1             | 0           | 5.143194                | -1.618277 | 0.757416  |
| 9             | 1             | 0           | 5.406579                | 0.828156  | 0.777034  |
| 10            | 1             | 0           | 3.471477                | 2.322854  | 0.266839  |
| 11            | 6             | 0           | 0.808465                | 1.244781  | -0.378595 |
| 12            | 6             | 0           | 0.563430                | -1.031404 | -0.395608 |
| 13            | 8             | 0           | 0.527169                | 2.427352  | -0.495165 |
| 14            | 8             | 0           | 0.042953                | -2.129437 | -0.526026 |
| 15            | 7             | 0           | -0.063505               | 0.187505  | -0.548223 |
| 16            | 6             | 0           | -1.947894               | 0.454222  | -1.185087 |
| 17            | 1             | 0           | -1.703304               | 1.358876  | -1.721956 |

|    |   |   |           |           |           |
|----|---|---|-----------|-----------|-----------|
| 18 | 1 | 0 | -1.994461 | -0.457093 | -1.759655 |
| 19 | 7 | 0 | -2.798091 | 0.586364  | -0.143019 |
| 20 | 6 | 0 | -2.891184 | 1.879943  | 0.553990  |
| 21 | 1 | 0 | -2.441846 | 2.644025  | -0.075210 |
| 22 | 1 | 0 | -3.935632 | 2.116709  | 0.745285  |
| 23 | 1 | 0 | -2.356818 | 1.834268  | 1.504339  |
| 24 | 6 | 0 | -3.469384 | -0.512766 | 0.444434  |
| 25 | 6 | 0 | -3.355644 | -1.854575 | -0.229929 |
| 26 | 1 | 0 | -3.761615 | -1.818591 | -1.244379 |
| 27 | 1 | 0 | -2.313097 | -2.179810 | -0.291126 |
| 28 | 1 | 0 | -3.929972 | -2.569466 | 0.354996  |
| 29 | 8 | 0 | -4.119927 | -0.325174 | 1.452584  |

-----

|                                              |                             |
|----------------------------------------------|-----------------------------|
| Zero-point correction=                       | 0.223655 (Hartree/Particle) |
| Thermal correction to Energy=                | 0.238938                    |
| Thermal correction to Enthalpy=              | 0.239883                    |
| Thermal correction to Gibbs Free Energy=     | 0.179647                    |
| Sum of electronic and zero-point Energies=   | -799.698534                 |
| Sum of electronic and thermal Energies=      | -799.683251                 |
| Sum of electronic and thermal Enthalpies=    | -799.682307                 |
| Sum of electronic and thermal Free Energies= | -799.742542                 |
